# Supplementary material for: Nonspherical anion sequestration by C–H hydrogen bonding
Source: Royal Society of Chemistry journal article supplement (doi:10.1039/d1sc07041j), 2022-01-01
Supplement: d1sc07041j1.pdf [file d1sc07041j1.pdf]

**Supplementary Information for:**

**“Nonspherical Anion Sequestration by C-H Hydrogen Bonding”**

Saber Mirzaei, Victor M. Espinoza Castro and Raúl Hernández Sánchez\*

*Department of Chemistry, Dietrich School of Arts & Sciences,  
University of Pittsburgh, 219 Parkman Ave., Pittsburgh, PA, 15260, USA.*

*Corresponding author e-mail: raulhs@pitt.edu*

## Table of Contents

|                                                                                                                                      |     |
|--------------------------------------------------------------------------------------------------------------------------------------|-----|
| <b>Experimental section</b>                                                                                                          | S6  |
| <b>Table S1:</b> Crystallographic data for compounds <b>1 – 8</b> , and $[\text{MeSO}_3]^-$ adducts with <b>4</b> and <b>6 – 8</b> . | S21 |
| <b>Figure S1:</b> Molecular crystal structure of <b>1</b> .                                                                          | S24 |
| <b>Figure S2:</b> Molecular crystal structure of <b>2</b> .                                                                          | S25 |
| <b>Figure S3:</b> Molecular crystal structure of <b>3</b> .                                                                          | S26 |
| <b>Figure S4:</b> Molecular crystal structure of <b>4</b> .                                                                          | S27 |
| <b>Figure S5:</b> Molecular crystal structure of <b>5</b> .                                                                          | S28 |
| <b>Figure S6:</b> Molecular crystal structure of <b>6</b> .                                                                          | S29 |
| <b>Figure S7:</b> Molecular crystal structure of <b>7</b> .                                                                          | S30 |
| <b>Figure S8:</b> Molecular crystal structure of <b>8</b> .                                                                          | S31 |
| <b>Figure S9:</b> Molecular crystal structure of $[\text{MeSO}_3 \subset \mathbf{4}]^-$ .                                            | S32 |
| <b>Figure S10:</b> Molecular crystal structure of $[\text{MeSO}_3 \subset \mathbf{6}]^-$ .                                           | S33 |
| <b>Figure S11:</b> Molecular crystal structure of $[\text{MeSO}_3 \subset \mathbf{7}]^-$ .                                           | S34 |
| <b>Figure S12:</b> Molecular crystal structure of $[\text{MeSO}_3 \subset \mathbf{8}]^-$ .                                           | S35 |
| <b>Figure S13:</b> $^1\text{H}$ and $^{13}\text{C}$ NMR spectra of compound <b>S1</b> .                                              | S36 |
| <b>Figure S14:</b> $^1\text{H}$ and $^{13}\text{C}$ NMR spectra of compound <b>S2</b> .                                              | S37 |
| <b>Figure S15:</b> $^1\text{H}$ and $^{13}\text{C}$ NMR spectra of compound <b>1</b> .                                               | S38 |
| <b>Figure S16:</b> COSY NMR spectrum of compound <b>1</b> .                                                                          | S39 |
| <b>Figure S17:</b> $^1\text{H}$ and $^{13}\text{C}$ NMR spectra of compound <b>2</b> .                                               | S40 |
| <b>Figure S18:</b> COSY NMR spectrum of compound <b>2</b> .                                                                          | S41 |
| <b>Figure S19:</b> $^{19}\text{F}$ NMR spectrum of compound <b>2</b> .                                                               | S42 |
| <b>Figure S20:</b> $^1\text{H}$ and $^{13}\text{C}$ NMR spectra of compound <b>3</b> .                                               | S43 |
| <b>Figure S21:</b> COSY NMR spectrum of compound <b>3</b> .                                                                          | S44 |
| <b>Figure S22:</b> $^{19}\text{F}$ NMR spectrum of compound <b>3</b> .                                                               | S45 |

|                                                                                                                     |     |
|---------------------------------------------------------------------------------------------------------------------|-----|
| <b>Figure S23:</b> $^1\text{H}$ and $^{13}\text{C}$ NMR spectra of compound <b>4</b> .                              | S46 |
| <b>Figure S24:</b> COSY NMR spectrum of compound <b>4</b> .                                                         | S47 |
| <b>Figure S25:</b> $^{19}\text{F}$ NMR spectrum of compound <b>4</b> .                                              | S48 |
| <b>Figure S26:</b> $^1\text{H}$ and $^{13}\text{C}$ NMR spectra of compound <b>5</b> .                              | S49 |
| <b>Figure S27:</b> COSY NMR spectrum of compound <b>5</b> .                                                         | S50 |
| <b>Figure S28:</b> $^{19}\text{F}$ NMR spectrum of compound <b>5</b> .                                              | S51 |
| <b>Figure S29:</b> $^1\text{H}$ and $^{13}\text{C}$ NMR spectra of compound <b>6</b> .                              | S52 |
| <b>Figure S30:</b> COSY NMR spectrum of compound <b>6</b> .                                                         | S53 |
| <b>Figure S31:</b> $^{19}\text{F}$ NMR spectra of compound <b>6</b> .                                               | S54 |
| <b>Figure S32:</b> $^1\text{H}$ and $^{13}\text{C}$ NMR spectra of compound <b>7</b> .                              | S55 |
| <b>Figure S33:</b> COSY NMR spectrum of compound <b>7</b> .                                                         | S56 |
| <b>Figure S34:</b> $^{19}\text{F}$ NMR spectrum of compound <b>7</b> .                                              | S57 |
| <b>Figure S35:</b> $^1\text{H}$ and $^{13}\text{C}$ NMR spectra of compound <b>8</b> .                              | S58 |
| <b>Figure S36:</b> COSY NMR spectrum of compound <b>8</b> .                                                         | S59 |
| <b>Figure S37:</b> $^{19}\text{F}$ NMR spectrum of compound <b>8</b> .                                              | S60 |
| <b>Figure S38:</b> $^1\text{H}$ NMR titration spectra of $[n\text{-Bu}_4\text{N}][\text{PF}_6]$ added to <b>2</b> . | S61 |
| <b>Figure S39:</b> $^1\text{H}$ NMR titration spectra of $[n\text{-Bu}_4\text{N}][\text{PF}_6]$ added to <b>3</b> . | S62 |
| <b>Figure S40:</b> $^1\text{H}$ NMR titration spectra of $[n\text{-Bu}_4\text{N}][\text{PF}_6]$ added to <b>4</b> . | S63 |
| <b>Figure S41:</b> $^1\text{H}$ NMR titration spectra of $[n\text{-Bu}_4\text{N}][\text{PF}_6]$ added to <b>5</b> . | S64 |
| <b>Figure S42:</b> $^1\text{H}$ NMR titration spectra of $[n\text{-Bu}_4\text{N}][\text{PF}_6]$ added to <b>6</b> . | S65 |
| <b>Figure S43:</b> $^1\text{H}$ NMR titration spectra of $[n\text{-Bu}_4\text{N}][\text{PF}_6]$ added to <b>7</b> . | S66 |
| <b>Figure S44:</b> $^1\text{H}$ NMR titration spectra of $[n\text{-Bu}_4\text{N}][\text{PF}_6]$ added to <b>8</b> . | S67 |
| <b>Figure S45:</b> $^1\text{H}$ NMR titration spectra of $[n\text{-Bu}_4\text{N}][\text{I}]$ added to <b>6</b> .    | S68 |
| <b>Figure S46:</b> $^1\text{H}$ NMR titration spectra of $[n\text{-Bu}_4\text{N}][\text{Br}]$ added to <b>6</b> .   | S69 |
| <b>Figure S47:</b> $^1\text{H}$ NMR titration spectra of $[n\text{-Bu}_4\text{N}][\text{N}_3]$ added to <b>6</b> .  | S70 |
| <b>Figure S48:</b> $^1\text{H}$ NMR titration spectra of $[n\text{-Bu}_4\text{N}][\text{SCN}]$ added to <b>6</b> .  | S71 |
| <b>Figure S49:</b> $^1\text{H}$ NMR titration spectra of $[n\text{-Bu}_4\text{N}][\text{NO}_2]$ added to <b>6</b> . | S72 |

|                                                                                                                                                       |     |
|-------------------------------------------------------------------------------------------------------------------------------------------------------|-----|
| <b>Figure S50:</b> $^1\text{H}$ NMR titration spectra of $[n\text{-Bu}_4\text{N}][\text{NO}_3]$ added to <b>6</b> .                                   | S73 |
| <b>Figure S51:</b> $^1\text{H}$ NMR titration spectra of $[n\text{-Bu}_4\text{N}][\text{BF}_4]$ added to <b>6</b> .                                   | S74 |
| <b>Figure S52:</b> $^1\text{H}$ NMR titration spectra of $[n\text{-Bu}_4\text{N}][\text{HSO}_4]$ added to <b>6</b> .                                  | S75 |
| <b>Figure S53:</b> $^1\text{H}$ NMR titration spectra of $[n\text{-Bu}_4\text{N}][\text{ClO}_4]$ added to <b>6</b> .                                  | S76 |
| <b>Figure S54:</b> $^1\text{H}$ NMR titration spectra of $[n\text{-Bu}_4\text{N}][\text{ReO}_4]$ added to <b>6</b> .                                  | S77 |
| <b>Figure S55:</b> $^1\text{H}$ NMR titration spectra of $[n\text{-Bu}_4\text{N}][\text{IO}_4]$ added to <b>6</b> .                                   | S78 |
| <b>Figure S56:</b> $^1\text{H}$ NMR titration spectra of $[n\text{-Bu}_4\text{N}][\text{SbF}_6]$ added to <b>6</b> .                                  | S79 |
| <b>Figure S57:</b> $^1\text{H}$ NMR titration spectra of $[n\text{-Bu}_4\text{N}][\text{MeCO}_2]$ added to <b>6</b> .                                 | S80 |
| <b>Figure S58:</b> $^1\text{H}$ NMR titration spectra of $[n\text{-Bu}_4\text{N}][\text{MeSO}_3]$ added to <b>6</b> .                                 | S81 |
| <b>Figure S59:</b> $^1\text{H}$ NMR titration spectra of $[n\text{-Bu}_4\text{N}][p\text{TsO}]$ added to <b>6</b> .                                   | S82 |
| <b>Figure S60:</b> Zoomed-in $^1\text{H}$ NMR titration spectra of $[n\text{-Bu}_4\text{N}][p\text{TsO}]$ added to <b>6</b> .                         | S83 |
| <b>Figure S61:</b> $^1\text{H}$ NMR titration spectra of $[n\text{-Bu}_4\text{N}][\text{MeSO}_3]$ added to <b>1</b> .                                 | S84 |
| <b>Figure S62:</b> $^1\text{H}$ NMR titration spectra of $[n\text{-Bu}_4\text{N}][\text{MeSO}_3]$ added to <b>2</b> .                                 | S85 |
| <b>Figure S63:</b> $^1\text{H}$ NMR titration spectra of $[n\text{-Bu}_4\text{N}][\text{MeSO}_3]$ added to <b>3</b> .                                 | S86 |
| <b>Figure S64:</b> $^1\text{H}$ NMR titration spectra of $[n\text{-Bu}_4\text{N}][\text{MeSO}_3]$ added to <b>4</b> .                                 | S87 |
| <b>Figure S65:</b> $^1\text{H}$ NMR titration spectra of $[n\text{-Bu}_4\text{N}][\text{MeSO}_3]$ added to <b>5</b> .                                 | S88 |
| <b>Figure S66:</b> $^1\text{H}$ NMR titration spectra of $[n\text{-Bu}_4\text{N}][\text{MeSO}_3]$ added to <b>7</b> .                                 | S89 |
| <b>Figure S67:</b> $^1\text{H}$ NMR titration spectra of $[n\text{-Bu}_4\text{N}][\text{MeSO}_3]$ added to <b>8</b> .                                 | S90 |
| <b>Figure S68:</b> $^1\text{H}$ NMR spectra of $[n\text{-Bu}_4\text{N}][\text{MeSO}_3 \subset \mathbf{4}]$ in $\text{CDCl}_3$ and $\text{DMSO-}d_6$ . | S91 |
| <b>Figure S69:</b> $^1\text{H}$ NMR spectra of $[n\text{-Bu}_4\text{N}][\text{MeSO}_3 \subset \mathbf{5}]$ in $\text{CDCl}_3$ and $\text{DMSO-}d_6$ . | S92 |
| <b>Figure S70:</b> $^1\text{H}$ NMR spectra of $[n\text{-Bu}_4\text{N}][\text{MeSO}_3 \subset \mathbf{6}]$ in $\text{CDCl}_3$ and $\text{DMSO-}d_6$ . | S93 |
| <b>Figure S71:</b> $^1\text{H}$ NMR spectra of $[n\text{-Bu}_4\text{N}][\text{MeSO}_3 \subset \mathbf{7}]$ in $\text{CDCl}_3$ and $\text{DMSO-}d_6$ . | S94 |
| <b>Table S2:</b> DFT calculated conformational energies of the six rotamers of <b>5</b> .                                                             | S95 |
| <b>Table S3:</b> DFT calculated conformational energies of the six rotamers of <b>7</b> .                                                             | S96 |
| <b>Table S4:</b> $K_{\text{as}}$ calculated from the single-point method for slow exchange processes.                                                 | S97 |
| <b>Table S5:</b> DFT calculated rotational barriers of biaryl bonds for <b>1 – 7</b> .                                                                | S98 |
| <b>Figure S72:</b> DFT optimized molecular structures and HCs of reported hosts <b>9</b> and <b>10</b> .                                              | S99 |



**Cartesian coordinates of all DFT optimized molecules.**

S100

**References**

S131

## Experimental section

**General considerations.** All manipulations were performed under an atmosphere of dry, oxygen-free N<sub>2</sub> by means of standard Schlenk or glovebox techniques (MBraun glovebox equipped with a -35 °C freezer), unless otherwise noted. All glassware was oven dried for a minimum of 10 h and cooled in an evacuated antechamber prior to use in the drybox. Anhydrous and anaerobic tetrahydrofuran (THF), hexanes, and dichloromethane (DCM) were dried and deoxygenated on dual high-performance columns within a Glass Contour 800L Solvent Purification System and stored over 4 Å molecular sieves prior to use. All fluorinated chemicals were purchased through commercial suppliers and used without further purification. Additional dry, oxygen-free solvents were stored within an Mbraun glovebox and kept over 4 Å molecular sieves. Chemicals and solvents were purchased from commercial suppliers and used as received. TBA and [n-Bu<sub>4</sub>N]<sup>+</sup> are used throughout this document to refer to the tetra-*n*-butylammonium cation. Compound **S1** was synthesized according to published procedures.<sup>1</sup>

<sup>1</sup>H-, <sup>13</sup>C- and <sup>19</sup>F nuclear magnetic resonance (NMR) spectra were obtained using a Bruker Avance 400 MHz spectrometer. Chemical shifts for protons are reported in parts per million (ppm) downfield from tetramethylsilane (TMS) and are referenced to residual protium in the NMR solvent (CHCl<sub>3</sub>: δ 7.26 and (CH<sub>3</sub>)<sub>2</sub>SO: δ 2.50). Chemical shifts for carbon are reported in ppm downfield from TMS and are referenced to the carbon resonances of the solvent (CDCl<sub>3</sub>: δ 77.2). Data are presented as follows: chemical shift, multiplicity (s = singlet, d = doublet, t = triplet, m = multiplet, br = broad), coupling constants in Hertz, and integration. Some <sup>1</sup>H NMR and <sup>13</sup>C NMR were recorded at high temperatures to enhance signal resolution.

High-resolution mass spectrometry (HRMS) was performed on a Thermo Scientific Q-Exactive Orbitrap instrument equipped with a Dionex Ultimate 3000 (RSLC) inlet system, and electrospray (ESI) and atmospheric pressure chemical ionization (APCI) sources.

All titrations with different anions in the form of tetra-*n*-butylammonium ([n-Bu<sub>4</sub>N]<sup>+</sup> or TBA) salts were carried out using <sup>1</sup>H NMR spectroscopy on a Bruker Avance 400 MHz spectrometer at room temperature (293 K) unless otherwise noted. 0.5 mL of receptor solutions (~0.0298 M) were

prepared in NMR tubes and aliquots of concentrated salt solutions (0.2 mL, 7-10 eq) in screw-cap scintillation vials were prepared and added using micro-syringes. The titration started with 5  $\mu$ L of the salt's solution corresponding to 0.2 eq of the salt relative to host. Subsequent titrations were double checked and corroborated by integrating the  $[n\text{-Bu}_4\text{N}]^+$  protons relative to the host's protons. To determine the exact host:guest equivalence, relative integration of proton "e" (for host) and the methylene highlighted in  $[\text{N}(\text{CH}_2\text{CH}_2\text{CH}_2\text{CH}_3)_4]^+$  was carried out. Following the integration of these protons shows a 1:1 stoichiometry for all examined anions especially those with a strong binding constant (e.g., TBAMeSO<sub>3</sub> into **6**, see Figure S58, or TBAMeSO<sub>3</sub> into **4**, see Figure S64). The titration was stopped when the <sup>1</sup>H resonance of protons "a", "b<sub>in</sub>", and "b<sub>out</sub>" did not show any further shift. The <sup>1</sup>H NMR binding constant have been determined using Bindfit online software.<sup>2, 3</sup> NMR 1:1 fitting method with Nelder–Mead algorithm has been used for calculating the binding constants using non-linear regression method. The excel input files were prepared as follows: the first row has the headers, the first two columns are the host and guest concentrations, and the following three columns represents the proton resonances (in ppm) for protons "a", "b<sub>in</sub>", and "b<sub>out</sub>". The calculated errors are based on so-called "asymptotic standard error" at the 95% confidence interval level.

The titration of **7** with  $[n\text{-Bu}_4\text{N}][\text{PF}_6]$  (Figure S43), **6** with  $[n\text{-Bu}_4\text{N}][p\text{TsO}]$  (Figure S59-S60), and **8** with  $[n\text{-Bu}_4\text{N}][\text{MeSO}_3]$  (Figure S67) have shown a slow exchange on the <sup>1</sup>H NMR time scale (Table S4). In these cases, we used the <sup>1</sup>H NMR single-point method to determine the binding constant ( $K_a$ ) at different concentrations using eq. 1, where  $I(\text{HG})$  and  $I(\text{H})$  are the integrals of a specific proton in the host-guest adduct (HG) and free host (H), respectively, and  $c(\text{H})$  and  $c(\text{G})$  are the initial molar concentrations of host and guest, respectively.<sup>4</sup>

$$K_a = \frac{I(\text{HG})}{I(\text{H}) \left( c(\text{G}) - \frac{I(\text{HG})}{I(\text{H}) + I(\text{HG})} c(\text{H}) \right)} \quad \text{eq. 1}$$

Single crystal data for **1** – **8**, and adducts  $[n\text{-Bu}_4\text{N}][\text{MeSO}_3 \subset \text{host}]$ , for host = **4** and **6** – **8**, were collected on a Bruker X8 Prospector Ultra diffractometer equipped with an APEX II CCD detector and an I $\mu$ S microfocus Cu K $\alpha$  X-ray source ( $\lambda = 1.54178 \text{ \AA}$ ). Temperature was maintained using an Oxford

Cryosystem nitrogen flow apparatus. Single crystals suitable for X-ray structure analysis were coated with Paratone N-oil and mounted on MiTeGen Kapton loops (polyimide). Raw data was integrated and corrected for Lorentz and polarization effects using Bruker APEX3.<sup>5</sup> Absorption corrections were applied using SADABS.<sup>6</sup> Space group assignments were determined by examination of systematic absences, E-statistics, and successive refinement of the structures. The program PLATON<sup>7,8</sup> was employed to confirm the absence of higher symmetry for all crystals. The positions of the heavy atoms were determined using intrinsic phasing methods using the program SHELXT<sup>9</sup> and SHELXL<sup>10</sup> with Olex2<sup>11</sup> interface. Successive cycles of least-square refinement followed by difference Fourier syntheses revealed the positions of the remaining non-hydrogen atoms. Non-hydrogen atoms were refined with anisotropic displacement parameters, and hydrogen atoms were added in idealized positions. Crystallographic data for **1** – **8**, and adducts [*n*-Bu<sub>4</sub>N][MeSO<sub>3</sub> ⊂ host], for host = **4** and **6** – **8**, are given in Table S1.

**Synthetic details.** Compound **S1** was prepared according to literature procedures in large quantities (>30 g).<sup>1</sup>

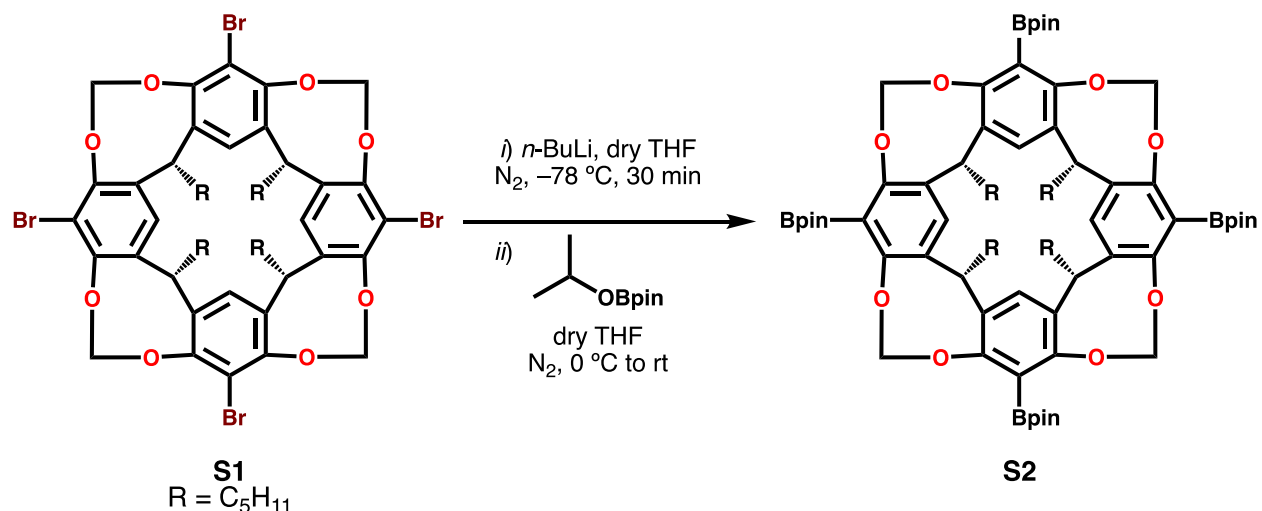

Compound **S2**. The synthesis of **S2** has been reported in the literature.<sup>12</sup> However, we have modified the synthetic procedure, as described next, increasing the overall product yield. A 250 mL Schlenk flask was loaded with **S1** (4.0 g, 3.53 mmol), sealed with rubber septum and dried at 80 °C for 4 h using high vacuum. The flask was filled with nitrogen and put under a nitrogen flow by placing a needle (0.7 mm×40 mm) through the rubber septum. Dry tetrahydrofuran (THF, 170 mL) was added through the rubber septum using another needle (0.9 mm× 40 mm). The resulting clear solution was cooled down to -78 °C using a dry ice/acetone bath. After stirring for 10 min at this temperature, *n*-butyllithium (1.6 M in hexanes, 9.24 mL, 14.83 mmol, 4.2 eq) was added dropwise over 5 min, and the mixture was stirred for an additional 0.5 h. The dry ice/acetone bath was replaced with ice/NaCl bath and the white cloudy mixture was stirred vigorously for 20 min. 2-isopropoxy-4,4,5,5-tetramethyl-1,3,2-dioxaborolane (10 mL, 53.74 mmol, 15.2 eq) was added dropwise in 5 min. After 30 min the ice/NaCl bath was removed, and the reaction mixture (clean solution) warmed to room temperature. Around 50 mL deionized water was added, and the mixture stirred vigorously for 20 min. The THF was removed under low pressure and the white solid was washed with copious amount of water and 200 mL of acetone to obtain the pure produce (white solid). Yield: 73% (3.40 g, 2.57 mmol). Spectral characterization is in agreement with previous literature.<sup>1</sup>

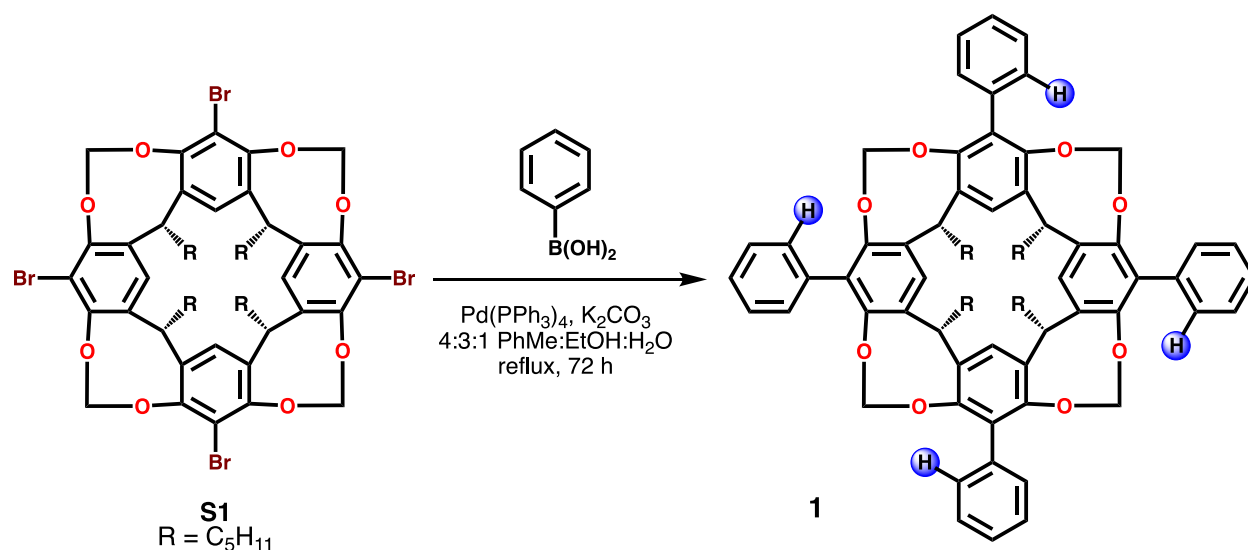

*Red dotted line defines the C-C<sub>square</sub> distances in all fluorocages:*

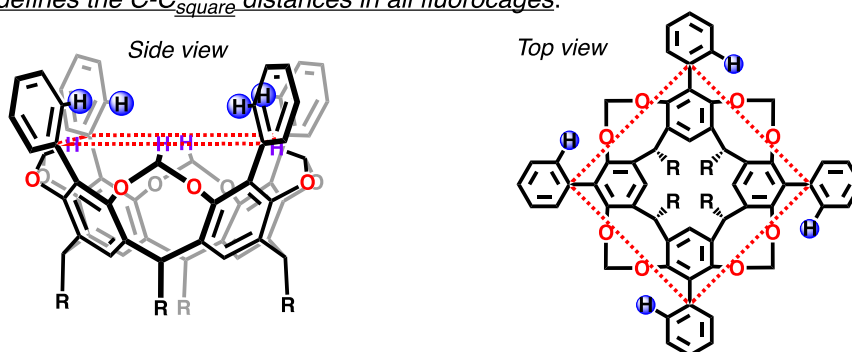

Compound **1**. To a 250 mL Schlenk flask containing **S1** (1.00 g, 0.88 mmol) we added phenylboronic acid (0.53 g, 4.41 mmol, 5 eq),  $\text{K}_2\text{CO}_3$  (3 g, 21.7 mmol, 24.7 eq), and a mixed solvent of toluene, ethanol, and water (40/30/10, mL/mL/mL). The reaction mixture was degassed for 15 min while stirring vigorously at room temperature. To this mixture, 0.4 g of  $\text{Pd(PPh}_3)_4$  (0.32 mmol, 0.36 eq) was added. This amount of catalyst forms 4 C-C bonds, thus representing ~9 mol% for each bond formation. The solution was degassed again for an additional 15 min while gradually increasing the temperature to reflux. The reaction mixture was left at reflux and under  $\text{N}_2$  atmosphere for three days after which the solvents were removed under reduced pressure. The crude product was purified by column chromatography using DCM/Hexanes (50-60%, v/v) giving a white solid. Yield: 53% (0.53 g, 0.48 mmol). Melting point = 258-260 °C. High quality crystals of **1** were grown by slow evaporation of a DCM/MeCN solution.

$^1\text{H}$  NMR (400 MHz,  $\text{CDCl}_3$ ):  $\delta$  7.34-7.29 (m, 3H), 7.26-7.22 (m, 1H), 7.03 (d, 2H,  $J = 7.2$  Hz), 5.20 (d, 1H,  $J = 6.8$  Hz), 4.87 (t, 1H,  $J = 7.0$  Hz), 4.23 (d, 1H,  $J = 7.0$  Hz), 2.37 (q, 2H,  $J = 6.4$  Hz), 1.50-1.38 (m, 6H), and 0.96 (t, 3H,  $J = 7.1$  Hz).

$^{13}\text{C}$  NMR (100 MHz,  $\text{CDCl}_3$ ):  $\delta$  152.7, 138.5, 134.2, 130.0, 129.5, 128.0, 127.2, 120.0, 100.7, 37.3, 32.2, 30.6, 27.8, 22.9, and 14.3 ppm.

$\text{C}_{76}\text{H}_{80}\text{O}_8$ , HRMS  $[\text{M}+\text{H}]^+$  calc.: 1121.5926; exp.: 1121.5900.

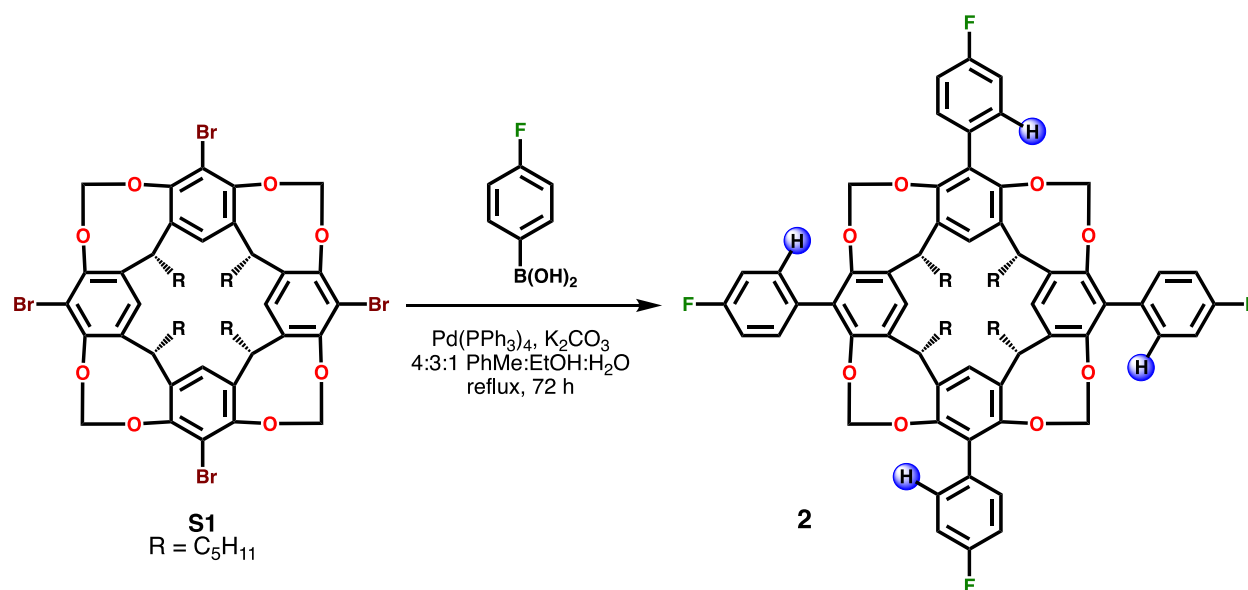

Compound **2**. To a 250 mL Schlenk flask containing **S1** (1.00 g, 0.88 mmol) we added 4-fluorophenylboronic acid (0.68 g, 4.84 mmol, 5.5 eq),  $\text{K}_2\text{CO}_3$  (3 g, 21.7 mmol, 24.7 eq), and a mixed solvent of toluene, ethanol, and water (40/30/10, mL/mL/mL). The reaction mixture was degassed for 15 min while stirring vigorously at room temperature. To this mixture, 0.4 g of  $\text{Pd}(\text{PPh}_3)_4$  (0.32 mmol, 0.36 eq) was added. This amount of catalyst forms 4 C-C bonds, thus representing  $\sim 9$  mol% for each bond formation. The solution was degassed again for an additional 15 min while gradually increasing the temperature to reflux. The reaction mixture was left at reflux and under  $\text{N}_2$  atmosphere for three days after which the solvents were removed under reduced pressure. The crude product was further purified by column chromatography using DCM/Hexanes (40-50%, v/v) giving a white solid. Yield: 46% (0.48 g, 0.40 mmol). Melting point =  $>260$   $^\circ\text{C}$  (exceeded measurable range). High quality crystals of **2** were grown by slow evaporation of a DCM/MeCN solution.

$^1\text{H}$  NMR (400 MHz,  $\text{CDCl}_3$ ):  $\delta$  7.31 (s, 1H), 7.05-6.98 (m, 4H), 5.25 (d, 1H,  $J = 6.8$  Hz), 4.83 (t, 1H,  $J = 8.0$  Hz), 4.19 (d, 1H,  $J = 7.0$  Hz), 2.33 (q, 2H,  $J = 6.6$  Hz), 1.49-1.35 (m, 6H), and 0.95 (t, 3H,  $J = 7.1$  Hz).

$^{13}\text{C}$  NMR (100 MHz,  $\text{CDCl}_3$ )  $\delta$  163.3, 160.8, 152.7, 138.5, 131.6, 131.6, 129.8, 129.8, 128.5, 120.1, 115.2, 115.0, 100.6, 32.2, 30.5, 27.8, 22.9, and 14.3 ppm.

$^{19}\text{F}$  NMR (376 MHz,  $\text{CDCl}_3$ ):  $\delta$  -114.91 ppm.

$\text{C}_{76}\text{H}_{76}\text{O}_8\text{F}_4$ , HRMS  $[\text{M}+\text{H}]^+$  calc.: 1193.5549; exp.: 1193.5532.

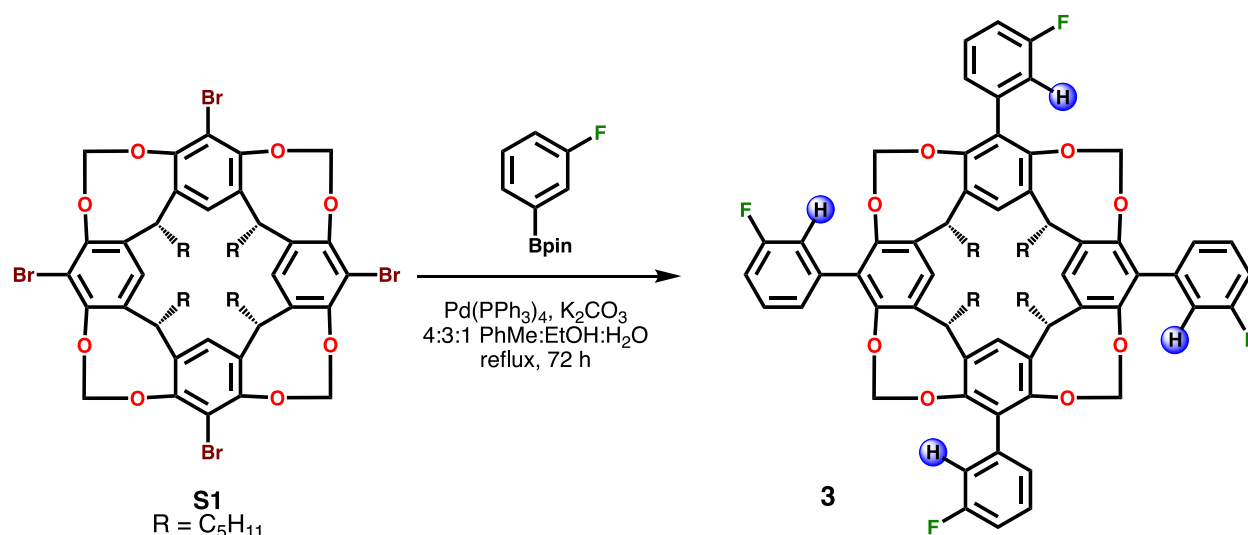

**Compound 3.** To a 250 mL Schlenk flask containing **S1** (1.00 g, 0.88 mmol) we added 3-fluorophenylboronic acid pinacol ester (1.17 g, 5.28 mmol, 6 eq),  $\text{K}_2\text{CO}_3$  (3 g, 21.7 mmol, 24.7 eq), and a mixed solvent of toluene, ethanol, and water (40/30/10, mL/mL/mL). The reaction mixture was degassed for 15 min while stirring vigorously at room temperature. To this mixture, 0.4 g of  $\text{Pd}(\text{PPh}_3)_4$  (0.32 mmol, 0.36 eq) was added. This amount of catalyst forms 4 C-C bonds, thus representing ~9 mol% for each bond formation. The solution was degassed again for an additional 15 min while gradually increasing the temperature to reflux. The reaction mixture was left at reflux and under  $\text{N}_2$  atmosphere for three days after which the solvents were removed under reduced pressure. The crude product was further purified by column chromatography using DCM/Hexanes (50%, v/v) giving a white solid. Yield: 38% (0.40 g, 0.33 mmol). Melting point = 249-251  $^\circ\text{C}$ . High quality crystals of **3** were grown by slow evaporation of a DCM/MeCN solution.



$^1\text{H}$  NMR (400 MHz,  $\text{CDCl}_3$ ):  $\delta$  7.35 (s, 1H), 7.30 (m, 1H), 6.99 (dt, 1H,  $J = 2.1$  Hz and  $J = 8.4$  Hz), 6.80 (t, 2H,  $J = 7.7$  Hz), 5.26 (d, 1H,  $J = 6.9$  Hz), 4.85 (t, 1H,  $J = 8.1$  Hz), 4.20 (d, 1H,  $J = 7.0$  Hz), 2.35 (q, 2H,  $J = 6.5$  Hz), 1.50-1.36 (m, 6H), and 0.94 (t, 3H,  $J = 7.1$  Hz).

$^{13}\text{C}$  NMR (100 MHz,  $\text{CDCl}_3$ )  $\delta$  163.7, 161.3, 152.6, 138.5, 136.3, 136.2, 129.6, 129.5, 128.5, 125.6, 120.4, 117.2, 117.0, 114.5, 114.5, 100.6, 37.2, 32.2, 30.5, 27.8, 22.9, and 14.3.

$^{19}\text{F}$  NMR (376 MHz,  $\text{CDCl}_3$ ):  $\delta$  -113.45 ppm.

$\text{C}_{76}\text{H}_{76}\text{O}_8\text{F}_4$ , HRMS  $[\text{M}+\text{H}]^+$  calc.: 1193.5549; exp.: 1193.5528.

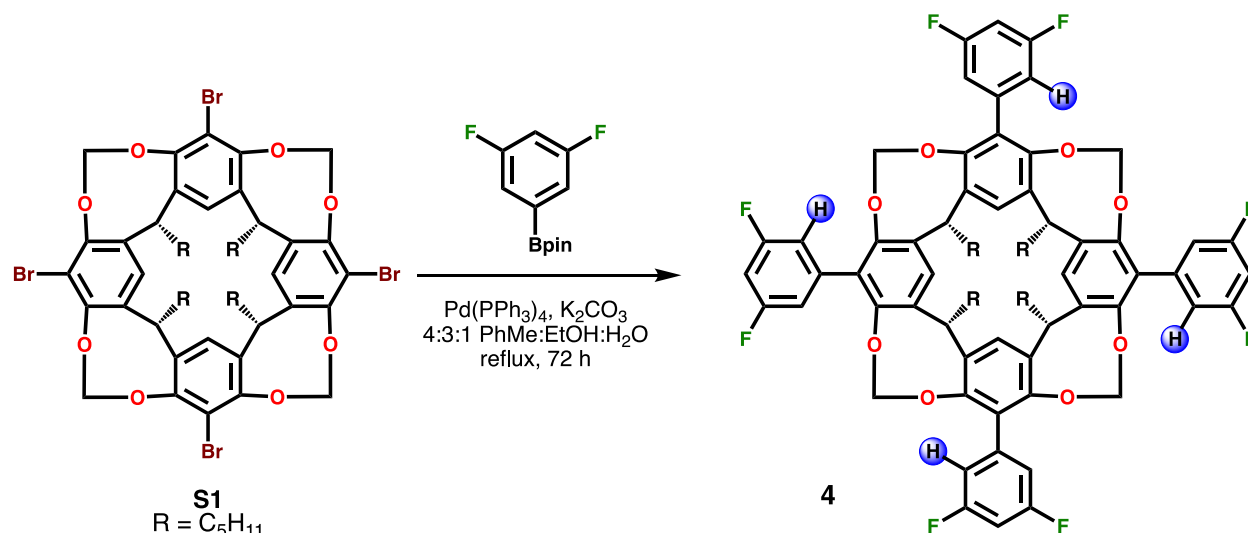

**Compound 4.** To a 250 mL Schlenk flask containing **S1** (1.00 g, 0.88 mmol) we added 3,5-difluorophenylboronic acid pinacol ester (1.27 g, 5.28 mmol, 6 eq),  $\text{K}_2\text{CO}_3$  (3 g, 21.7 mmol, 24.7 eq), and a mixed solvent of toluene, ethanol, and water (40/30/10, mL/mL/mL). The reaction mixture was degassed for 15 min while stirring vigorously at room temperature. To this mixture, 0.4 g of  $\text{Pd}(\text{PPh}_3)_4$  (0.32 mmol, 0.36 eq) was added. This amount of catalyst forms 4 C-C bonds, thus representing ~9 mol% for each bond formation. The solution was degassed again for an additional 15 min while gradually increasing the temperature to reflux. The reaction mixture was left at reflux and under  $\text{N}_2$  atmosphere for three days after which the solvents were removed under reduced pressure. The crude product was further purified by column chromatography using DCM/Hexanes (50%, v/v) giving a white solid. Yield: 42% (0.47 g, 0.37 mmol). Melting point =  $>260$  °C (exceeded measurable range). High quality crystals of **4** were grown by slow evaporation of a DCM/MeCN solution.

$^1\text{H}$  NMR (400 MHz,  $\text{CDCl}_3$ ):  $\delta$  7.34 (s, 1H), 6.68 (b, 1H), 6.56 (d, 2H,  $J = 7.8$  Hz), 5.30 (d, 1H,  $J = 6.8$  Hz), 4.83 (t, 1H,  $J = 8.1$  Hz), 4.13 (d, 1H,  $J = 7.0$  Hz), 2.33 (q, 2H,  $J = 6.5$  Hz), 1.49-1.36 (m, 6H), and 0.95 (t, 3H,  $J = 7.1$  Hz).

$^{13}\text{C}$  NMR (100 MHz,  $\text{CDCl}_3$ )  $\delta$  163.9, 163.7, 161.4, 161.3, 152.4, 138.7, 137.3, 137.2, 137.1, 127.8, 120.8, 113.1, 112.9, 103.1, 103.0, 102.8, 100.6, 37.1, 32.2, 30.4, 27.8, 22.9, and 14.3 ppm.

$^{19}\text{F}$  NMR (376 MHz,  $\text{CDCl}_3$ ):  $\delta$  -110.27 ppm.

$\text{C}_{76}\text{H}_{72}\text{O}_8\text{F}_8$ , HRMS  $[\text{M}+\text{H}]^+$  calc.: 1265.5172; exp.: 1265.5130.

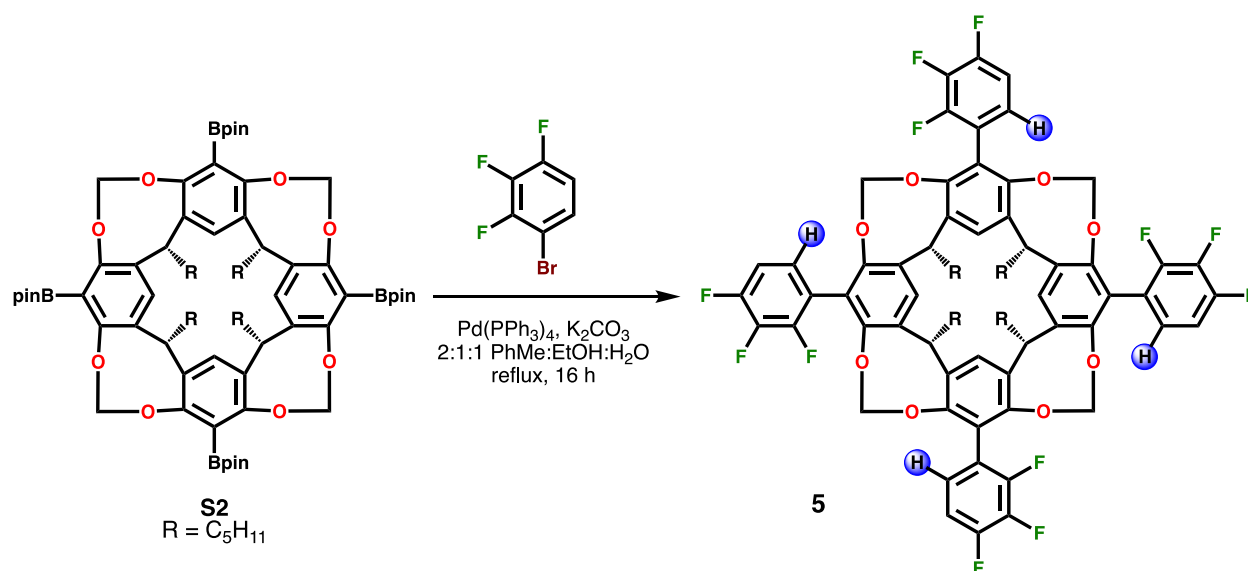

Compound **5**. To a 250 mL Schlenk flask containing **S2** (0.5 g, 0.38 mmol) we added 1-bromo-2,3,4-trifluorobenzene (0.4 g, 1.9 mmol, 5 eq),  $\text{K}_2\text{CO}_3$  (1.5 g, 10.8 mmol, 28.4 eq), and a mixed solvent of toluene, ethanol, and water (40/20/20, mL/mL/mL). The reaction mixture was degassed for 15 min while stirring vigorously at room temperature. To this mixture, 0.2 g of  $\text{Pd}(\text{PPh}_3)_4$  (0.16 mmol, 0.47 eq) was added. This amount of catalyst forms 4 C-C bonds, thus representing ~0.12 mol% for each bond formation. The solution was degassed again for an additional 15 min while gradually increasing the temperature to reflux. The reaction mixture was left at reflux and under  $\text{N}_2$  atmosphere for 16 h after which the solvents were removed under reduced pressure. The crude product was further purified by column chromatography using DCM/Hexanes (50%, v/v) giving a white solid. Yield: 43% (0.22 g, 0.16 mmol). Melting point =  $>260$  °C (exceeded measurable range). High quality crystals of **5** were grown by slow evaporation of a DCM/MeCN solution.

$^1\text{H}$  NMR (400 MHz,  $\text{CDCl}_3$ ):  $\delta$  7.37 (s, 1H), 6.90 (b, 1H), 6.52 (b, 0.4), 5.21 (b, 1H), 4.81 (b, 1H), 4.13 (b, 1H), 2.34 (b, 2H), 1.45 (b, 6H), and 0.95 (t, 3H,  $J = 6.9$  Hz).

$^{13}\text{C}$  NMR (100 MHz,  $\text{CDCl}_3$ )  $\delta$  37.1, 32.2, 30.4, 27.7, 22.8, 14.3, and several multiplets in 100-160 ppm.

$^{19}\text{F}$  NMR (376 MHz,  $\text{CDCl}_3$ ):  $\delta$  -159.05 to -160.57 (m), and -136.09 to -131.40 (m) ppm.

$\text{C}_{76}\text{H}_{68}\text{O}_8\text{F}_{12}$ , HRMS  $[\text{M}+\text{H}]^+$  calc.: 1337.4795; exp.: 1337.4810.

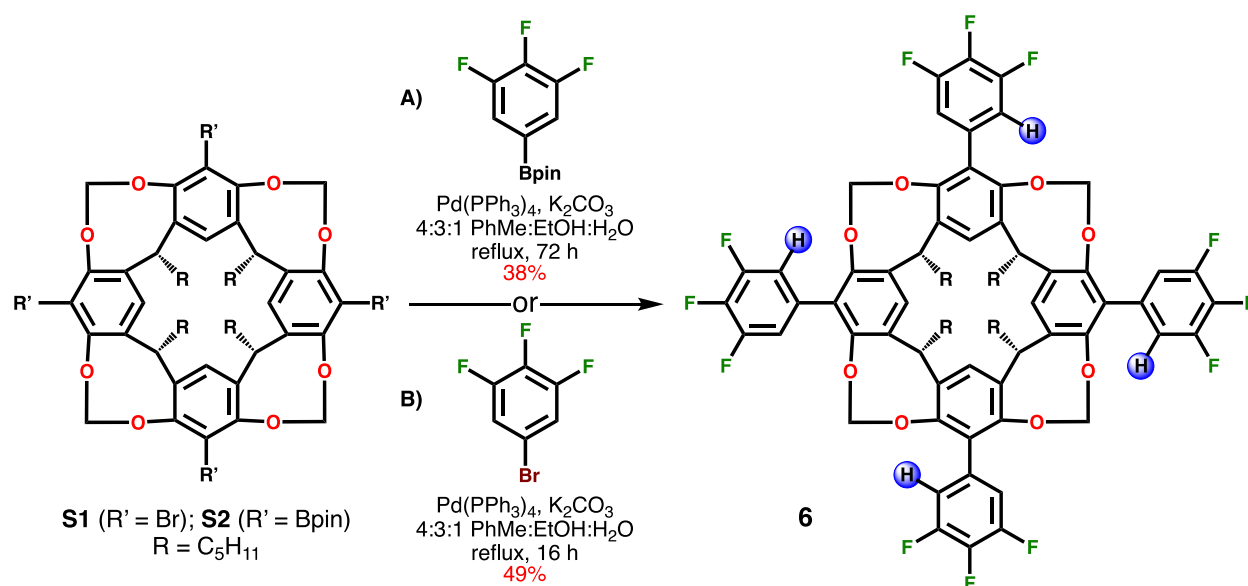

**Compound 6 (Method A).** To a 250 mL Schlenk flask containing **S1** (1.00 g, 0.88 mmol) we added 3,4,5-trifluorophenylboronic acid pinacol ester (1.83 g, 7.04 mmol, 8 eq),  $\text{K}_2\text{CO}_3$  (3 g, 21.7 mmol, 24.7 eq), and a mixed solvent of toluene, ethanol, and water (40/30/10, mL/mL/mL). The reaction mixture was degassed for 15 min while stirring vigorously at room temperature. To this mixture, 0.4 g of  $\text{Pd}(\text{PPh}_3)_4$  (0.32 mmol, 0.36 eq) was added. This amount of catalyst forms 4 C-C bonds, thus representing ~9 mol% for each bond formation. The solution was degassed again for an additional 15 min while gradually increasing the temperature to reflux. The reaction mixture was left at reflux and under  $\text{N}_2$  atmosphere for three days after which the solvents were removed under reduced pressure. The crude product was further purified by column chromatography using DCM/Hexanes (50%, v/v) giving a white solid. Yield: 38% (0.45 g, 0.34 mmol). Melting point =  $>260$  °C (exceeded measurable range). High quality crystals of **6** were grown by slow evaporation of a DCM/MeCN solution.

Compound **6** (**Method B**). To a 250 mL Schlenk flask containing **S2** (1.5 g, 1.14 mmol) we added 1-bromo-3,4,5-trifluorobenzene (1.92 g, 9.1 mmol, 8 eq),  $K_2CO_3$  (3 g, 21.7 mmol, 19 eq), and a mixed solvent of toluene, ethanol, and water (40/30/10, mL/mL/mL). The reaction mixture was degassed for 15 min while stirring vigorously at room temperature. To this mixture, 0.5 g of  $Pd(PPh_3)_4$  (0.43 mmol, 0.38 eq) was added. This amount of catalyst forms 4 C-C bonds, thus representing ~9 mol% for each bond formation. The solution was degassed again for an additional 15 min while gradually increasing the temperature to reflux. The reaction mixture was left at reflux and under  $N_2$  atmosphere for 16 h after which the solvents were removed under reduced pressure. The crude product was further purified by column chromatography using DCM/ Hexanes (50%, v/v) giving a white solid. Yield: 49% (0.74 g, 0.55 mmol).

$^1H$  NMR (400 MHz,  $CDCl_3$ ):  $\delta$  7.35 (s, 1H), 6.61 (b, 1H), 5.35 (d, 1H,  $J = 6.6$  Hz), 4.85 (t, 1H,  $J = 8.0$  Hz), 4.08 (d, 1H,  $J = 7.0$  Hz), 2.34 (q, 2H,  $J = 6.4$  Hz), 1.50-1.39 (m, 6H), and 0.97 (t, 3H,  $J = 7.1$  Hz).

$^{13}C$  NMR (100 MHz,  $CDCl_3$ )  $\delta$  152.4, 151.6, 149.9, 139.7, 138.9, 138.0, 130.1, 127.3, 121.0, 114.3, 100.5, 37.2, 32.1, 30.3, 27.8, 22.9, and 14.3 ppm.

$^{19}F$  NMR (376 MHz,  $CDCl_3$ ):  $\delta$  -135.46 (d), and -162.93 (t).

$C_{76}H_{68}O_8F_{12}$ , HRMS  $[M+H]^+$  calc.: 1337.4795; exp.: 1337.4752.

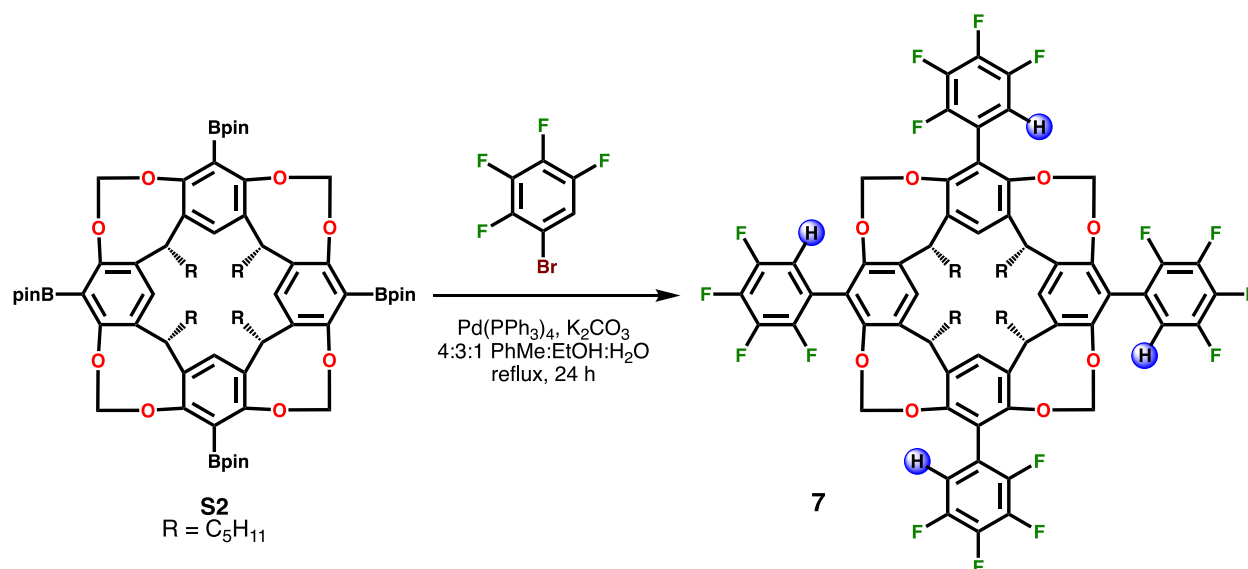

Compound **7**. To a 250 mL Schlenk flask containing **S2** (0.5 g, 0.37 mmol) we added 1-bromo-2,3,4,5-tetrafluorobenzene (0.52 g, 2.27 mmol, 6 eq),  $K_2CO_3$  (1.5 g, 10.8 mmol, 29 eq), and a

mixed solvent of toluene, ethanol, and water (40/30/10, mL/mL/mL). The reaction mixture was degassed for 15 min while stirring vigorously at room temperature. To this mixture, 0.2 g of Pd(PPh<sub>3</sub>)<sub>4</sub> (0.17 mmol, 0.46 eq) was added. This amount of catalyst forms 4 C-C bonds, thus representing ~11 mol% for each bond formation. The solution was degassed again for an additional 15 min while gradually increasing the temperature to reflux. The reaction mixture was left at reflux and under N<sub>2</sub> atmosphere for 24 h after which the solvents were removed under reduced pressure. The crude product was further purified by column chromatography using DCM/Hexanes (50%, v/v) giving a white solid. Yield: 53% (0.28 g, 0.20 mmol). Melting point = >260 °C (exceeded measurable range). High quality crystals of **7** were grown by slow evaporation of a DCM/MeCN solution.

<sup>1</sup>H NMR (400 MHz, CDCl<sub>3</sub>): δ 7.28 (s, 1H), 6.71 (b, 0.72H), 6.39 (b, 0.3), 5.19 (b, 1H), 4.71 (b, 1H), 4.06 (b, 1H), 2.24 (b, 2H), 1.32 (b, 6H), and 0.85 (t, 3H, J = 7.1 Hz).

<sup>13</sup>C NMR (100 MHz, CDCl<sub>3</sub>) δ 37.1, 32.2, 30.3, 27.7, 22.8, 14.3, and several multiplets in 100-160 ppm.

<sup>19</sup>F NMR (376 MHz, CDCl<sub>3</sub>): δ -156.01 to -154.65 (m) and -140.86 to -136.03 (m) ppm.

C<sub>76</sub>H<sub>64</sub>O<sub>8</sub>F<sub>16</sub>, HRMS [M+H]<sup>+</sup> calc.: 1409.4419; exp.: 1409.4417.

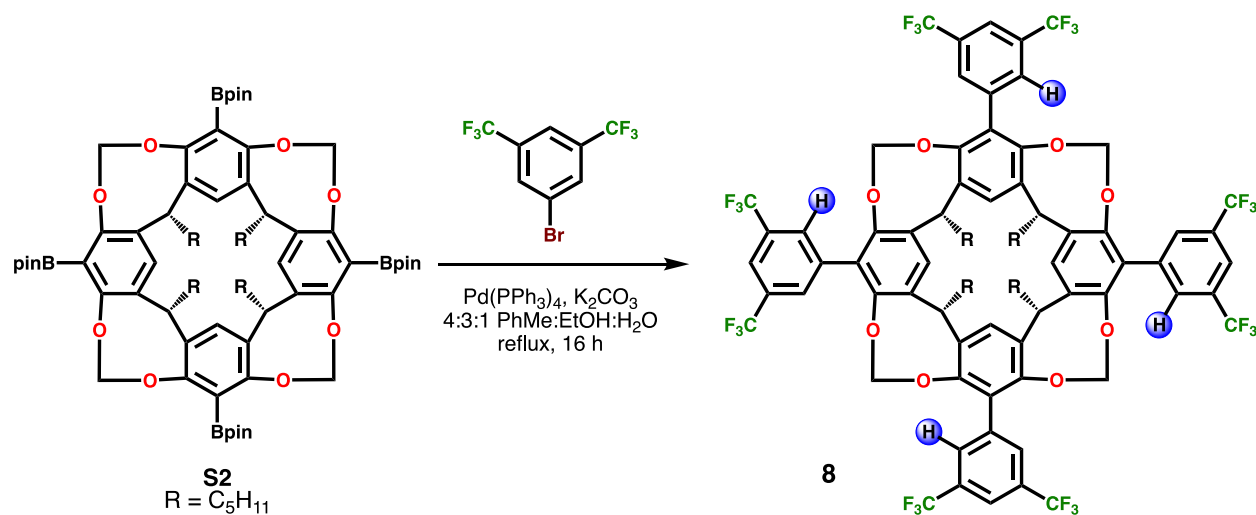

Compound **8**. To a 250 mL Schlenk flask containing **S2** (1.0 g, 0.75 mmol) we added 1-bromo-3,5-bis(trifluoromethyl)benzene (1.32 g, 4.5 mmol, 6 eq), K<sub>2</sub>CO<sub>3</sub> (3 g, 21.7 mmol, 28.9 eq), and a mixed solvent of toluene, ethanol, and water (40/30/10, mL/mL/mL). The reaction mixture was degassed for

15 min while stirring vigorously at room temperature. To this mixture, 0.4 g of Pd(PPh<sub>3</sub>)<sub>4</sub> (0.34 mmol, 0.46 eq) was added. This amount of catalyst forms 4 C-C bonds, thus representing ~11 mol% for each bond formation. The solution was degassed again for an additional 15 min while gradually increasing the temperature to reflux. The reaction mixture was left at reflux and under N<sub>2</sub> atmosphere for 16 h after which the solvents were removed under reduced pressure. The crude product was further purified by column chromatography using DCM/Hexanes (20%, v/v) giving a white solid. Yield: 46% (0.58 g, 0.35 mmol). Melting point = >260 °C (exceeded measurable range). High quality crystals of **8** were grown by slow evaporation of a DCM/MeCN solution.

<sup>1</sup>H NMR (400 MHz, CDCl<sub>3</sub>): δ 7.83 (s, 1H), 7.53 (s, 2H), 7.44 (s, 1H), 5.33 (d, 1H, *J* = 6.8 Hz), 4.88 (t, 1H, *J* = 8.0 Hz), 4.29 (d, 1H, *J* = 6.9 Hz), 2.38 (q, 2H, *J* = 6.6 Hz), 1.52-1.38 (m, 6H), and 0.98 (t, 3H, *J* = 7.1 Hz).

<sup>13</sup>C NMR (100 MHz, CDCl<sub>3</sub>): δ 152.6, 139.0, 135.7, 132.1, 131.8, 131.4, 131.1, 130.4, 127.3, 126.7, 124.6, 121.9, 121.6, 121.4, 119.2, 100.6, 37.4, 32.2, 30.5, 27.8, 22.9, and 14.3 ppm.

<sup>19</sup>F NMR (376 MHz, CDCl<sub>3</sub>): δ -62.94 ppm.

C<sub>92</sub>H<sub>108</sub>N<sub>4</sub>O<sub>20</sub>, HRMS [M+H]<sup>+</sup> calc.: 1825.7423; exp.: multiple attempts were carried out, however none of them was successful.

### Isolated host-guest adducts

Compound [*n*-Bu<sub>4</sub>N][MeSO<sub>3</sub> C **4**]

15 mg of compound **4** in 0.5 mL of CDCl<sub>3</sub> were titrated with [*n*-Bu<sub>4</sub>N][MeSO<sub>3</sub>] up to ~1.1 eq. This solution was transferred to a 20 mL vial. The NMR tube was rinsed with 5-7 mL of DCM, which was combined with the initial solution. Additionally, around 4-5 mL of MeCN were added to the latter solution. The vial was left aside for slow solvent evaporation. Colorless crystals were formed within 12-16 hours.

Compound [*n*-Bu<sub>4</sub>N][MeSO<sub>3</sub>⊂**6**]

15 mg of compound **6** in 0.5 mL of CDCl<sub>3</sub> were titrated with [*n*-Bu<sub>4</sub>N][MeSO<sub>3</sub>] up to ~1.1 eq. This solution was transferred to a 20 mL vial. The NMR tube was rinsed with 5-7 mL of DCM, which was combined with the initial solution. Additionally, around 4-5 mL of MeCN were added to the latter solution. The vial was left aside for slow solvent evaporation. Colorless crystals were formed within 12-16 hours.

Compound [*n*-Bu<sub>4</sub>N][MeSO<sub>3</sub>⊂**7**].

15 mg of compound **7** in 0.5 mL of CDCl<sub>3</sub> were titrated with [*n*-Bu<sub>4</sub>N][MeSO<sub>3</sub>] up to ~1.2 eq. This solution was transferred to a 20 mL vial. The NMR tube was rinsed with 5-7 mL of DCM, which was combined with the initial solution. Additionally, around 4-5 mL of MeCN were added to the latter solution. The vial was left aside for slow solvent evaporation. Colorless crystals were formed within 12-16 hours.

Compound [*n*-Bu<sub>4</sub>N][MeSO<sub>3</sub>⊂**8**].

15 mg of compound **8** in 0.5 mL of CDCl<sub>3</sub> were titrated with [*n*-Bu<sub>4</sub>N][MeSO<sub>3</sub>] up to ~4.2 eq. This solution was transferred to a 20 mL vial. The NMR tube was rinsed with 5-7 mL of DCM, which was combined with the initial solution. Additionally, around 4-5 mL of MeCN were added to the latter solution. The vial was left aside for slow solvent evaporation. Colorless crystals were formed within 12-16 hours.

**Computational details.** All calculations were carried out using Gaussian 16 software package.<sup>13</sup> The M06-2X<sup>14</sup> functional was used for all optimizations and subsequent studies. The frequency calculations were carried out for all optimized structures to ensure the absence of any imaginary frequencies for the ground state molecules. The intrinsic reaction coordinate (IRC) calculation is carried out, in addition to the presence of one imaginary frequency, for the transition state structures. The double-zeta quality basis set (6-31+G(d,p)) was used for all calculations. For the sake of accuracy, the single point energies were calculated using 6-311++G(3df,2p) basis set. The implicit solvation effects were included using the CPCM solvation model with standard parameters of chloroform (CHCl<sub>3</sub>) and dimethyl sulfoxide (DMSO).<sup>15, 16</sup> This method [M062X/6-311++G(3df,2p)+CPCM(solvent)//M062X/6-31+G(d,p)] showed reliable results in the previous study.<sup>17</sup> The quantitative charge distributions are calculated using Hirshfeld method at 6-31+G(d,p) level.<sup>18</sup> This method showed the lowest basis set dependency for population analysis.<sup>19</sup>



**Table S1.** Crystallographic data for compounds **1** – **8**, and [MeSO<sub>3</sub>]<sup>−</sup> adducts with **4** and **6** – **8**.

|                                                       | <b>1</b>                                                                              | <b>2</b>                                                                                             | <b>3</b>                                                                                             | <b>4</b>                                                                                                                                     |
|-------------------------------------------------------|---------------------------------------------------------------------------------------|------------------------------------------------------------------------------------------------------|------------------------------------------------------------------------------------------------------|----------------------------------------------------------------------------------------------------------------------------------------------|
| <b>CCDC Number</b>                                    | 2104071                                                                               | 2104070                                                                                              | 2104074                                                                                              | 2104072                                                                                                                                      |
| <b>Chemical formula</b>                               | C <sub>76</sub> H <sub>80</sub> O <sub>8</sub><br>·3(C <sub>2</sub> H <sub>3</sub> N) | C <sub>76</sub> H <sub>76</sub> F <sub>4</sub> O <sub>8</sub><br>·3(C <sub>2</sub> H <sub>3</sub> N) | C <sub>76</sub> H <sub>76</sub> F <sub>4</sub> O <sub>8</sub><br>·3(C <sub>2</sub> H <sub>3</sub> N) | C <sub>76</sub> H <sub>72</sub> F <sub>8</sub> O <sub>8</sub><br>·2(C <sub>2</sub> H <sub>3</sub> N)<br>·2(CH <sub>2</sub> Cl <sub>2</sub> ) |
| <b>Formula weight</b>                                 | 1244.56                                                                               | 1316.52                                                                                              | 1316.52                                                                                              | 1517.29                                                                                                                                      |
| <b>Space group</b>                                    | <i>P</i> − <i>1</i>                                                                   | <i>P</i> − <i>1</i>                                                                                  | <i>P</i> − <i>1</i>                                                                                  | <i>C</i> 2/ <i>c</i>                                                                                                                         |
| <b><i>a</i> (Å)</b>                                   | 11.9327(3)                                                                            | 11.969 (4)                                                                                           | 11.9504(3)                                                                                           | 33.1351(6)                                                                                                                                   |
| <b><i>b</i> (Å)</b>                                   | 12.8148(3)                                                                            | 12.961(3)                                                                                            | 12.9188(3)                                                                                           | 12.8854(2)                                                                                                                                   |
| <b><i>c</i> (Å)</b>                                   | 24.0608(5)                                                                            | 24.112(4)                                                                                            | 24.0391(7)                                                                                           | 23.6066(7)                                                                                                                                   |
| <b><i>α</i> (deg)</b>                                 | 100.145(1)                                                                            | 101.319(7)                                                                                           | 99.832(1)                                                                                            | 90                                                                                                                                           |
| <b><i>β</i> (deg)</b>                                 | 96.381(1)                                                                             | 91.758(13)                                                                                           | 96.529(1)                                                                                            | 131.764(1)                                                                                                                                   |
| <b><i>γ</i> (deg)</b>                                 | 102.831(1)                                                                            | 101.826(14)                                                                                          | 101.954(1)                                                                                           | 90                                                                                                                                           |
| <b><i>V</i> (Å<sup>3</sup>)</b>                       | 3487.76(14)                                                                           | 3580.1(14)                                                                                           | 3534.42(16)                                                                                          | 7517.9(3)                                                                                                                                    |
| <b><i>Z</i></b>                                       | 2                                                                                     | 2                                                                                                    | 2                                                                                                    | 4                                                                                                                                            |
| <b><i>μ</i> (mm<sup>−1</sup>)</b>                     | 0.60                                                                                  | 0.69                                                                                                 | 0.70                                                                                                 | 2.08                                                                                                                                         |
| <b>T (K)</b>                                          | 220                                                                                   | 150                                                                                                  | 220                                                                                                  | 230                                                                                                                                          |
| <b><i>R</i>1<sup>a</sup> (<i>wR</i>2<sup>b</sup>)</b> | 0.154 (0.505)                                                                         | 0.119 (0.382)                                                                                        | 0.098 (0.282)                                                                                        | 0.133 (0.448)                                                                                                                                |
| <b>Reflections</b>                                    | 10814                                                                                 | 12398                                                                                                | 10927                                                                                                | 7100                                                                                                                                         |
| <b>Radiation type</b>                                 | Cu <i>Kα</i>                                                                          | Cu <i>Kα</i>                                                                                         | Cu <i>Kα</i>                                                                                         | Cu <i>Kα</i>                                                                                                                                 |

$${}^aR1 = [\sum w(F_o - F_c)^2 / \sum w F_o^2]^{1/2}; {}^b wR2 = [\sum [w(F_o^2 - F_c^2)^2] / \sum w(F_o^2)^2]^{1/2}, w = 1/[\sigma^2(F_o^2) + (aP)^2 + bP], \text{ where } P = [\max(F_o^2, 0) + 2(F_c^2)]/3$$

Table S1. Continued...

|                                                       | 5                                                                                                     | 6                                                                                                                                                                        | 7                                                              | 8                                                                                                     |
|-------------------------------------------------------|-------------------------------------------------------------------------------------------------------|--------------------------------------------------------------------------------------------------------------------------------------------------------------------------|----------------------------------------------------------------|-------------------------------------------------------------------------------------------------------|
| <b>CCDC Number</b>                                    | 2104075                                                                                               | 2104076                                                                                                                                                                  | 2104073                                                        | 2104069                                                                                               |
| <b>Chemical formula</b>                               | C <sub>76</sub> H <sub>68</sub> F <sub>12</sub> O <sub>8</sub><br>·4(C <sub>2</sub> H <sub>3</sub> N) | C <sub>75</sub> H <sub>66</sub> F <sub>12</sub> O <sub>8</sub><br>·C <sub>76</sub> H <sub>68</sub> F <sub>12</sub> O <sub>8</sub><br>·2(C <sub>2</sub> H <sub>3</sub> N) | C <sub>68</sub> H <sub>48</sub> F <sub>16</sub> O <sub>8</sub> | C <sub>84</sub> H <sub>72</sub> F <sub>24</sub> O <sub>8</sub><br>·3(C <sub>2</sub> H <sub>3</sub> N) |
| <b>Formula weight</b>                                 | 1501.52                                                                                               | 2742.68                                                                                                                                                                  | 1297.06                                                        | 1788.11                                                                                               |
| <b>Space group</b>                                    | <i>P-1</i>                                                                                            | <i>P2<sub>1</sub>/c</i>                                                                                                                                                  | <i>Fddd</i>                                                    | <i>P2<sub>1</sub>/c</i>                                                                               |
| <b><i>a</i> (Å)</b>                                   | 12.0029(7)                                                                                            | 22.7987(9)                                                                                                                                                               | 28.0557(13)                                                    | 21.8730(5)                                                                                            |
| <b><i>b</i> (Å)</b>                                   | 12.9090(7)                                                                                            | 33.3050(13)                                                                                                                                                              | 31.8586(13)                                                    | 15.4168(3)                                                                                            |
| <b><i>c</i> (Å)</b>                                   | 25.4812(14)                                                                                           | 21.4220(8)                                                                                                                                                               | 36.4490(12)                                                    | 27.7277(6)                                                                                            |
| <b><i>α</i> (deg)</b>                                 | 78.324(3)                                                                                             | 90                                                                                                                                                                       | 90                                                             | 90                                                                                                    |
| <b><i>β</i> (deg)</b>                                 | 77.909(3)                                                                                             | 94.928(2)                                                                                                                                                                | 90                                                             | 113.23                                                                                                |
| <b><i>γ</i> (deg)</b>                                 | 79.550(3)                                                                                             | 90                                                                                                                                                                       | 90                                                             | 90                                                                                                    |
| <b><i>V</i> (Å<sup>3</sup>)</b>                       | 3740.7(4)                                                                                             | 16205.8(11)                                                                                                                                                              | 32579(2)                                                       | 8592.1(3)                                                                                             |
| <b><i>Z</i></b>                                       | 2                                                                                                     | 4                                                                                                                                                                        | 16                                                             | 4                                                                                                     |
| <b><i>μ</i> (mm<sup>-1</sup>)</b>                     | 0.89                                                                                                  | 0.77                                                                                                                                                                     | 0.81                                                           | 1.07                                                                                                  |
| <b>T (K)</b>                                          | 210                                                                                                   | 200                                                                                                                                                                      | 220                                                            | 210                                                                                                   |
| <b><i>R</i>1<sup>a</sup> (<i>wR</i>2<sup>b</sup>)</b> | 0.160 (0.495)                                                                                         | 0.207 (0.575)                                                                                                                                                            | 0.252 (0.658)                                                  | 0.188 (0.489)                                                                                         |
| <b>Reflections</b>                                    | 11581                                                                                                 | 25677                                                                                                                                                                    | 5085                                                           | 8191                                                                                                  |
| <b>Radiation type</b>                                 | Cu <i>Kα</i>                                                                                          | Cu <i>Kα</i>                                                                                                                                                             | Cu <i>Kα</i>                                                   | Cu <i>Kα</i>                                                                                          |

$${}^aR1 = [\Sigma w(F_o - F_c)^2 / \Sigma wF_o^2]^{1/2}; {}^b wR2 = [\Sigma [w(F_o^2 - F_c^2)^2] / \Sigma w(F_o^2)^2]^{1/2}, w = 1/[\sigma^2(F_o^2) + (aP)^2 + bP], \text{ where } P = [\max(F_o^2, 0) + 2(F_c^2)]/3$$

Table S1. Continued...

|                                                       | [ <i>n</i> -Bu <sub>4</sub> N][MeSO <sub>3</sub> @4]                                                                                                                  | [ <i>n</i> -Bu <sub>4</sub> N][MeSO <sub>3</sub> @6]                                                                                  | [ <i>n</i> -Bu <sub>4</sub> N][MeSO <sub>3</sub> @7]                                                                                                                                                                | [ <i>n</i> -Bu <sub>4</sub> N][MeSO <sub>3</sub> @8]                                                                                                                       |
|-------------------------------------------------------|-----------------------------------------------------------------------------------------------------------------------------------------------------------------------|---------------------------------------------------------------------------------------------------------------------------------------|---------------------------------------------------------------------------------------------------------------------------------------------------------------------------------------------------------------------|----------------------------------------------------------------------------------------------------------------------------------------------------------------------------|
| <b>CCDC Number</b>                                    | 2104080                                                                                                                                                               | 2104078                                                                                                                               | 2104077                                                                                                                                                                                                             | 2104079                                                                                                                                                                    |
| <b>Chemical formula</b>                               | CH <sub>3</sub> SO <sub>3</sub> ·C <sub>75</sub> H <sub>70</sub> F <sub>8</sub> O <sub>8</sub> ·<br>C <sub>2</sub> H <sub>3</sub> N·C <sub>16</sub> H <sub>36</sub> N | CH <sub>3</sub> SO <sub>3</sub> ·C <sub>76</sub> H <sub>68</sub> F <sub>12</sub> O <sub>8</sub><br>·C <sub>16</sub> H <sub>36</sub> N | CH <sub>3</sub> SO <sub>3</sub> ·C <sub>82.11</sub> H <sub>77.75</sub> F <sub>1</sub><br><sub>6</sub> N <sub>0.38</sub> O <sub>8</sub> ·C <sub>2</sub> H <sub>3</sub> N·0.62(<br>C <sub>16</sub> H <sub>36</sub> N) | 2(CH <sub>3</sub> SO <sub>3</sub> ·C <sub>84</sub> H <sub>72</sub> F <sub>24</sub><br>O <sub>8</sub> )·C <sub>15</sub> H <sub>34</sub> N·C <sub>12</sub> H <sub>19</sub> N |
| <b>Formula weight</b>                                 | 1629.91                                                                                                                                                               | 1674.85                                                                                                                               | 1787.87                                                                                                                                                                                                             | 3926.72                                                                                                                                                                    |
| <b>Space group</b>                                    | <i>P2<sub>1</sub>2<sub>1</sub>2<sub>1</sub></i>                                                                                                                       | <i>P2<sub>1</sub>/n</i>                                                                                                               | <i>P2<sub>1</sub></i>                                                                                                                                                                                               | <i>P-1</i>                                                                                                                                                                 |
| <b><i>a</i> (Å)</b>                                   | 23.0191(11)                                                                                                                                                           | 12.5311(2)                                                                                                                            | 12.7581(10)                                                                                                                                                                                                         | 18.7373(19)                                                                                                                                                                |
| <b><i>b</i> (Å)</b>                                   | 22.9578(11)                                                                                                                                                           | 20.5937(3)                                                                                                                            | 22.867(2)                                                                                                                                                                                                           | 23.963(2)                                                                                                                                                                  |
| <b><i>c</i> (Å)</b>                                   | 32.8882(19)                                                                                                                                                           | 32.9760(5)                                                                                                                            | 16.3241(14)                                                                                                                                                                                                         | 25.256(3)                                                                                                                                                                  |
| <b><i>α</i> (deg)</b>                                 | 90                                                                                                                                                                    | 90                                                                                                                                    | 90                                                                                                                                                                                                                  | 82.849(5)                                                                                                                                                                  |
| <b><i>β</i> (deg)</b>                                 | 90                                                                                                                                                                    | 94.627(1)                                                                                                                             | 94.056(6)                                                                                                                                                                                                           | 74.062(6)                                                                                                                                                                  |
| <b><i>γ</i> (deg)</b>                                 | 90                                                                                                                                                                    | 90                                                                                                                                    | 90                                                                                                                                                                                                                  | 78.107(5)                                                                                                                                                                  |
| <b><i>V</i> (Å<sup>3</sup>)</b>                       | 17380.4(15)                                                                                                                                                           | 8482.1(2)                                                                                                                             | 4750.5(7)                                                                                                                                                                                                           | 10641.9(19)                                                                                                                                                                |
| <b><i>Z</i></b>                                       | 8                                                                                                                                                                     | 4                                                                                                                                     | 2                                                                                                                                                                                                                   | 2                                                                                                                                                                          |
| <b><i>μ</i> (mm<sup>-1</sup>)</b>                     | 0.97                                                                                                                                                                  | 1.08                                                                                                                                  | 1.06                                                                                                                                                                                                                | 1.10                                                                                                                                                                       |
| <b>T (K)</b>                                          | 150                                                                                                                                                                   | 220                                                                                                                                   | 110                                                                                                                                                                                                                 | 110                                                                                                                                                                        |
| <b><i>R</i>1<sup>a</sup> (<i>wR</i>2<sup>b</sup>)</b> | 0.133 (0.379)                                                                                                                                                         | 0.081 (0.246)                                                                                                                         | 0.174 (0.493)                                                                                                                                                                                                       | 0.313 (0.668)                                                                                                                                                              |
| <b>Reflections</b>                                    | 23869                                                                                                                                                                 | 12068                                                                                                                                 | 14968                                                                                                                                                                                                               | 26546                                                                                                                                                                      |
| <b>Radiation type</b>                                 | Cu <i>Kα</i>                                                                                                                                                          | Cu <i>Kα</i>                                                                                                                          | Cu <i>Kα</i>                                                                                                                                                                                                        | Cu <i>Kα</i>                                                                                                                                                               |

$${}^aR1 = [\Sigma w(F_o - F_c)^2 / \Sigma w F_o^2]^{1/2}; {}^b wR2 = [\Sigma [w(F_o^2 - F_c^2)^2] / \Sigma w(F_o^2)^2]^{1/2}, w = 1/[\sigma^2(F_o^2) + (aP)^2 + bP], \text{ where } P = [\max(F_o^2, 0) + 2(F_c^2)]/3$$

*Side view*

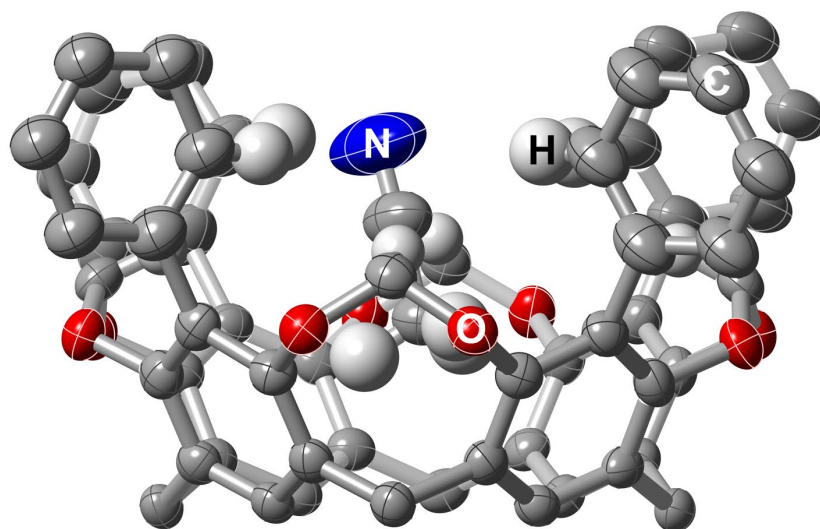

*Top view*

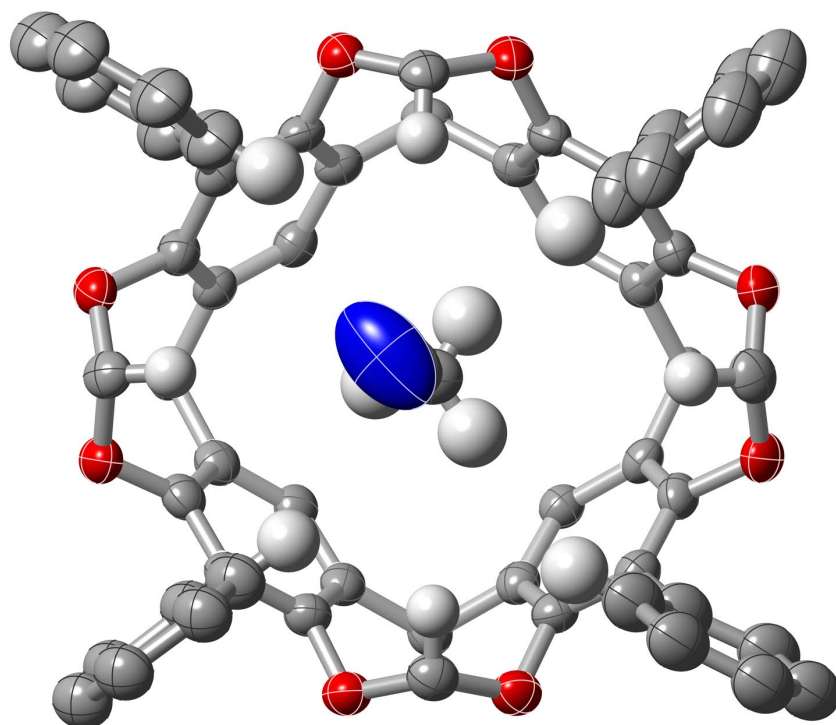

**Figure S1.** Molecular crystal structure of **1** obtained at 220 K. Thermal ellipsoids are set at 50% probability level. Hydrogen atoms are omitted for clarity, except those in the binding cavity.

*Side view*

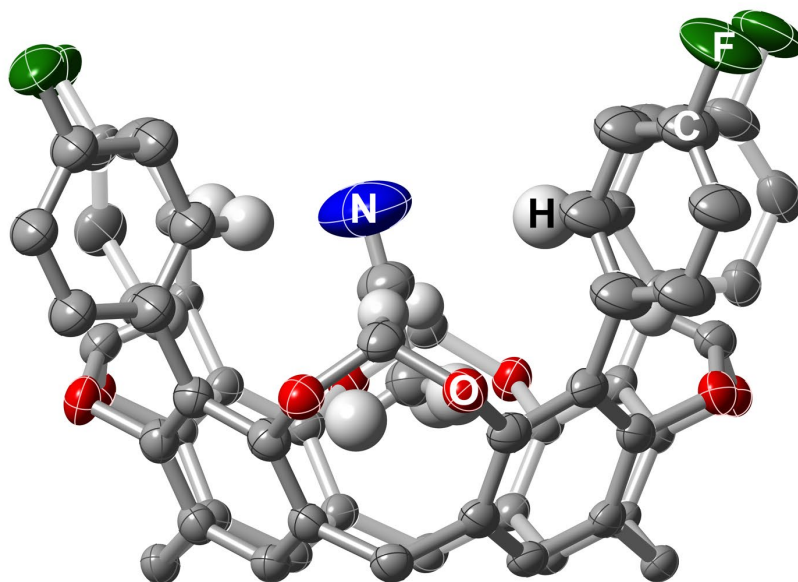

*Top view*

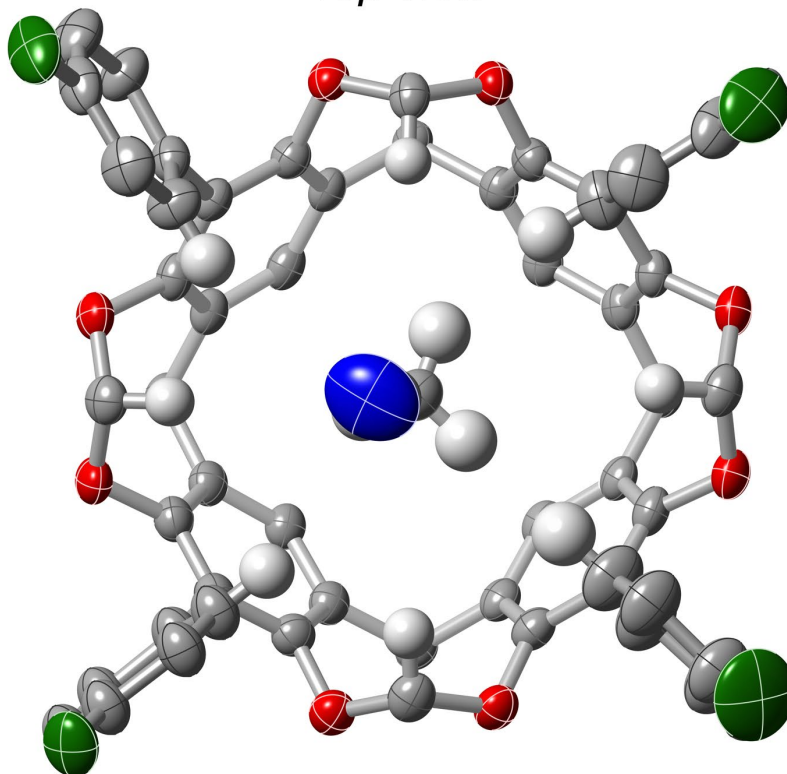

**Figure S2.** Molecular crystal structure of **2** obtained at 150 K. Thermal ellipsoids are set at 50% probability level. Hydrogen atoms are omitted for clarity, except those in the binding cavity.

*Side view*

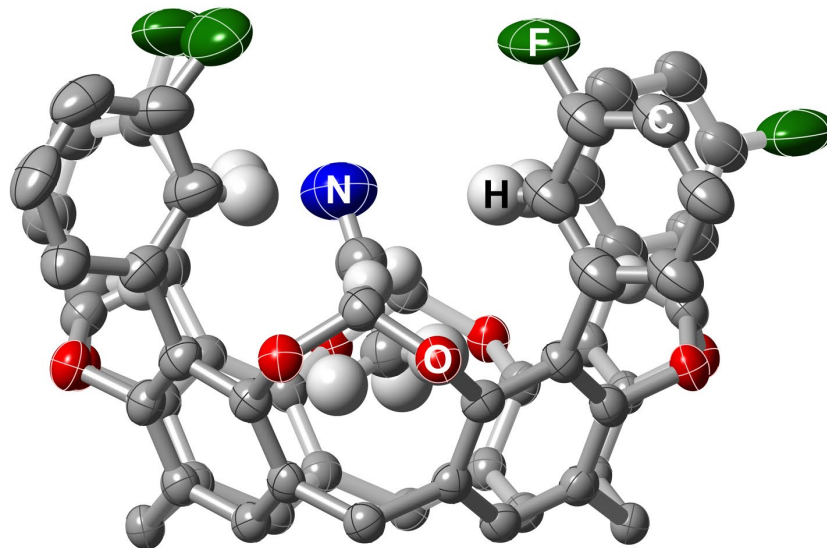

*Top view*

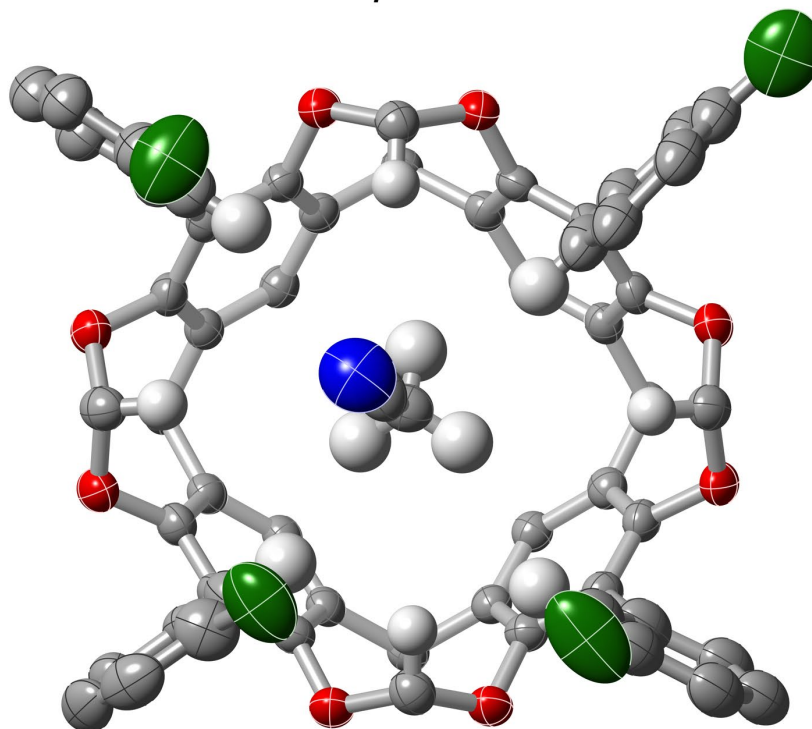

**Figure S3.** Molecular crystal structure of **3** obtained at 220 K. Thermal ellipsoids are set at 50% probability level. Hydrogen atoms are omitted for clarity, except those in the binding cavity.

*Side view*

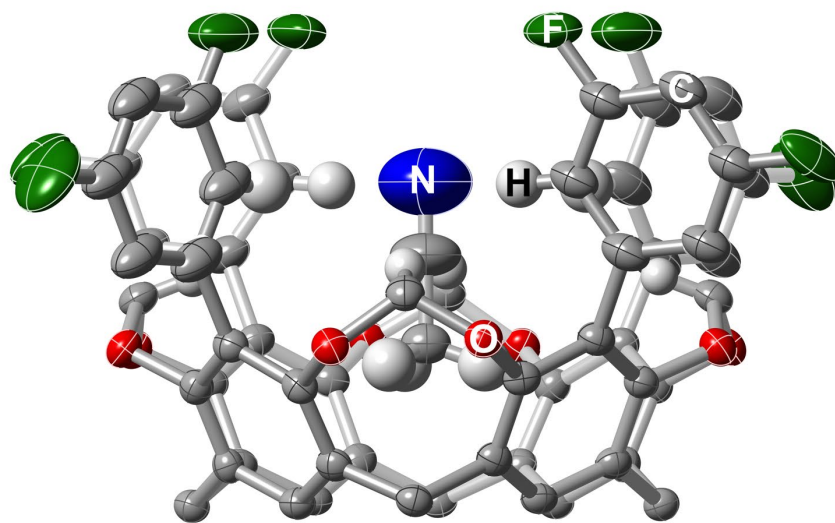

*Top view*

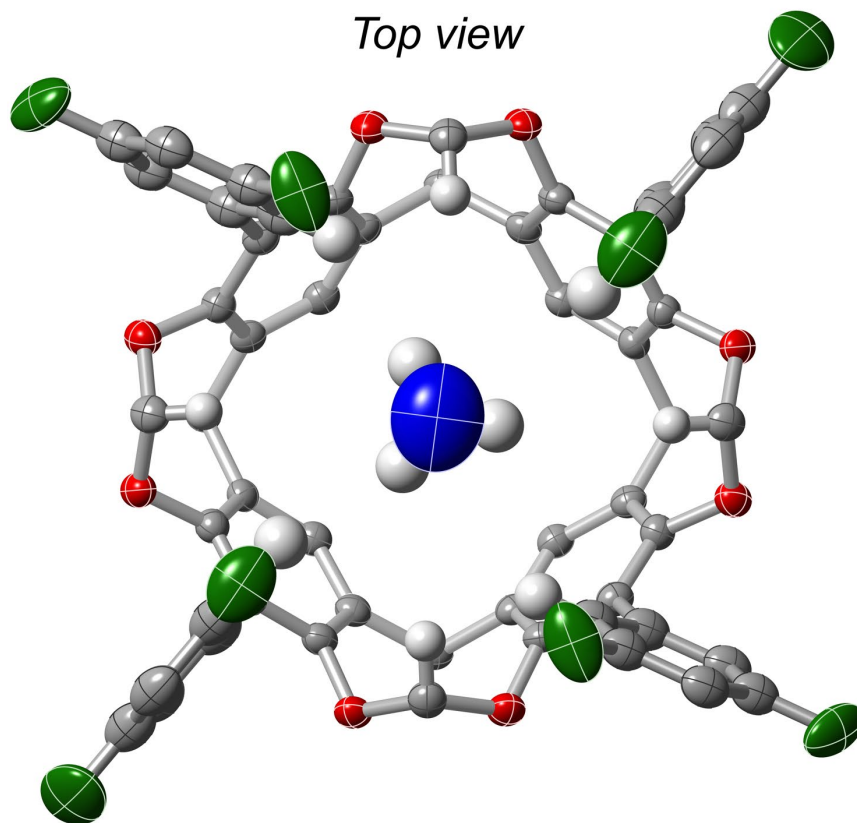

**Figure S4.** Molecular crystal structure of **4** obtained at 230 K. Thermal ellipsoids are set at 50% probability level. Hydrogen atoms are omitted for clarity, except those in the binding cavity.

*Side view*

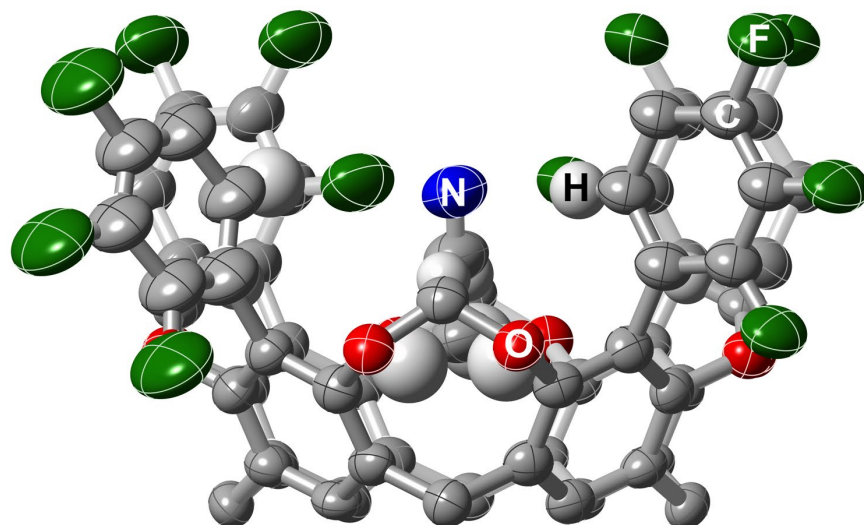

*Top view*

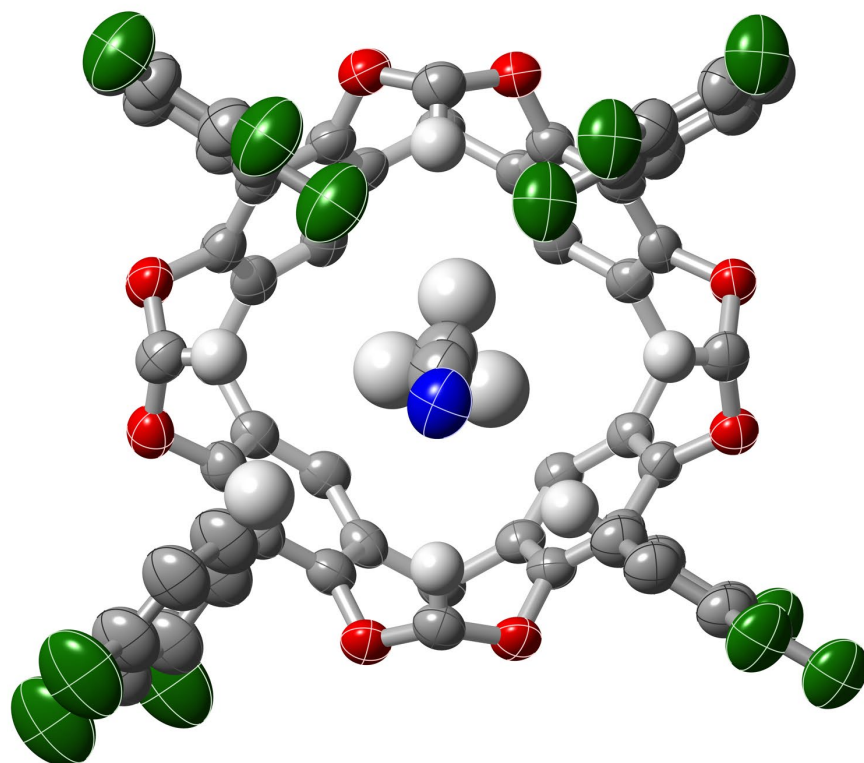

**Figure S5.** Molecular crystal structure of **5** obtained at 210 K. Thermal ellipsoids are set at 50% probability level. Hydrogen atoms are omitted for clarity, except those in the binding cavity.



*Side view*

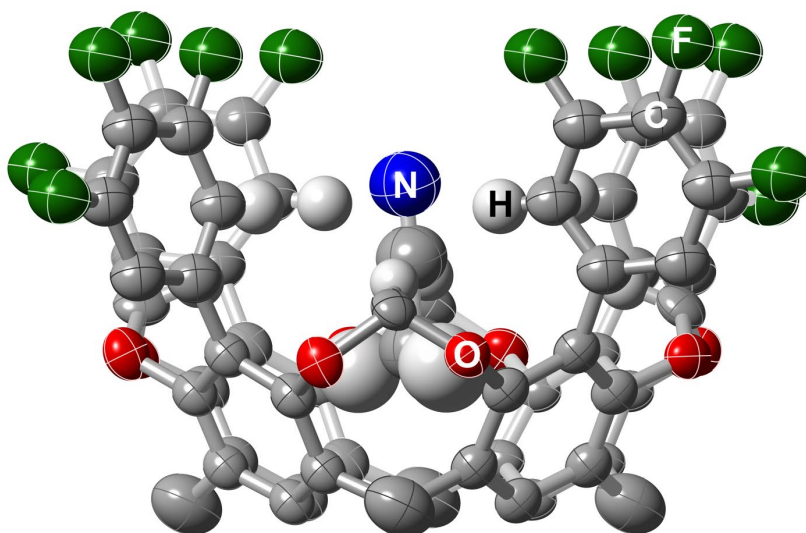

*Top view*

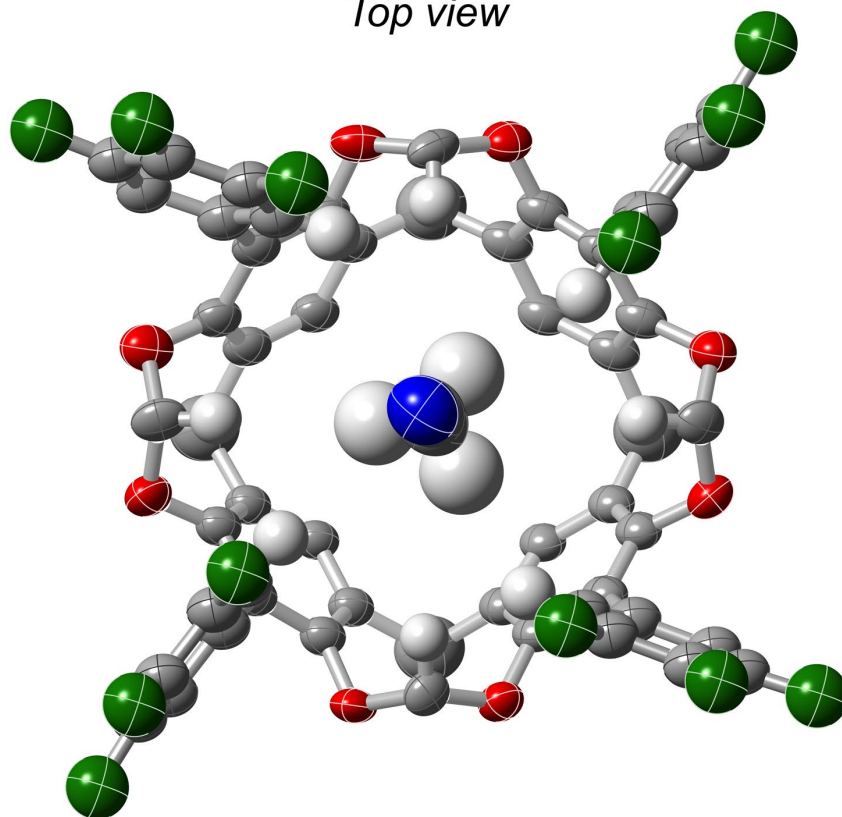

**Figure S6.** Molecular crystal structure of **6** obtained at 200 K. Thermal ellipsoids are set at 30% probability level. Hydrogen atoms are omitted for clarity, except those in the binding cavity.

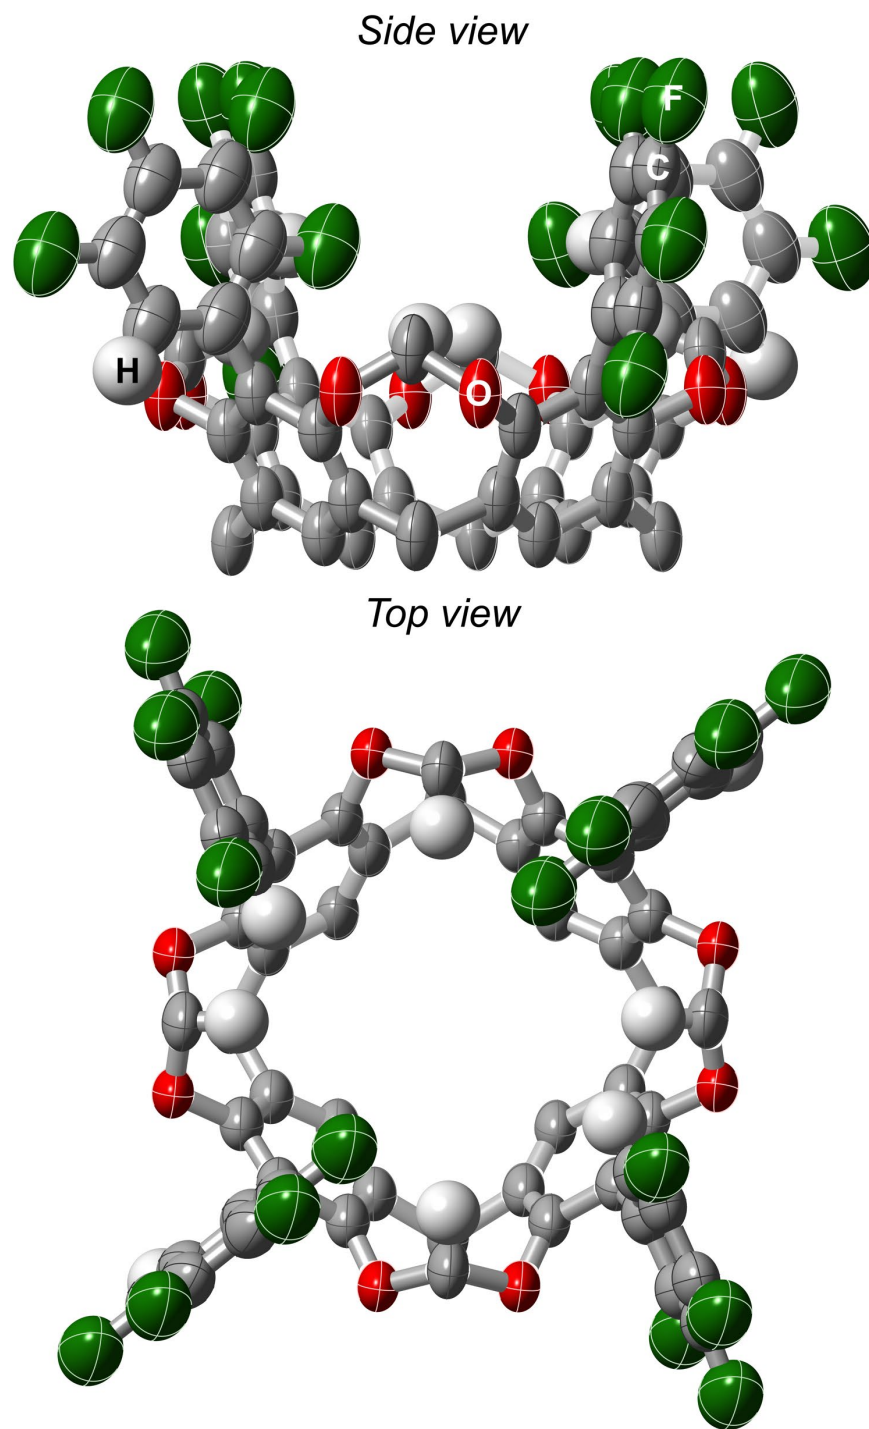

**Figure S7.** Molecular crystal structure of **7** obtained at 220 K. Thermal ellipsoids are set at 50% probability level. Hydrogen atoms are omitted for clarity, except those in the binding cavity.

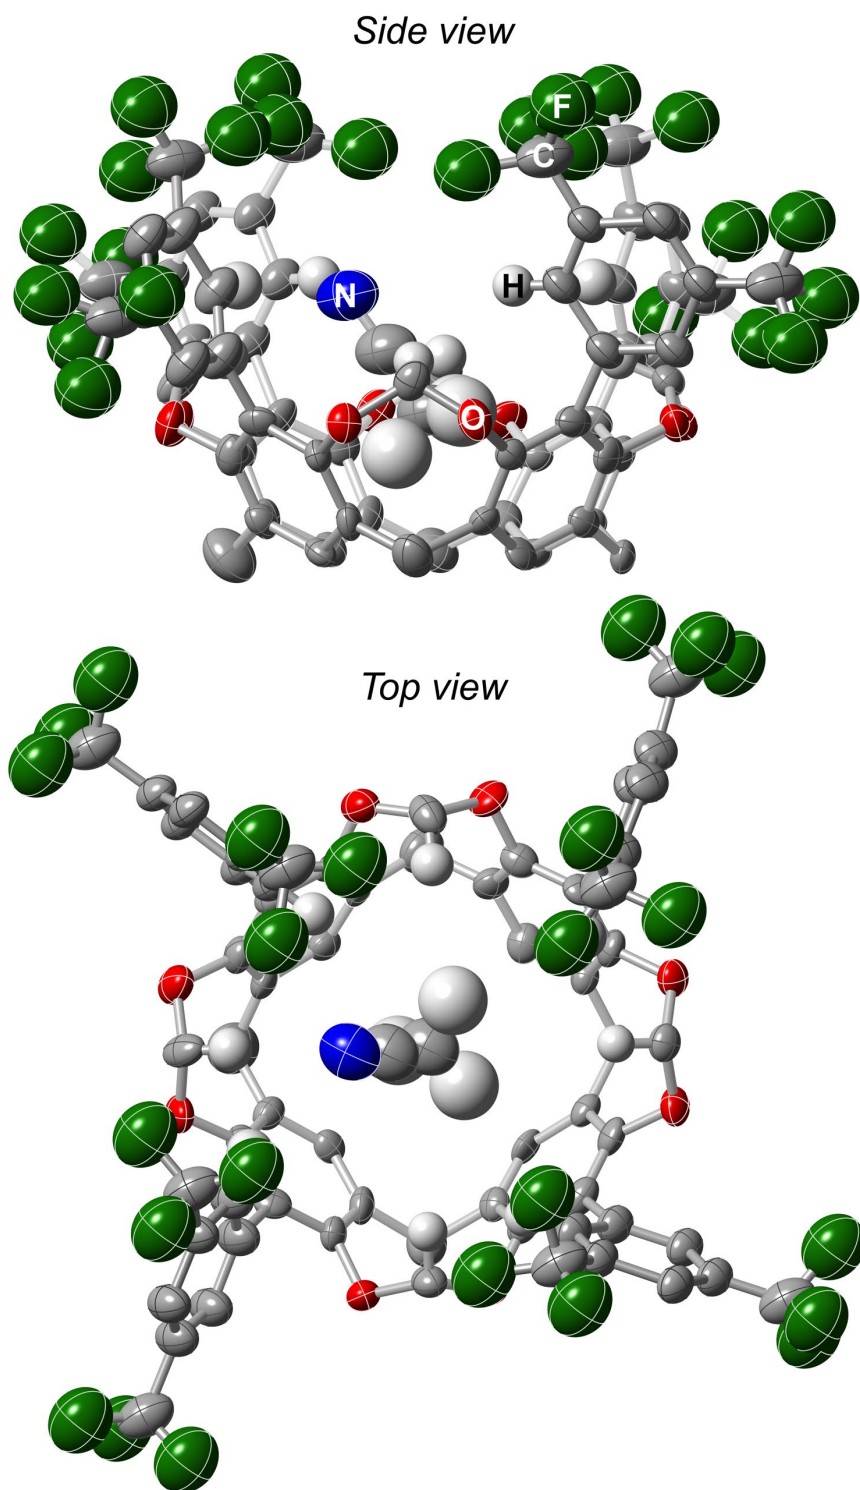

**Figure S8.** Molecular crystal structure of **8** obtained at 210 K. Thermal ellipsoids are set at 50% probability level. Hydrogen atoms are omitted for clarity, except those in the binding cavity.

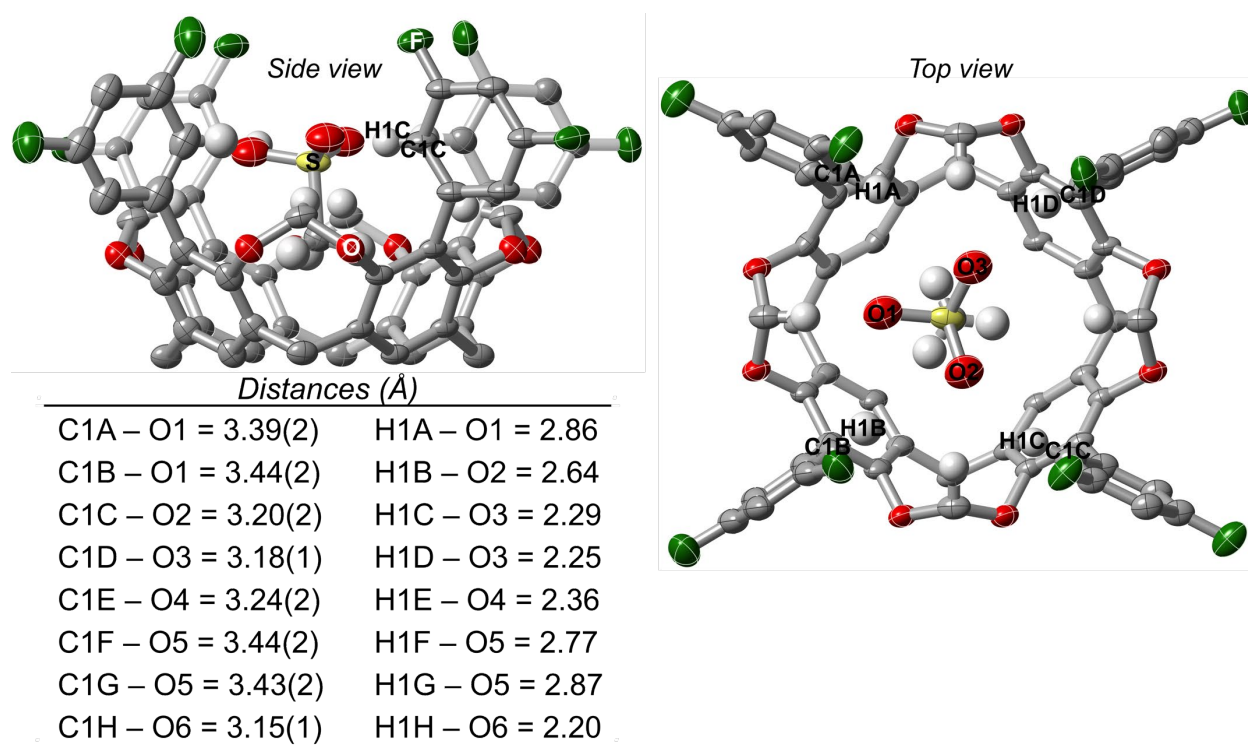

**Figure S9.** Molecular crystal structure of [MeSO<sub>3</sub>C<sub>4</sub>]<sup>-</sup> obtained at 150 K. Thermal ellipsoids are set at 30% probability level. Hydrogen atoms are omitted for clarity, except those in the binding cavity. The asymmetric unit contains two unique [MeSO<sub>3</sub>C<sub>4</sub>]<sup>-</sup> moieties. Distances:  $d_{\text{avg}}(\text{C}-\text{O}) = 3.31(4)$  Å, and  $d_{\text{avg}}(\text{H}-\text{O}) = 2.5(1)$  Å.

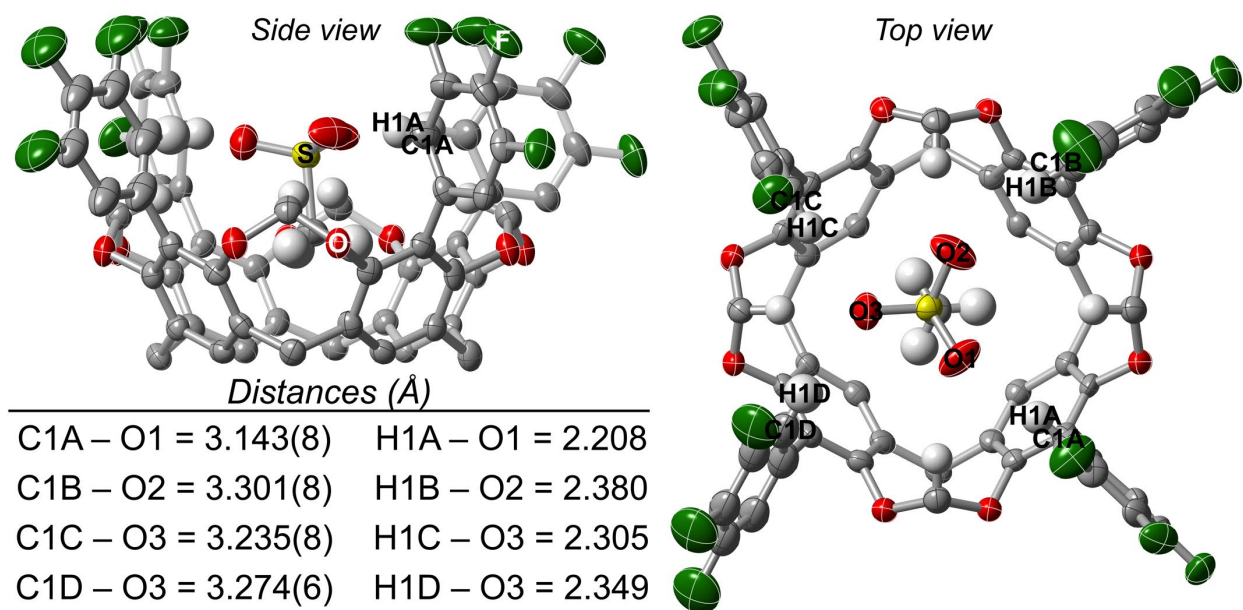

**Figure S10.** Molecular crystal structure of  $[\text{MeSO}_3\text{C}_6]^-$  obtained at 220 K. Thermal ellipsoids are set at 50% probability level. Hydrogen atoms are omitted for clarity, except those in the binding cavity. Distances:  $d_{\text{avg}}(\text{C}-\text{O}) = 3.24(3) \text{ \AA}$ , and  $d_{\text{avg}}(\text{H}-\text{O}) = 2.31(4) \text{ \AA}$ .



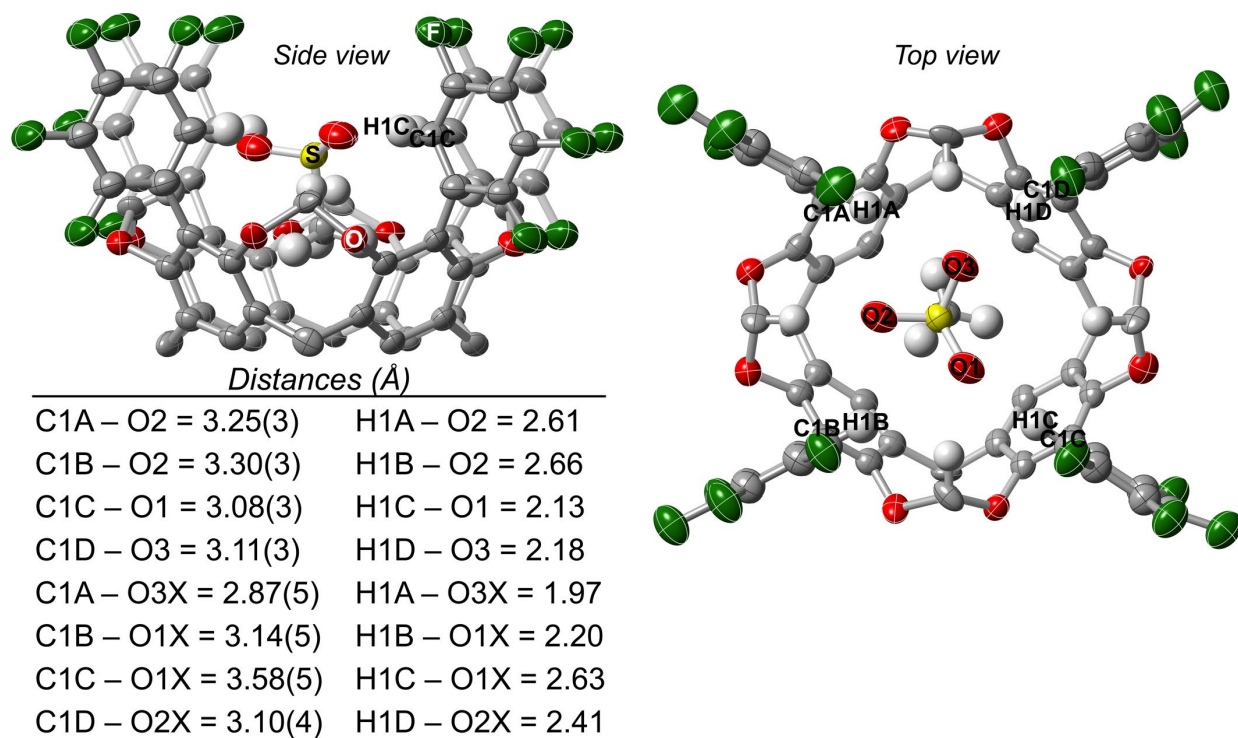

**Figure S11.** Molecular crystal structure of  $[\text{MeSO}_3\text{C}7]^-$  obtained at 110 K. Thermal ellipsoids are set at 30% probability level. Hydrogen atoms are omitted for clarity, except those in the binding cavity.  $[\text{MeSO}_3]^-$  is disordered around two positions, where the second position is labeled with an “X” at the end of the atom’s name. Distances:  $d_{\text{avg}}(\text{C}-\text{O}) = 3.18(7) \text{ \AA}$ , and  $d_{\text{avg}}(\text{H}-\text{O}) = 2.35(9) \text{ \AA}$ .

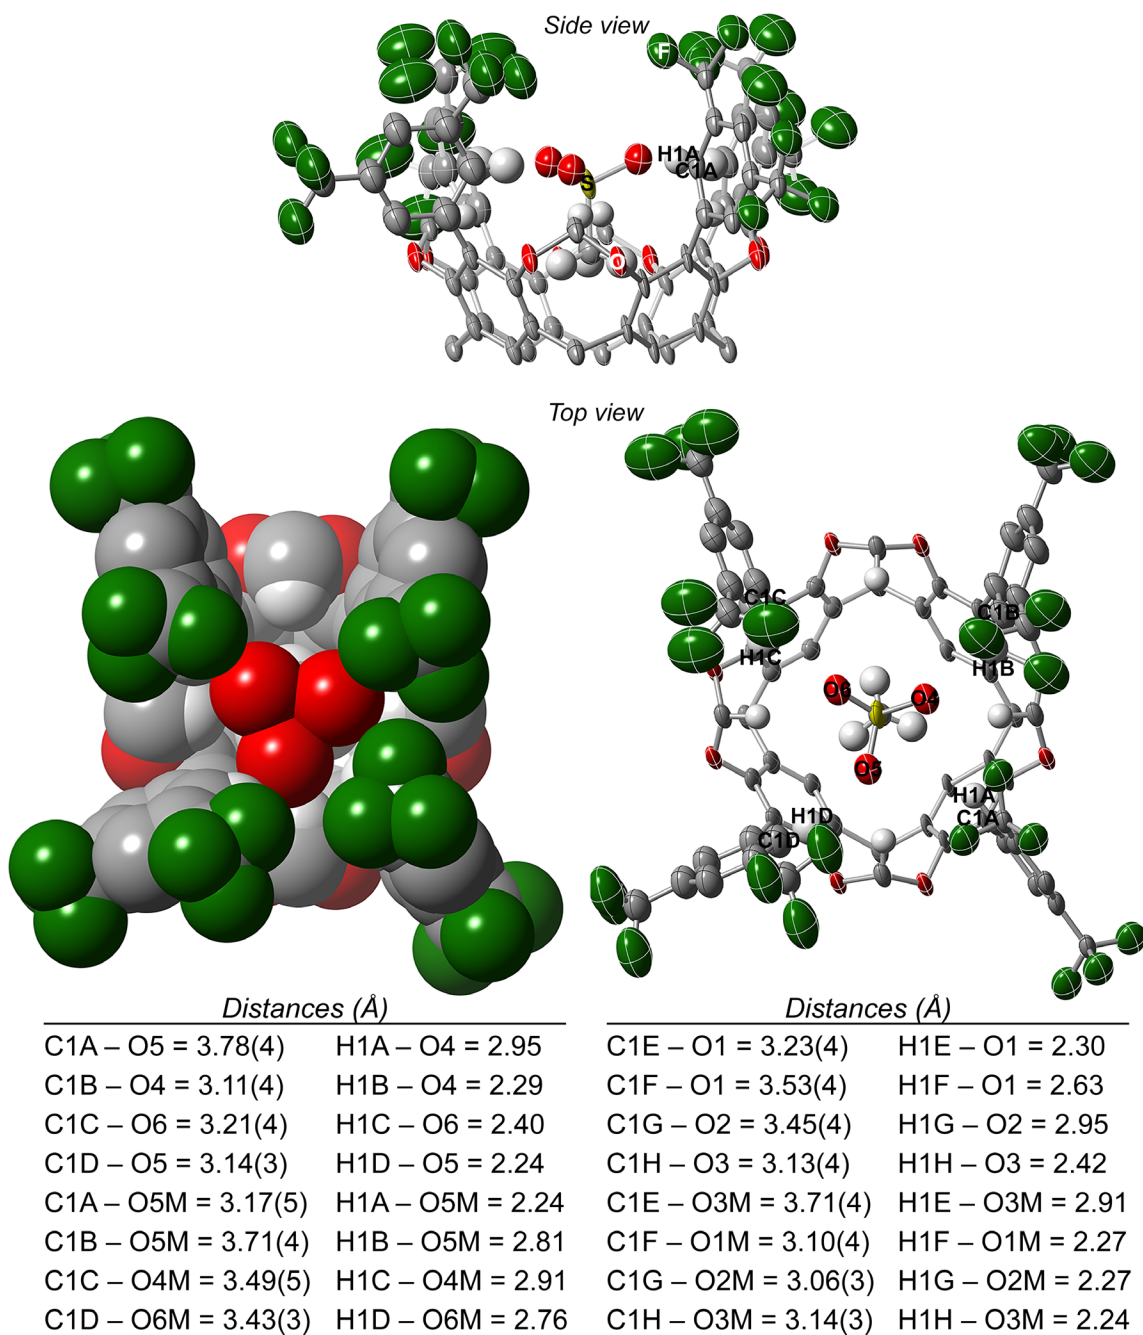

**Figure S12.** Molecular crystal structure of  $[\text{MeSO}_3\text{C}_8]^-$  obtained at 110 K. Thermal ellipsoids are set at 50% probability level. Hydrogen atoms are omitted for clarity, except those in the binding cavity. The asymmetric unit contains two unique  $[\text{MeSO}_3\text{C}_8]^-$  moieties, and in each of them the anion  $[\text{MeSO}_3]^-$  is disordered around two positions, where the second position is labeled with an “M” at the end of the atom’s name. Distances:  $d_{\text{avg}}(\text{C}-\text{O}) = 3.34(6)$  Å, and  $d_{\text{avg}}(\text{H}-\text{O}) = 2.54(7)$  Å. Left top view is the sphere packing model using van der Waals radii.

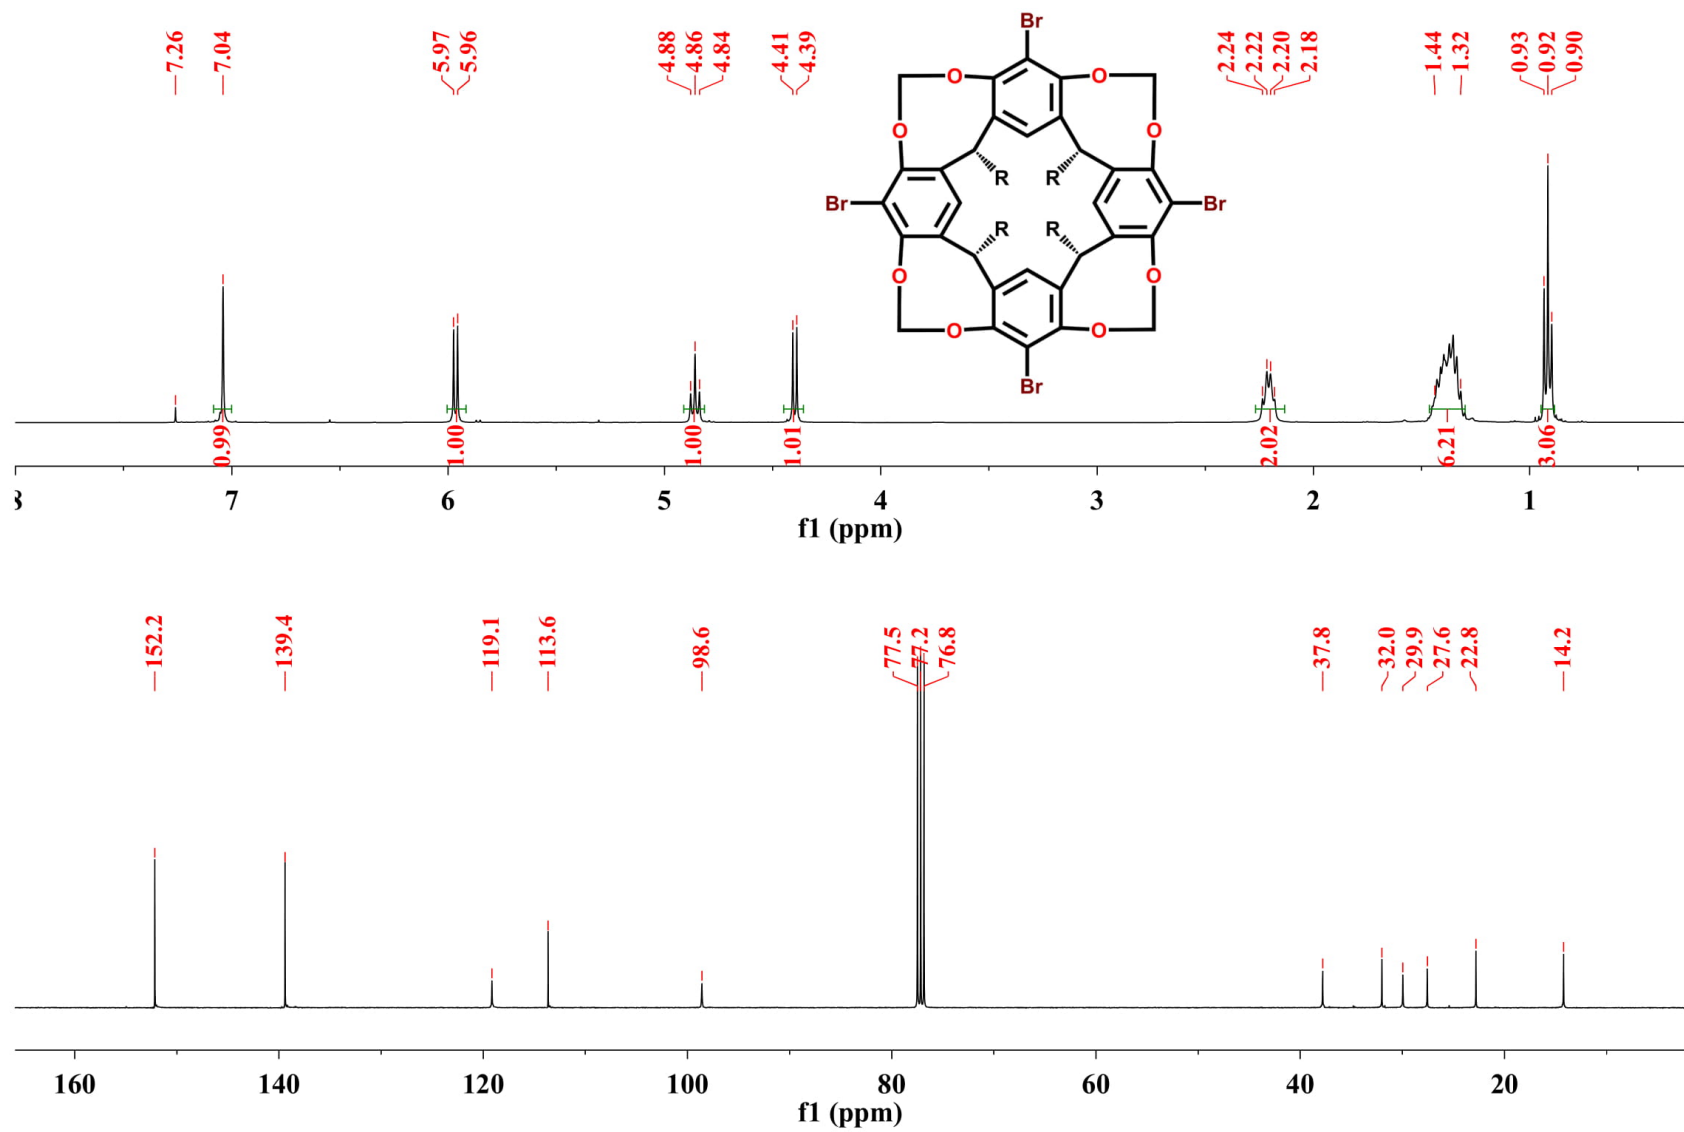

**Figure S13.**  $^1\text{H}$  and  $^{13}\text{C}$  NMR spectra of S1. Data collected in CDCl<sub>3</sub> at 20 °C.



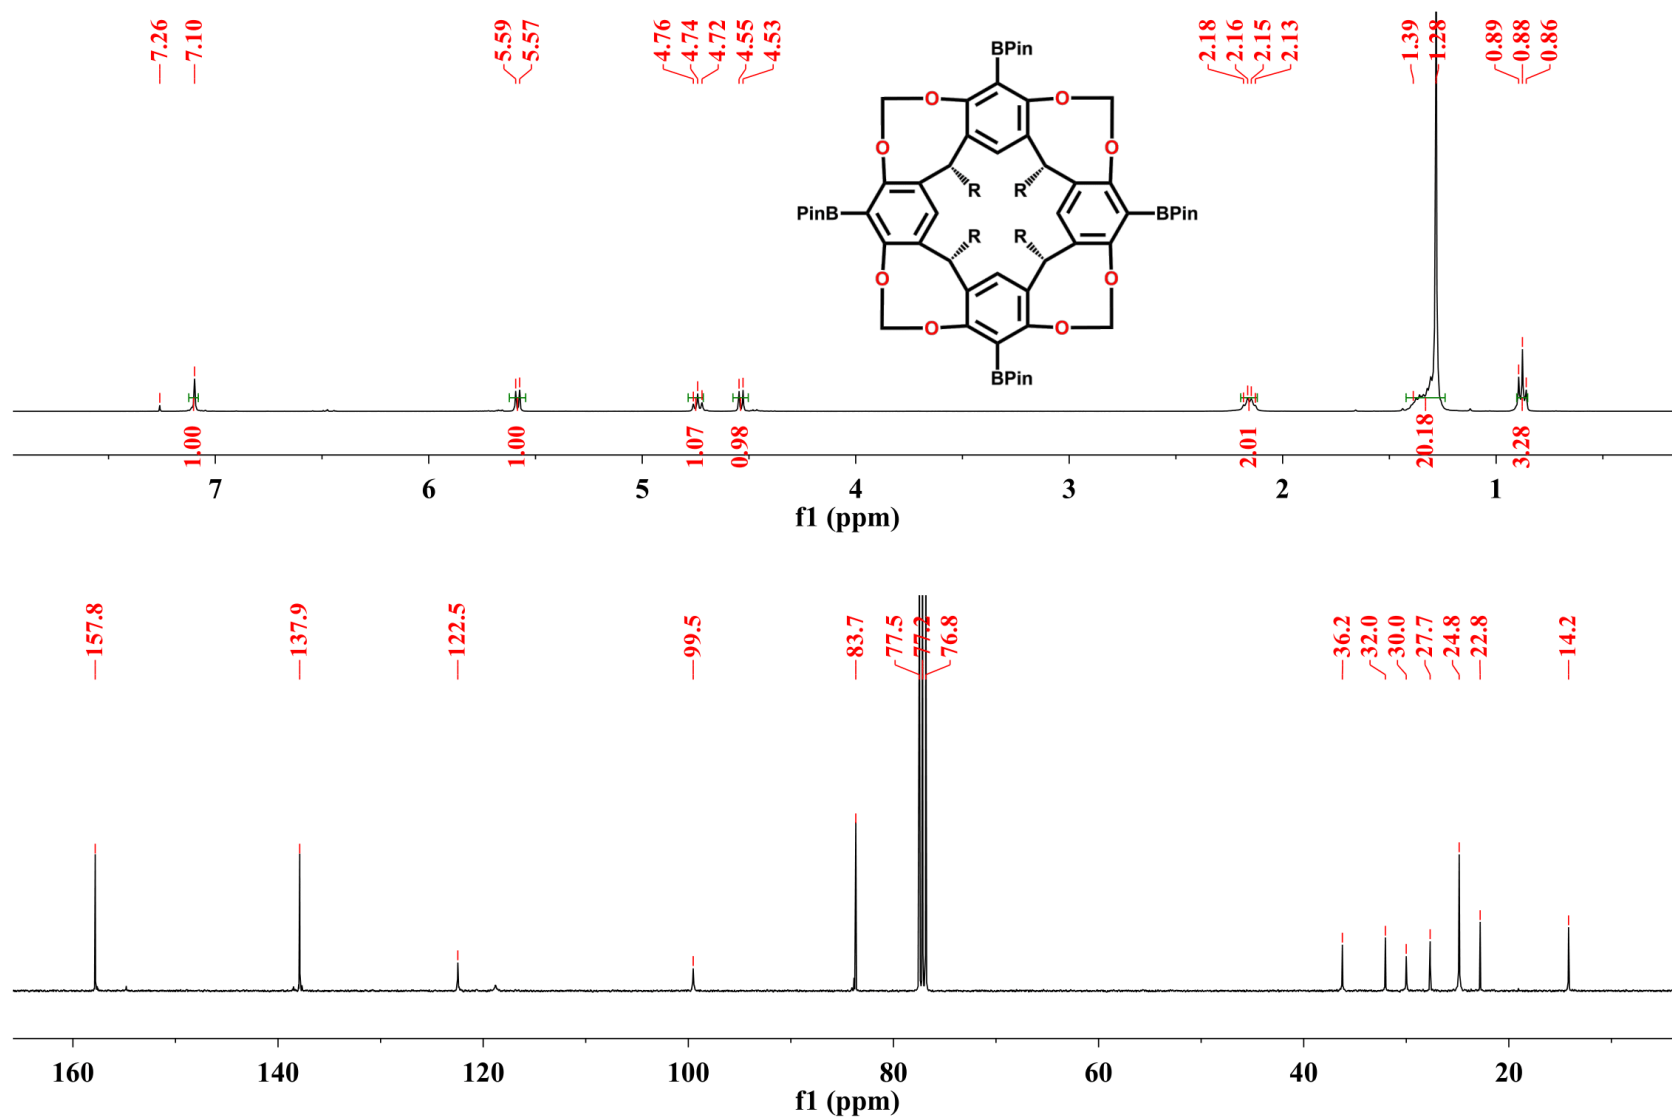

**Figure S14.**  $^1\text{H}$  and  $^{13}\text{C}$  NMR spectra of S2. Data collected in CDCl<sub>3</sub> at 20 °C.

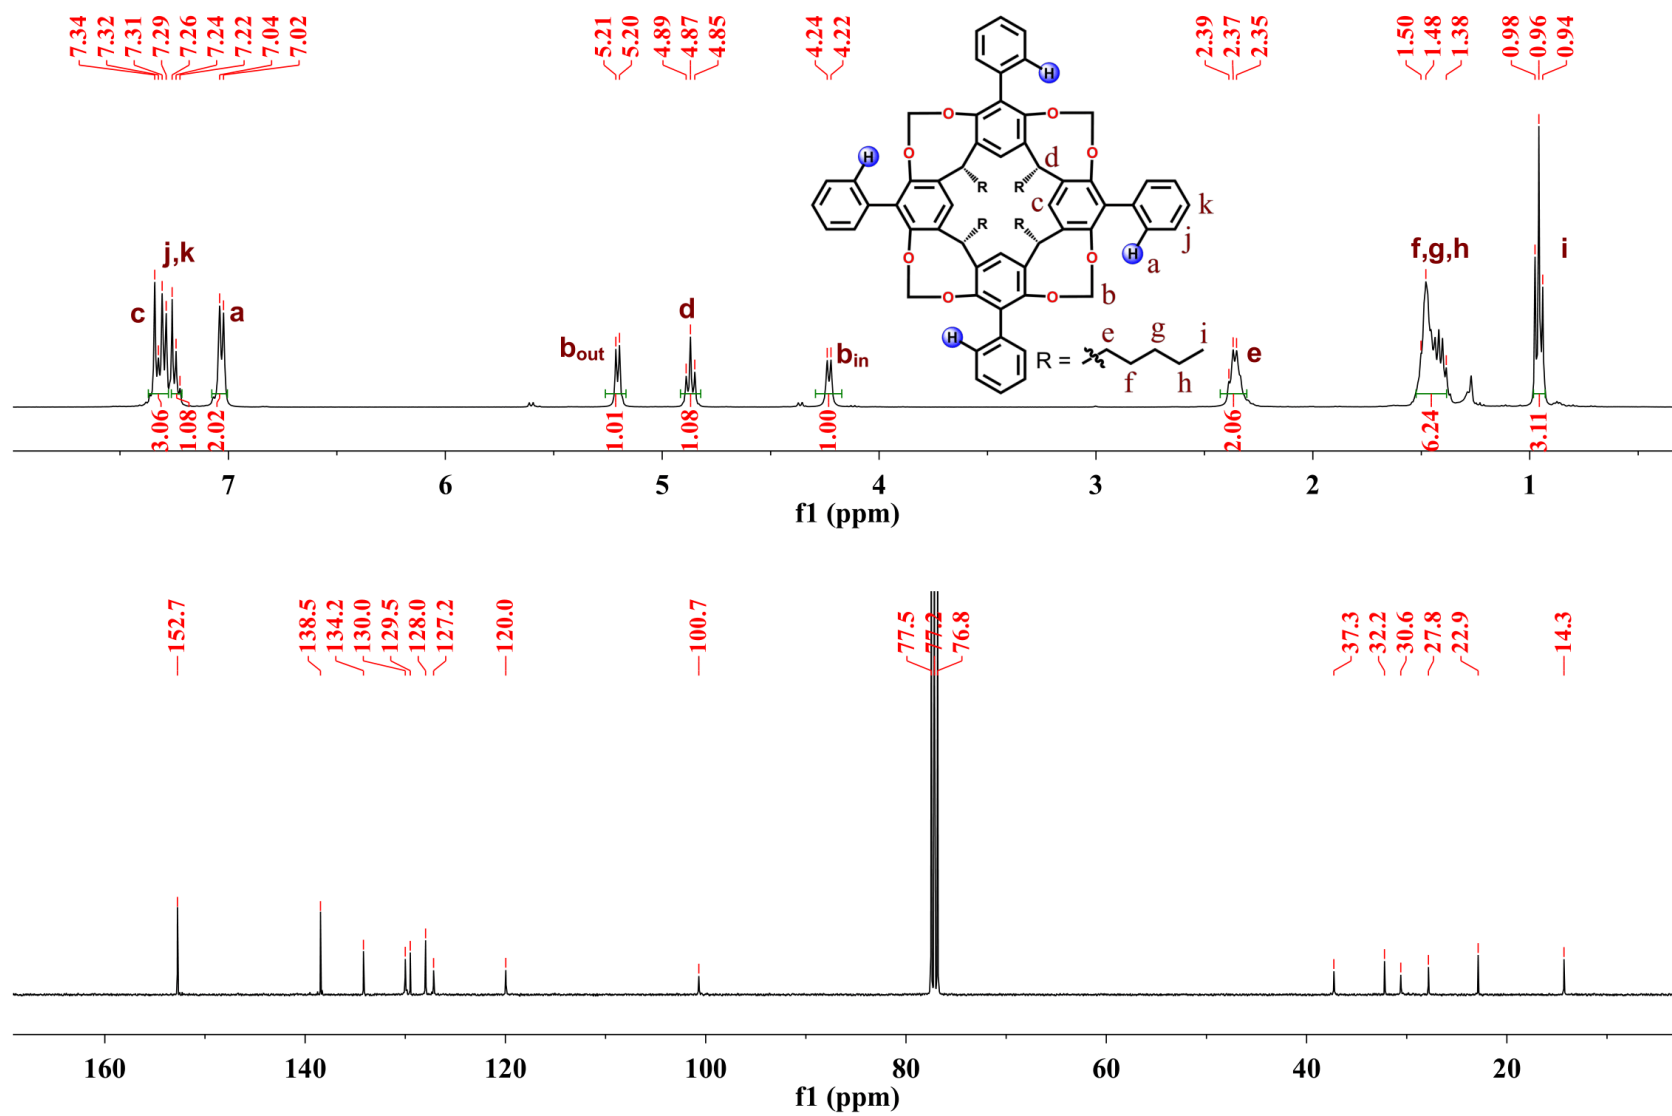

**Figure S15.**  $^1\text{H}$  and  $^{13}\text{C}$  NMR spectra of **1**. Data collected in  $\text{CDCl}_3$  at 20 °C.

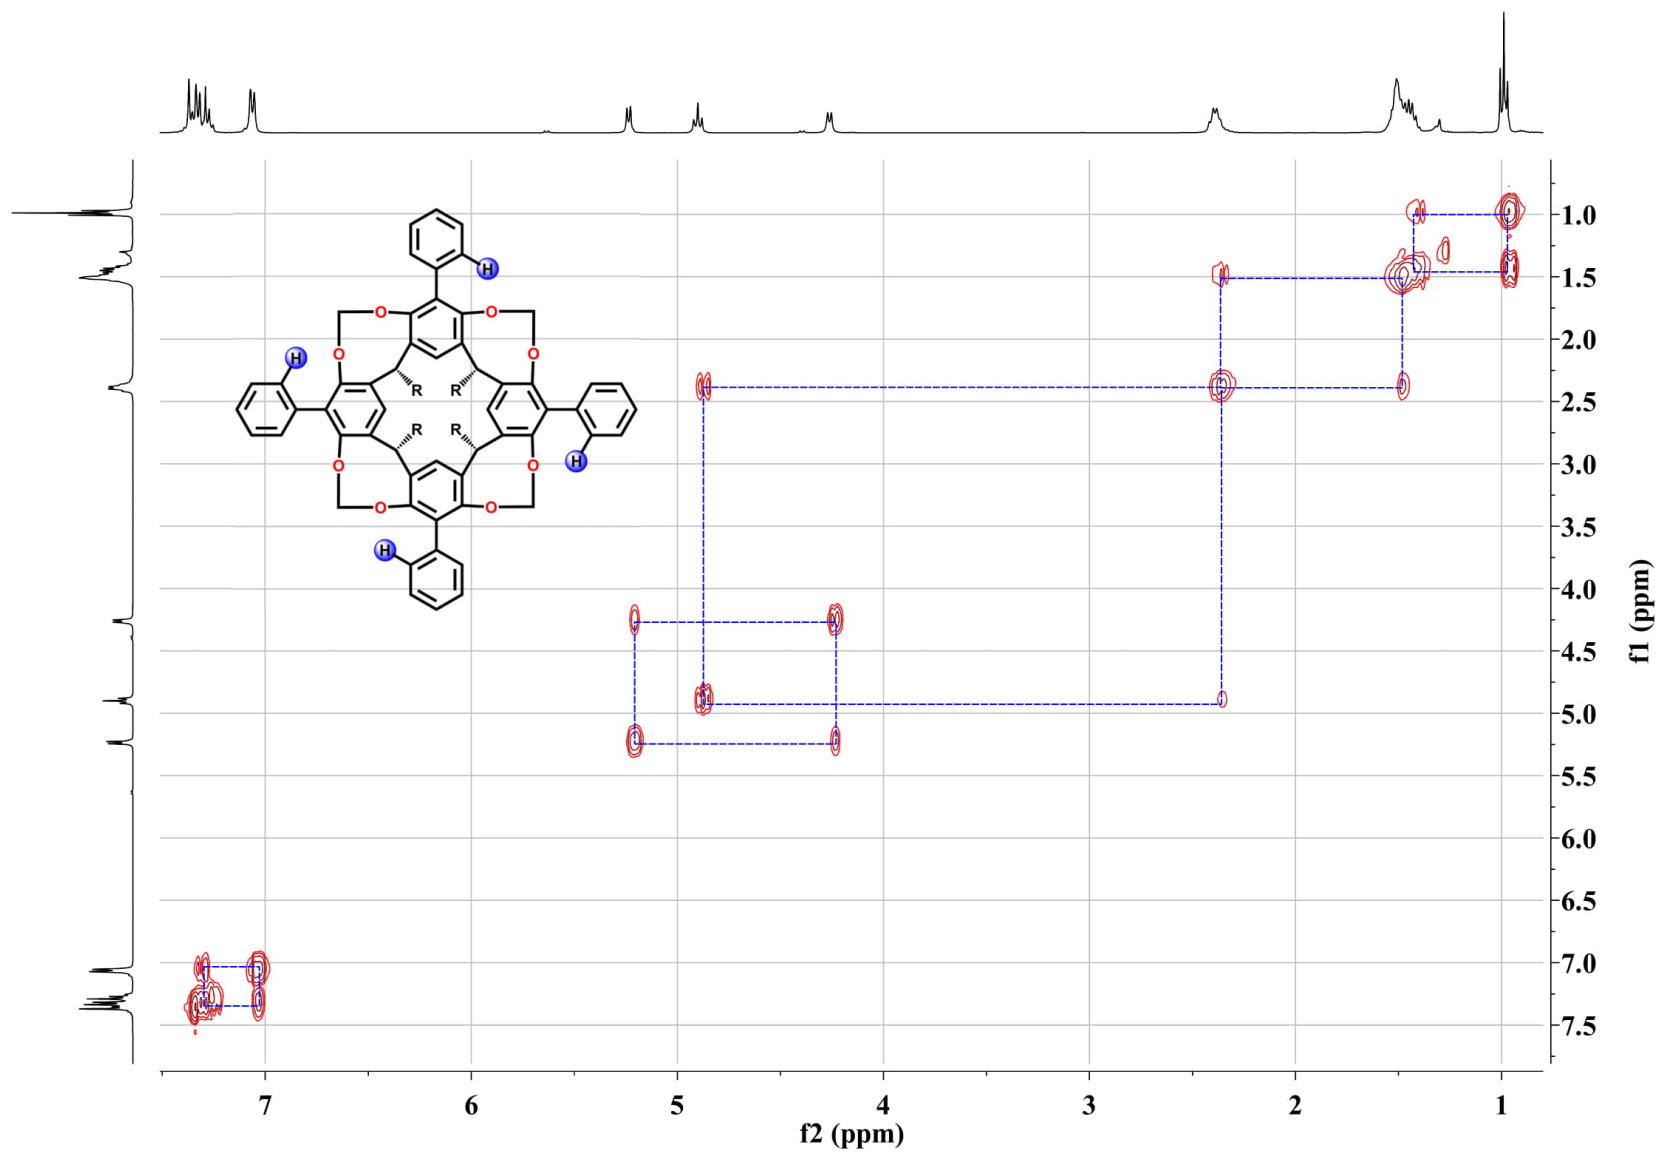

**Figure S16.** COSY NMR spectrum of **1**. Data collected in CDCl<sub>3</sub> at 20 °C.

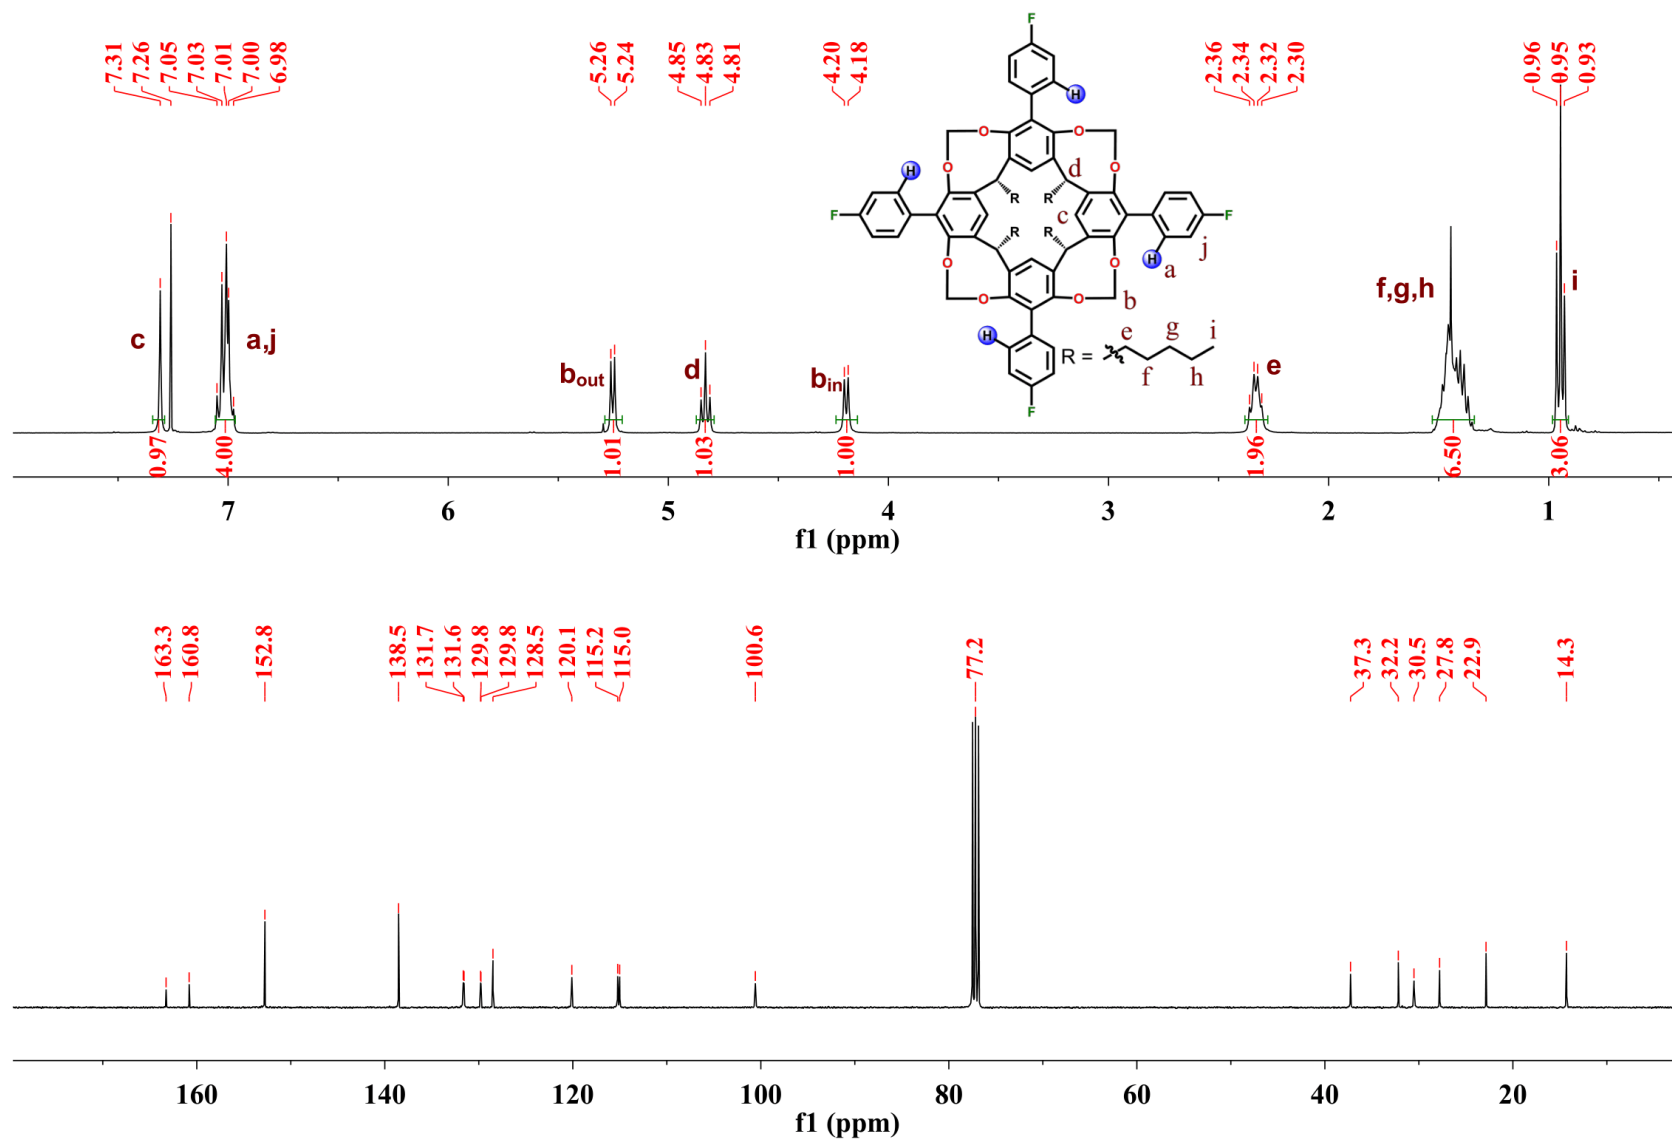

**Figure S17.**  $^1\text{H}$  and  $^{13}\text{C}$  NMR spectra of **2**. Data collected in  $\text{CDCl}_3$  at 20 °C.

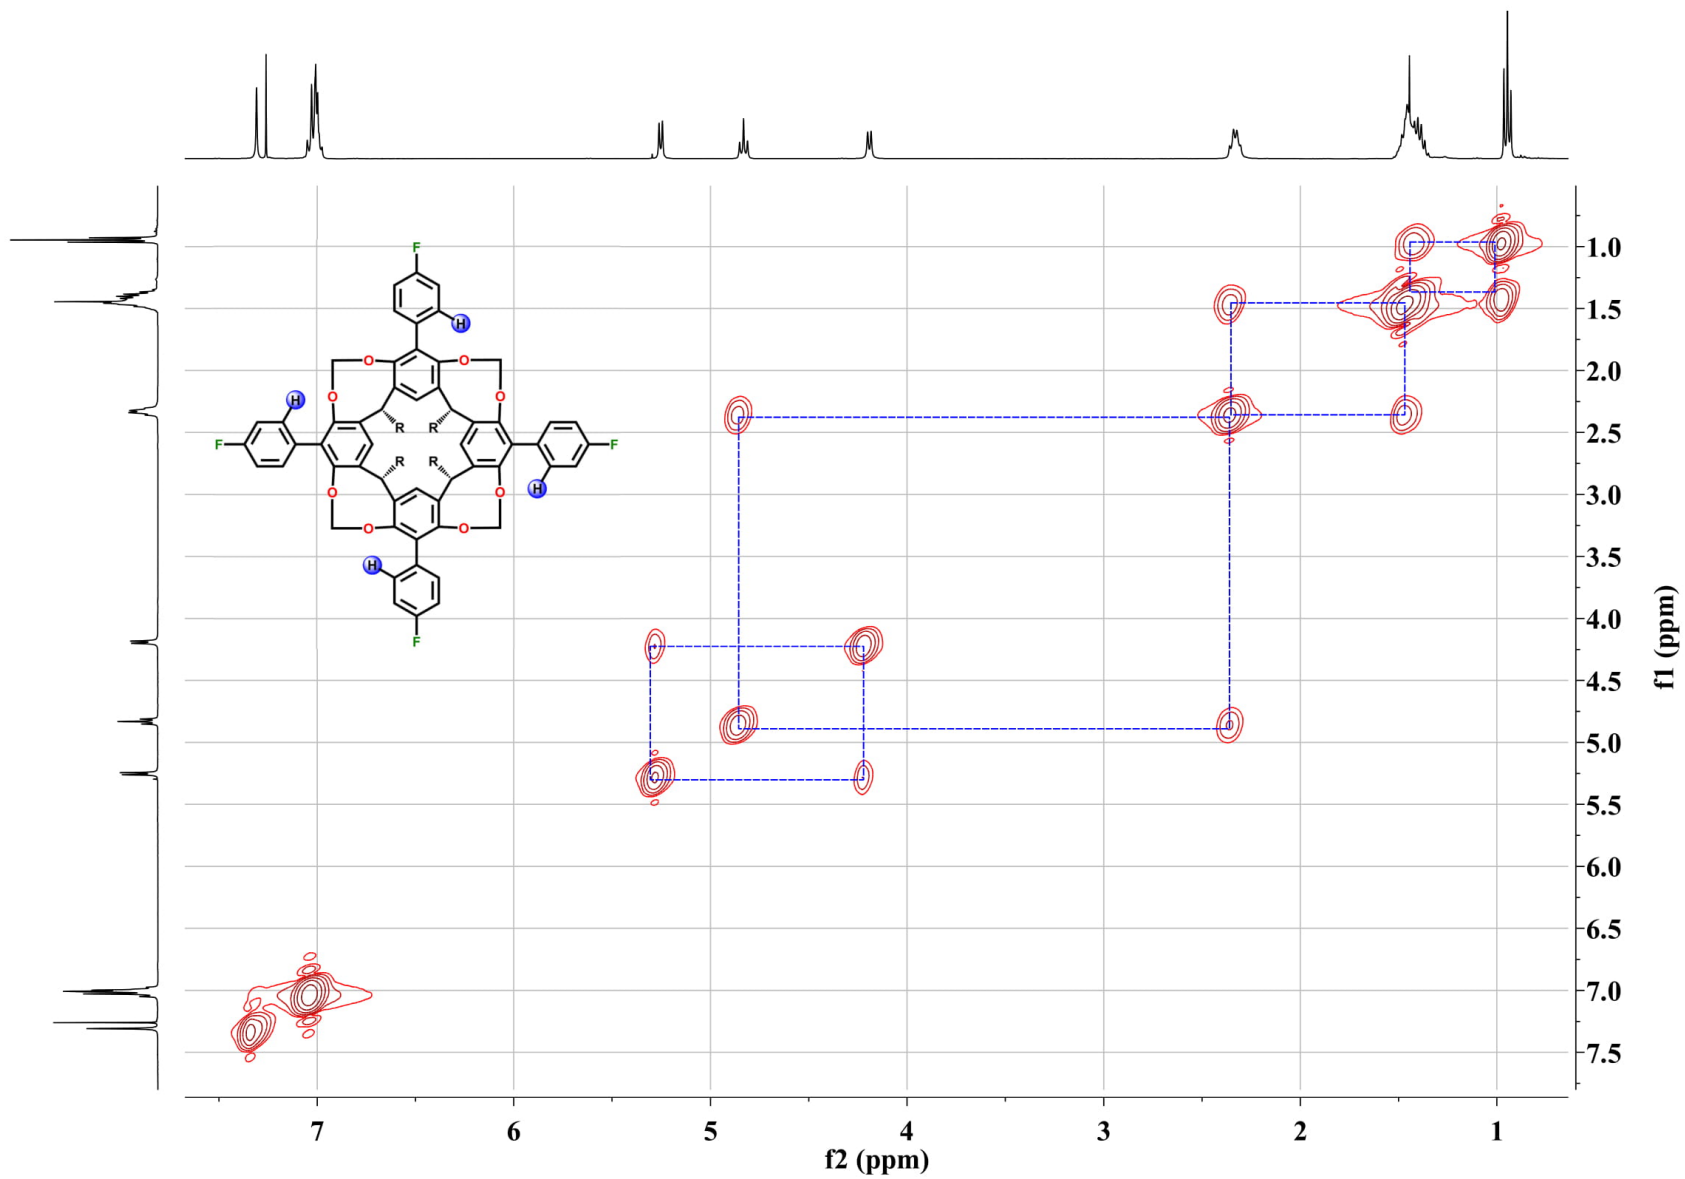

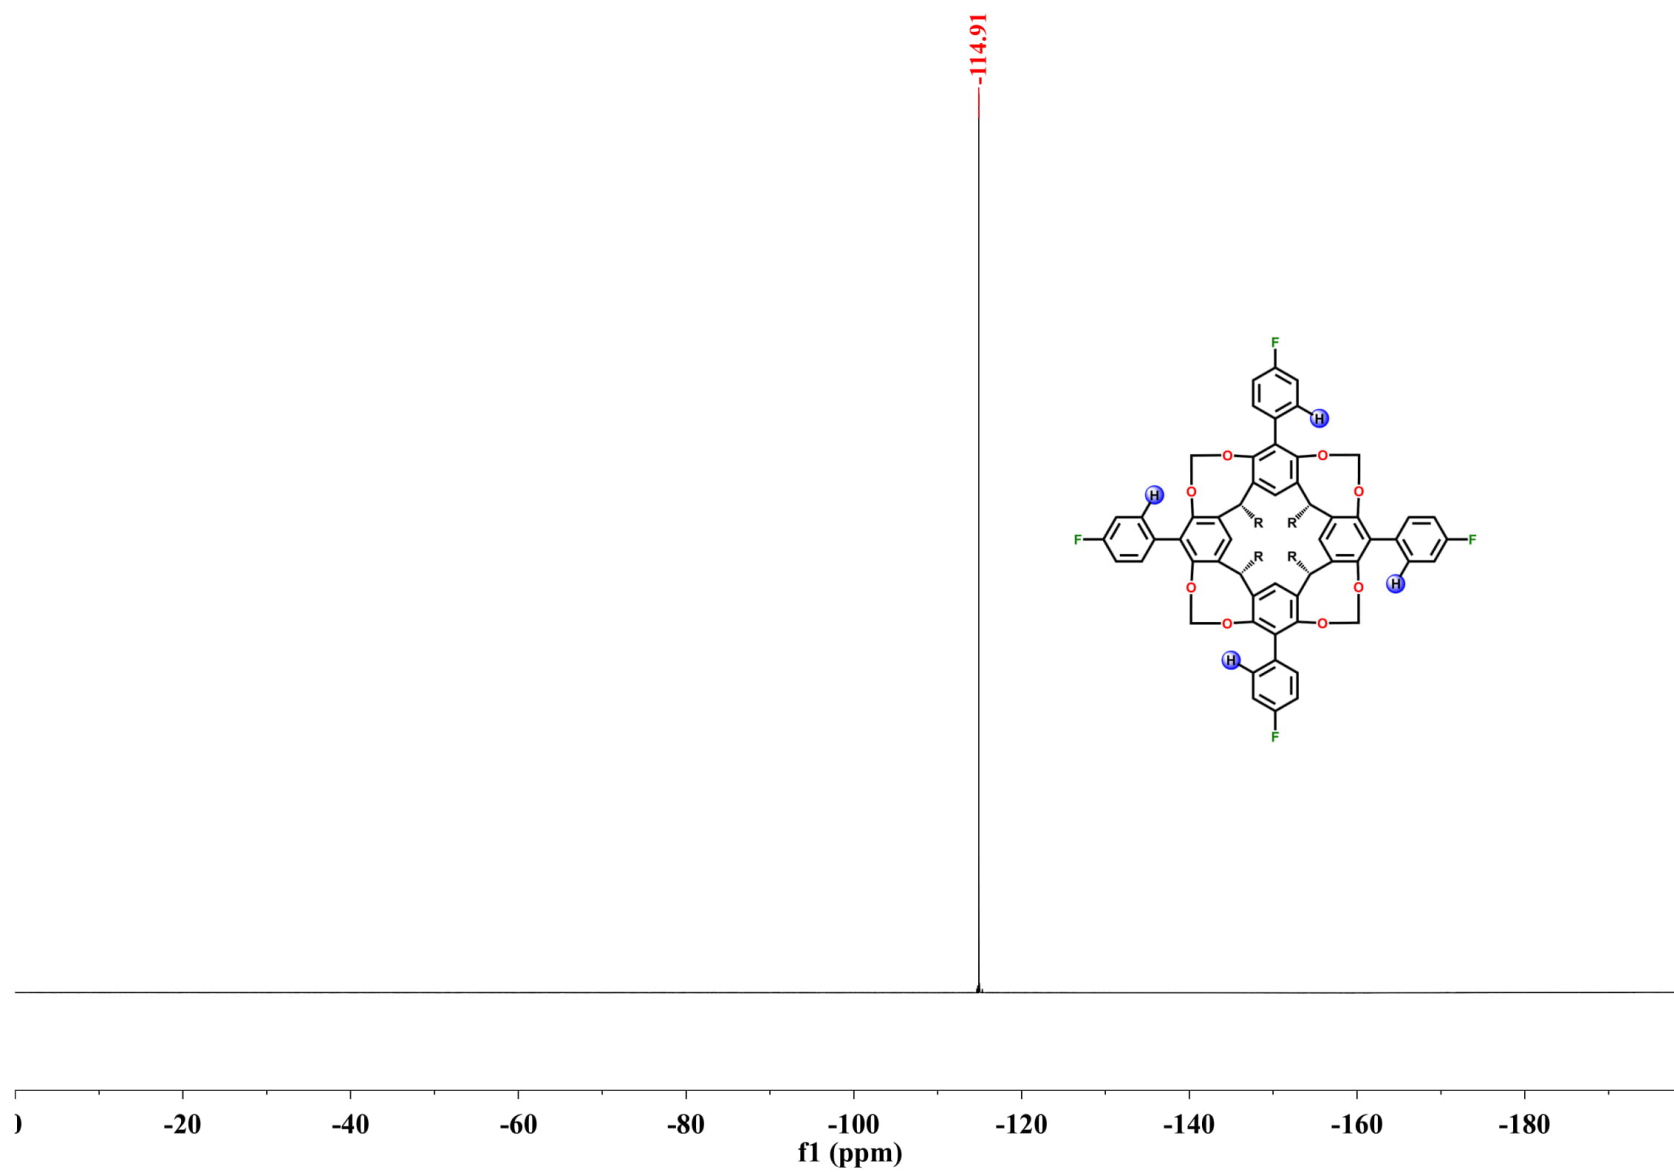

**Figure S19.**  $^{19}\text{F}$  NMR spectrum of **2**. Data collected in  $\text{CDCl}_3$  at 20  $^\circ\text{C}$ .

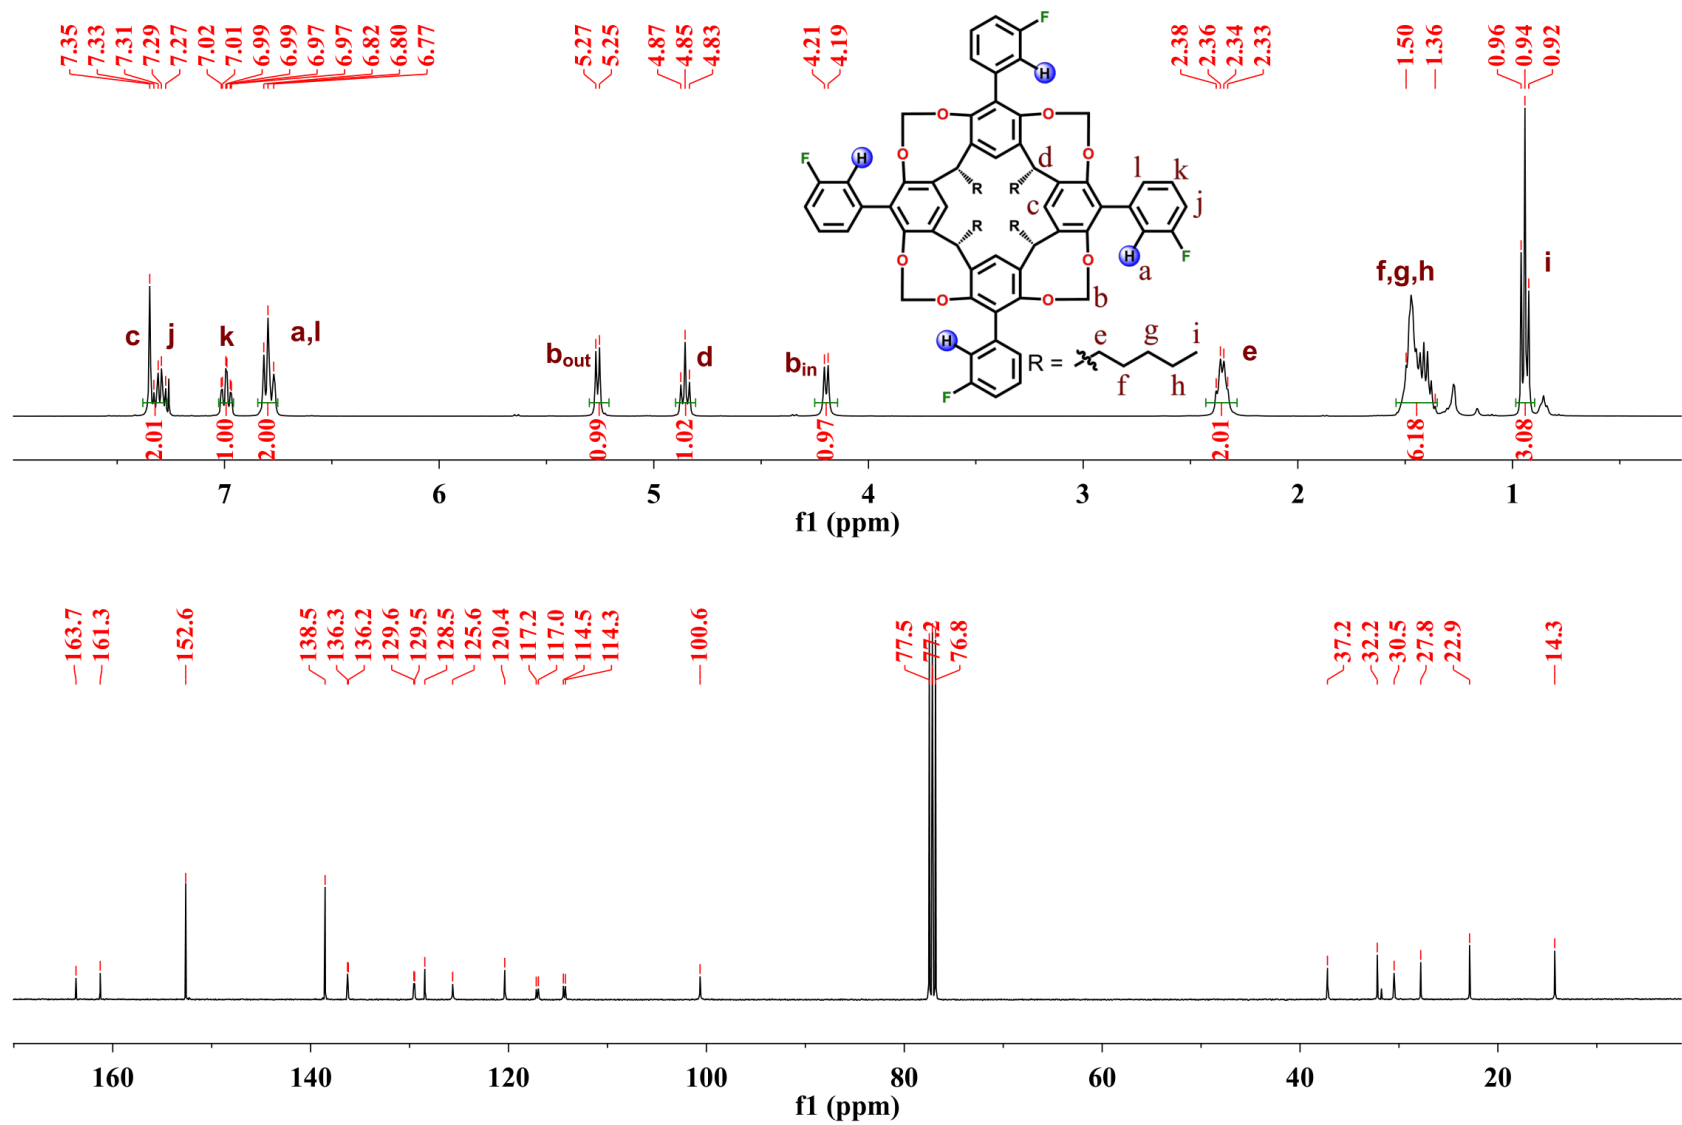

**Figure S20.**  $^1\text{H}$  and  $^{13}\text{C}$  NMR spectra of **3**. Data collected in  $\text{CDCl}_3$  at 20 °C.

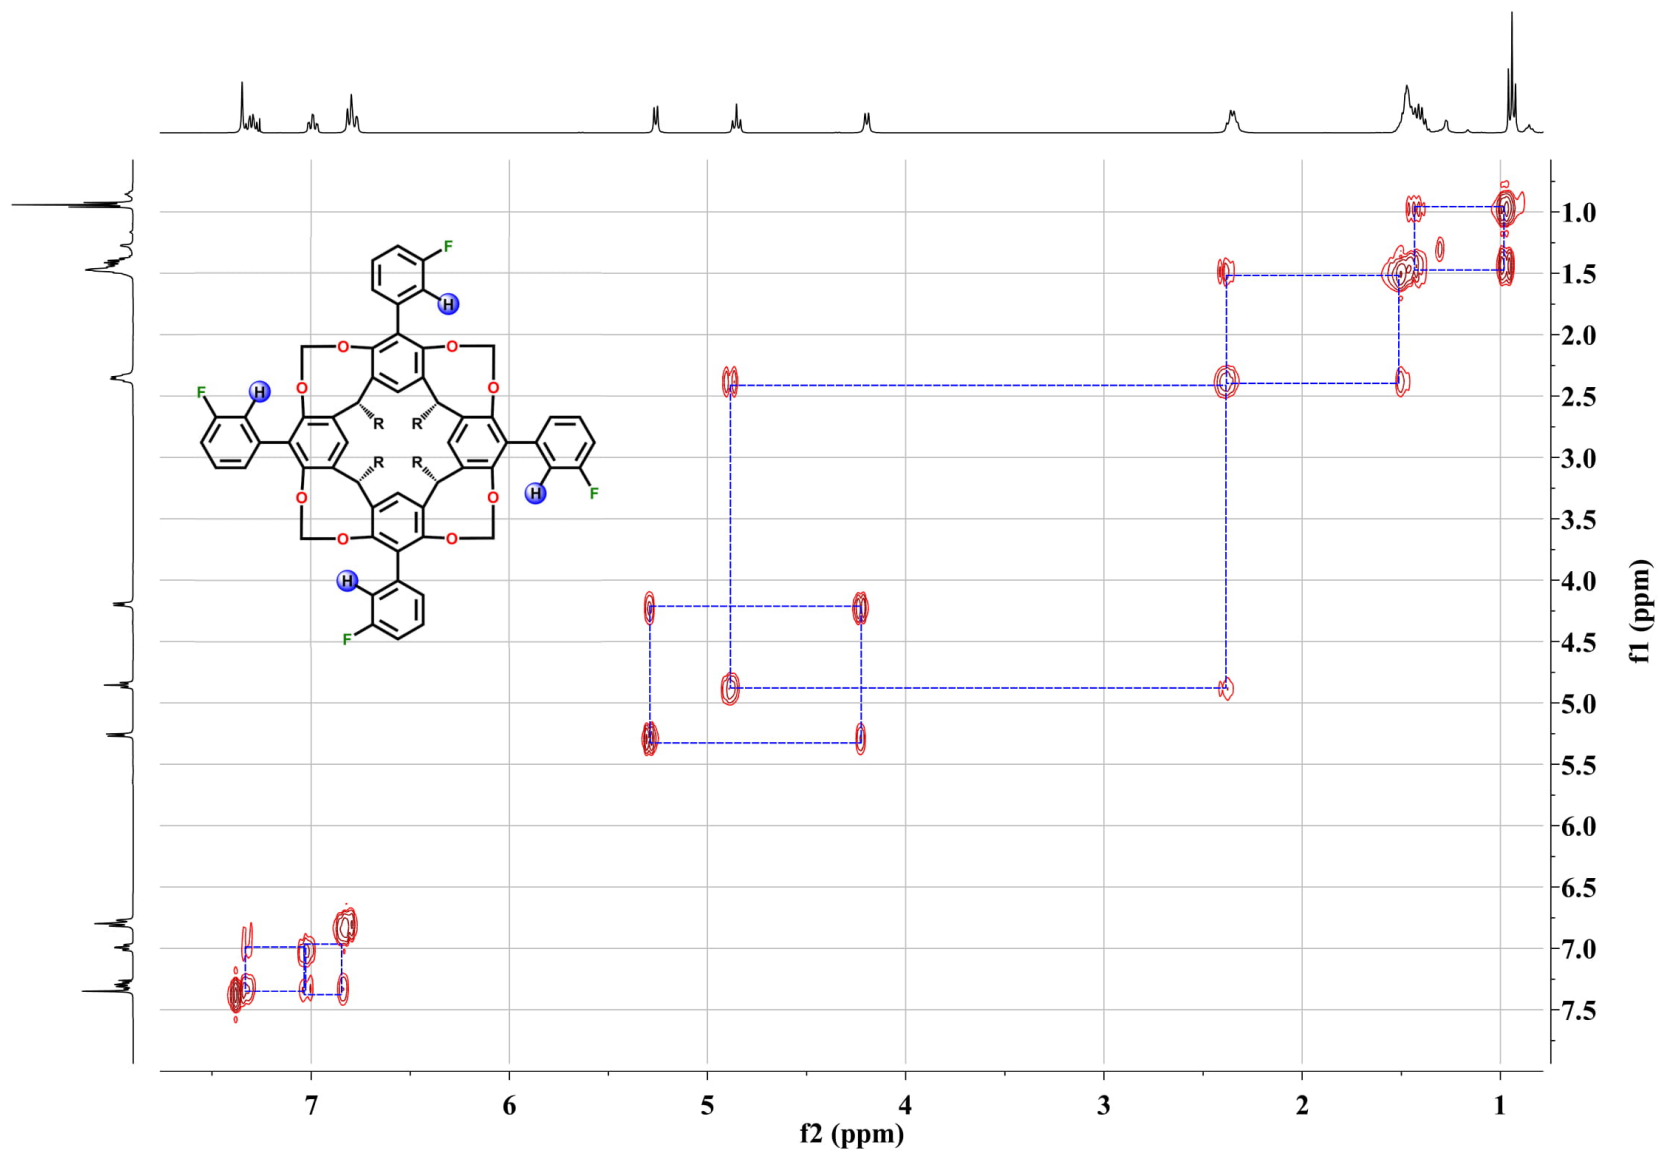

**Figure S21.** COSY NMR spectrum of **3**. Data collected in CDCl<sub>3</sub> at 20 °C.



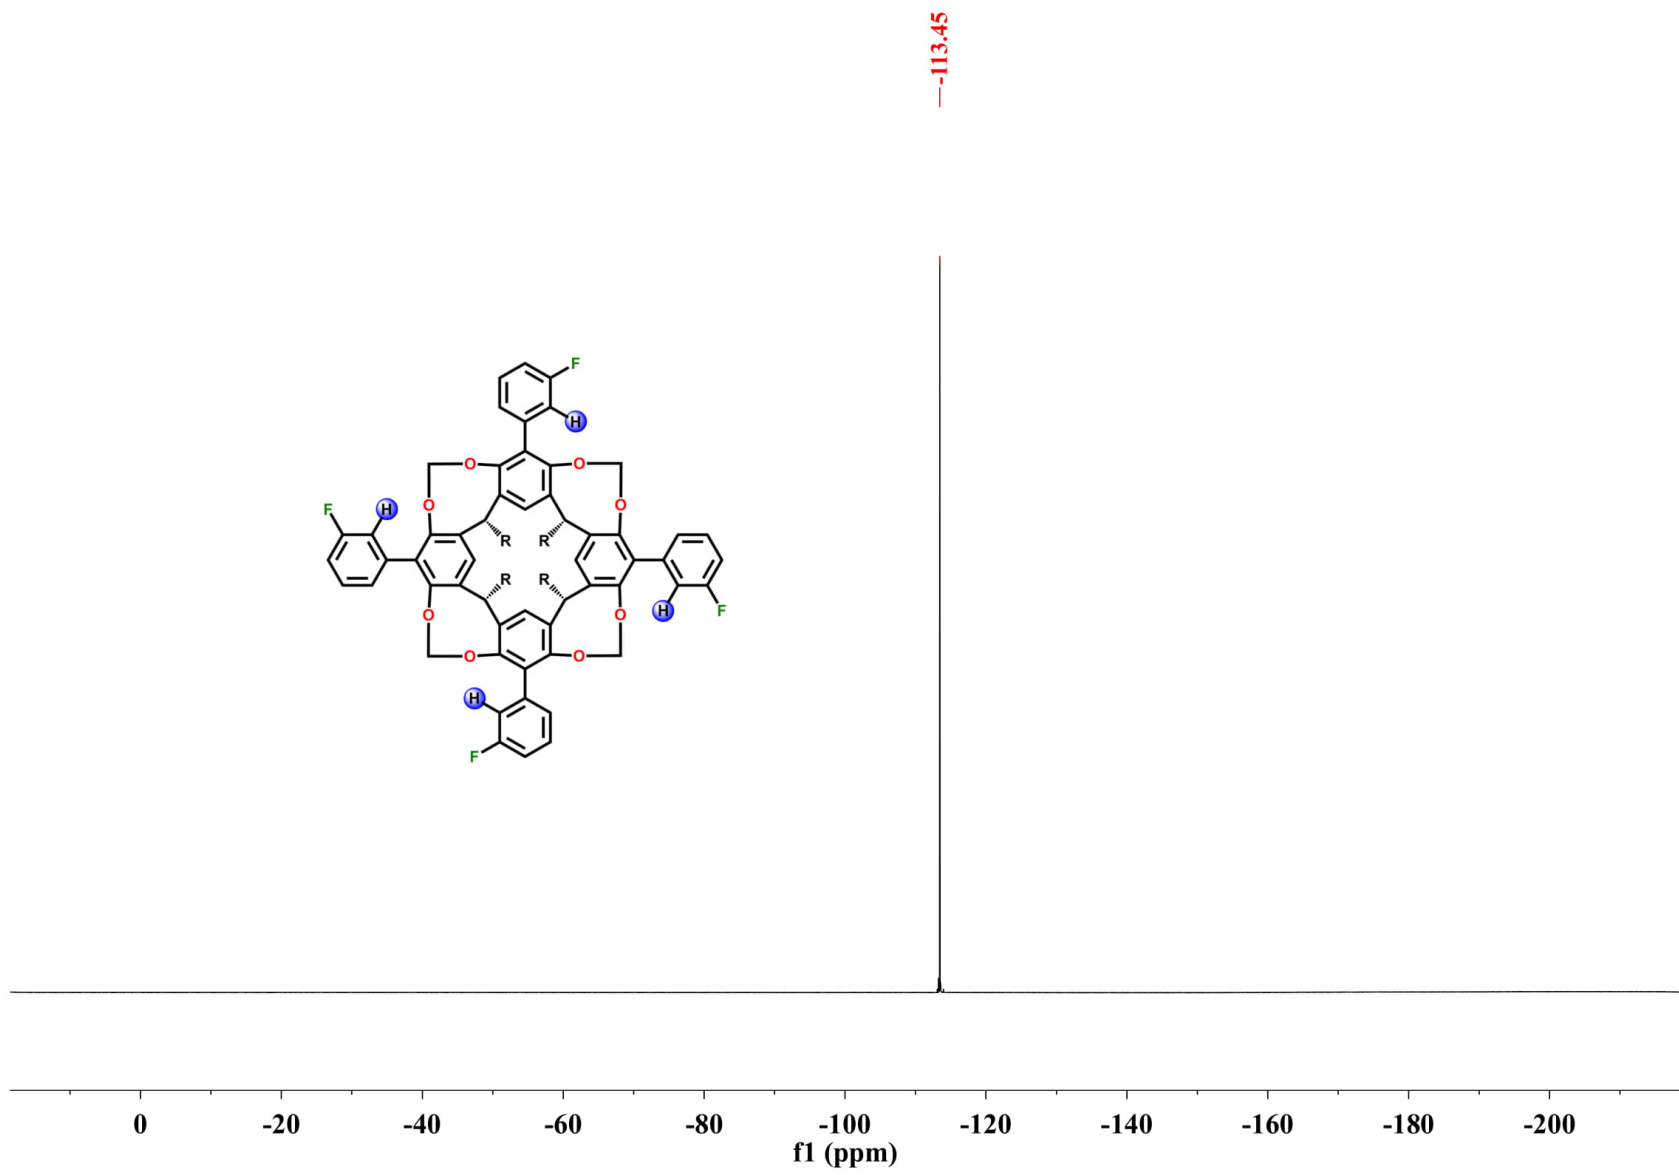

**Figure S22.**  $^{19}\text{F}$  NMR spectrum of **3**. Data collected in  $\text{CDCl}_3$  at 20 °C.

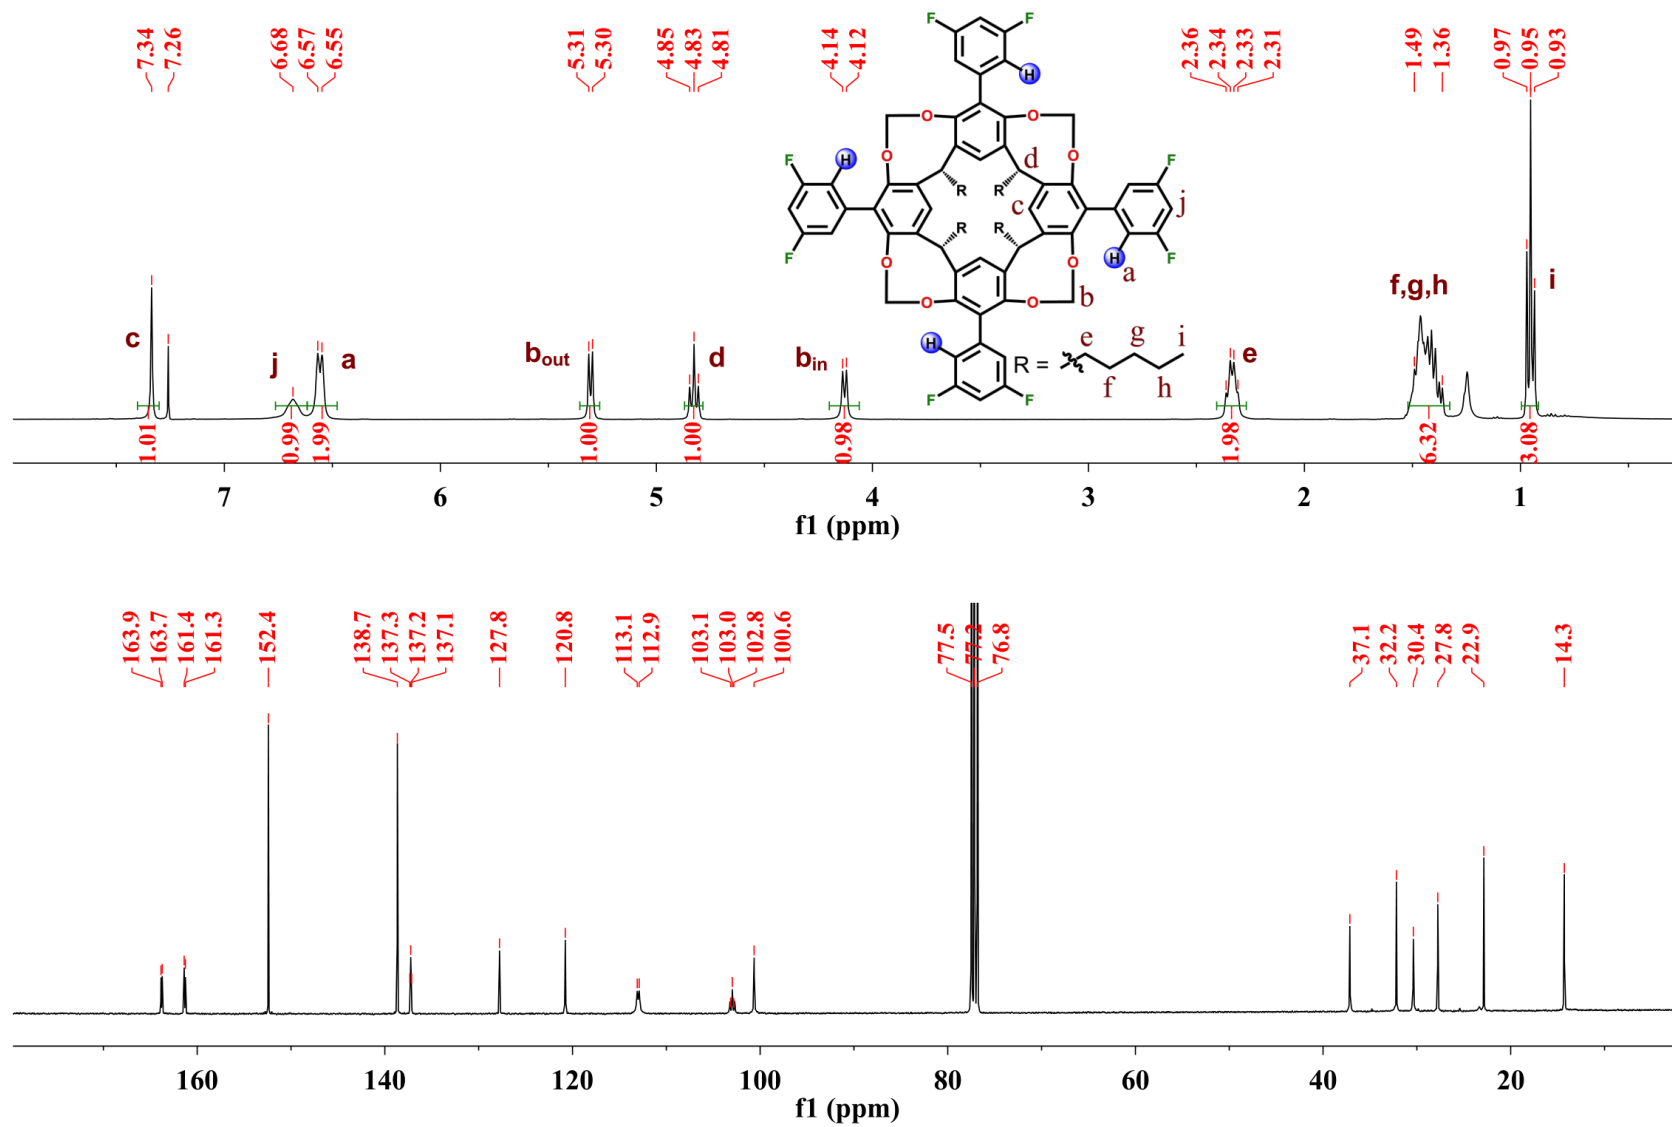

**Figure S23.**  $^1\text{H}$  and  $^{13}\text{C}$  NMR spectra of **4**. Data collected in  $\text{CDCl}_3$  at  $20^\circ\text{C}$ .

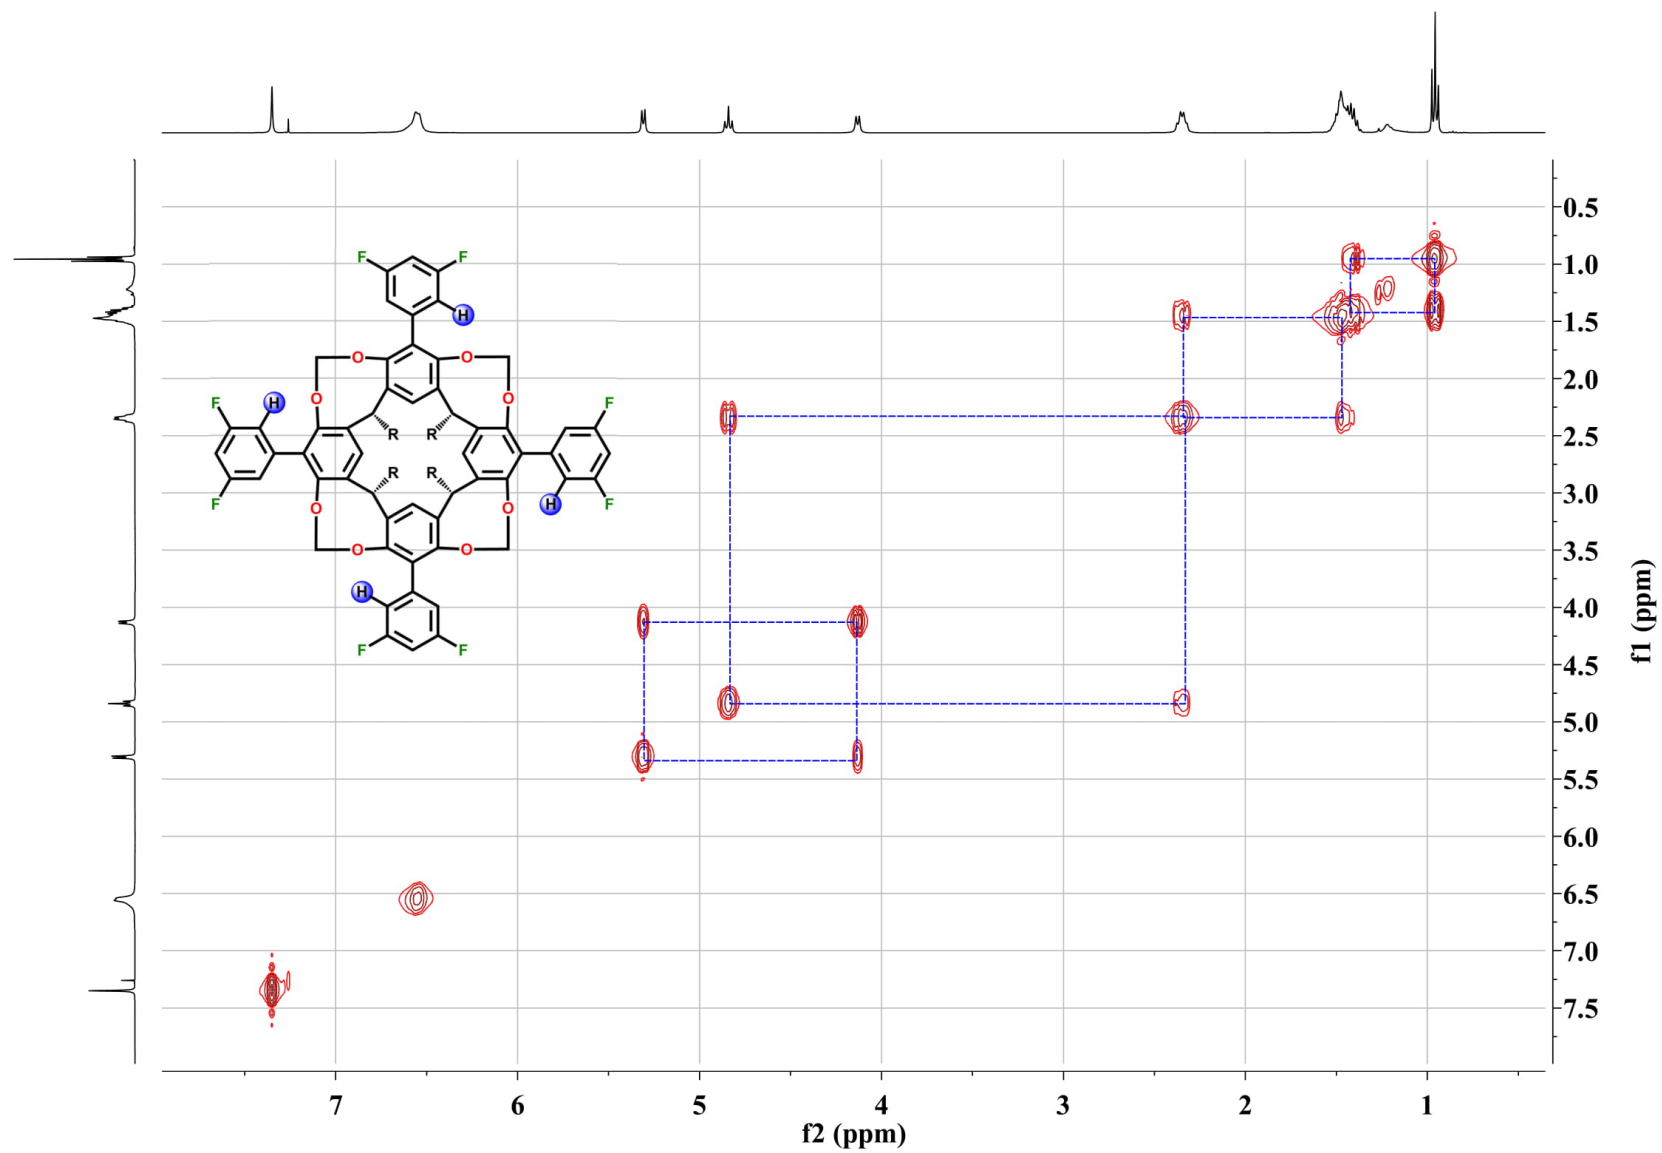

**Figure S24.** COSY NMR spectrum of **4**. Data collected in CDCl<sub>3</sub> at 20 °C.

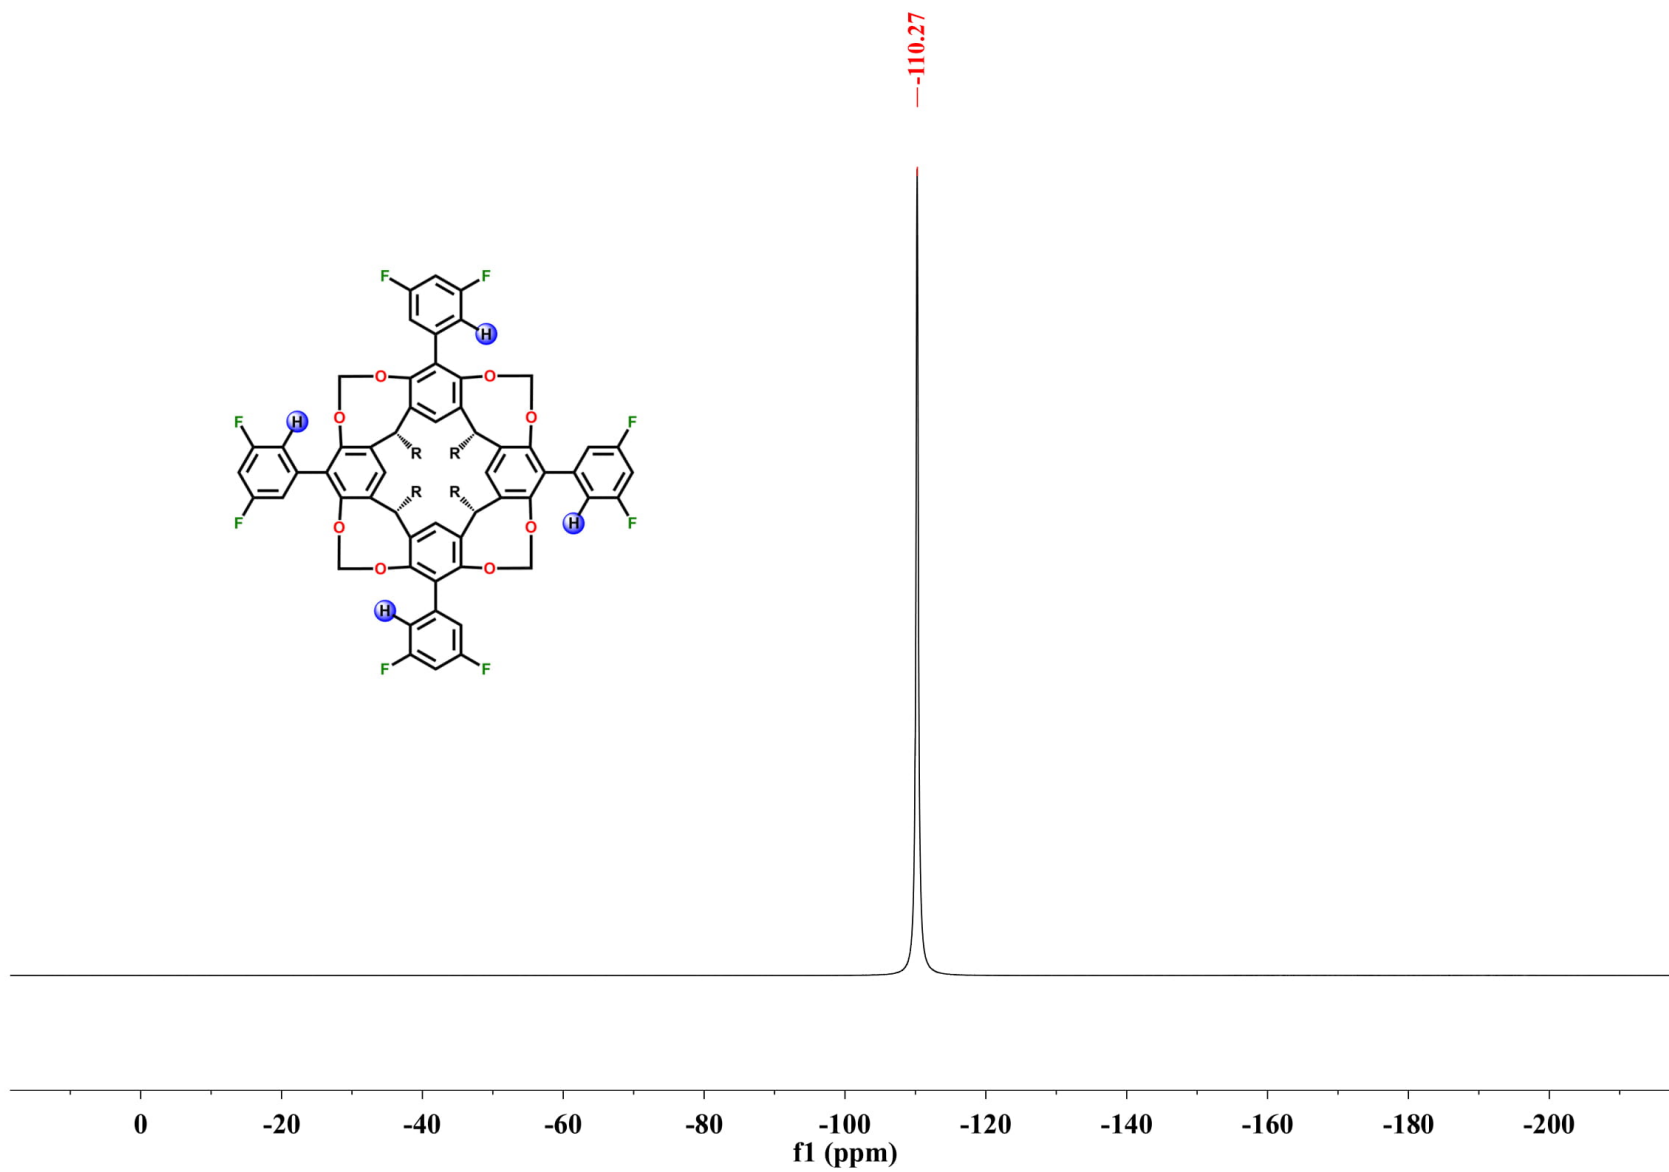

**Figure S25.**  $^{19}\text{F}$  NMR spectrum of **4**. Data collected in  $\text{CDCl}_3$  at 20 °C.

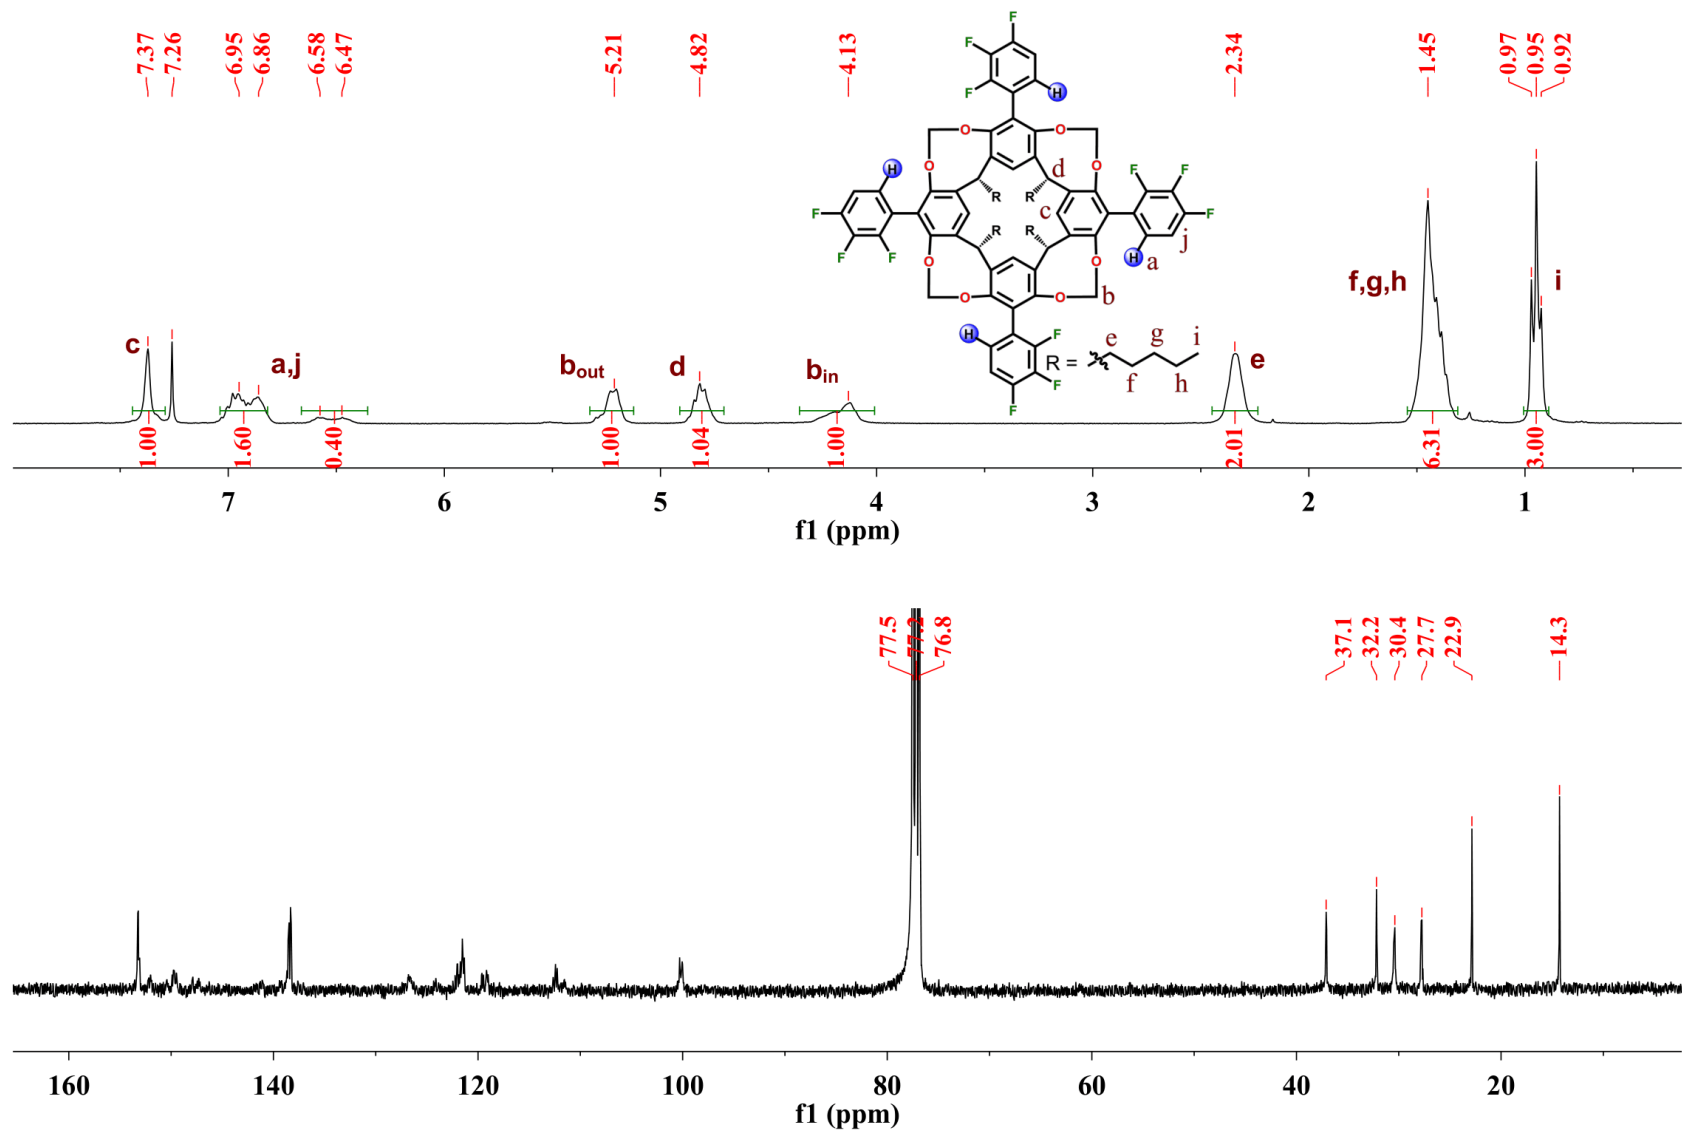

**Figure S26.**  $^1\text{H}$  and  $^{13}\text{C}$  NMR spectra of **5**. Data collected in  $\text{CDCl}_3$  at  $20^\circ\text{C}$ .

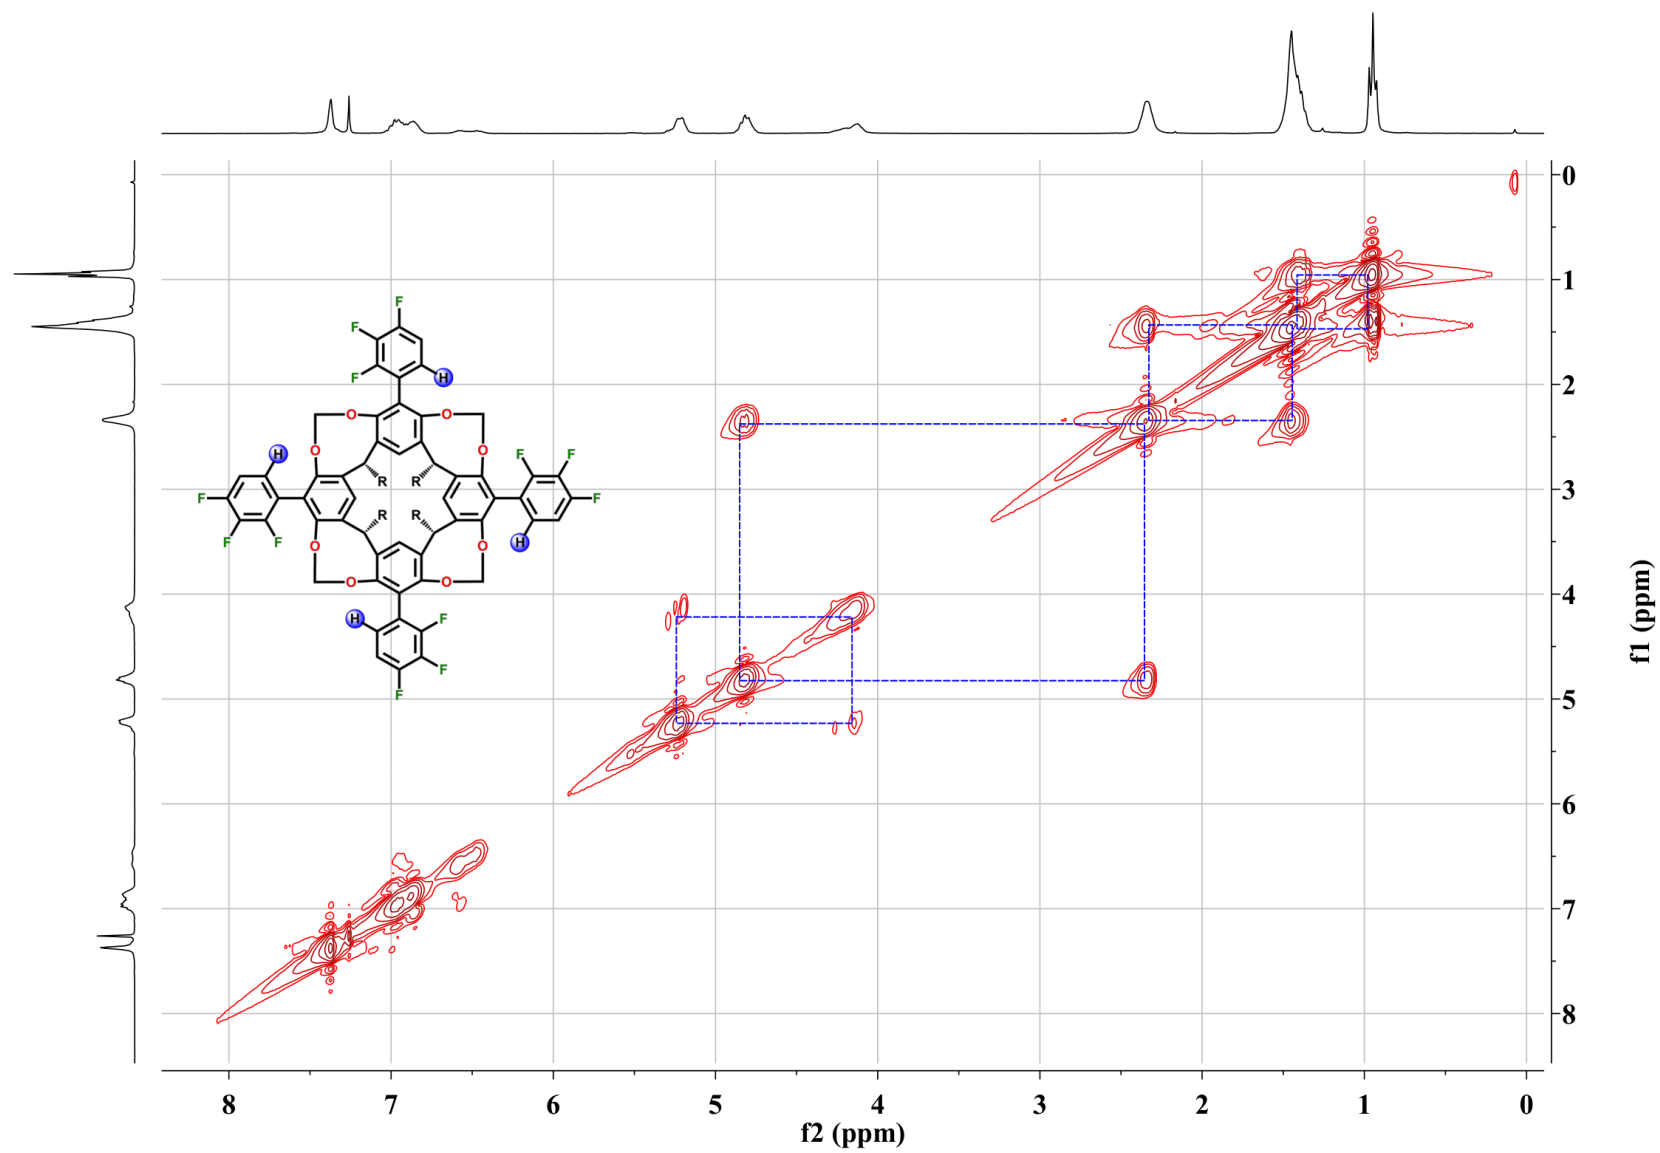

**Figure S27.** COSY NMR spectrum of **5**. Data collected in CDCl<sub>3</sub> at 20 °C.

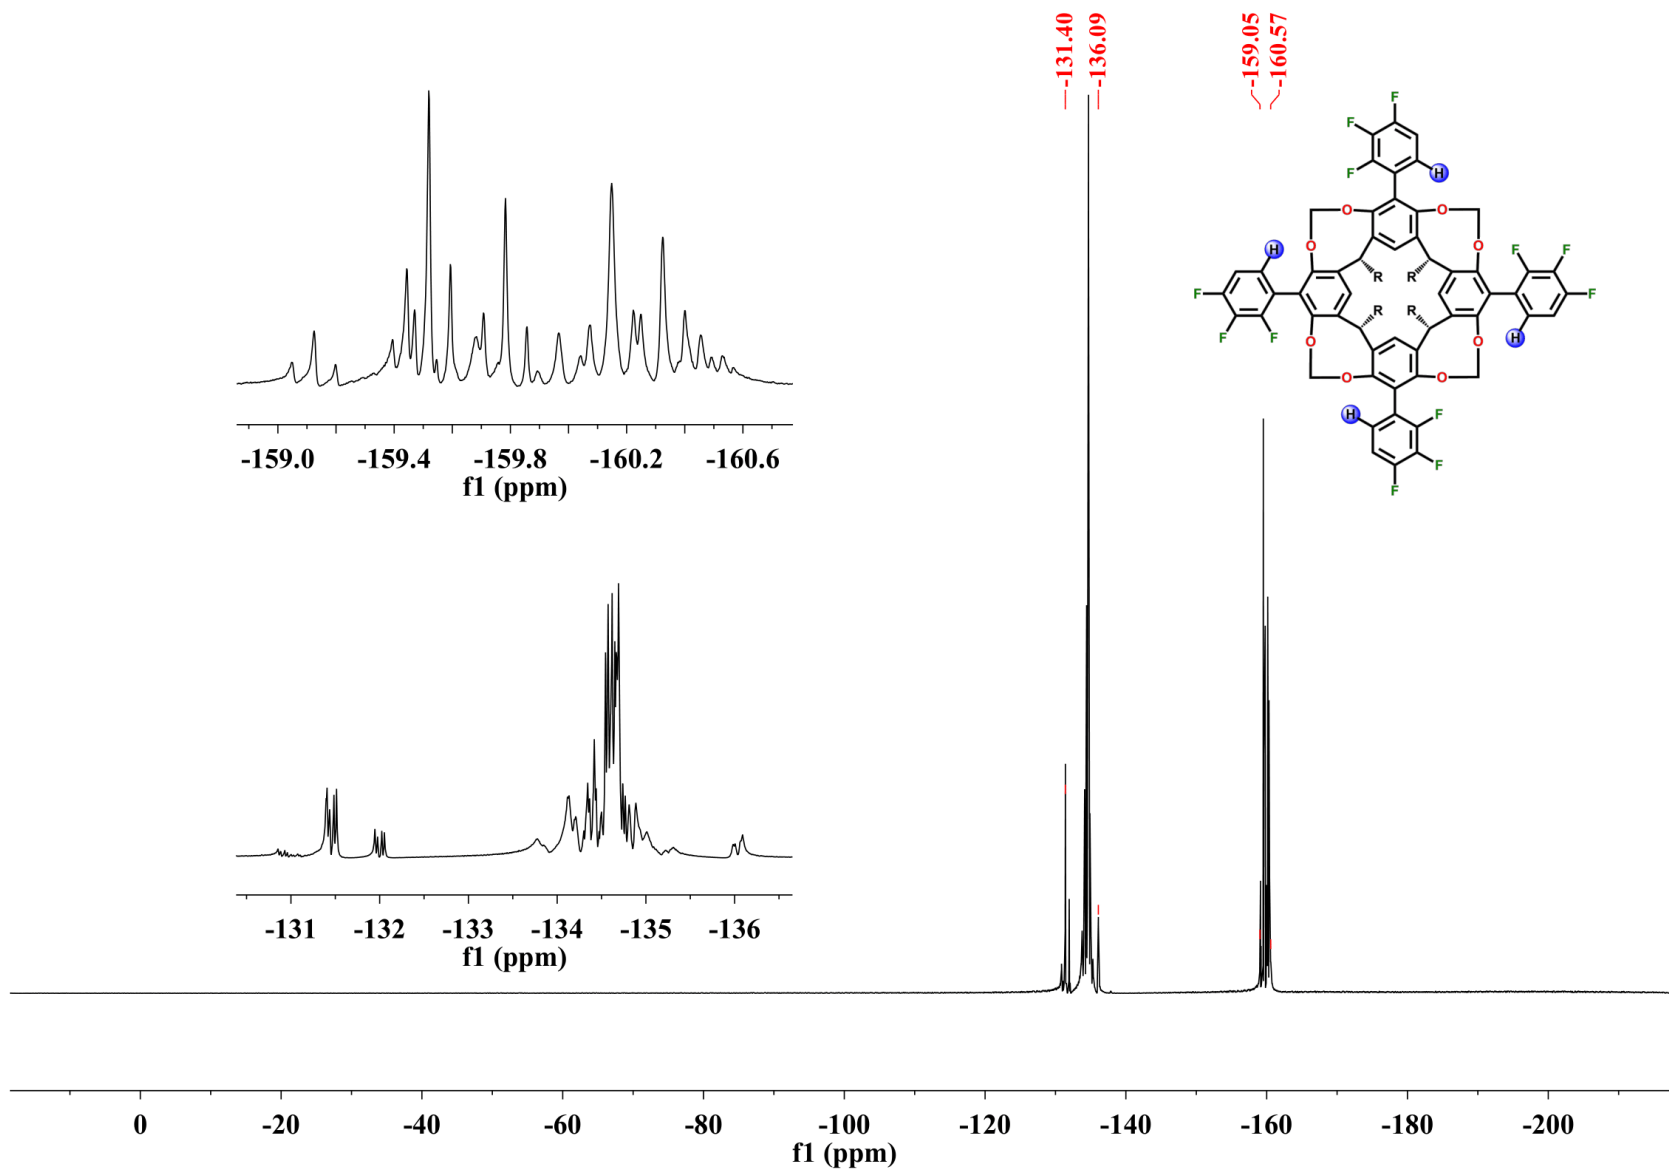

**Figure 28.**  $^{19}\text{F}$  NMR spectrum of **5**. Data collected in  $\text{CDCl}_3$  at 20  $^\circ\text{C}$ .

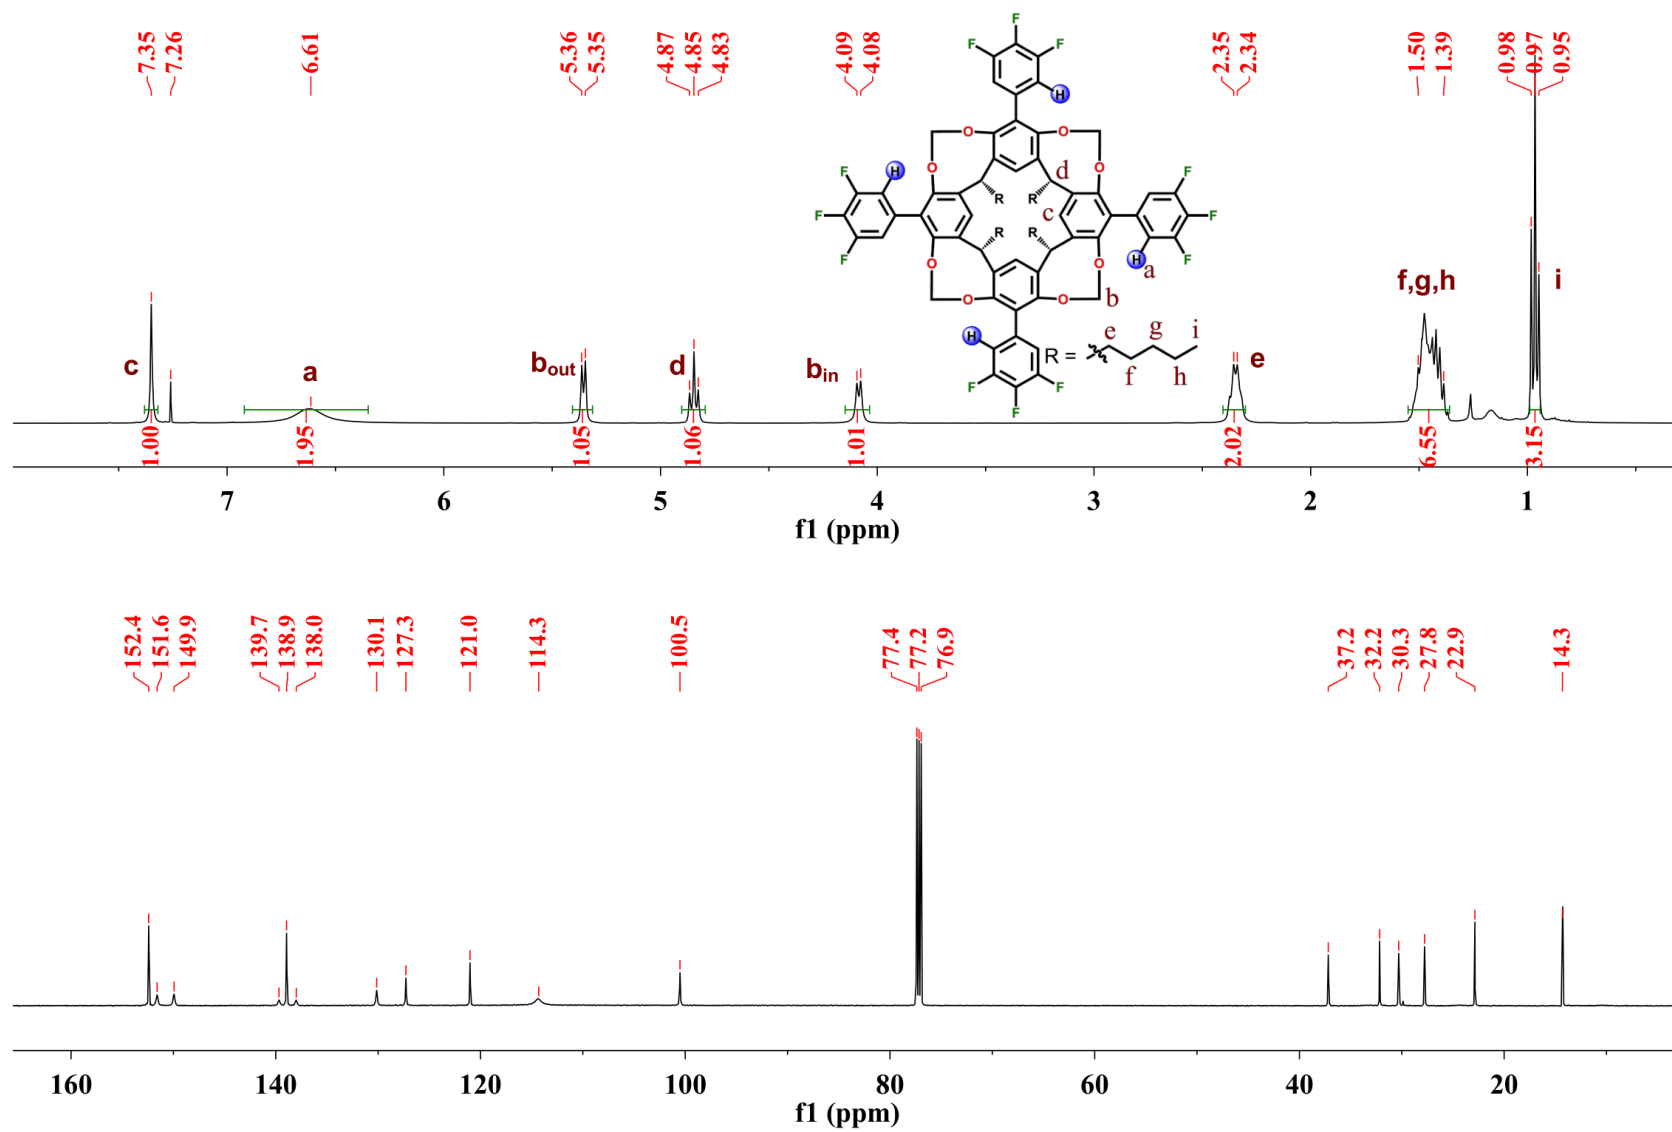

**Figure S29.**  $^1\text{H}$  and  $^{13}\text{C}$  NMR spectra of **6**. Data collected in CDCl<sub>3</sub> at 20 °C.



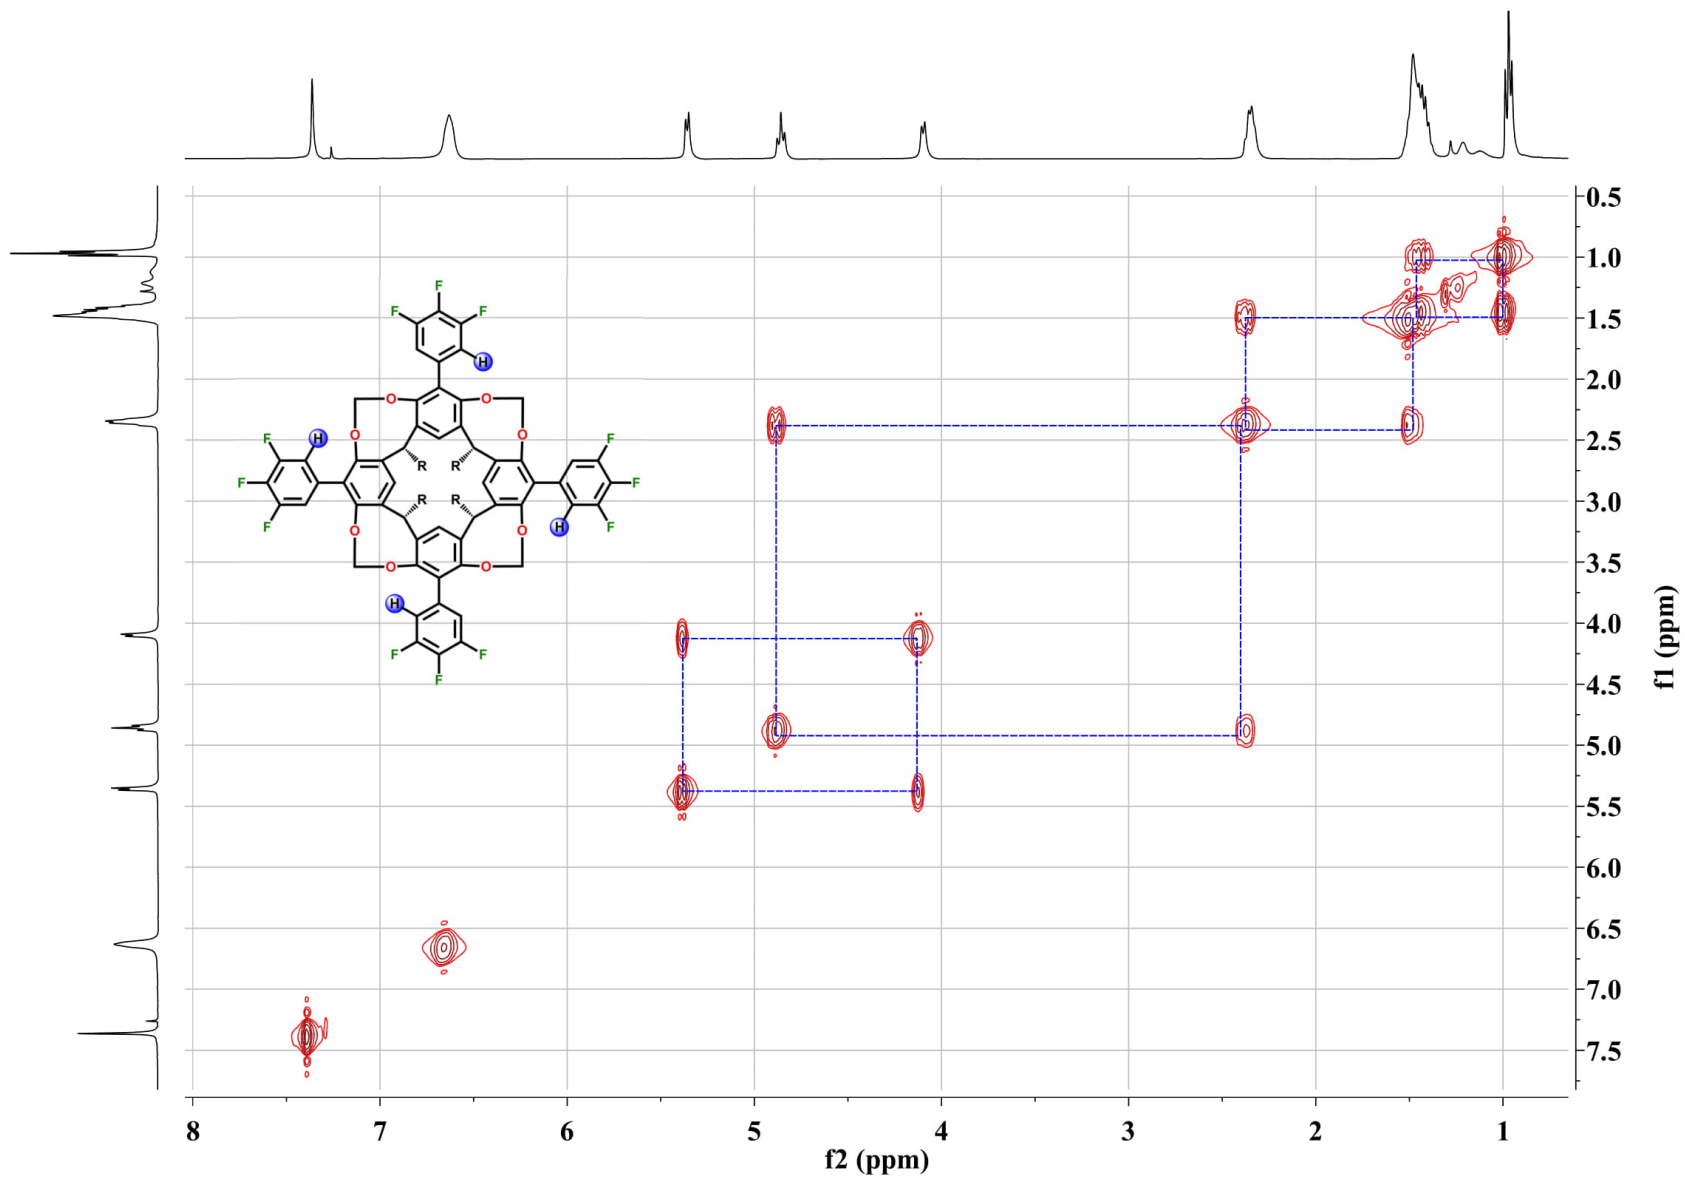

**Figure S30.** COSY NMR spectrum of **6**. Data collected in CDCl<sub>3</sub> at 20 °C.

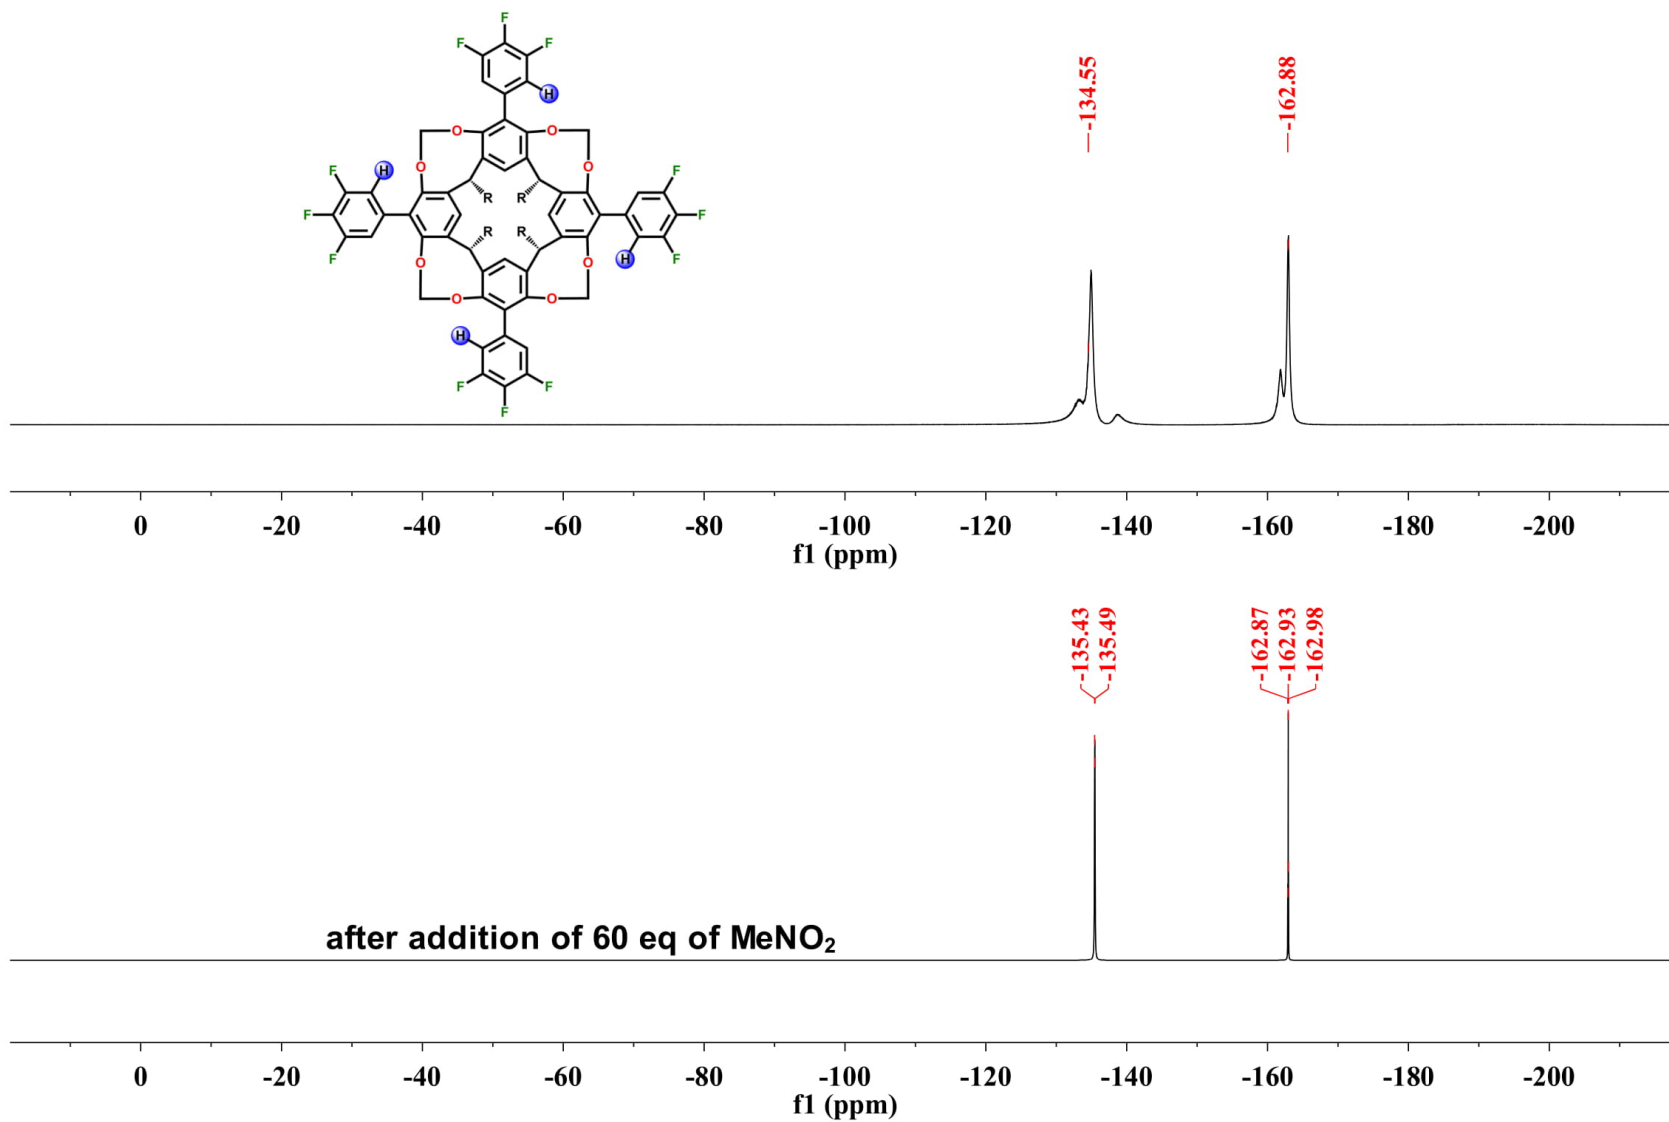

**Figure S31.**  $^{19}\text{F}$  NMR spectra of **6**. Data collected in  $\text{CDCl}_3$  at 20 °C.

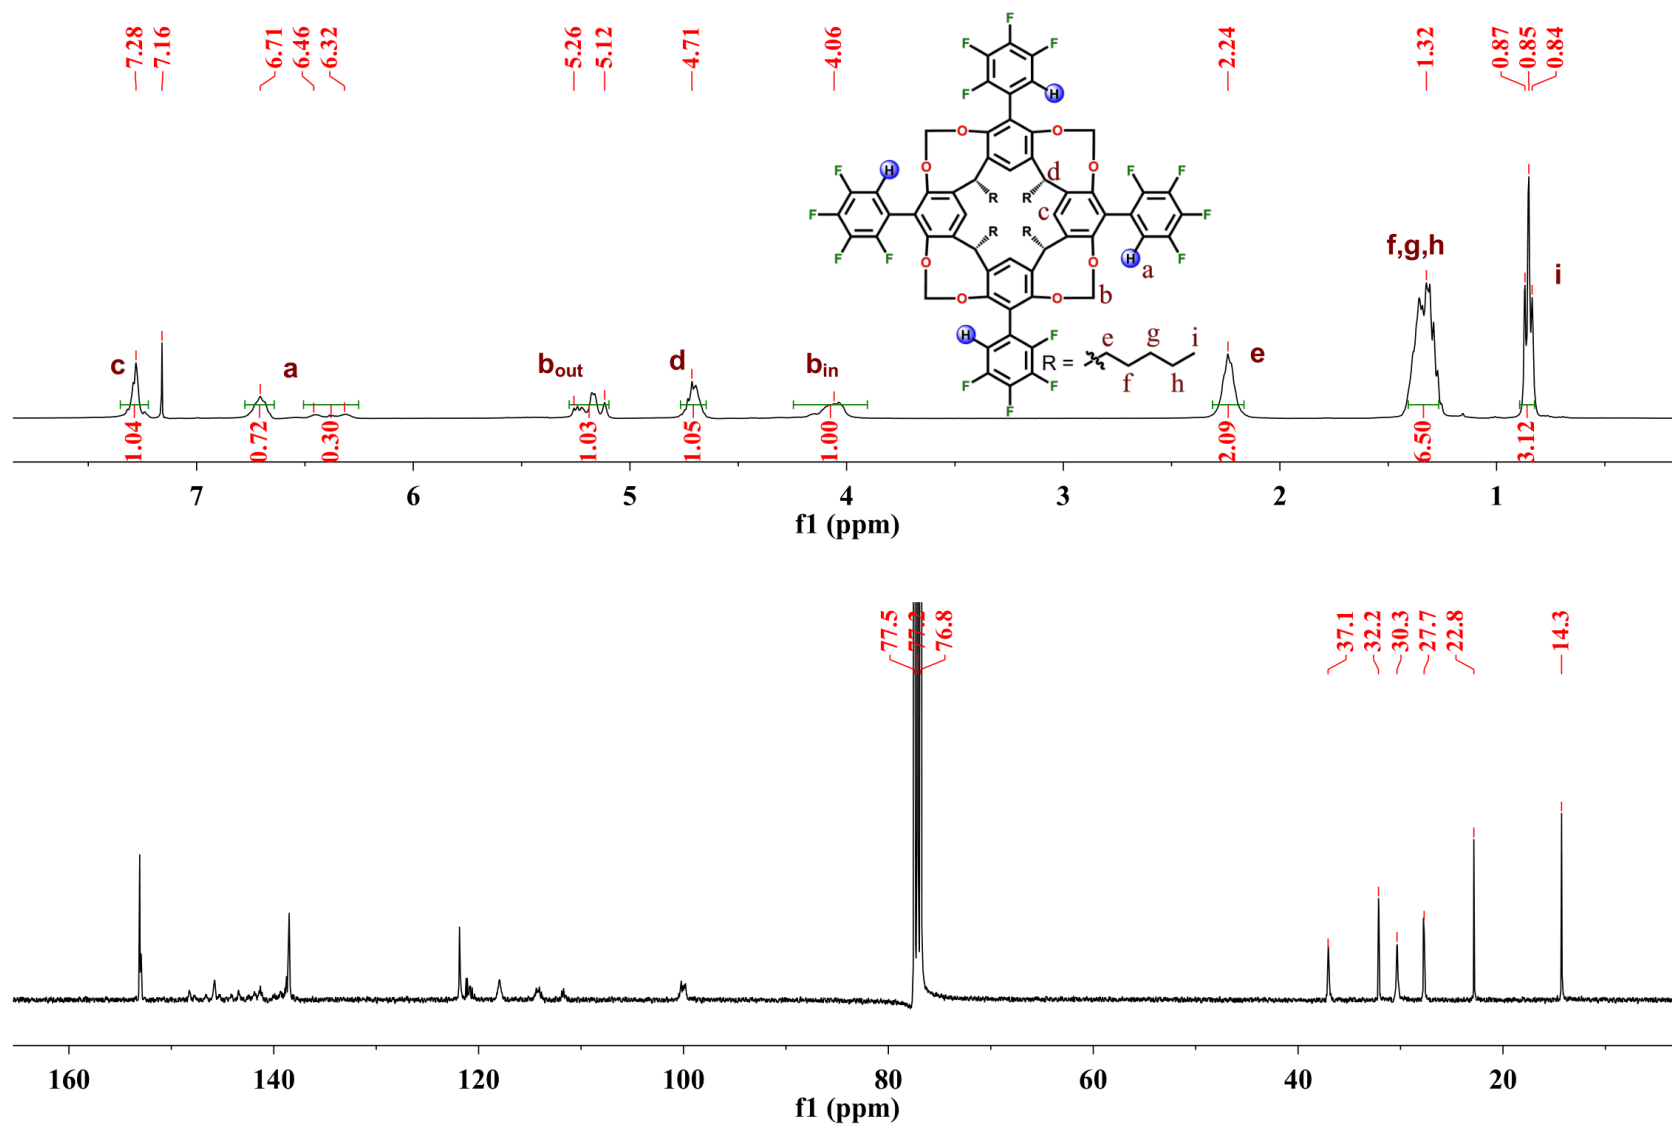

**Figure S32.**  $^1\text{H}$  and  $^{13}\text{C}$  NMR spectra of **7**. Data collected in CDCl<sub>3</sub> at 20 °C.

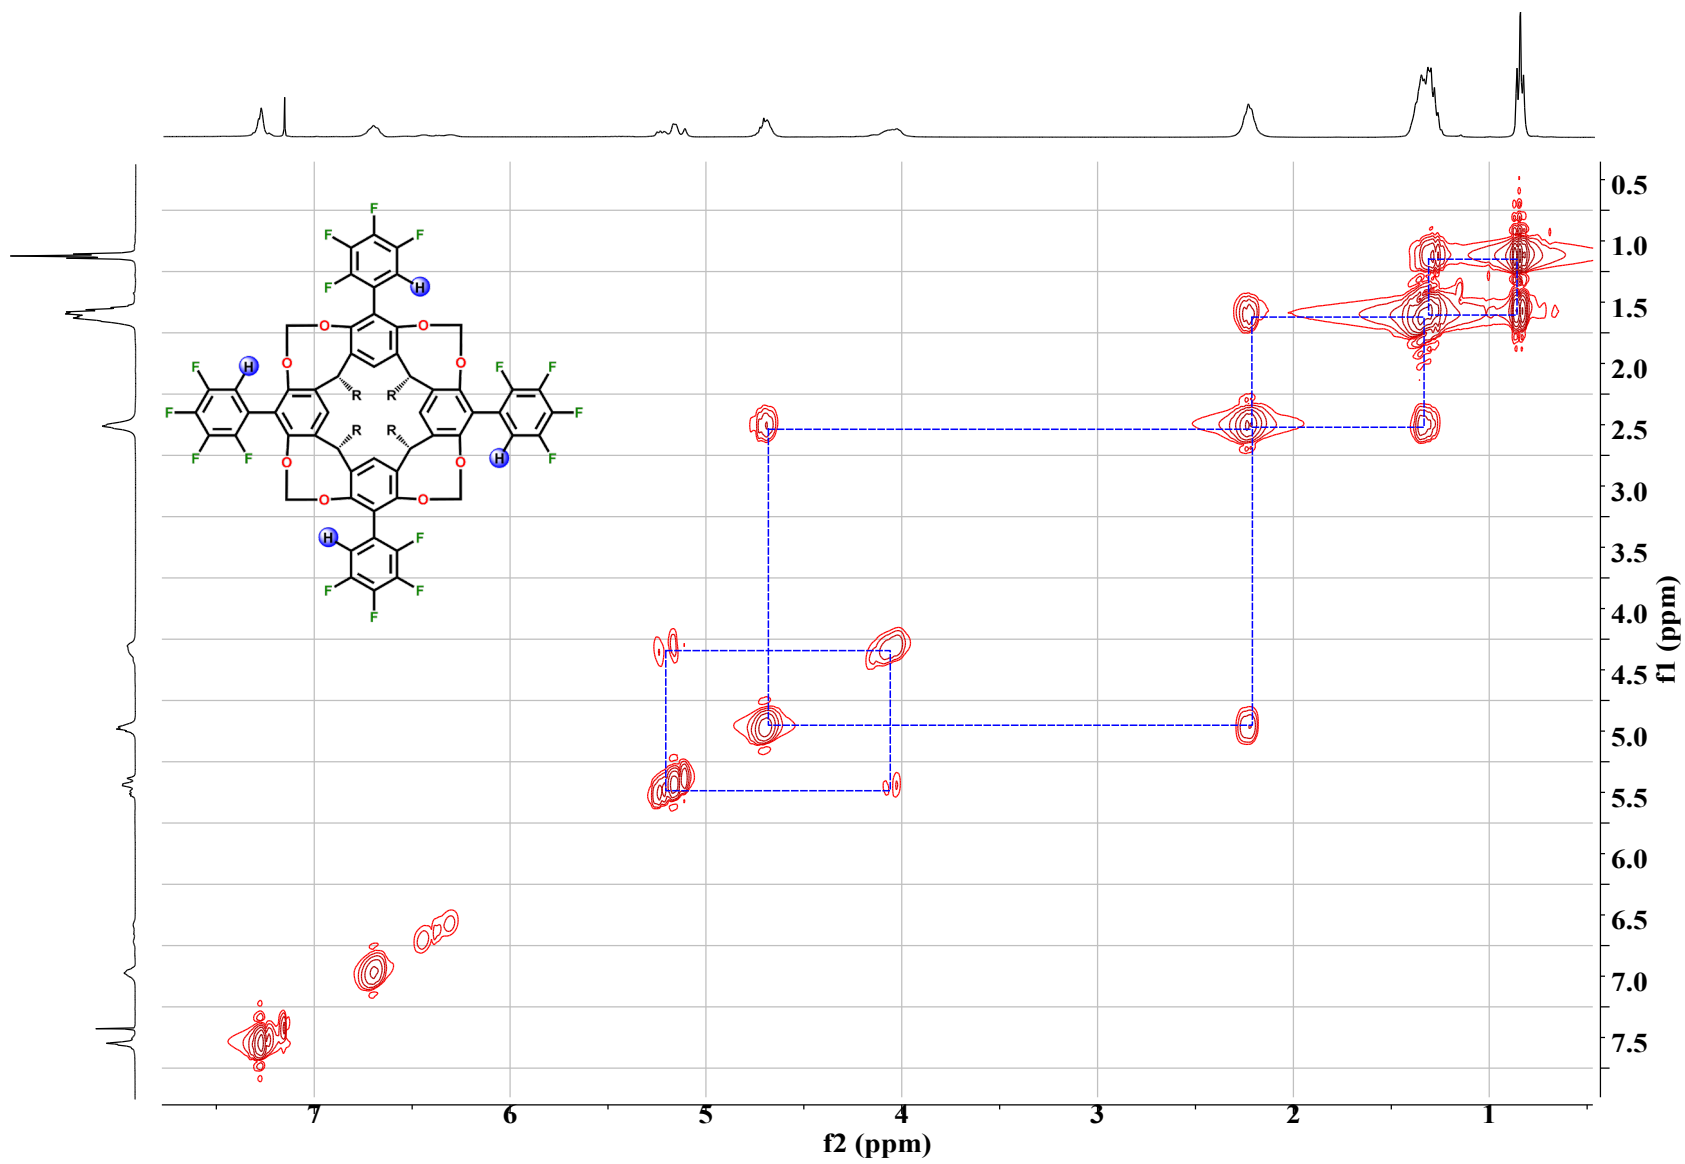

**Figure S33.** COSY NMR spectrum of **7**. Data collected in CDCl<sub>3</sub> at 20 °C.

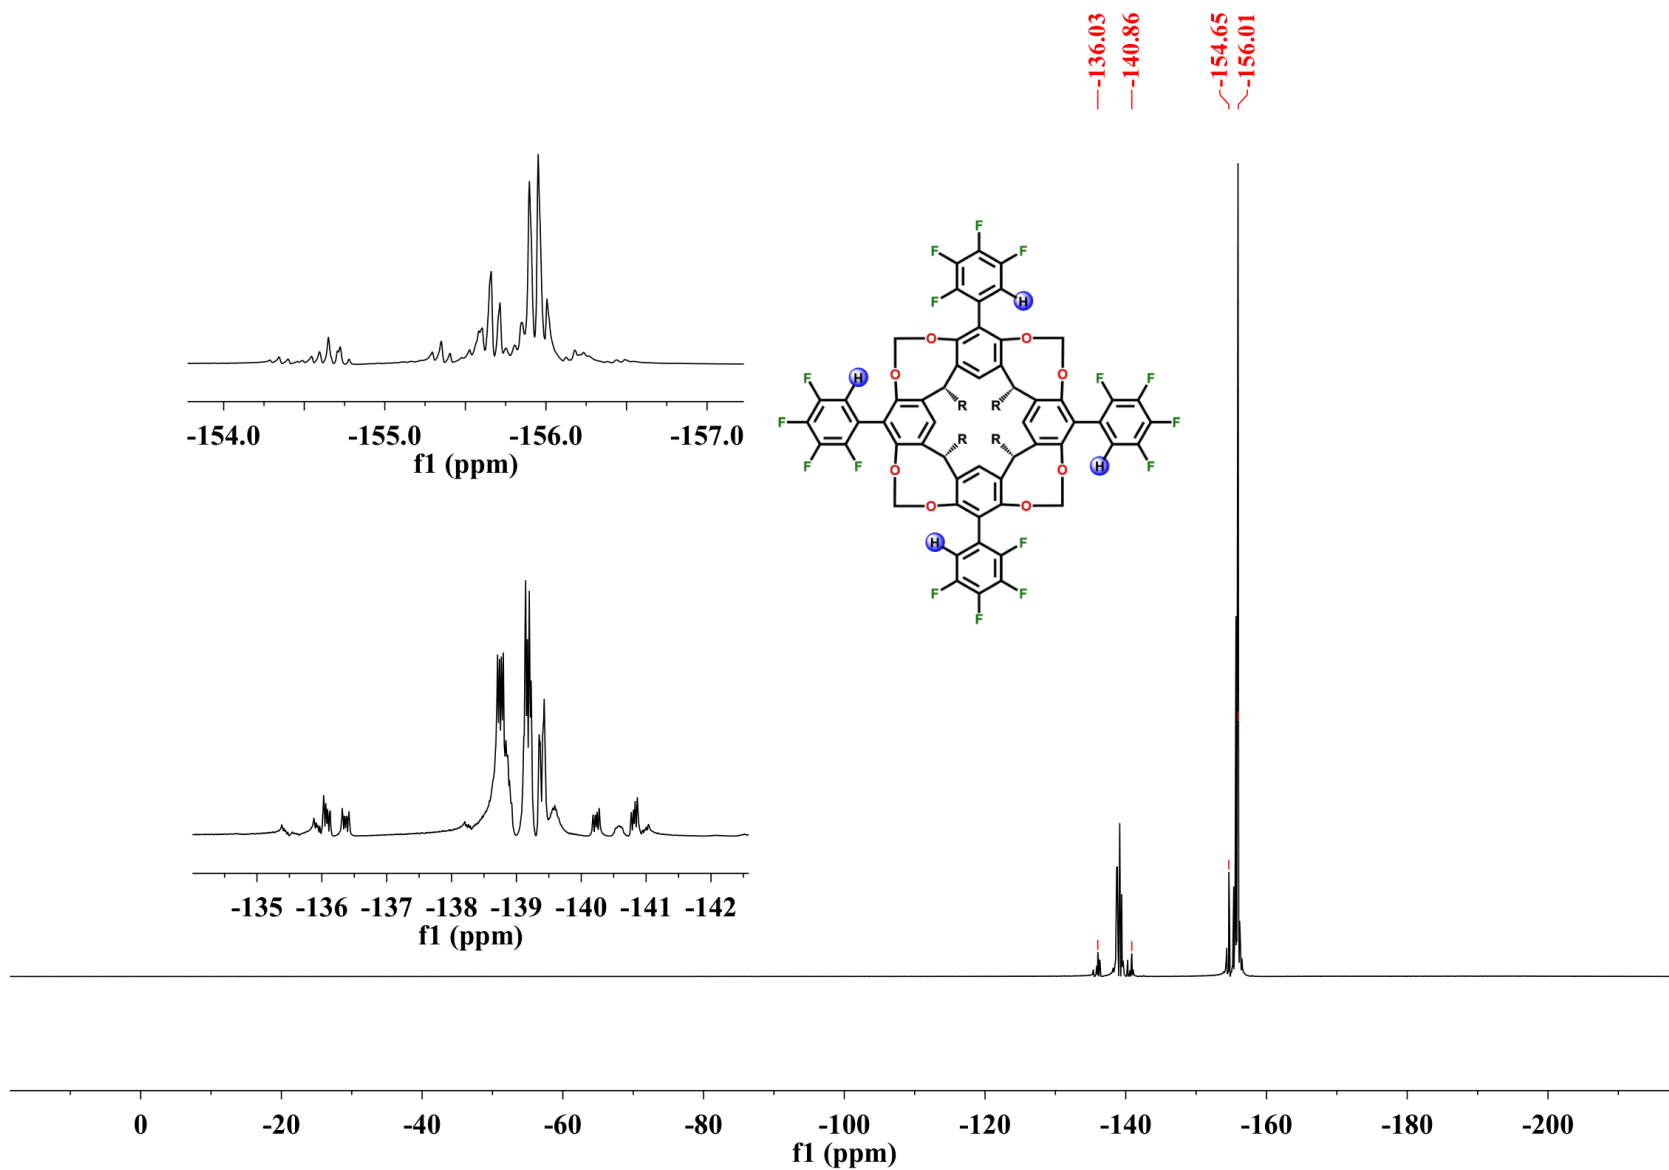

**Figure S34.**  $^{19}\text{F}$  NMR spectrum of 7. Data collected in  $\text{CDCl}_3$  at 20  $^\circ\text{C}$ .

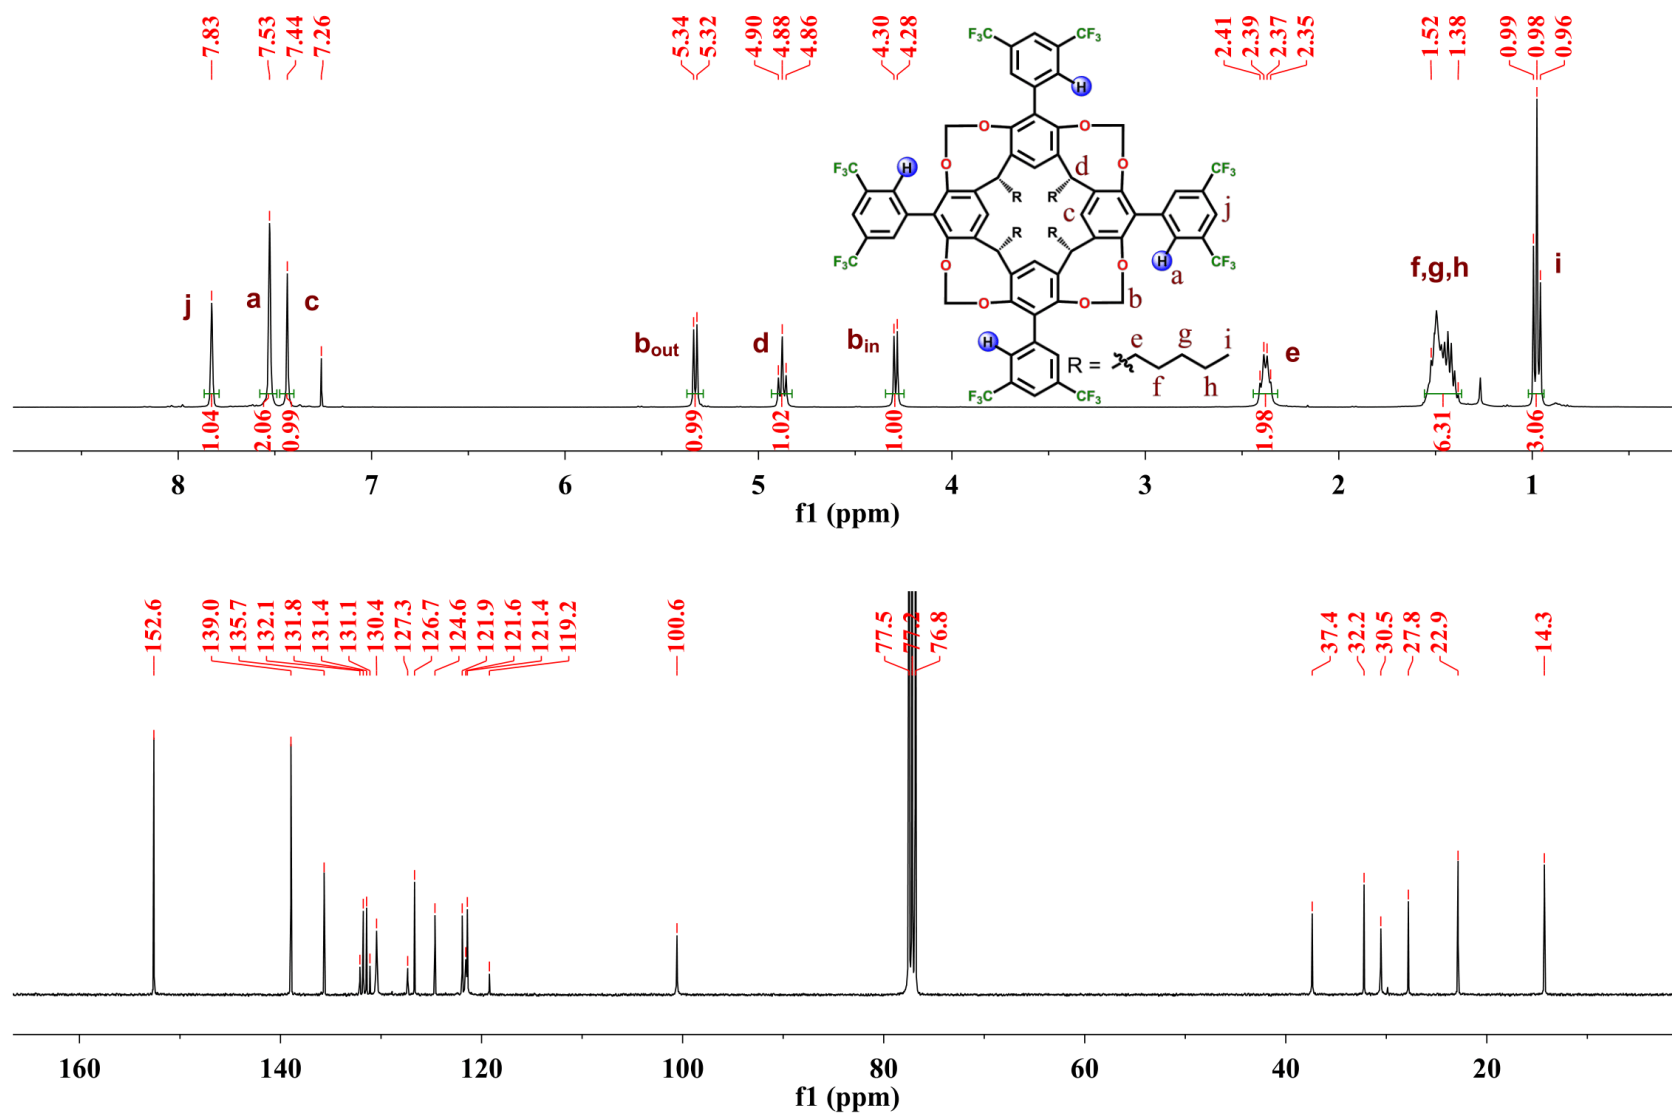

**Figure S35.**  $^1\text{H}$  and  $^{13}\text{C}$  NMR spectra of **8**. Data collected in  $\text{CDCl}_3$  at 20 °C.

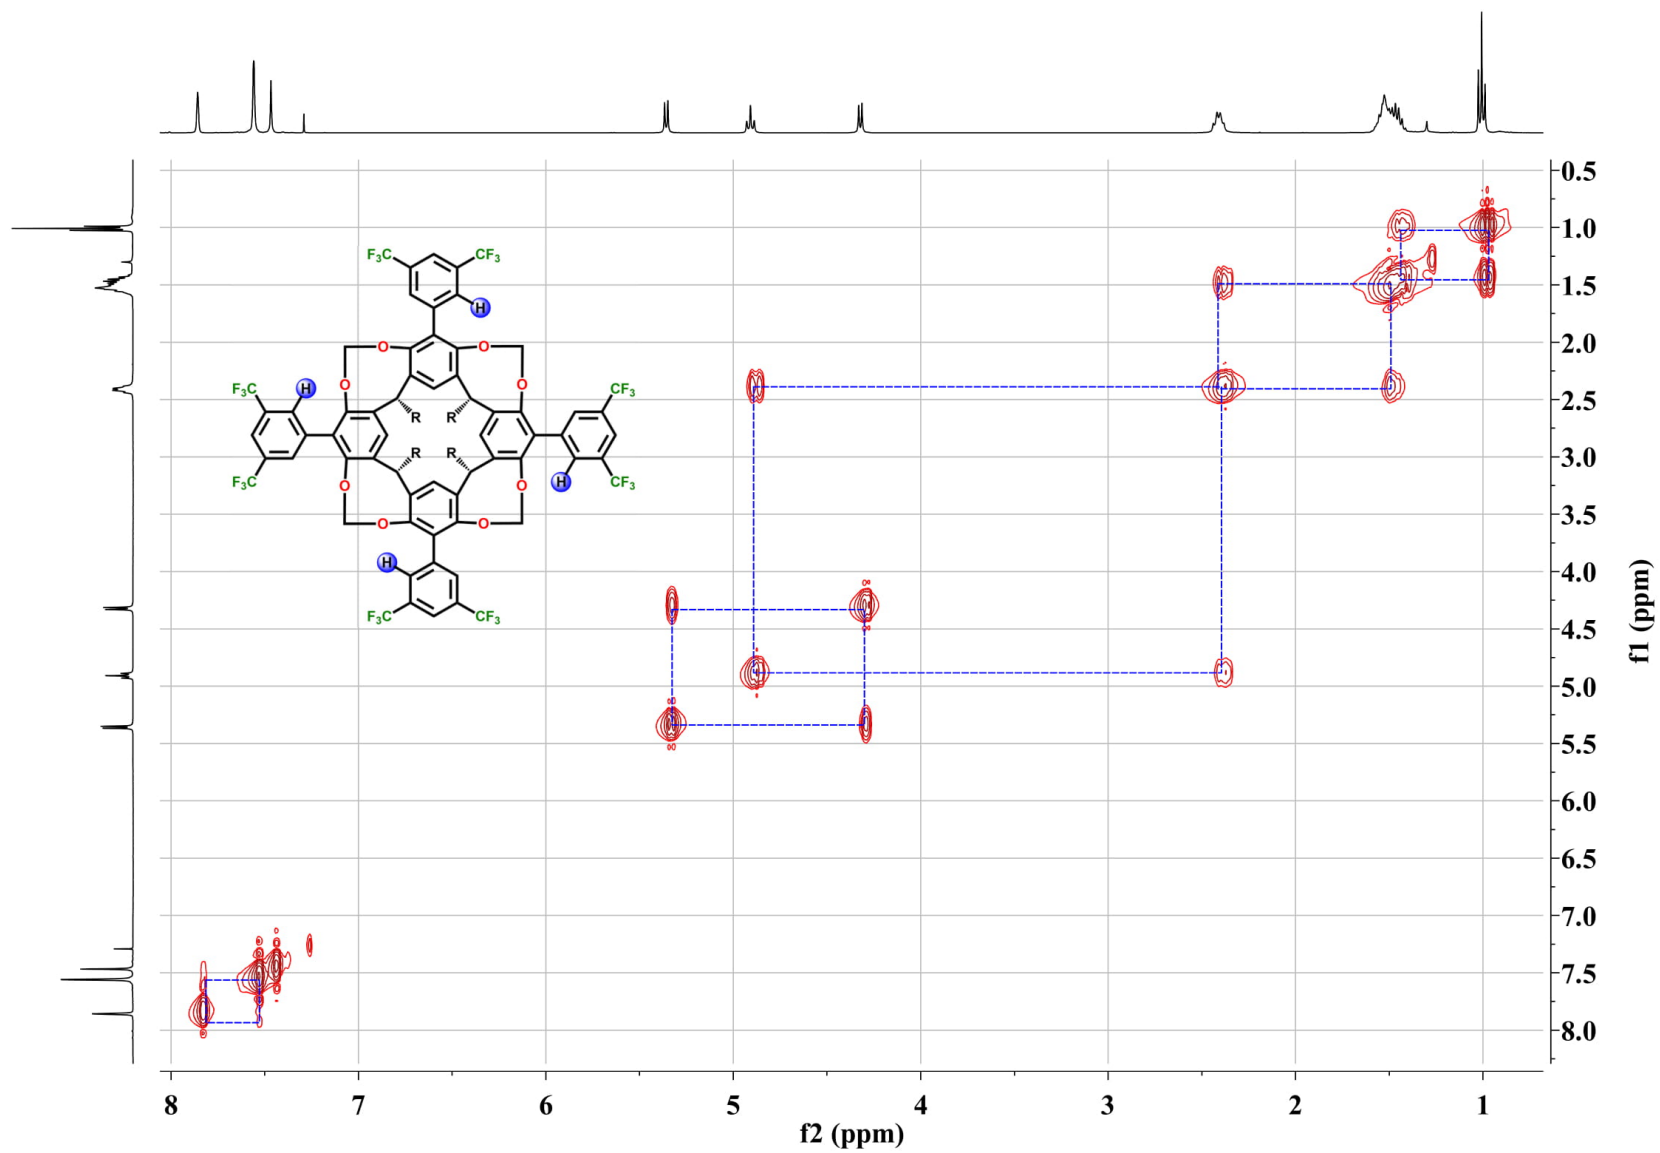

**Figure S36.** COSY NMR spectrum of **8**. Data collected in CDCl<sub>3</sub> at 20 °C.

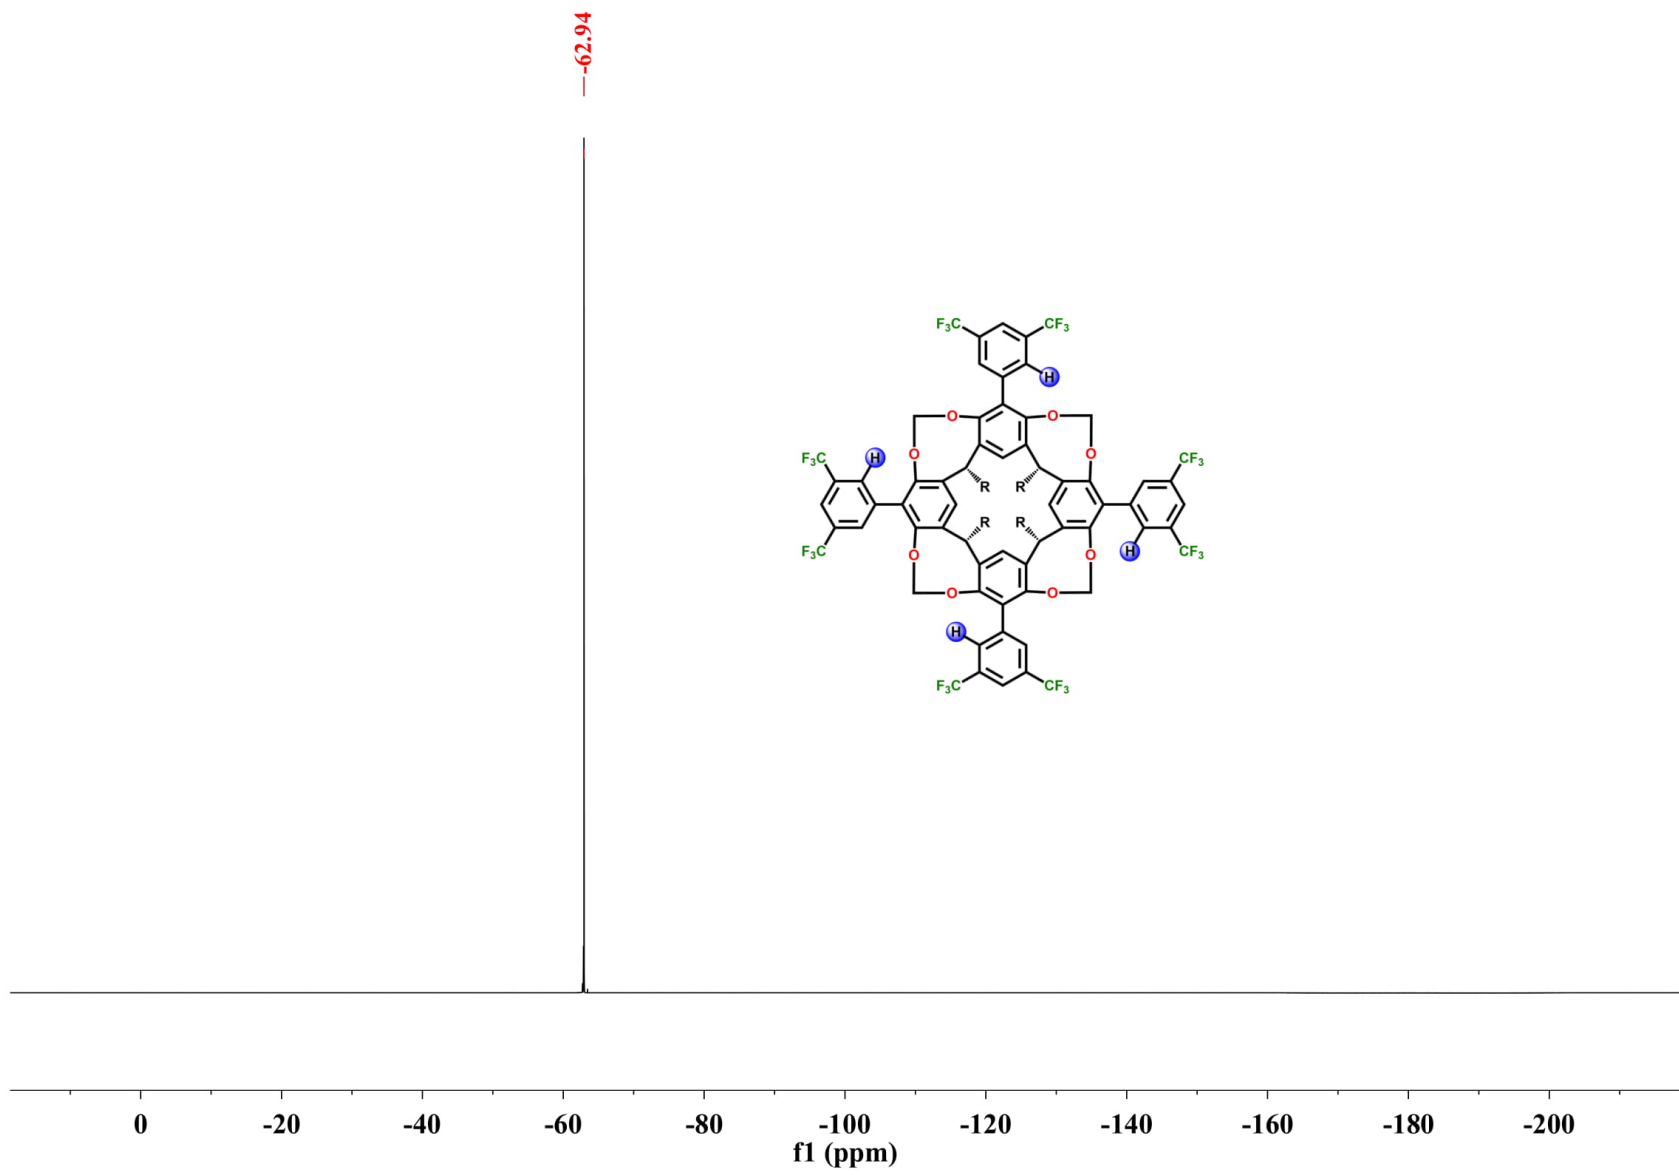

**Figure S37.**  $^{19}\text{F}$  NMR spectrum of **8**. Data collected in  $\text{CDCl}_3$  at 20 °C.



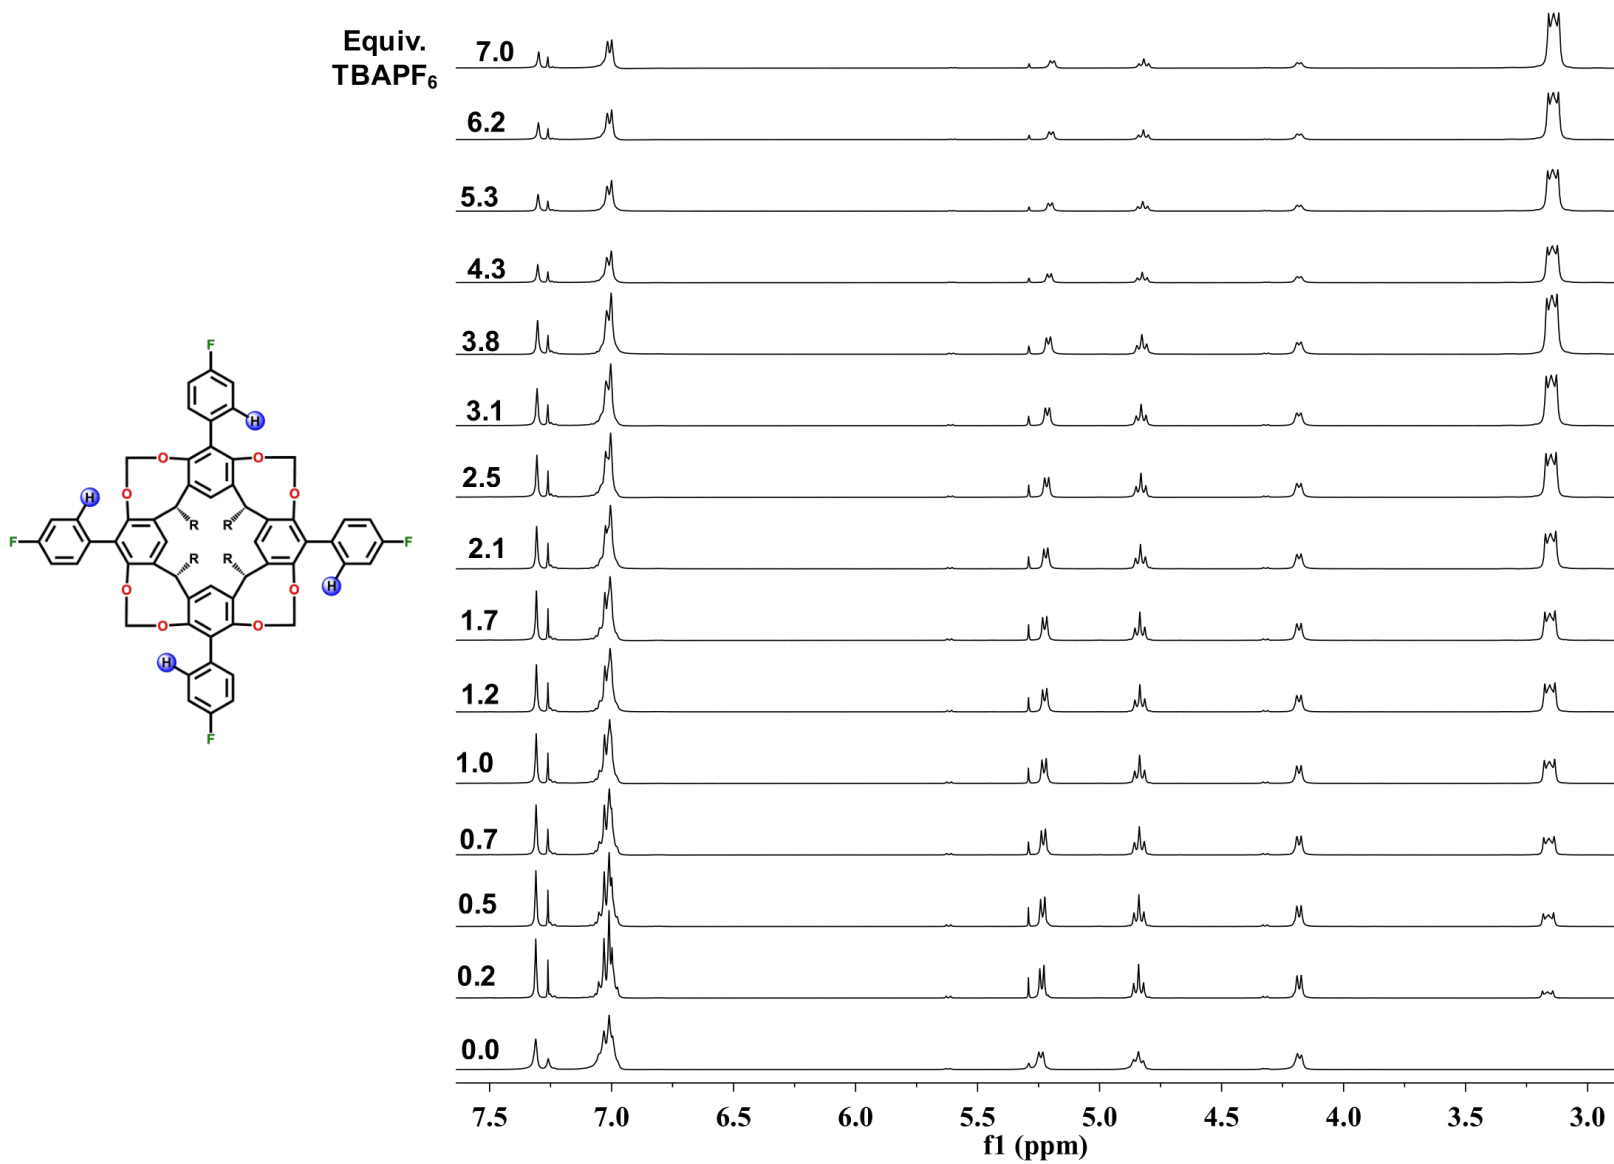

**Figure S38.** <sup>1</sup>H NMR titration spectra of [*n*-Bu<sub>4</sub>N][PF<sub>6</sub>] added to **2** in CDCl<sub>3</sub> at 20 °C.

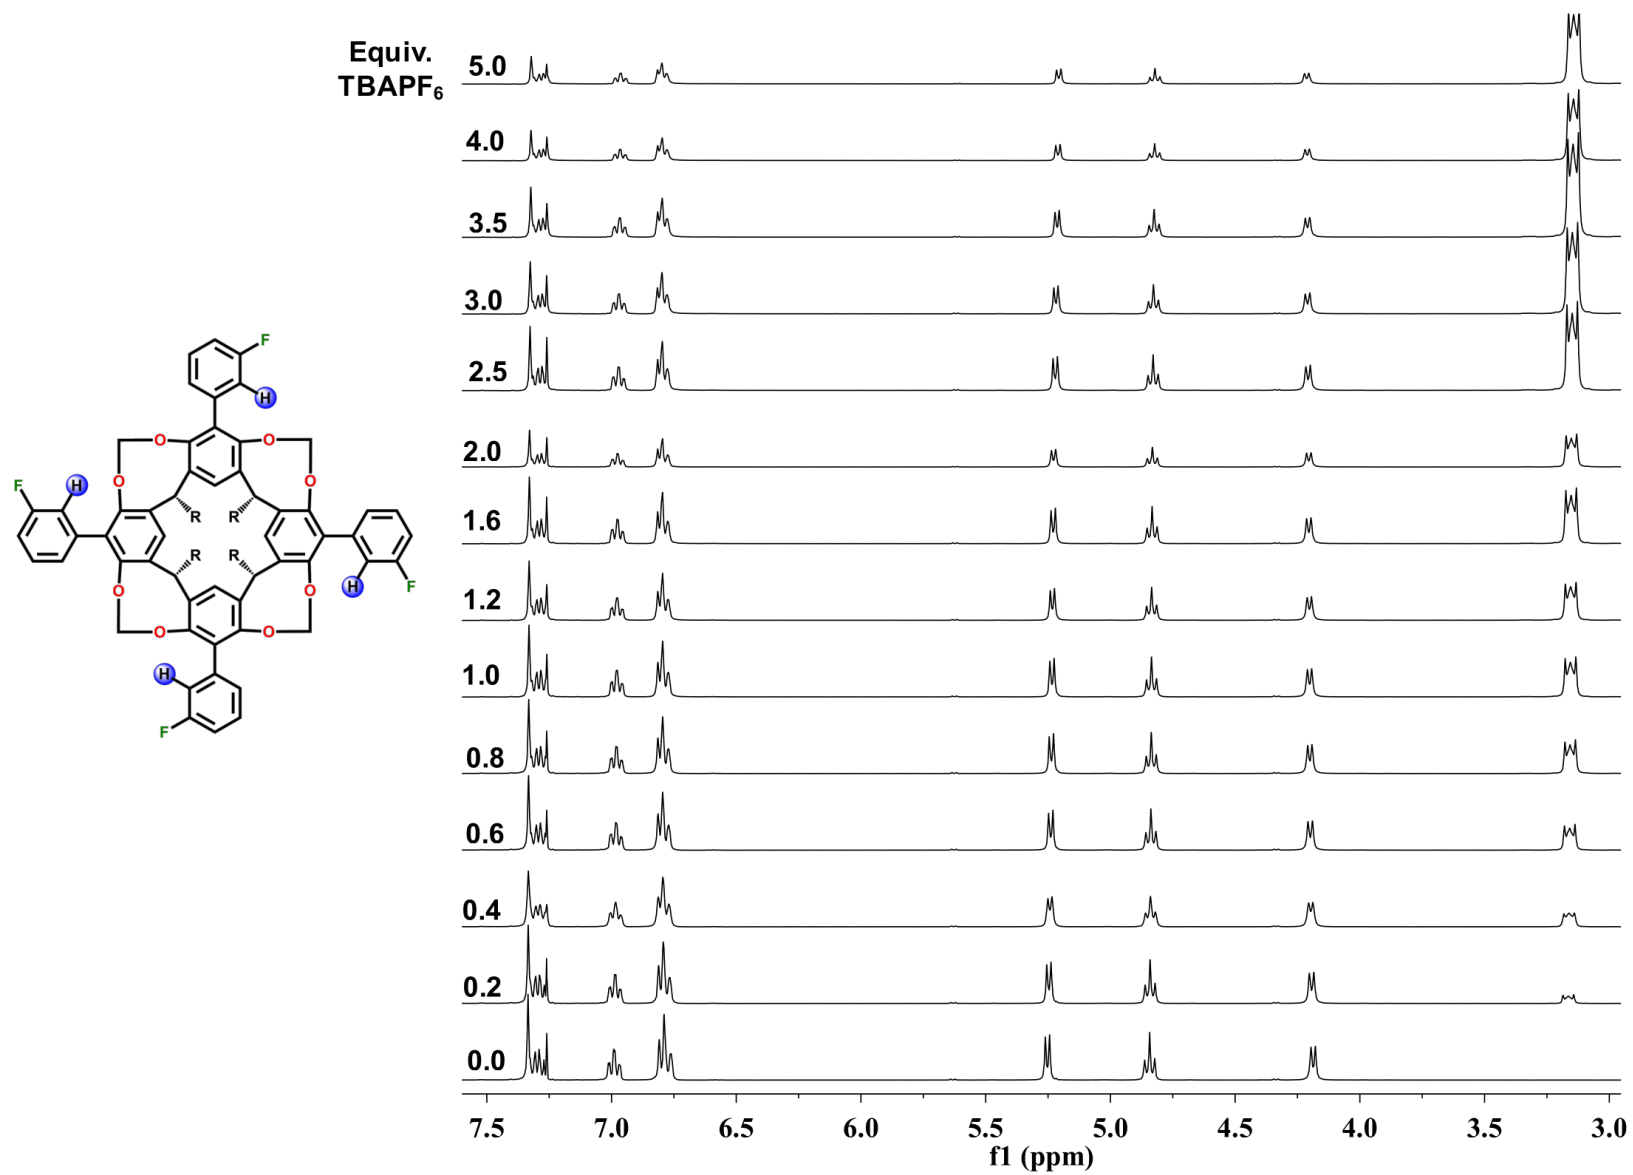

**Figure S39.**  $^1\text{H}$  NMR titration spectra of  $[n\text{-Bu}_4\text{N}][\text{PF}_6]$  added to **3** in  $\text{CDCl}_3$  at  $20^\circ\text{C}$ .

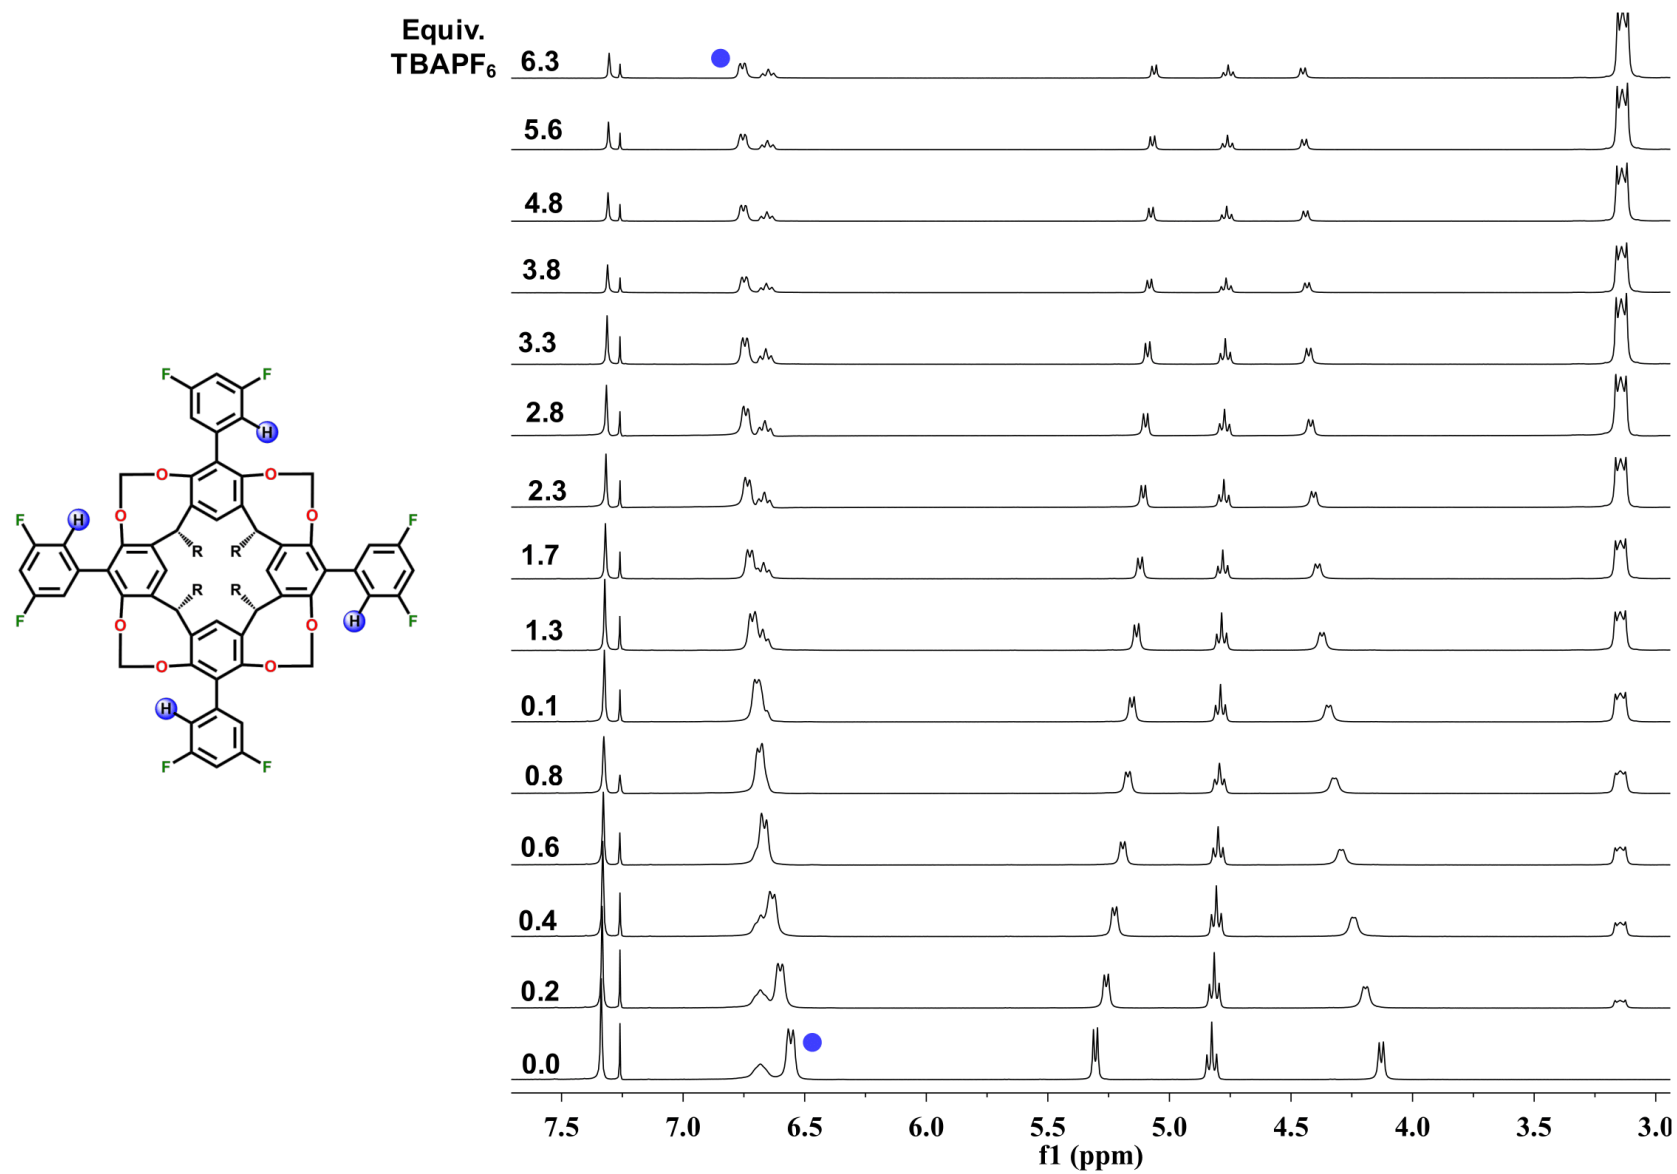

**Figure S40.** <sup>1</sup>H NMR titration spectra of [*n*-Bu<sub>4</sub>N][PF<sub>6</sub>] added to **4** in CDCl<sub>3</sub> at 20 °C.

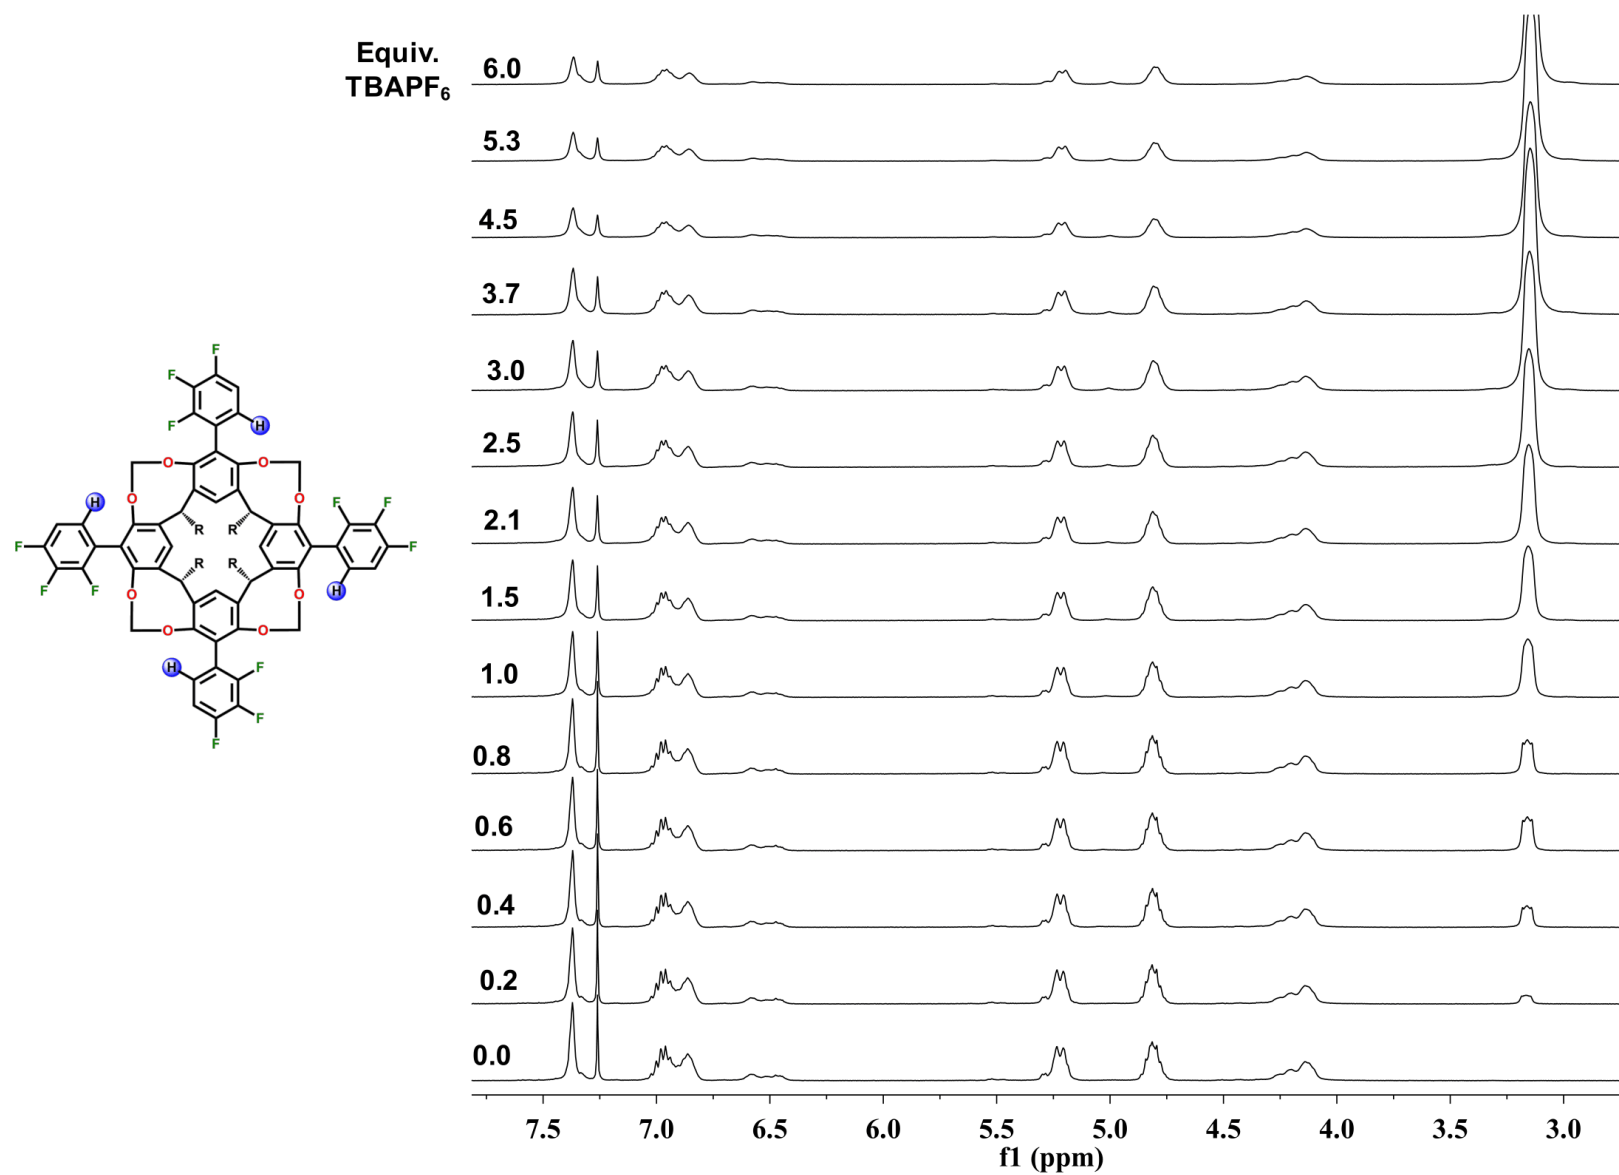

**Figure S41.** <sup>1</sup>H NMR titration spectra of [*n*-Bu<sub>4</sub>N][PF<sub>6</sub>] added to **5** in CDCl<sub>3</sub> at 20 °C.

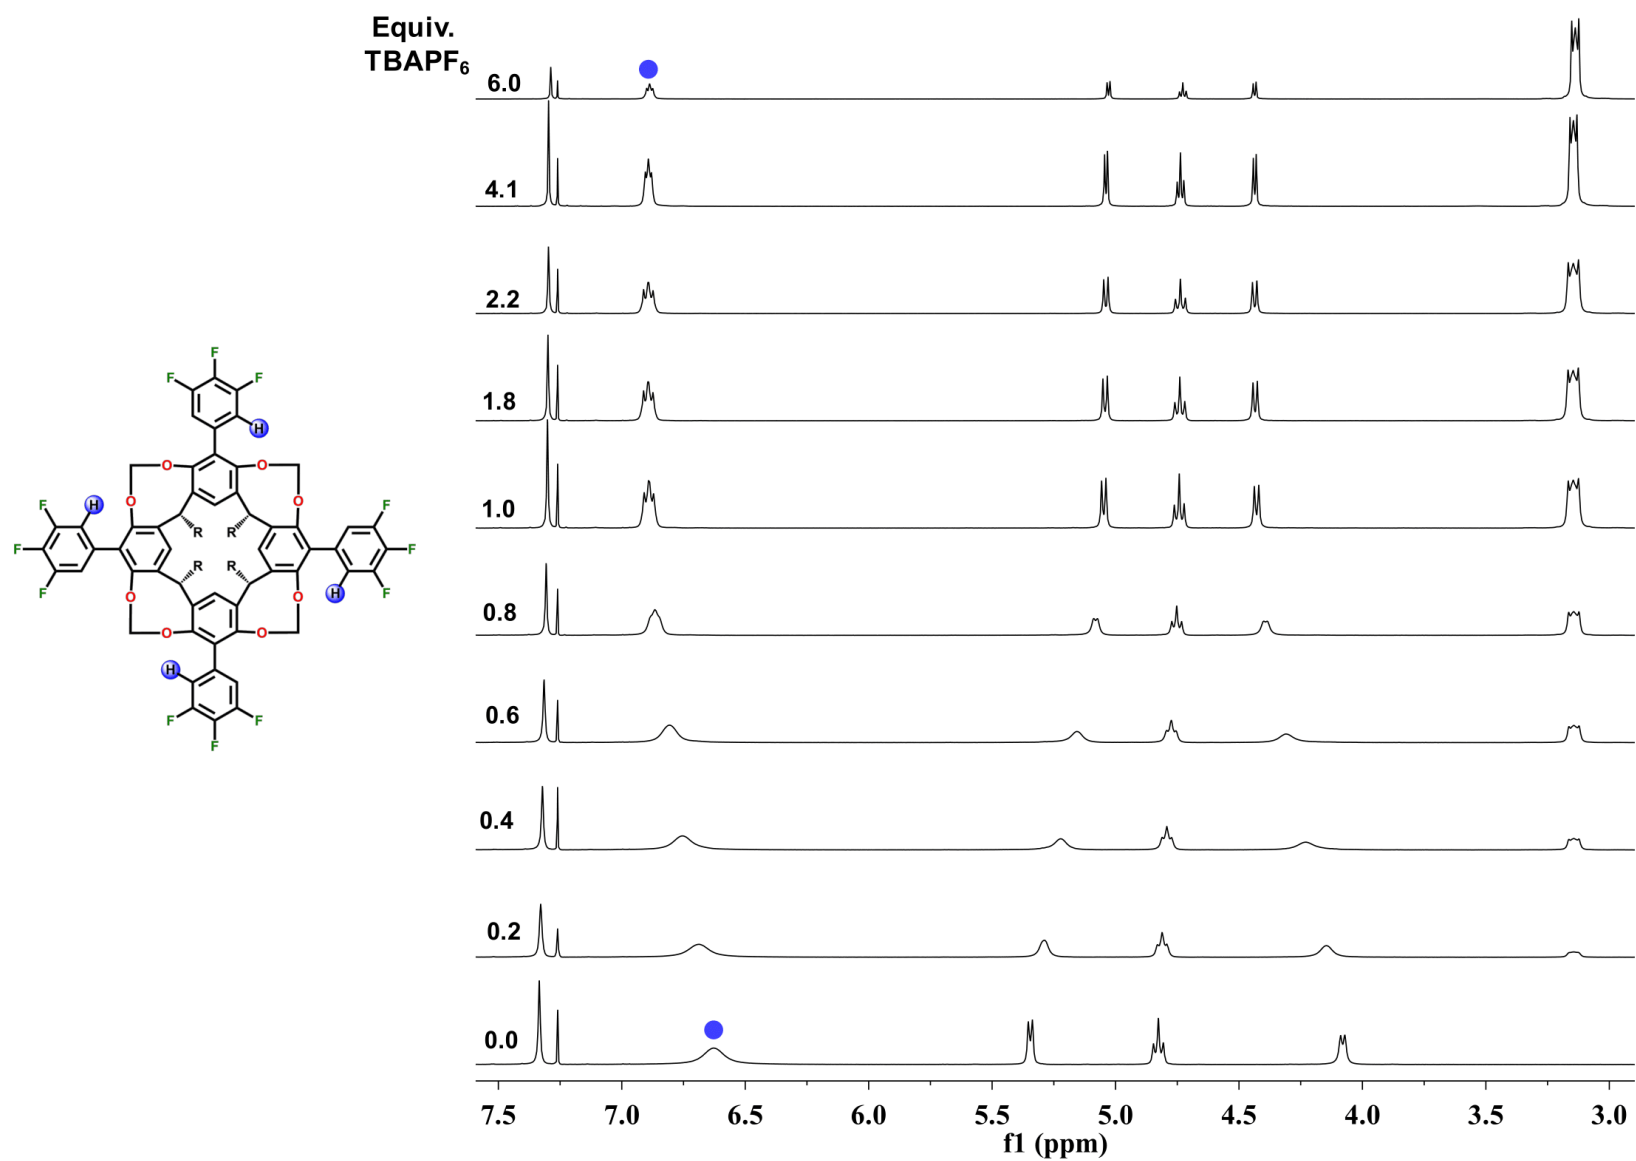

**Figure S42.** <sup>1</sup>H NMR titration spectra of [*n*-Bu<sub>4</sub>N][PF<sub>6</sub>] added to **6** in CDCl<sub>3</sub> at 20 °C.

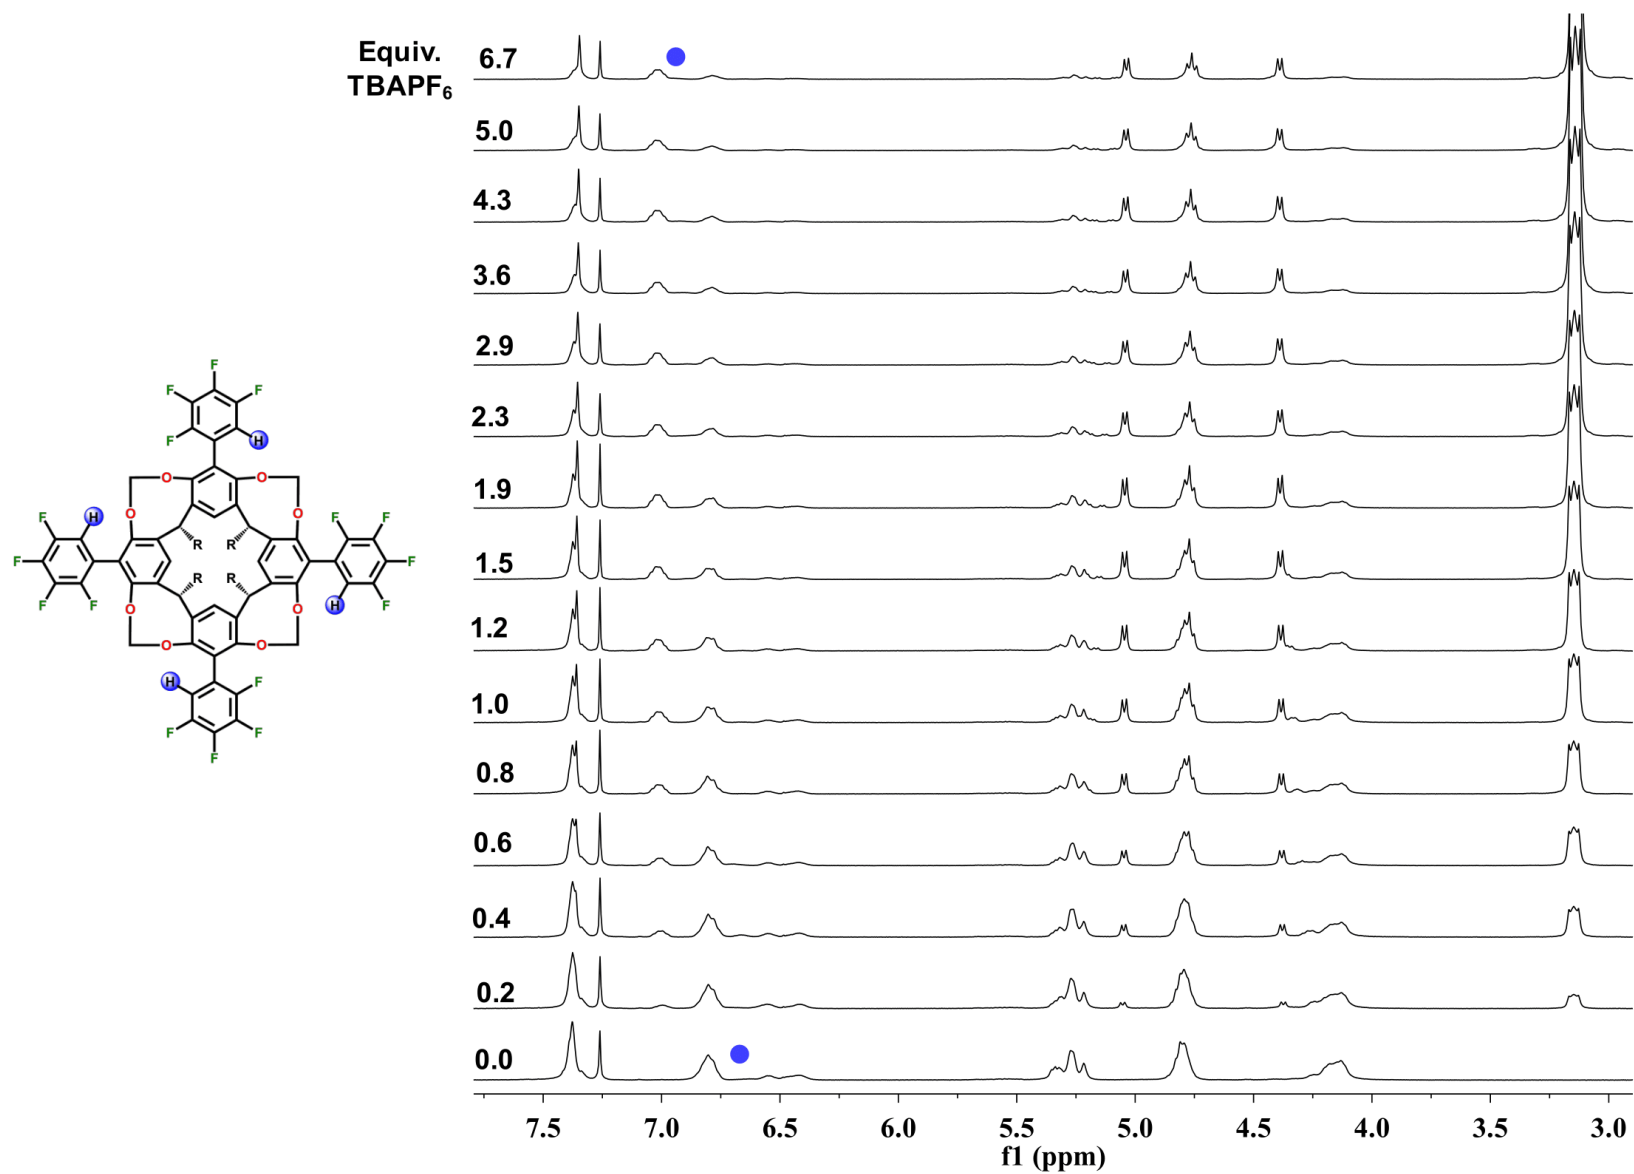

**Figure S43.** <sup>1</sup>H NMR titration spectra of [*n*-Bu<sub>4</sub>N][PF<sub>6</sub>] added to **7** in CDCl<sub>3</sub> at 20 °C.

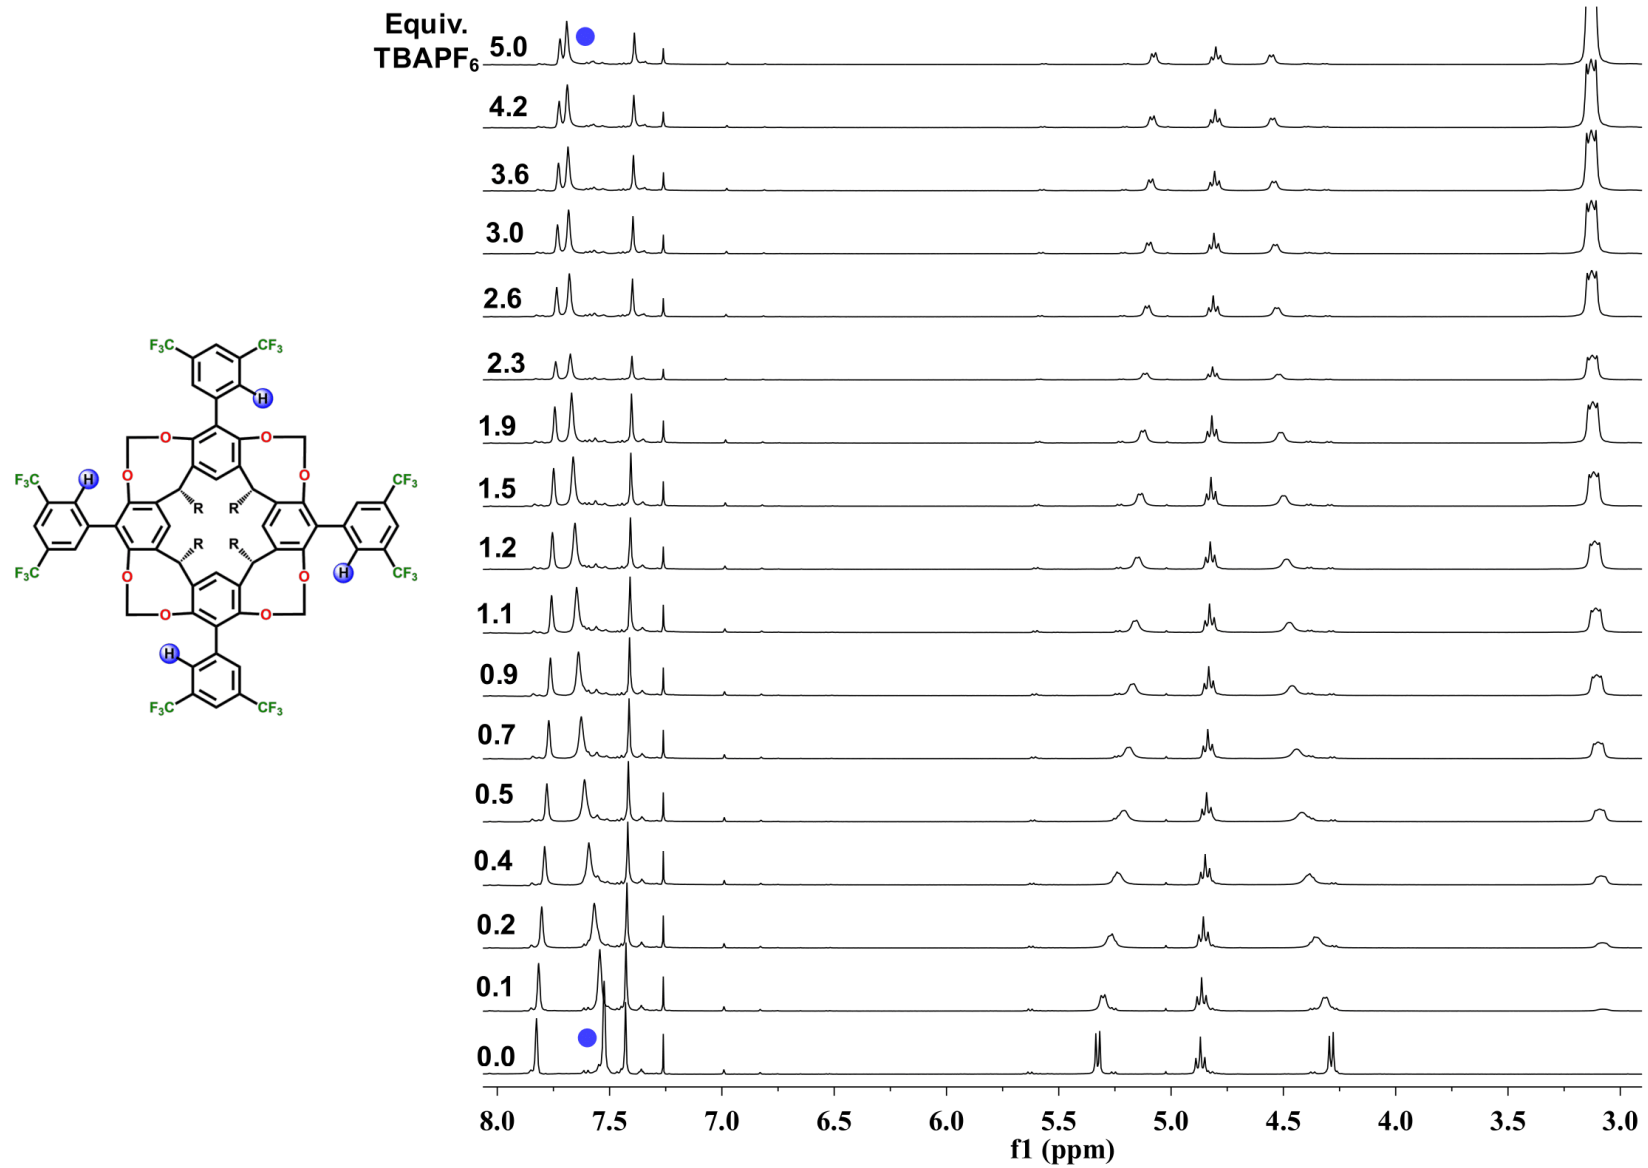

**Figure S44.** <sup>1</sup>H NMR titration spectra of [*n*-Bu<sub>4</sub>N][PF<sub>6</sub>] added to **8** in CDCl<sub>3</sub> at 20 °C.

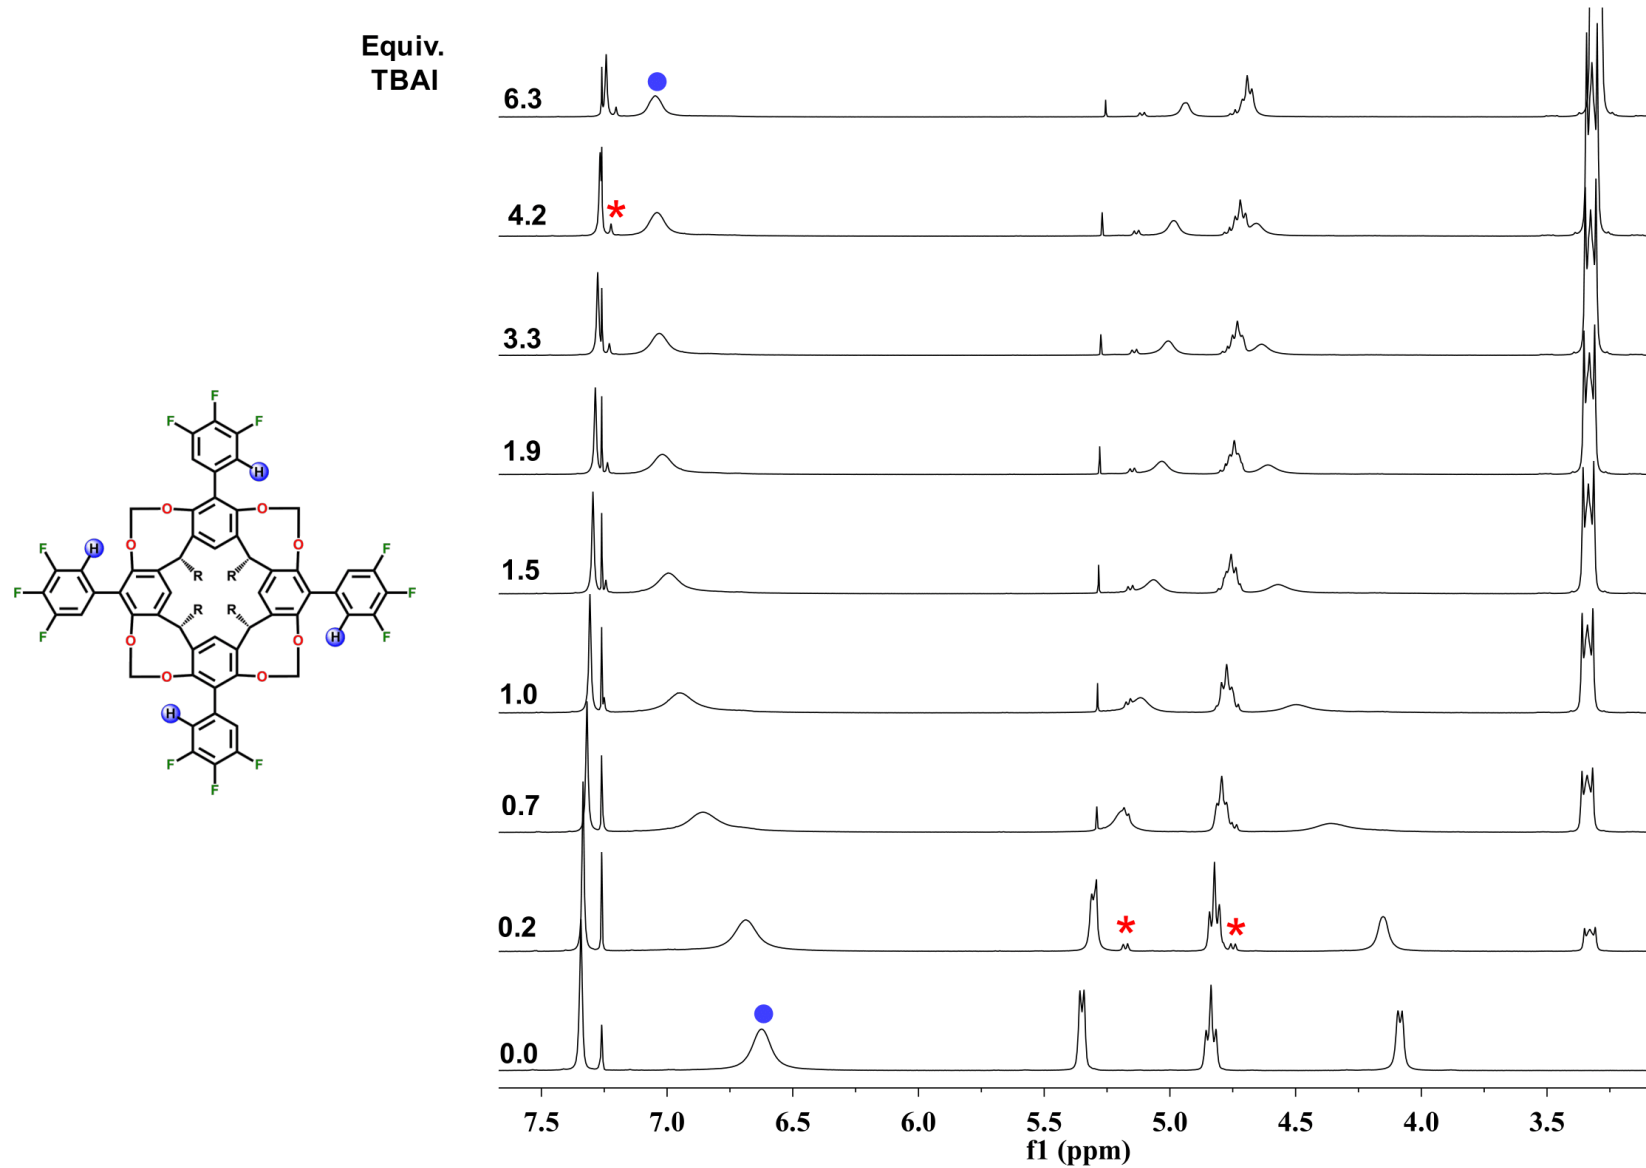

**Figure S45.** <sup>1</sup>H NMR titration spectra of [n-Bu<sub>4</sub>N][I] added to **6** in CDCl<sub>3</sub> at 20 °C (asterisk sign shows impurities from [n-Bu<sub>4</sub>N][I]).



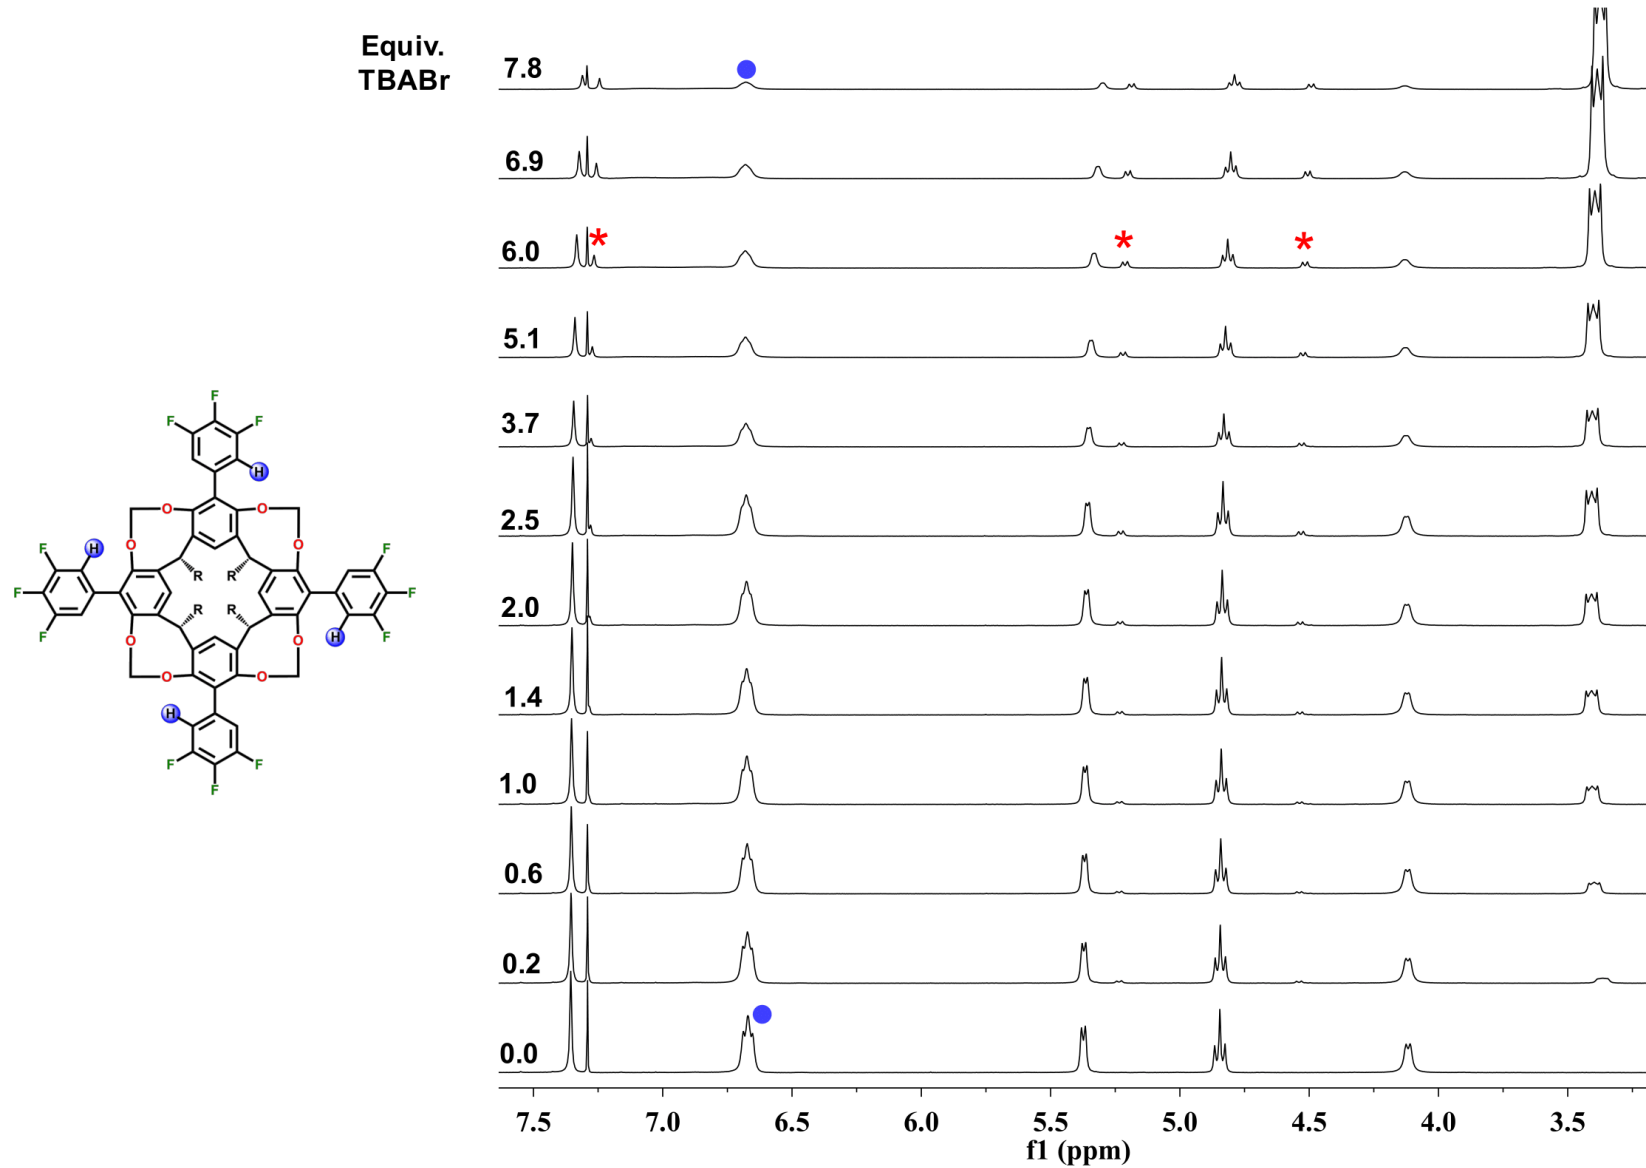

**Figure S46.** <sup>1</sup>H NMR titration spectra of [*n*-Bu<sub>4</sub>N][Br] added to **6** in CDCl<sub>3</sub> at 20 °C (asterisk sign shows impurities from [*n*-Bu<sub>4</sub>N][Br]).

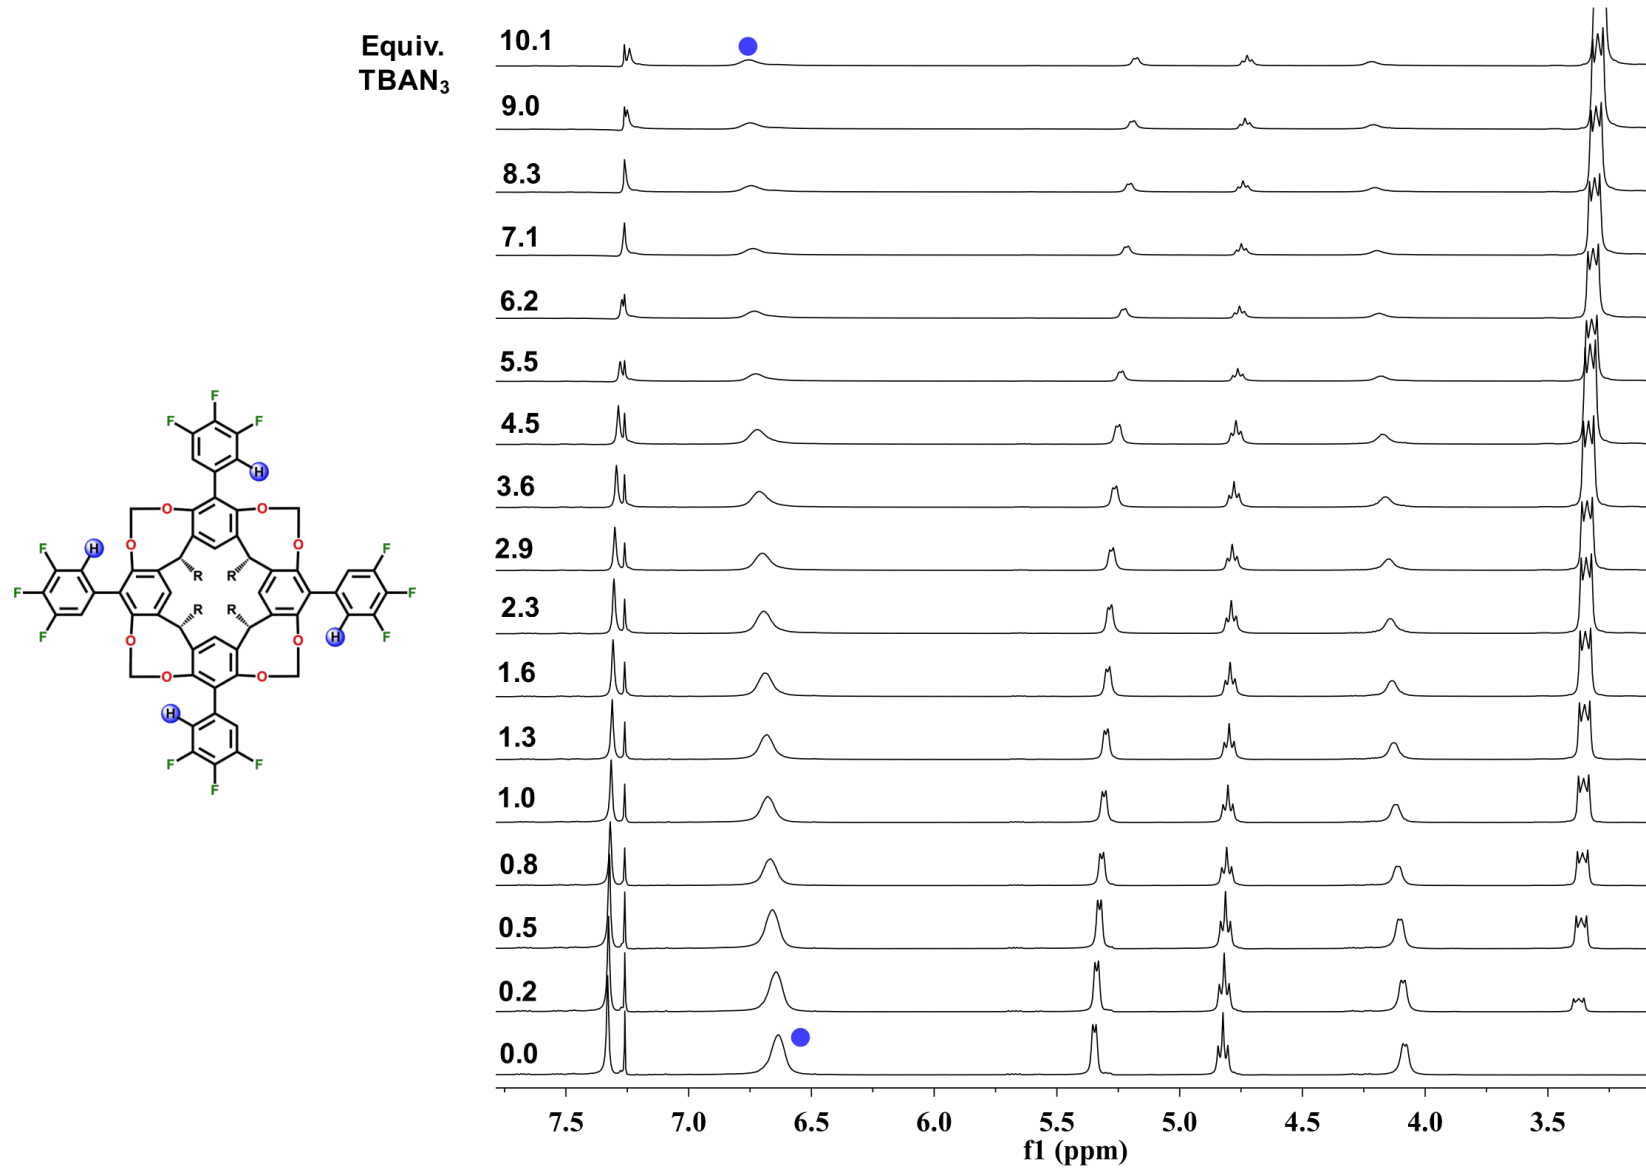

**Figure S47.**  $^1\text{H}$  NMR titration spectra of  $[n\text{-Bu}_4\text{N}][\text{N}_3]$  added to **6** in  $\text{CDCl}_3$  at 20 °C.

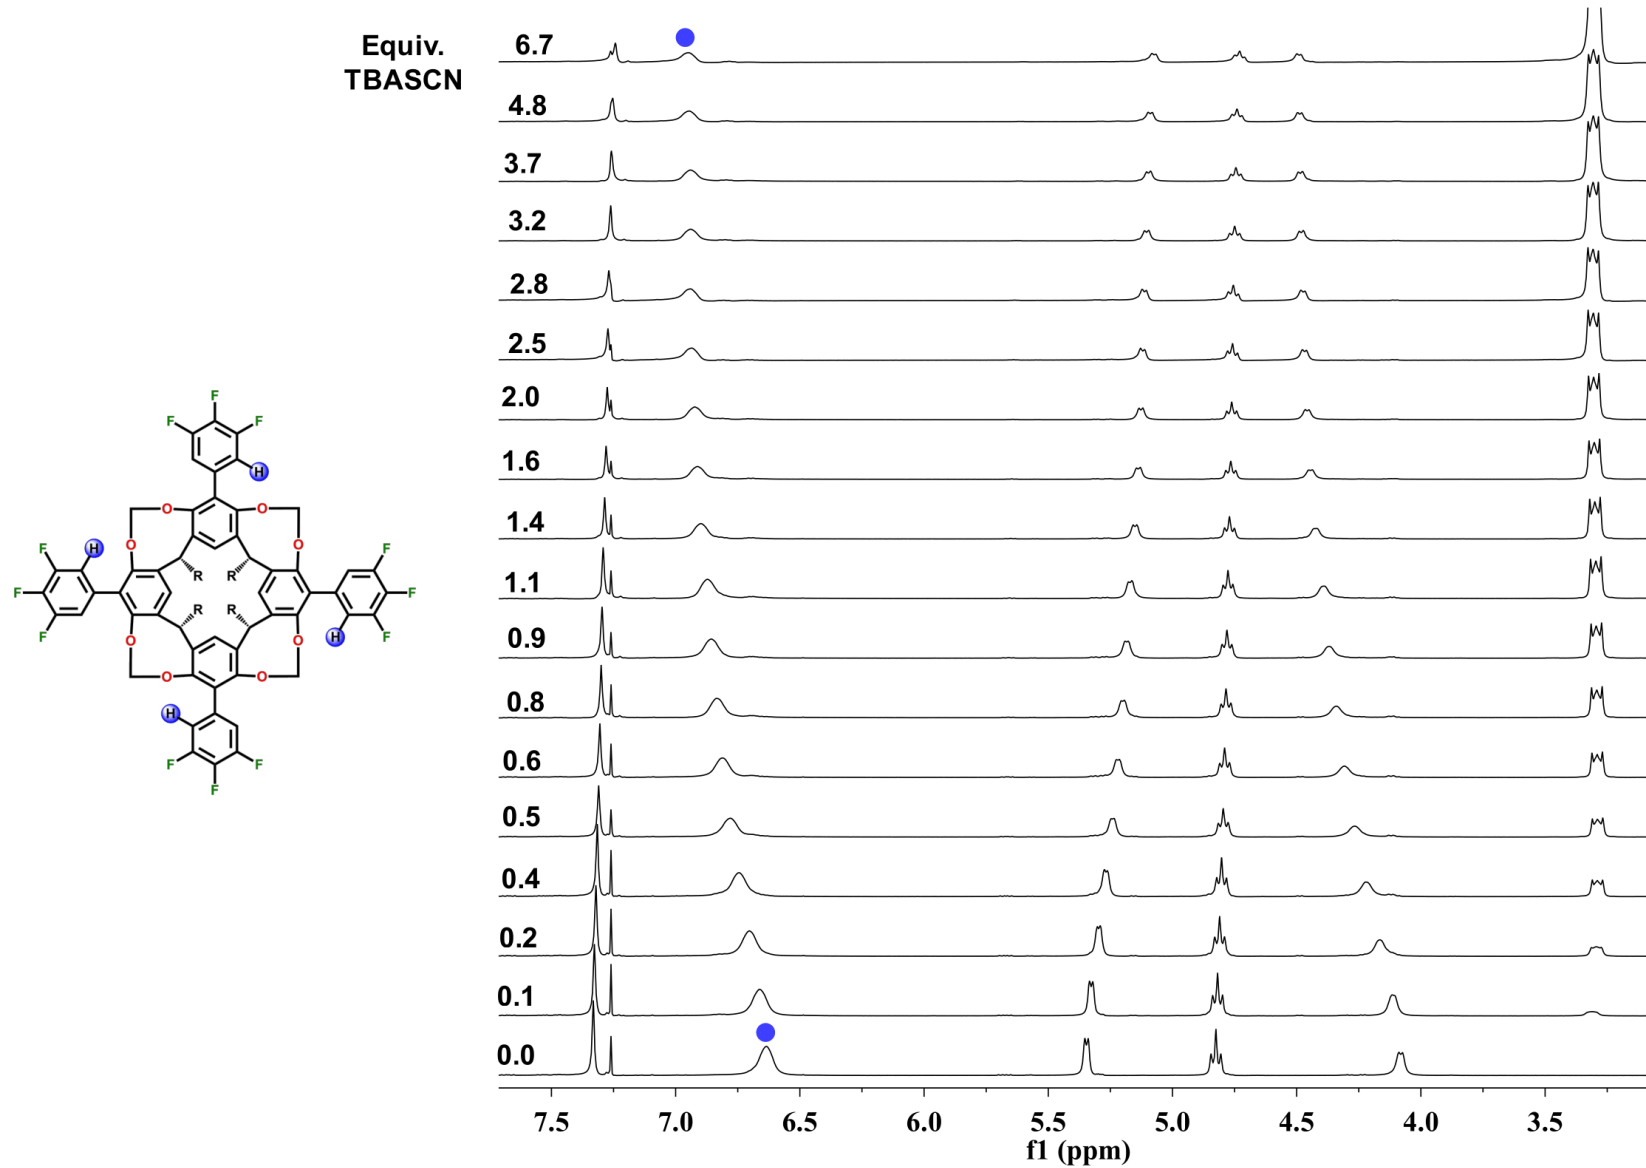

**Figure S48.**  $^1\text{H}$  NMR titration spectra of  $[n\text{-Bu}_4\text{N}][\text{SCN}]$  added to **6** in  $\text{CDCl}_3$  at  $20^\circ\text{C}$ .

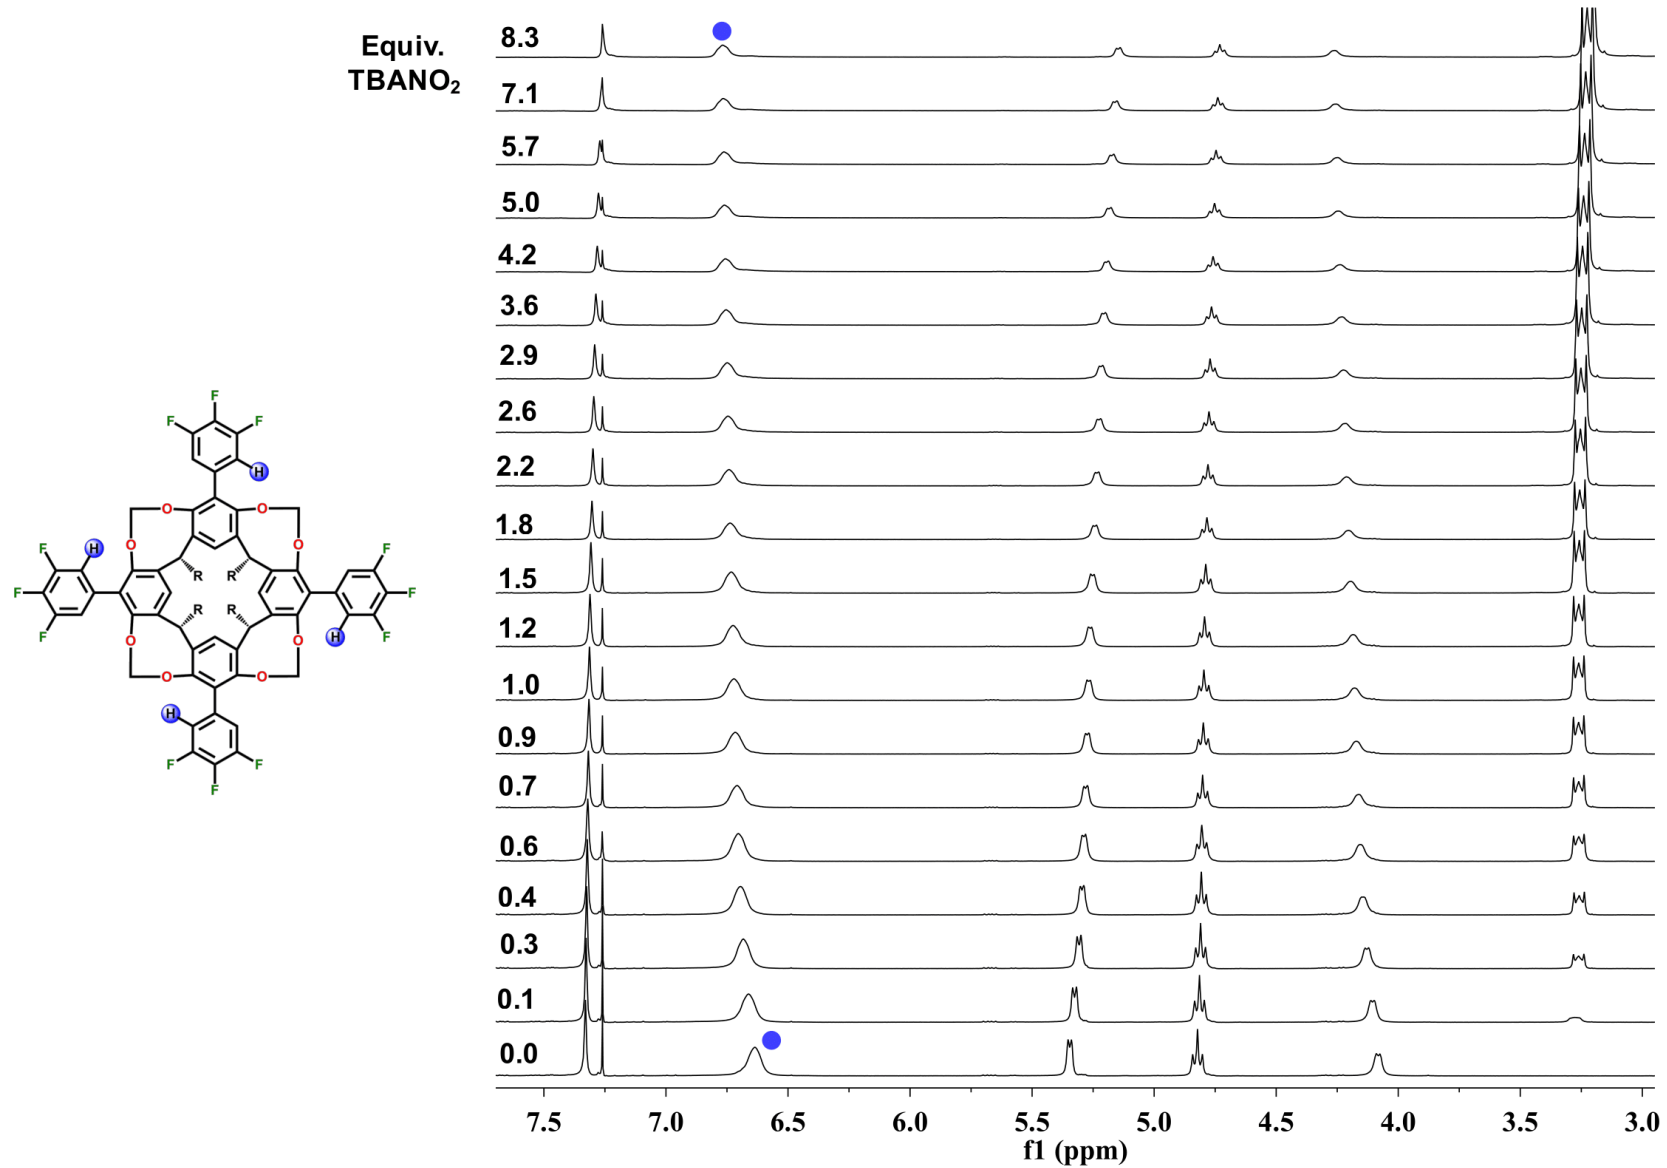

**Figure S49.**  $^1\text{H}$  NMR titration spectra of  $[n\text{-Bu}_4\text{N}][\text{NO}_2]$  added to **6** in  $\text{CDCl}_3$  at  $20^\circ\text{C}$ .

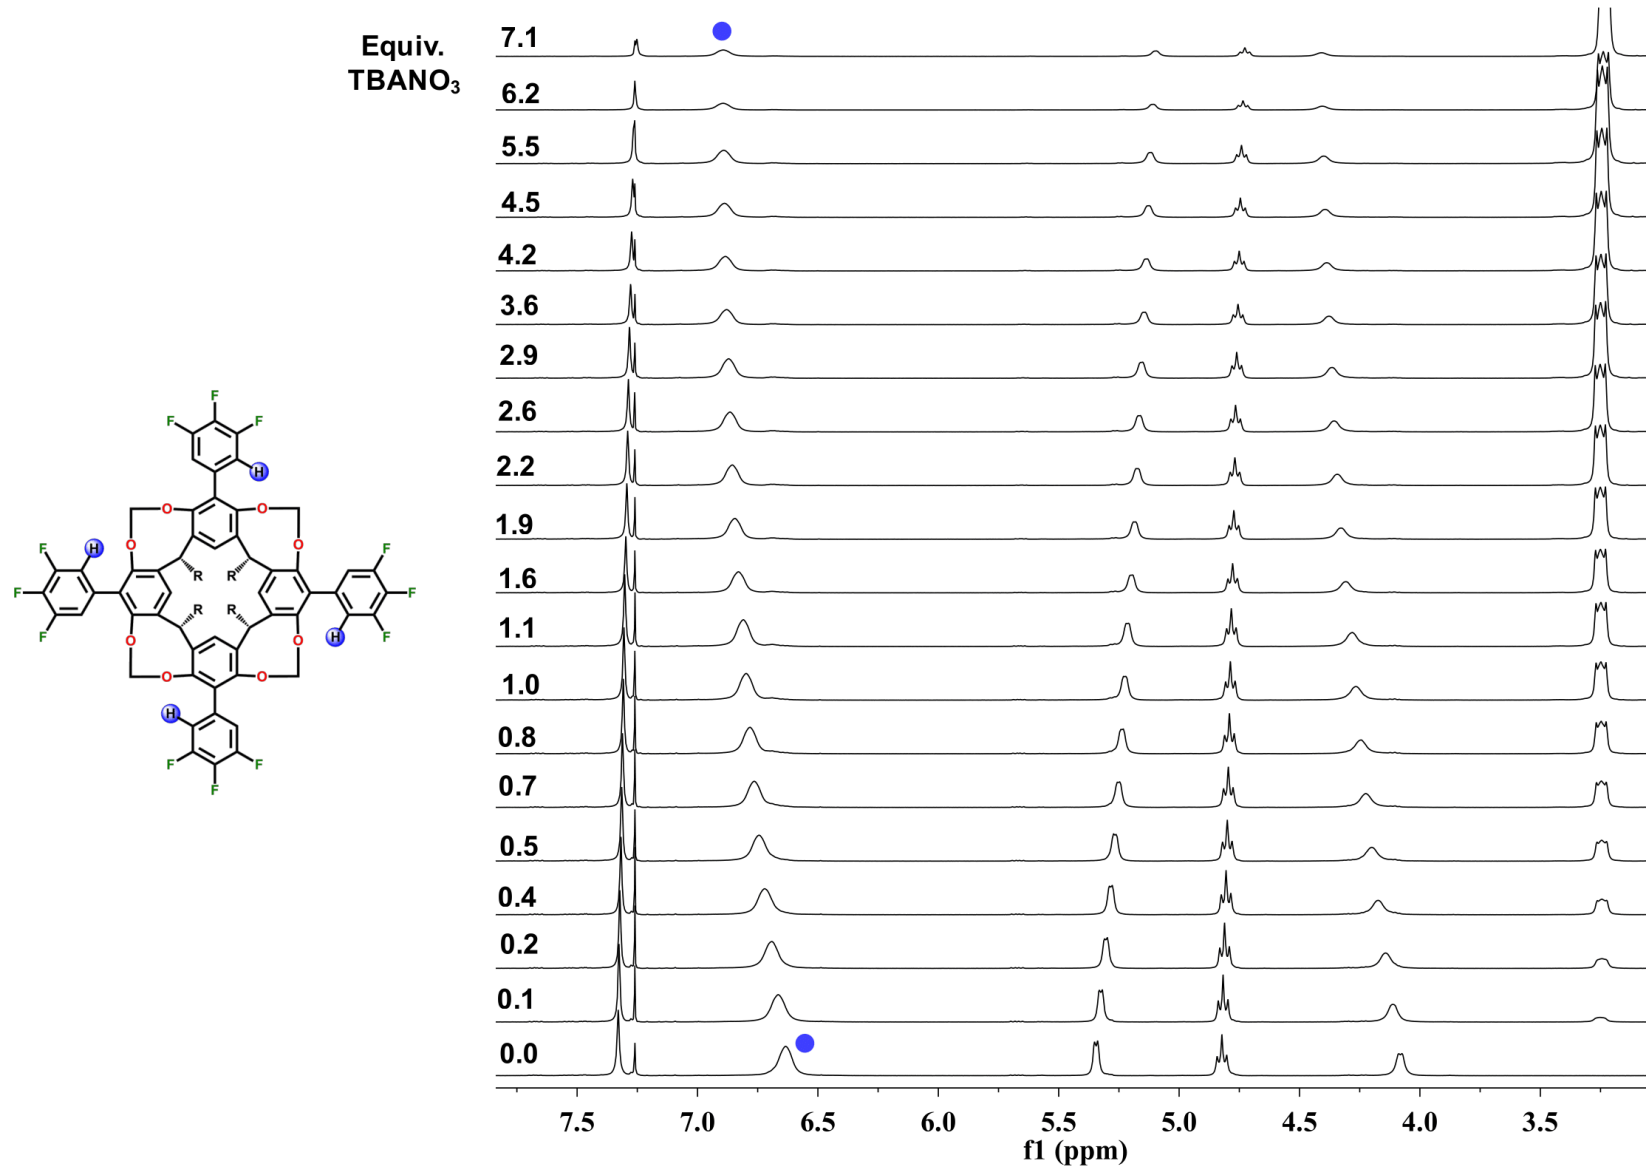

**Figure S50.** <sup>1</sup>H NMR titration spectra of [*n*-Bu<sub>4</sub>N][NO<sub>3</sub>] added to **6** in CDCl<sub>3</sub> at 20 °C.

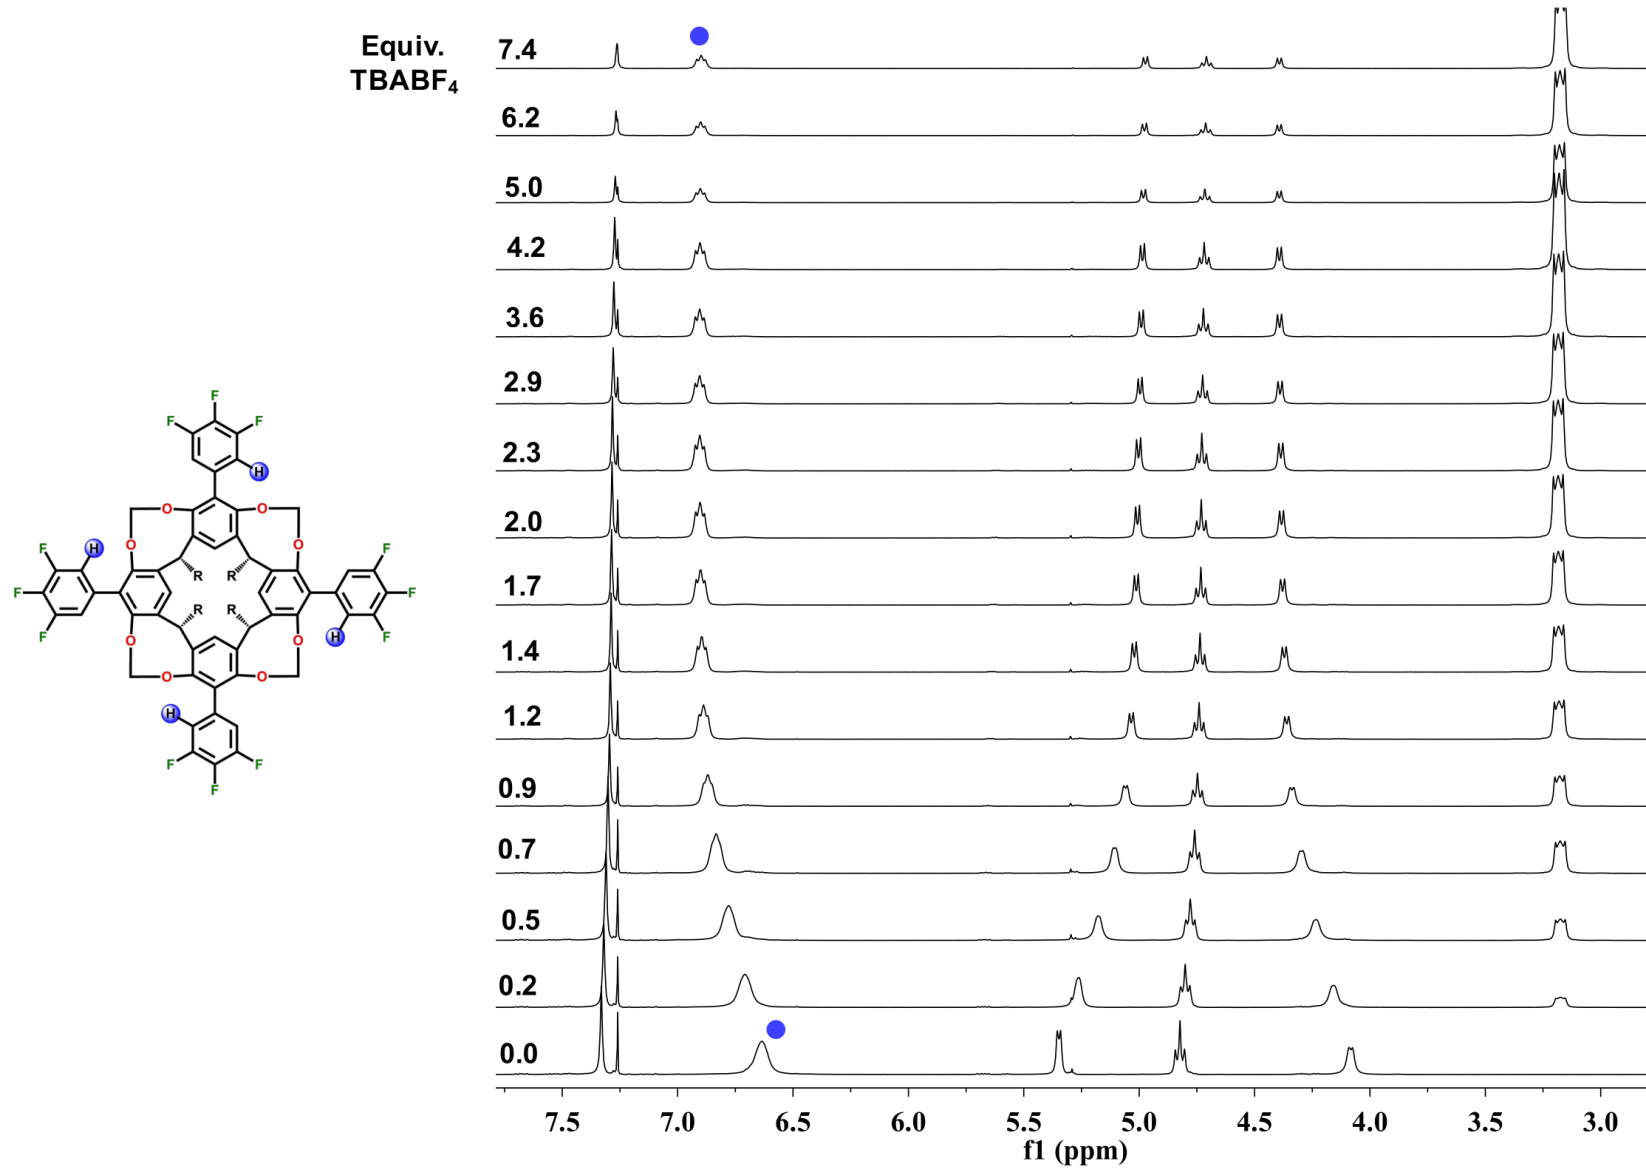

**Figure S51.** <sup>1</sup>H NMR titration spectra of [*n*-Bu<sub>4</sub>N][BF<sub>4</sub>] added to **6** in CDCl<sub>3</sub> at 20 °C.

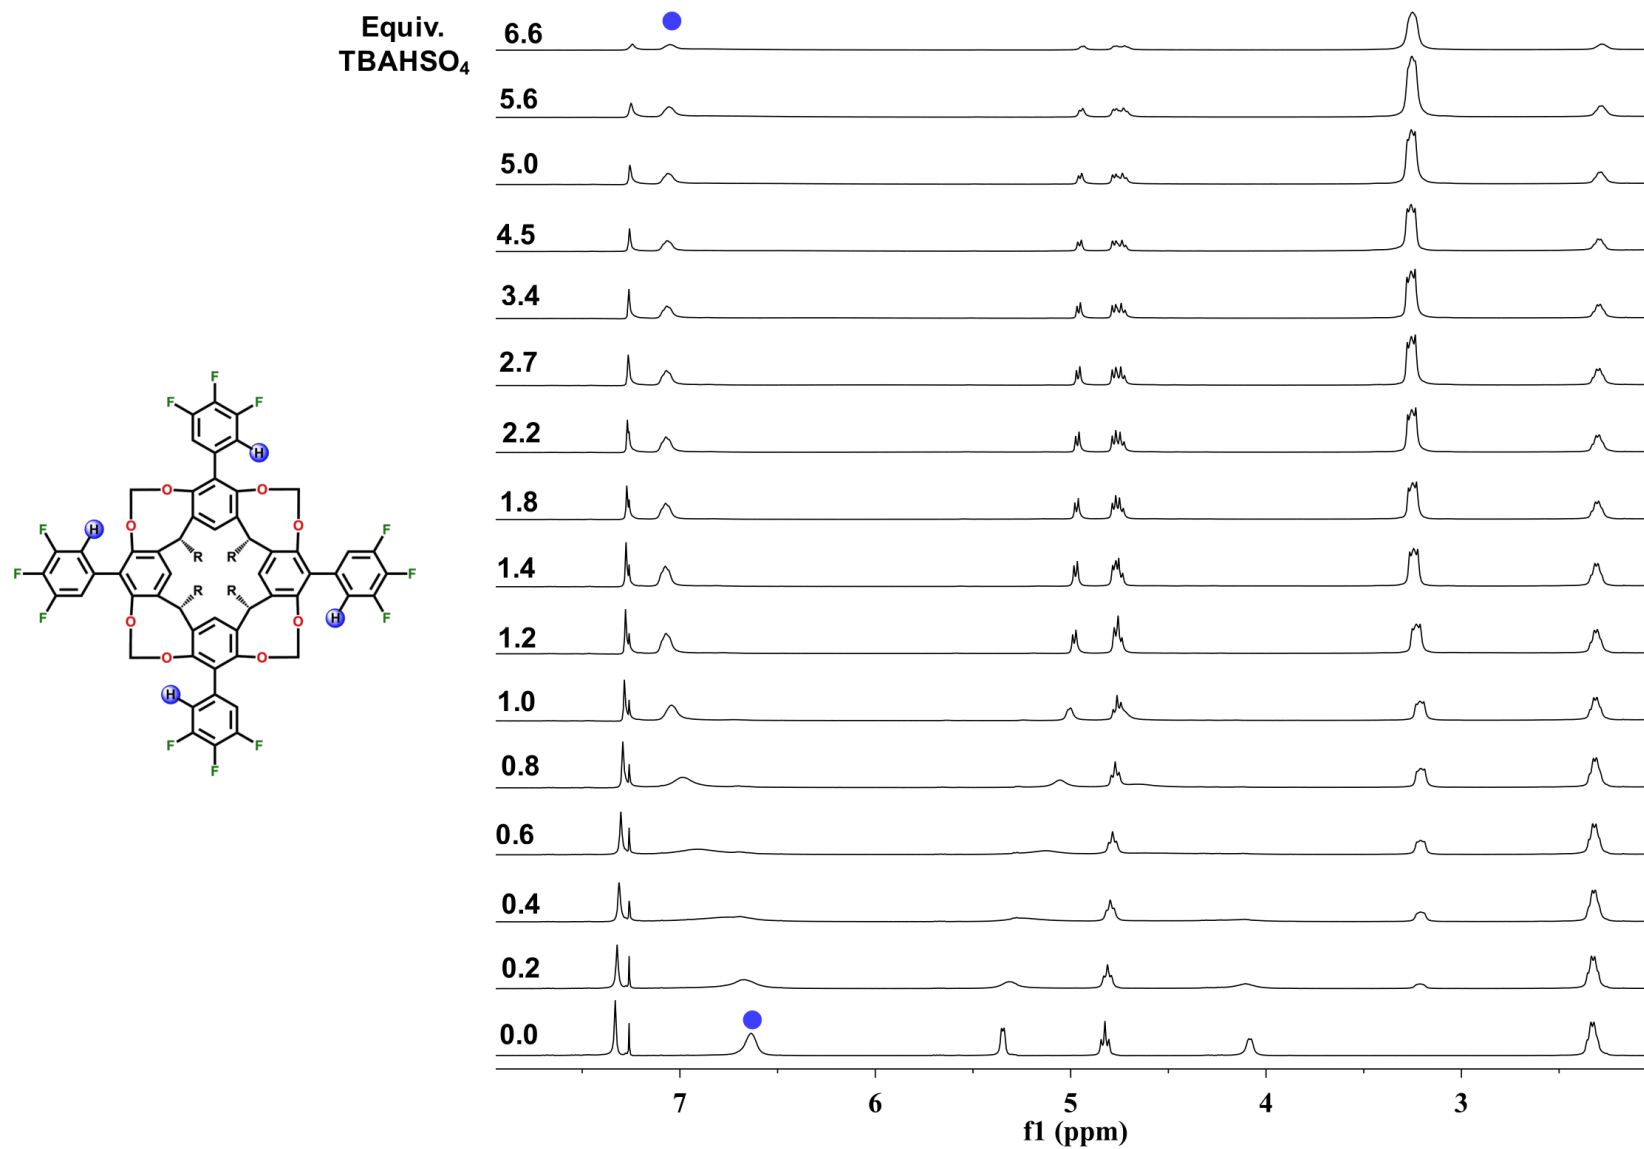

**Figure S52.** <sup>1</sup>H NMR titration spectra of [*n*-Bu<sub>4</sub>N][HSO<sub>4</sub>] added to **6** in CDCl<sub>3</sub> at 20 °C. Poor data fitting due to broadness,  $4 \times 10^4 < K_a < 1 \times 10^5 \text{ M}^{-1}$ .

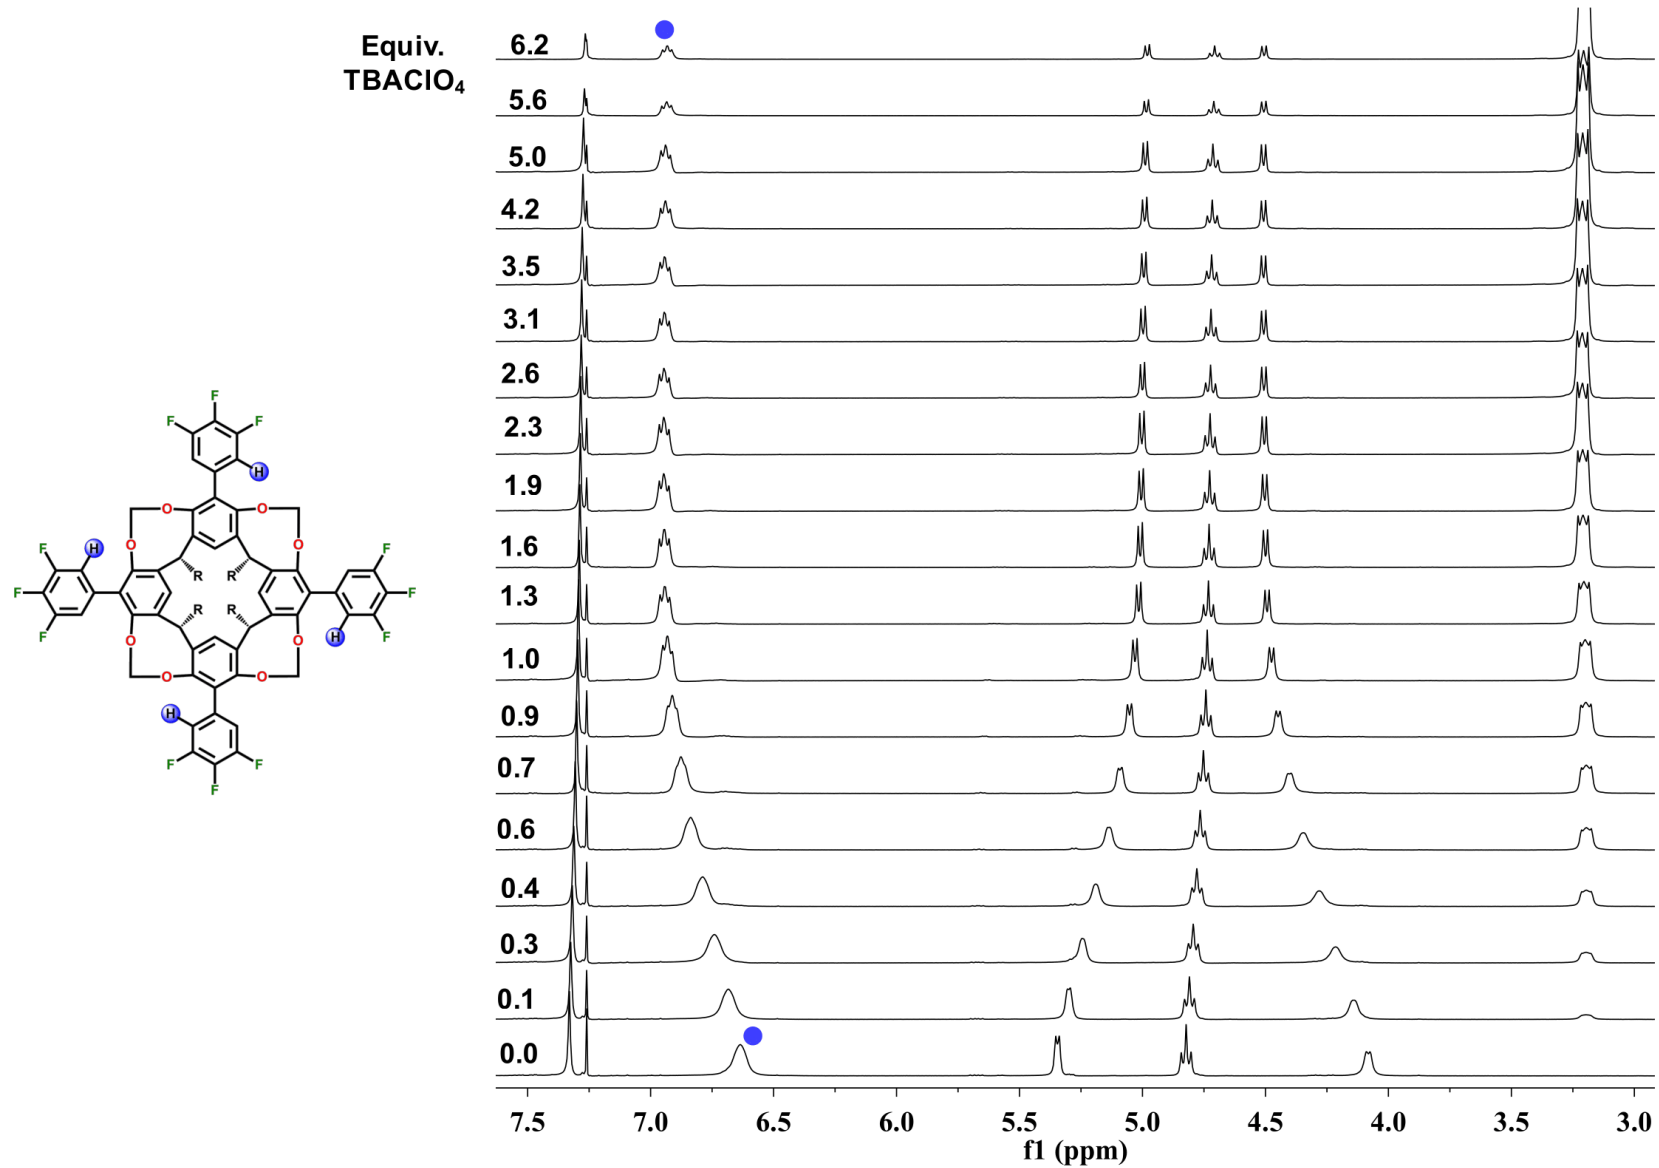

**Figure S53.** <sup>1</sup>H NMR titration spectra of [*n*-Bu<sub>4</sub>N][ClO<sub>4</sub>] added to **6** in CDCl<sub>3</sub> at 20 °C.



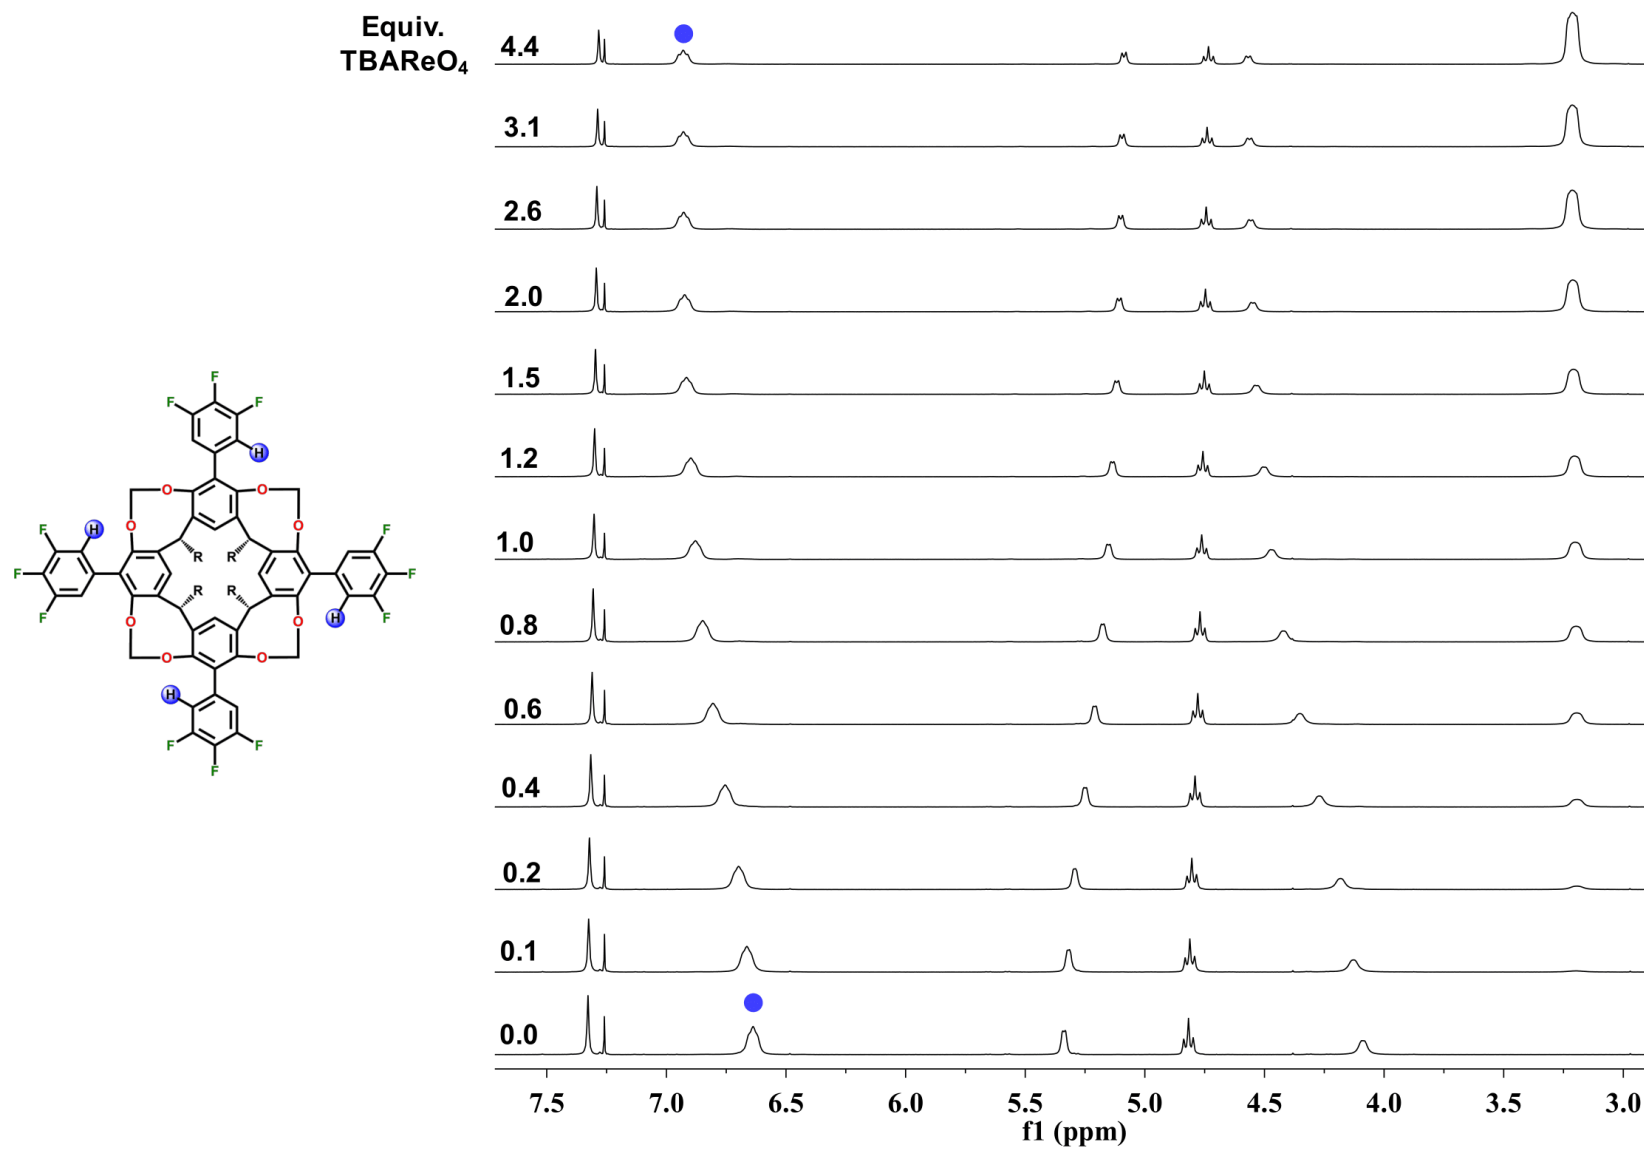

**Figure S54.**  $^1\text{H}$  NMR titration spectra of  $[\textit{n}\text{-Bu}_4\text{N}][\text{ReO}_4]$  added to **6** in  $\text{CDCl}_3$  at  $20^\circ\text{C}$ .

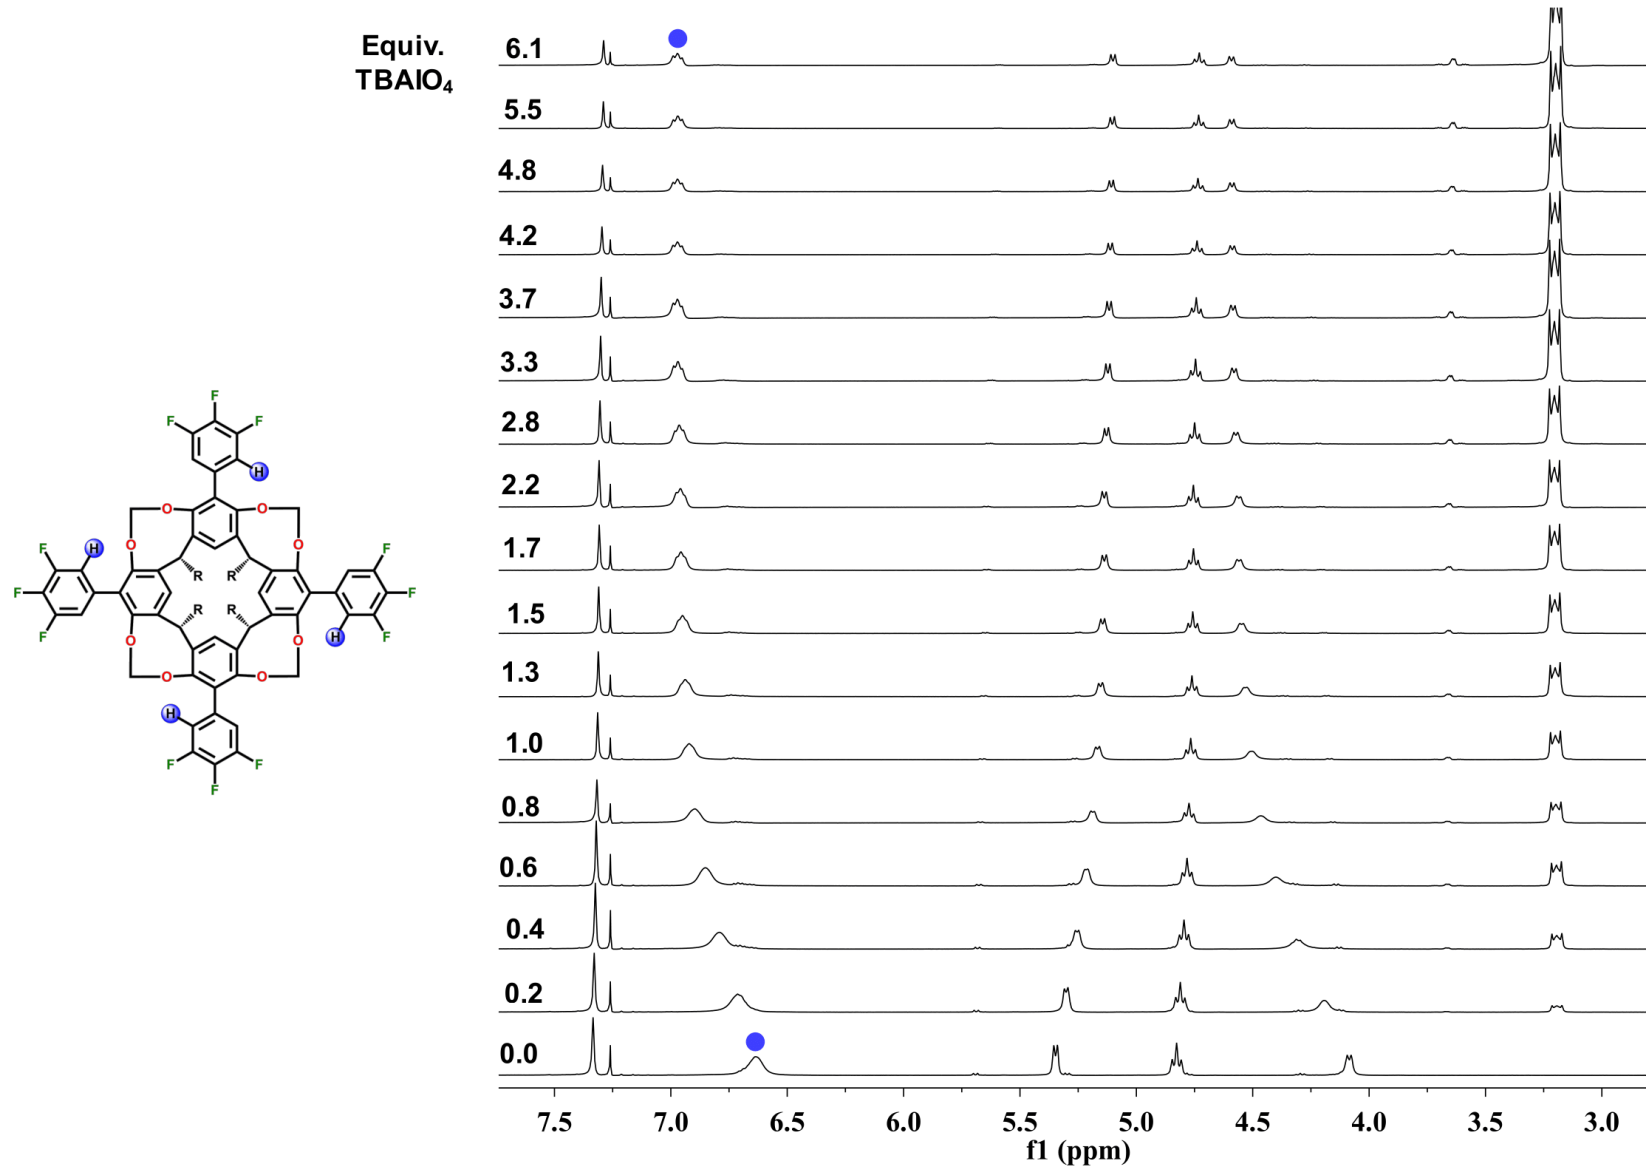

**Figure S55.**  $^1\text{H}$  NMR titration spectra of  $[\textit{n}\text{-Bu}_4\text{N}][\text{IO}_4]$  added to **6** in  $\text{CDCl}_3$  at  $20^\circ\text{C}$ .

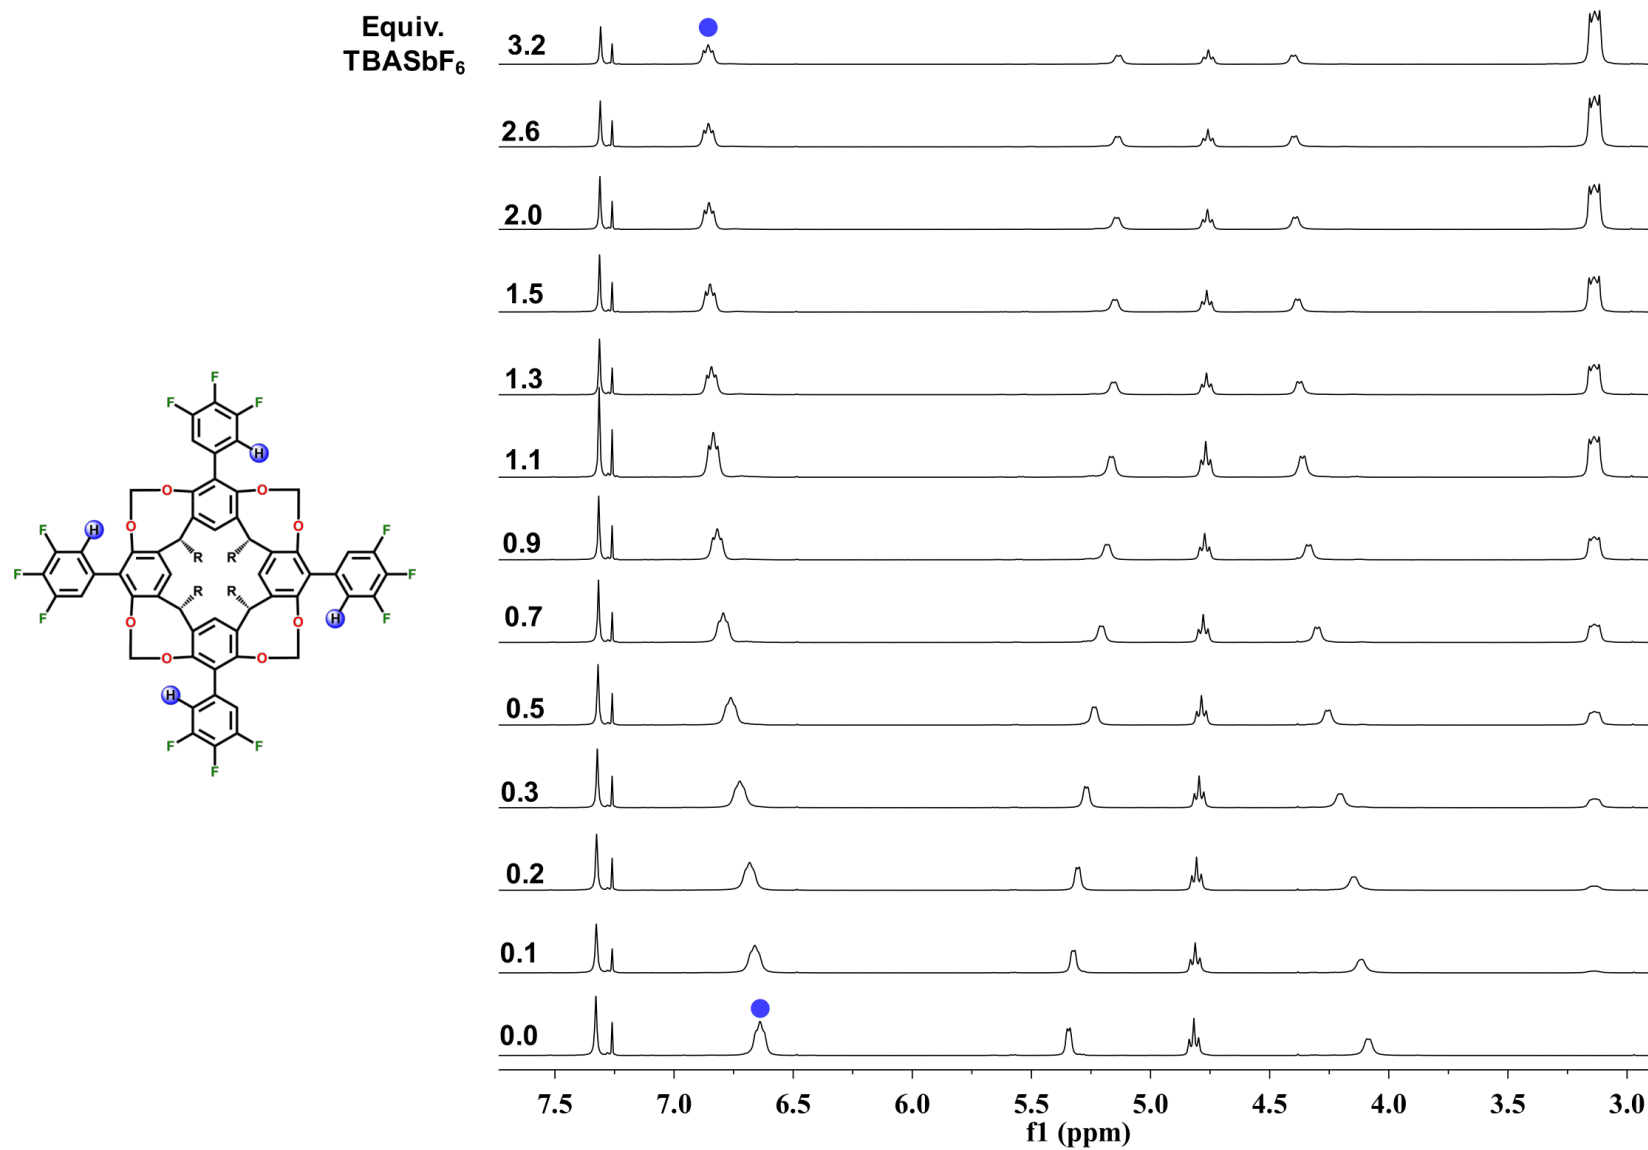

**Figure S56.** <sup>1</sup>H NMR titration spectra of [*n*-Bu<sub>4</sub>N][SbF<sub>6</sub>] added to **6** in CDCl<sub>3</sub> at 20 °C.

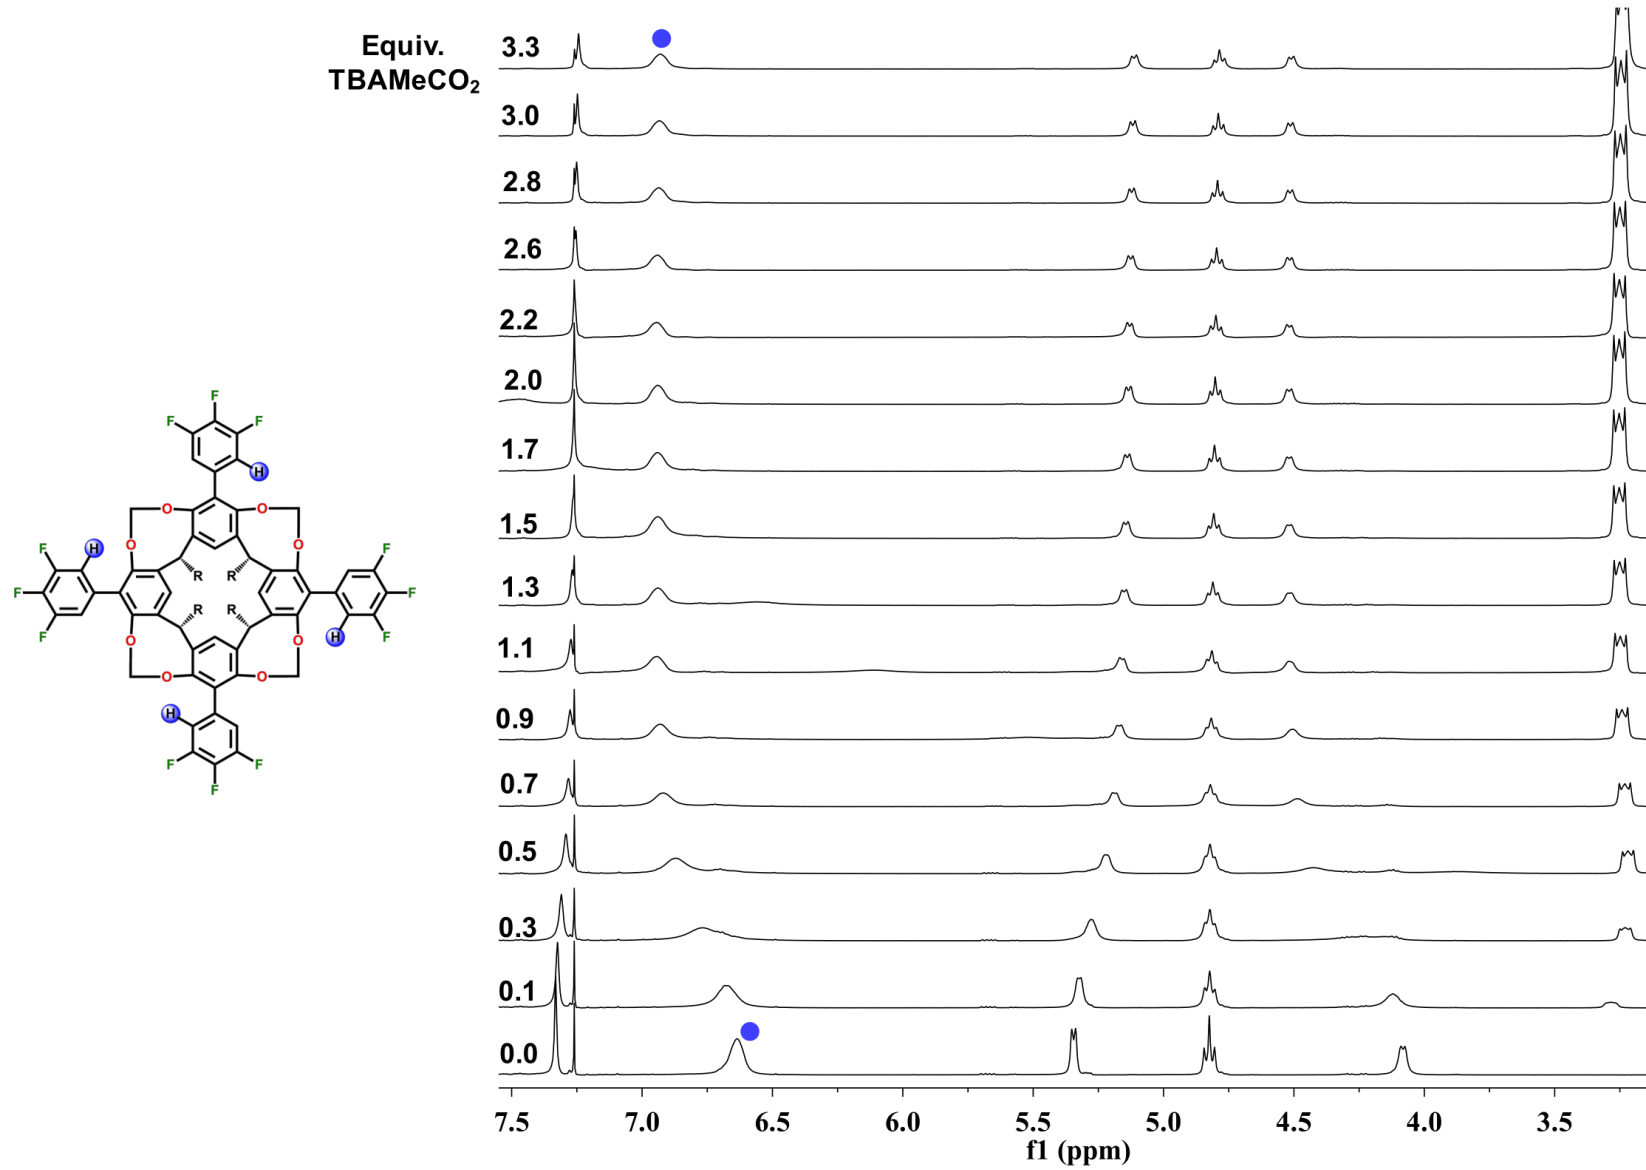

**Figure S57.** <sup>1</sup>H NMR titration spectra of [*n*-Bu<sub>4</sub>N][MeCO<sub>2</sub>] added to **6** in CDCl<sub>3</sub> at 20 °C.

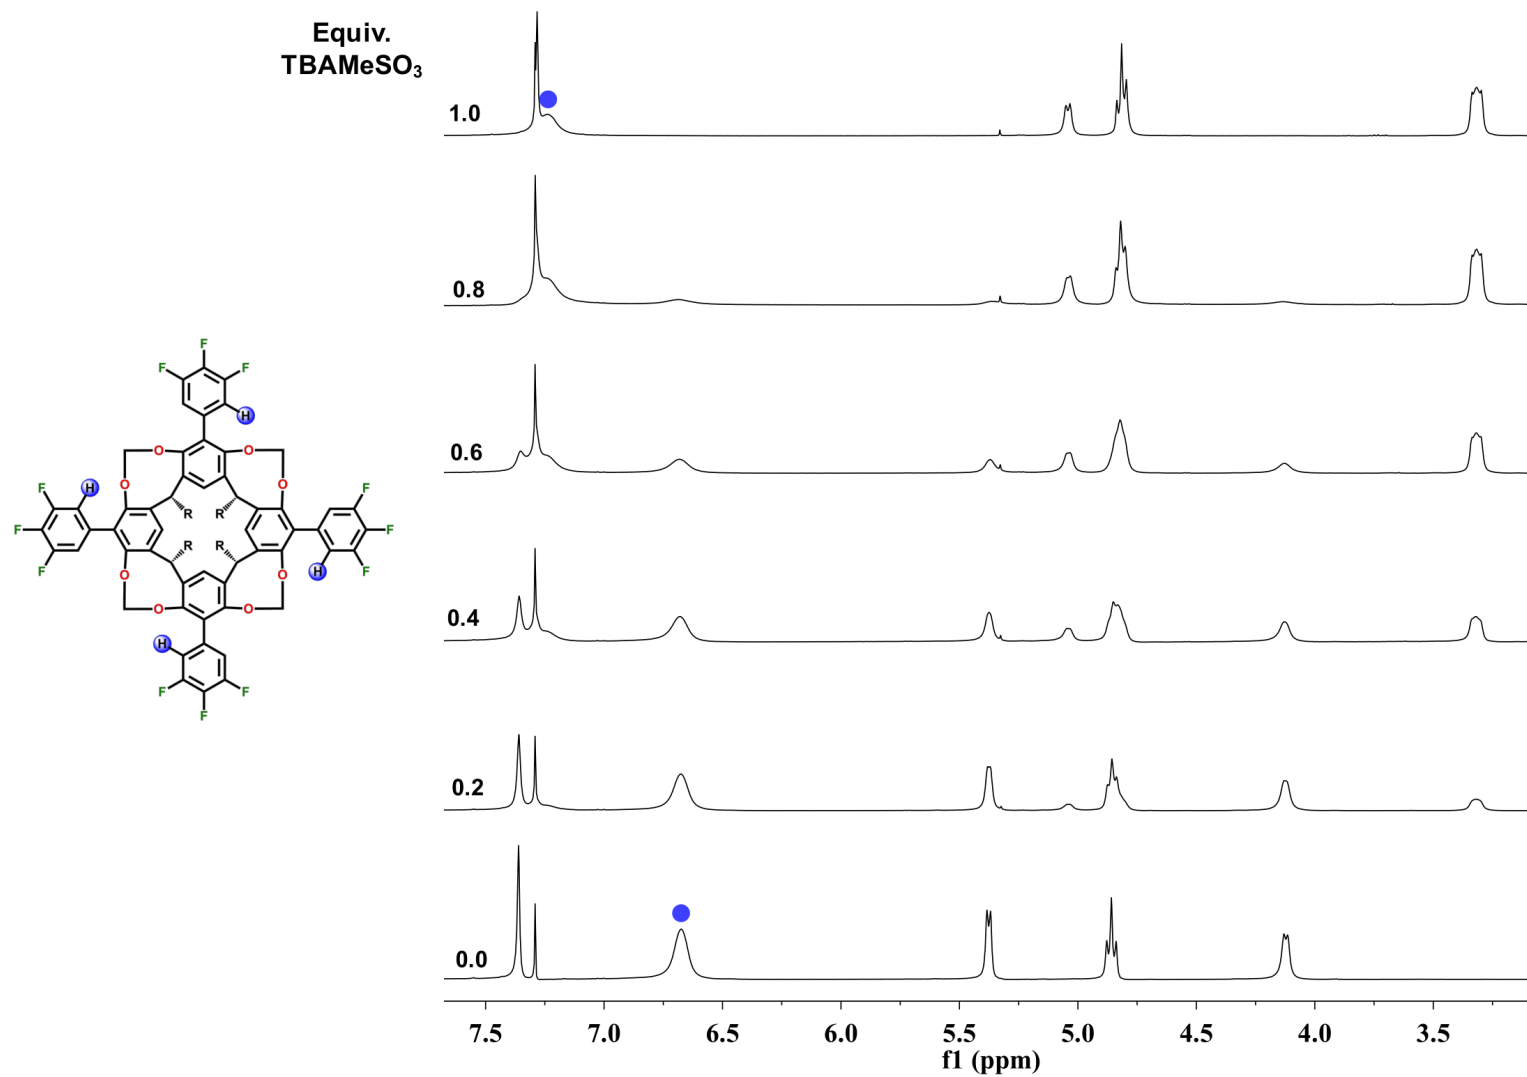

**Figure S58.** <sup>1</sup>H NMR titration spectra of [*n*-Bu<sub>4</sub>N][MeSO<sub>3</sub>] added to **6** in CDCl<sub>3</sub> at 20 °C.

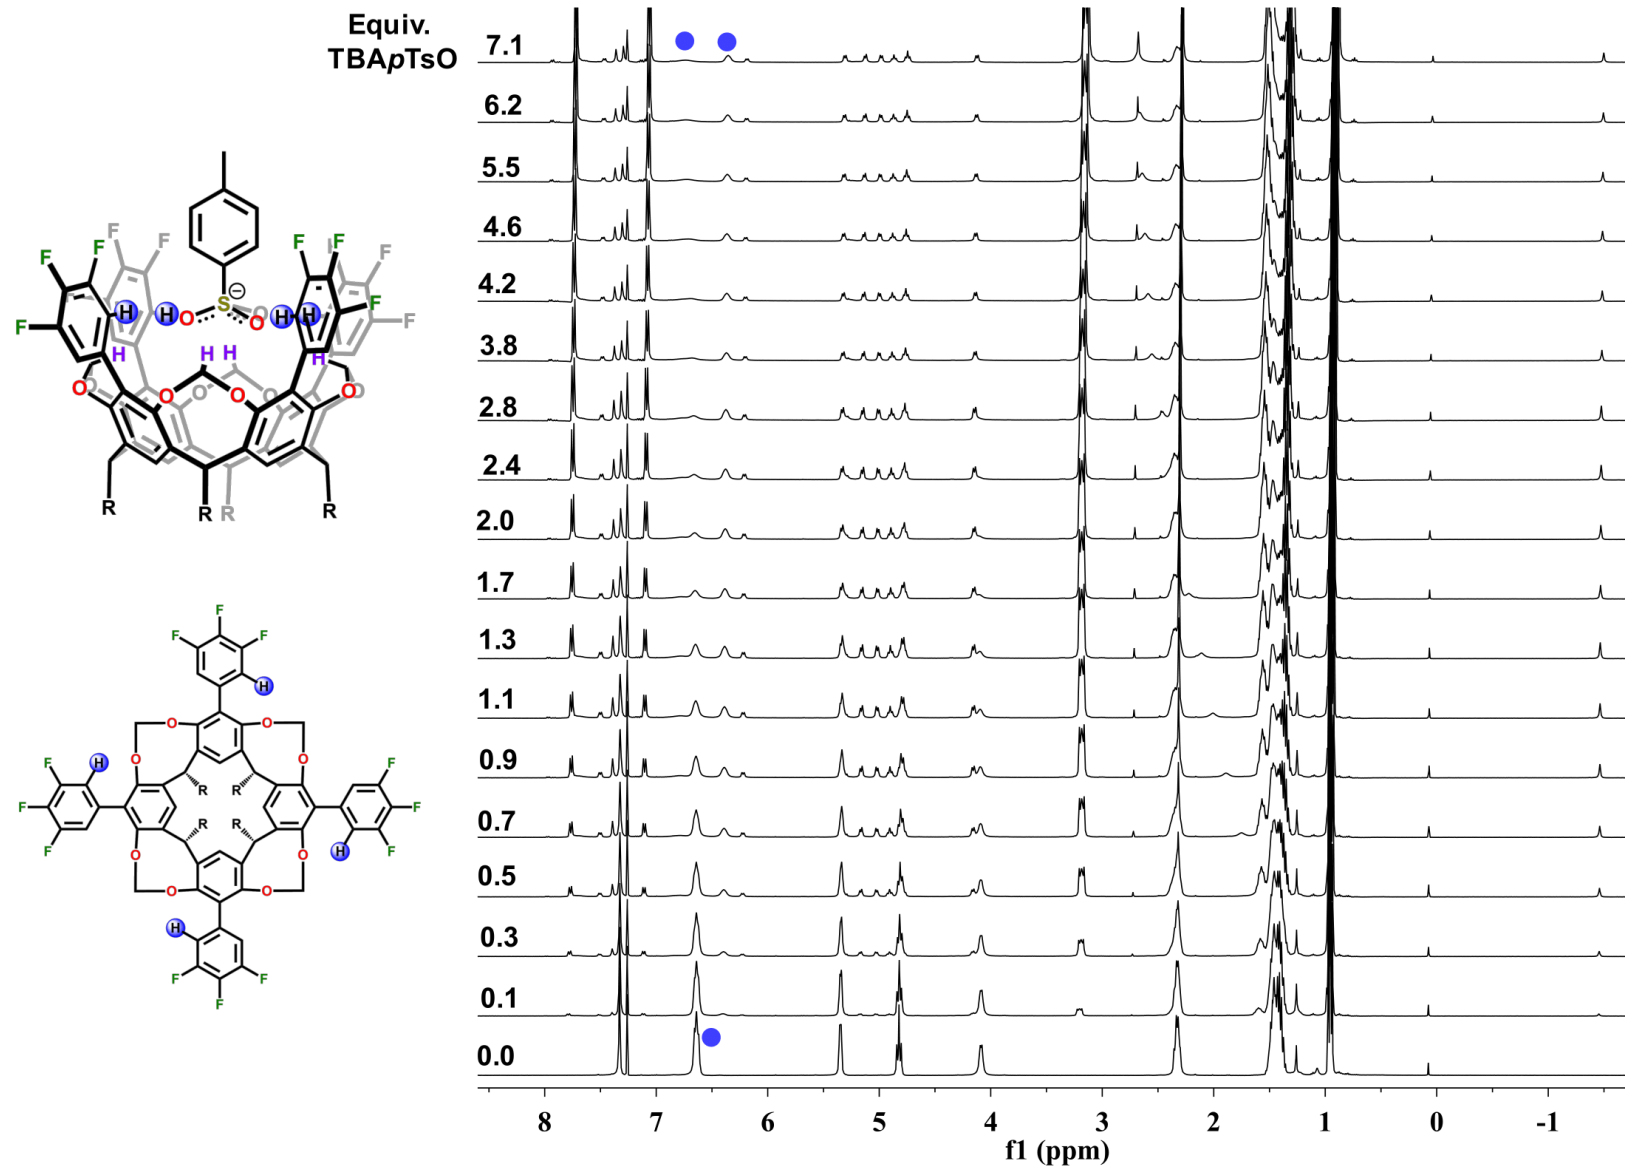

Figure S59.  $^1\text{H}$  NMR titration spectra of  $[n\text{-Bu}_4\text{N}][p\text{TsO}]$  added to **6** in  $\text{CDCl}_3$  at  $20^\circ\text{C}$ .

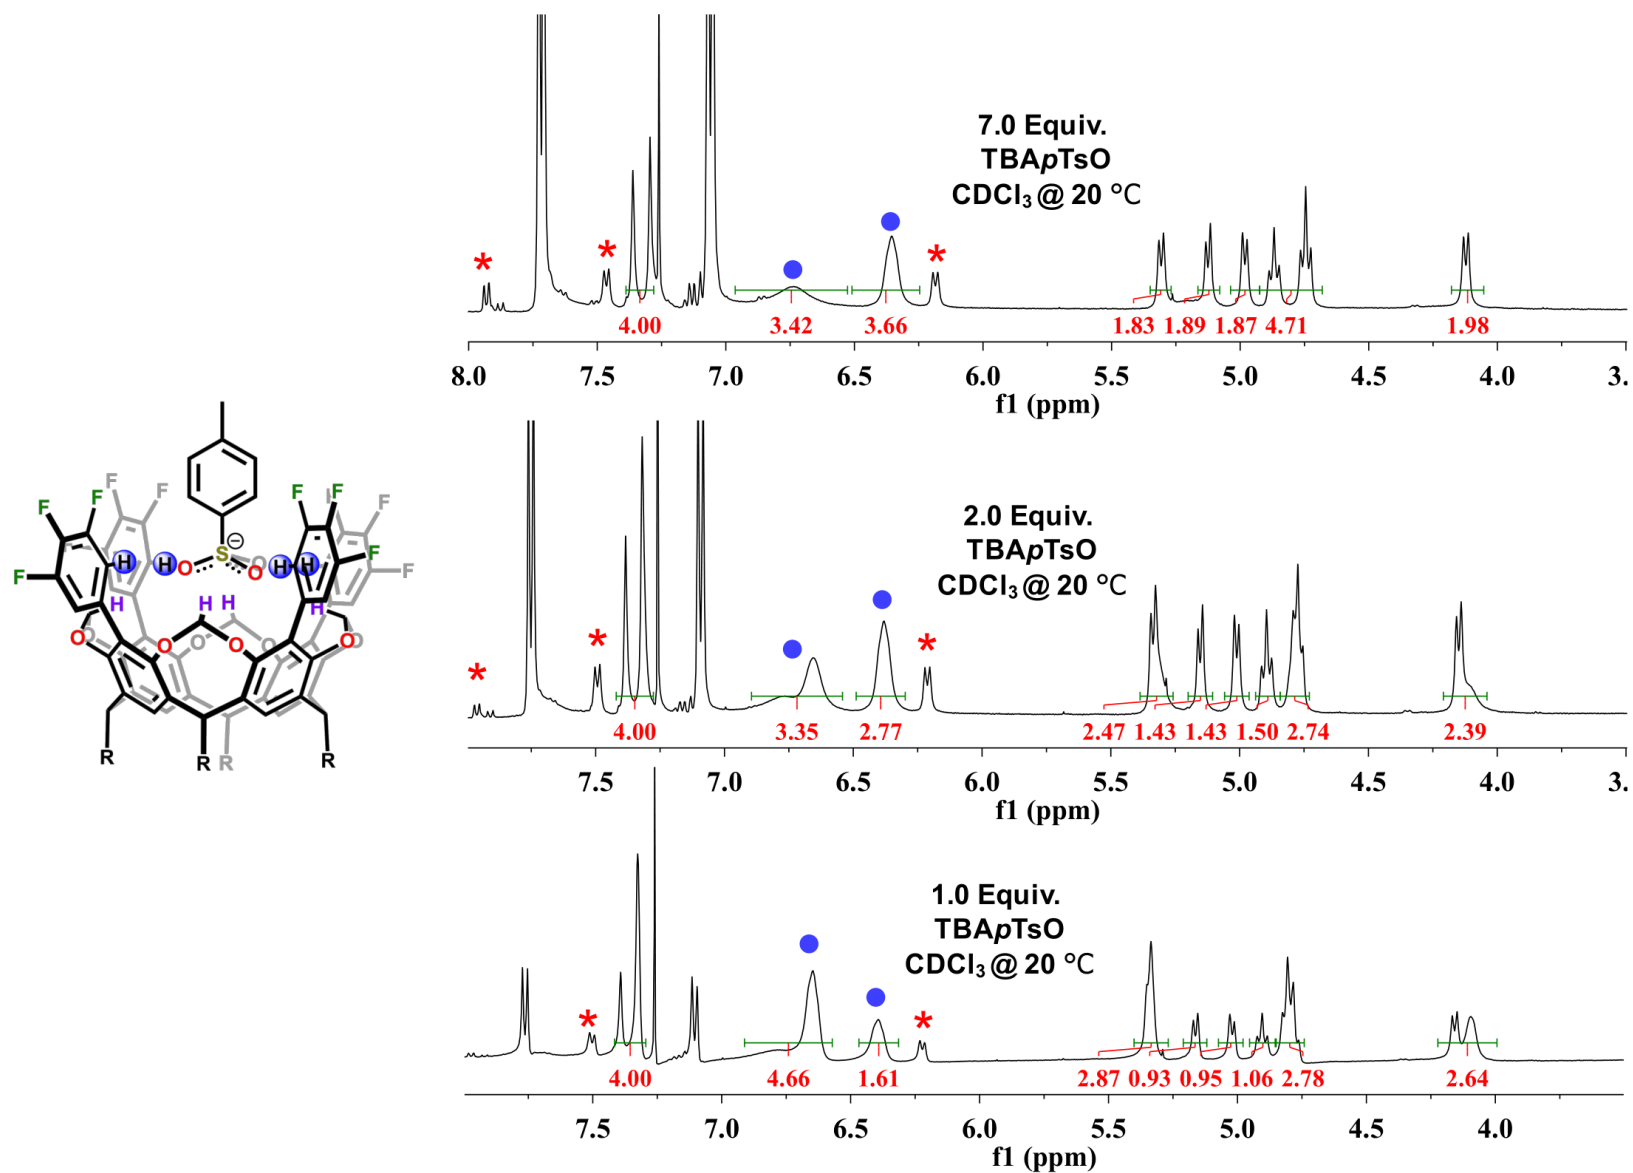

**Figure S60.** Zoomed-in <sup>1</sup>H NMR titration spectra of [*n*-Bu<sub>4</sub>N][*p*TsO] added to **6** in CDCl<sub>3</sub> at 20 °C (asterisk sign shows impurities from [*n*-Bu<sub>4</sub>N][*p*TsO]).

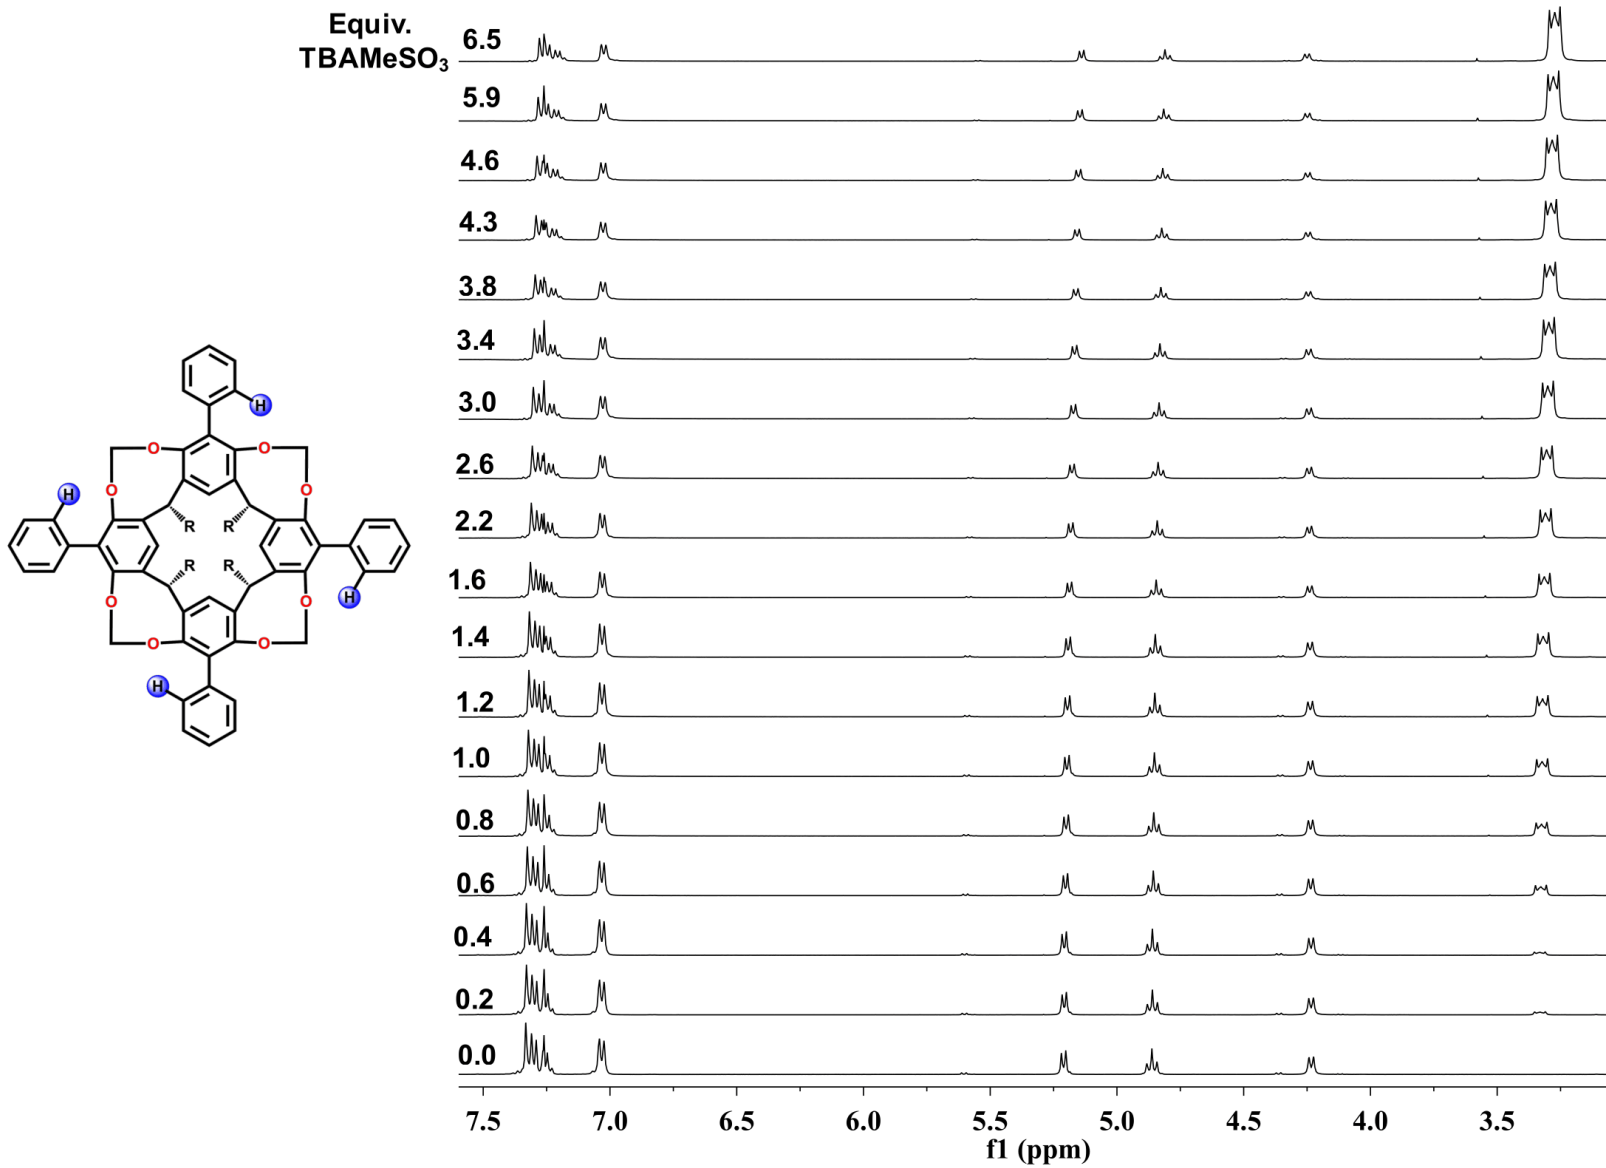

**Figure S61.**  $^1\text{H}$  NMR titration spectra of  $[n\text{-Bu}_4\text{N}][\text{MeSO}_3]$  added to **1** in  $\text{CDCl}_3$  at  $20\text{ }^\circ\text{C}$ .



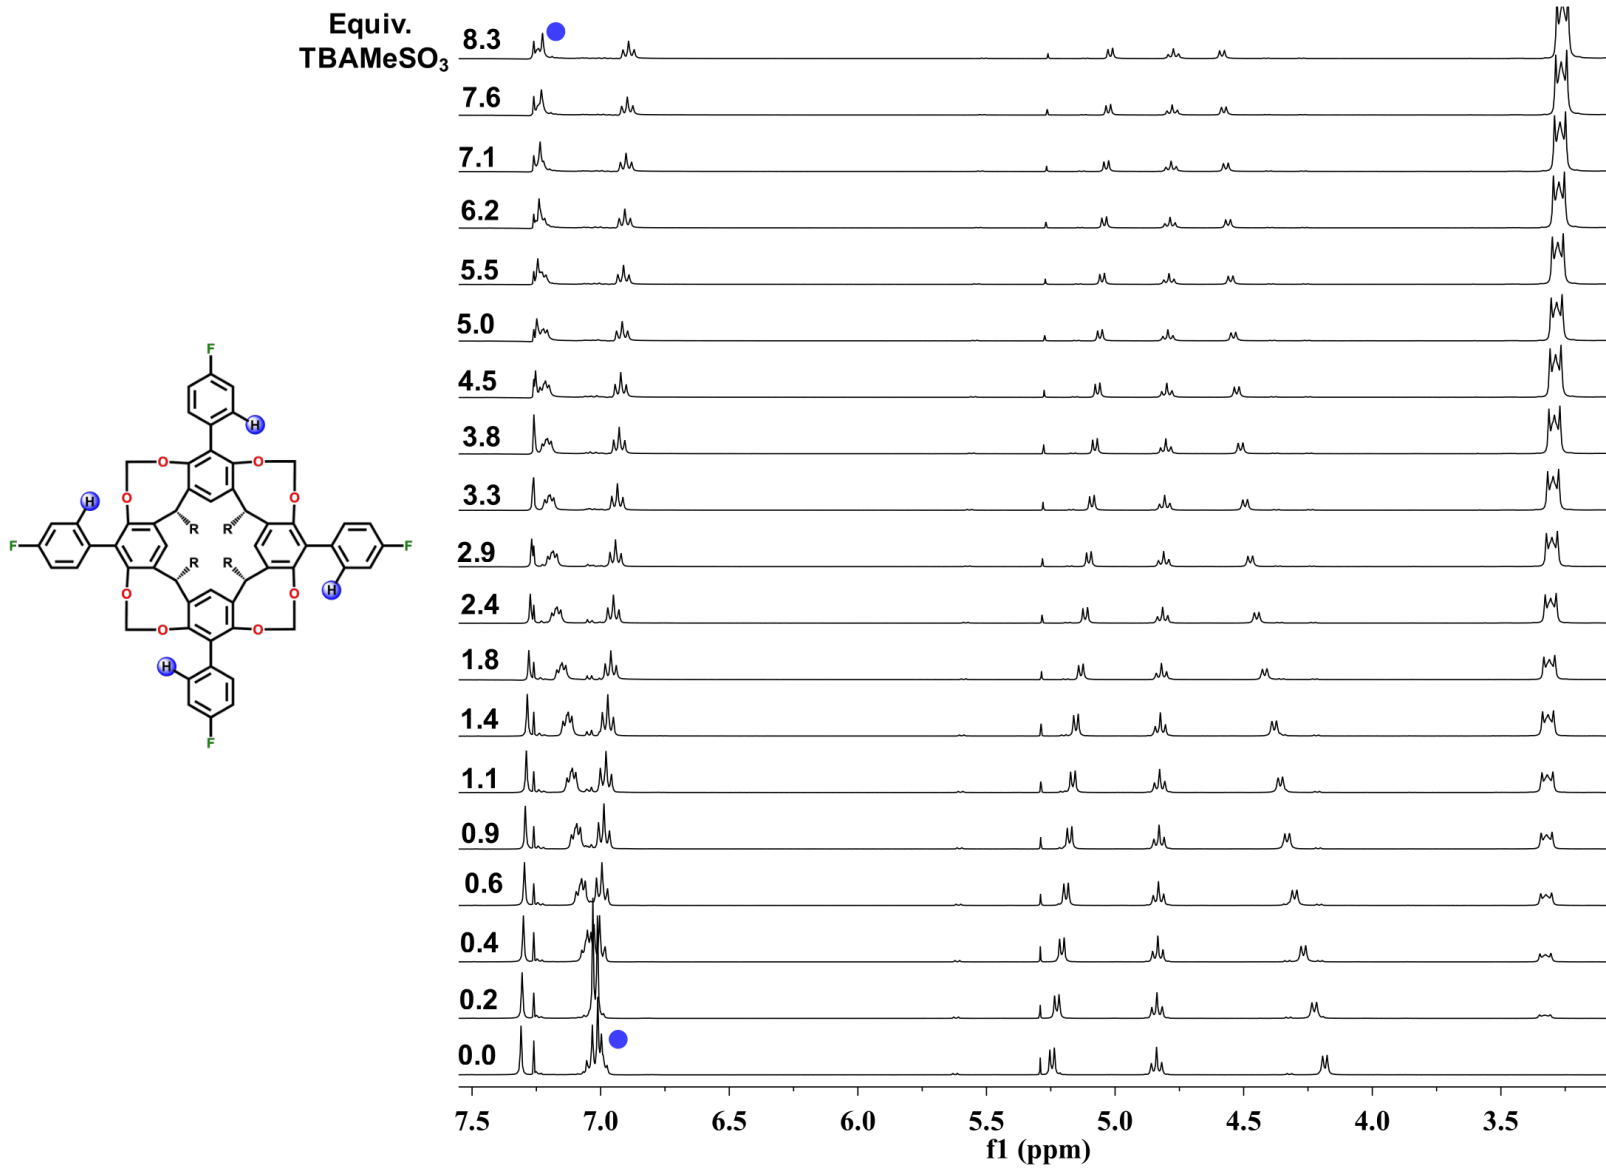

**Figure S62.** <sup>1</sup>H NMR titration spectra of [*n*-Bu<sub>4</sub>N][MeSO<sub>3</sub>] added to **2** in CDCl<sub>3</sub> at 20 °C.

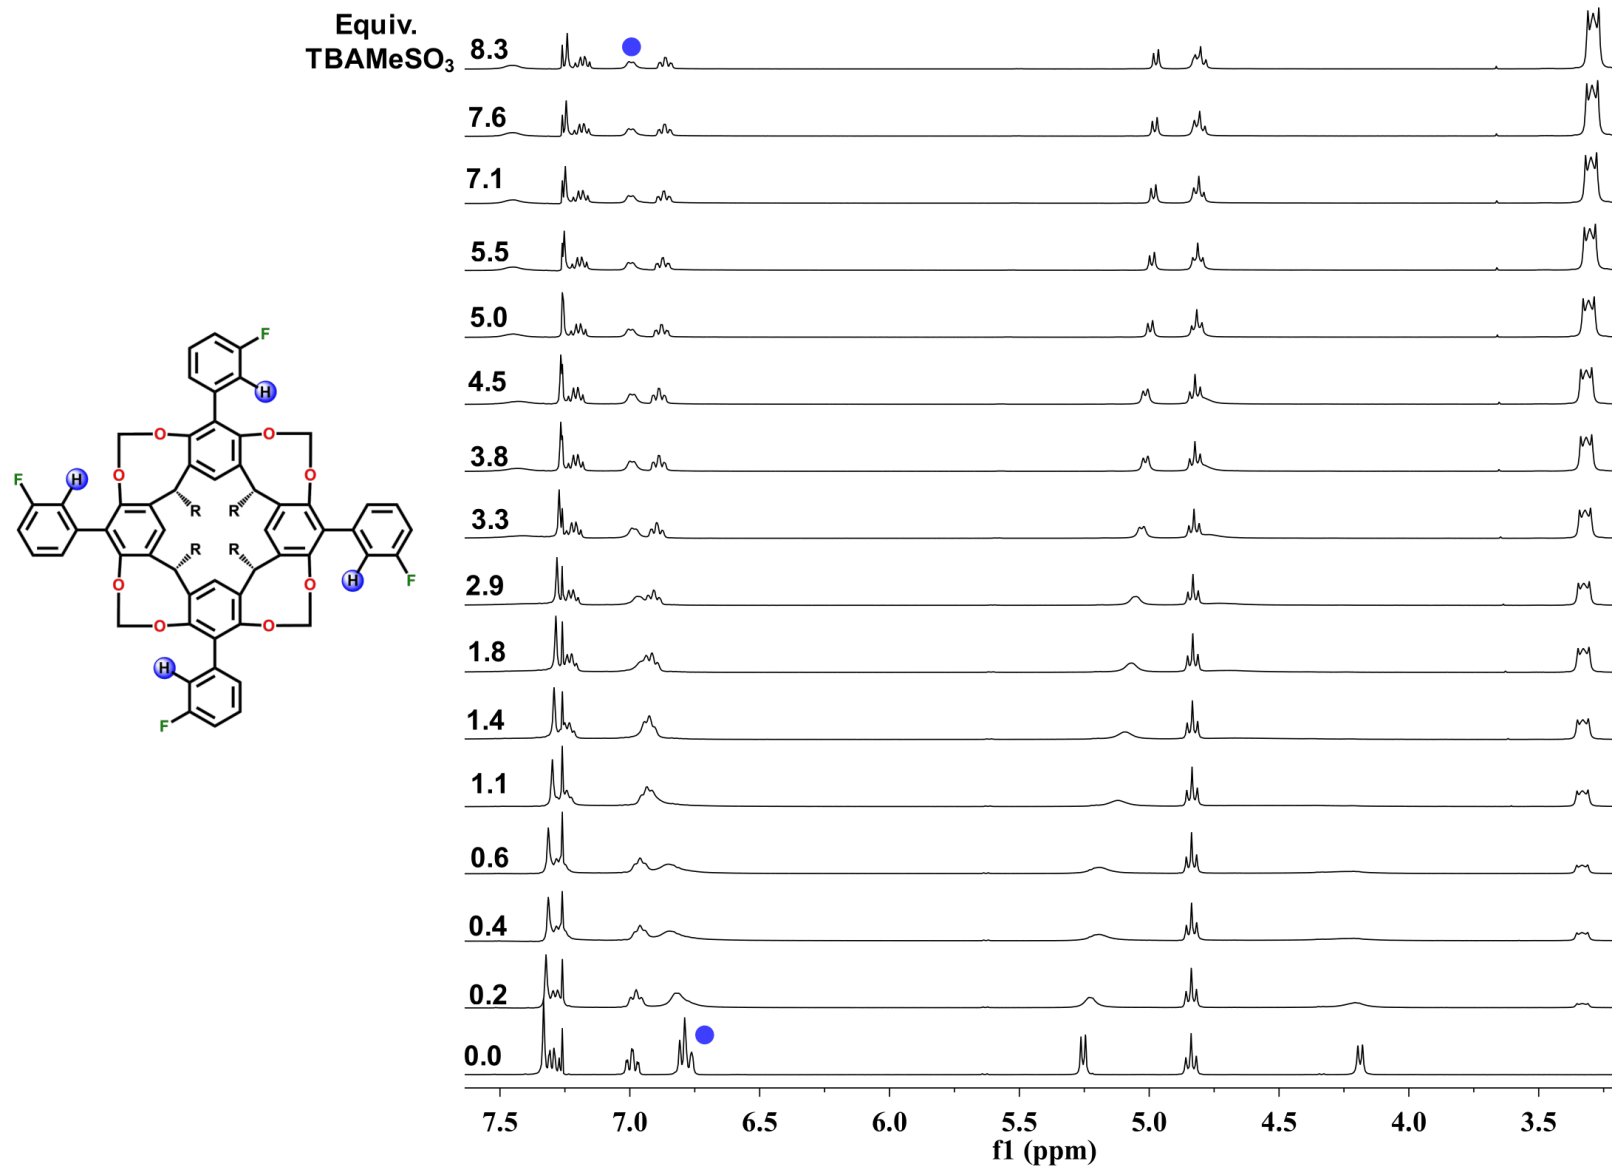

**Figure S63.**  $^1\text{H}$  NMR titration spectra of  $[n\text{-Bu}_4\text{N}][\text{MeSO}_3]$  added to **3** in  $\text{CDCl}_3$  at 20 °C.

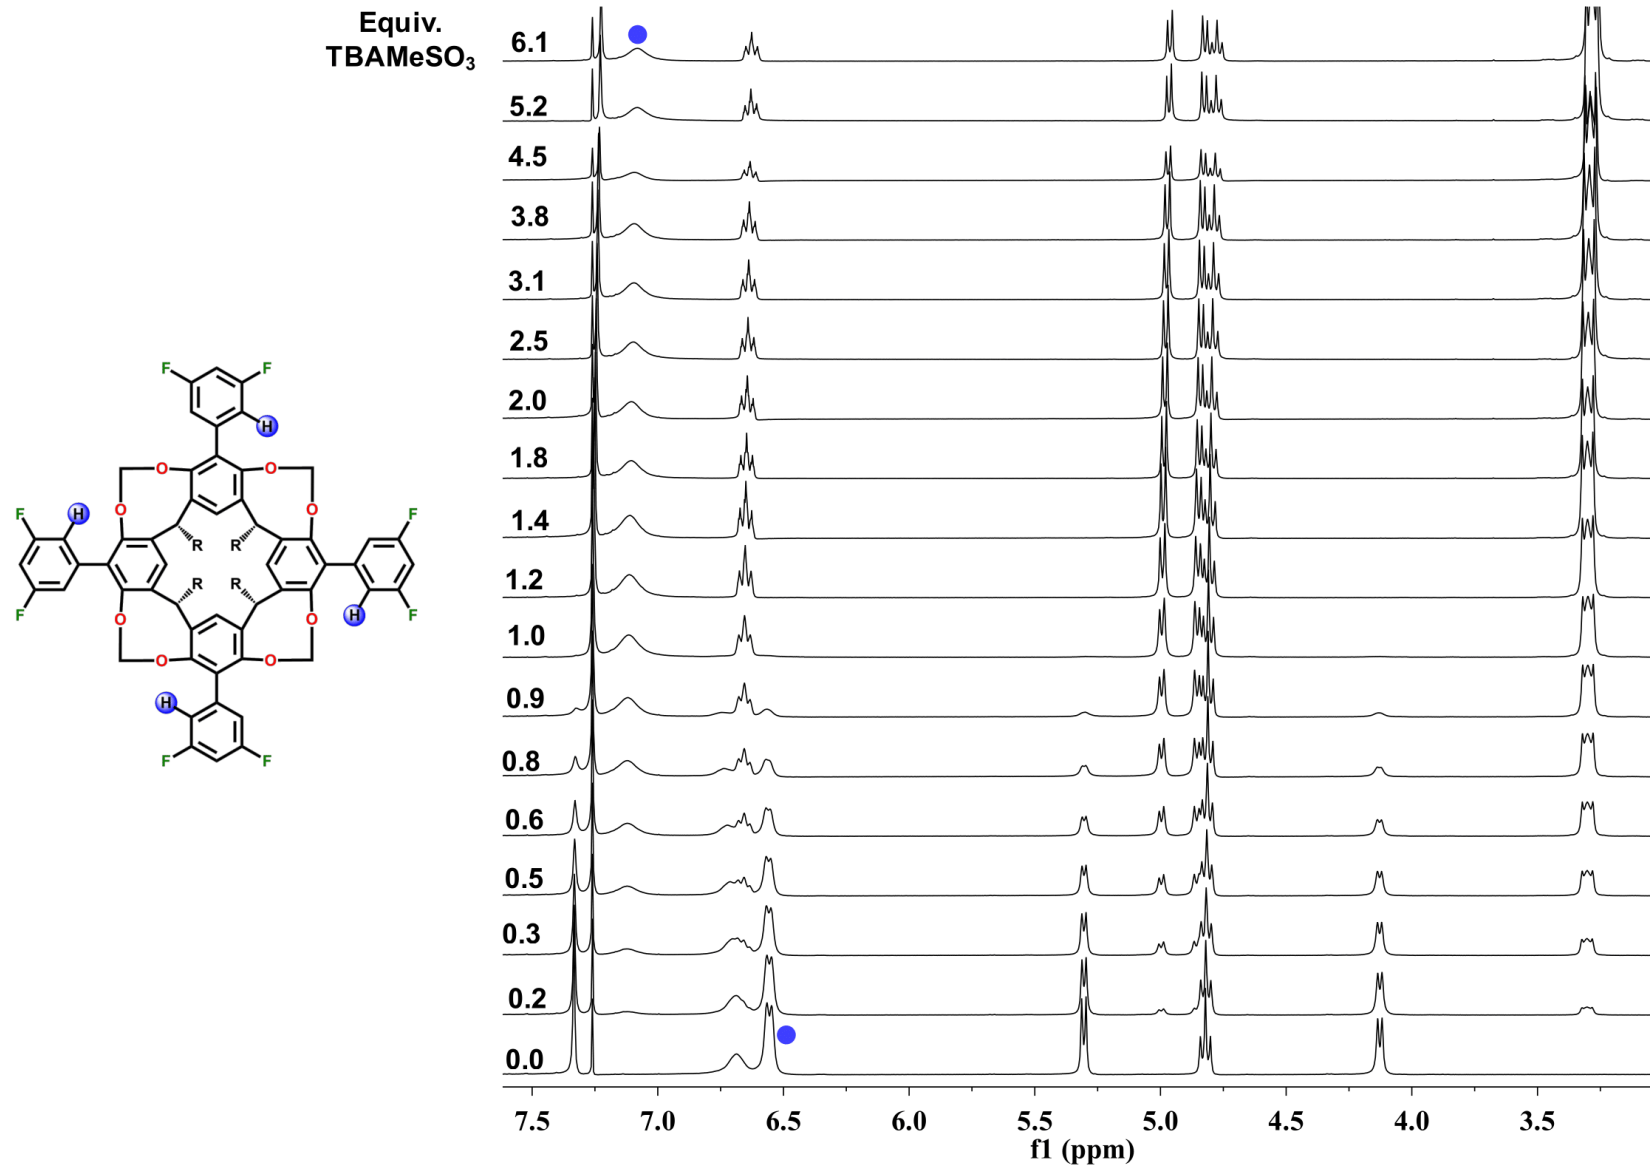

**Figure S64.** <sup>1</sup>H NMR titration spectra of [*n*-Bu<sub>4</sub>N][MeSO<sub>3</sub>] added to **4** in CDCl<sub>3</sub> at 20 °C.

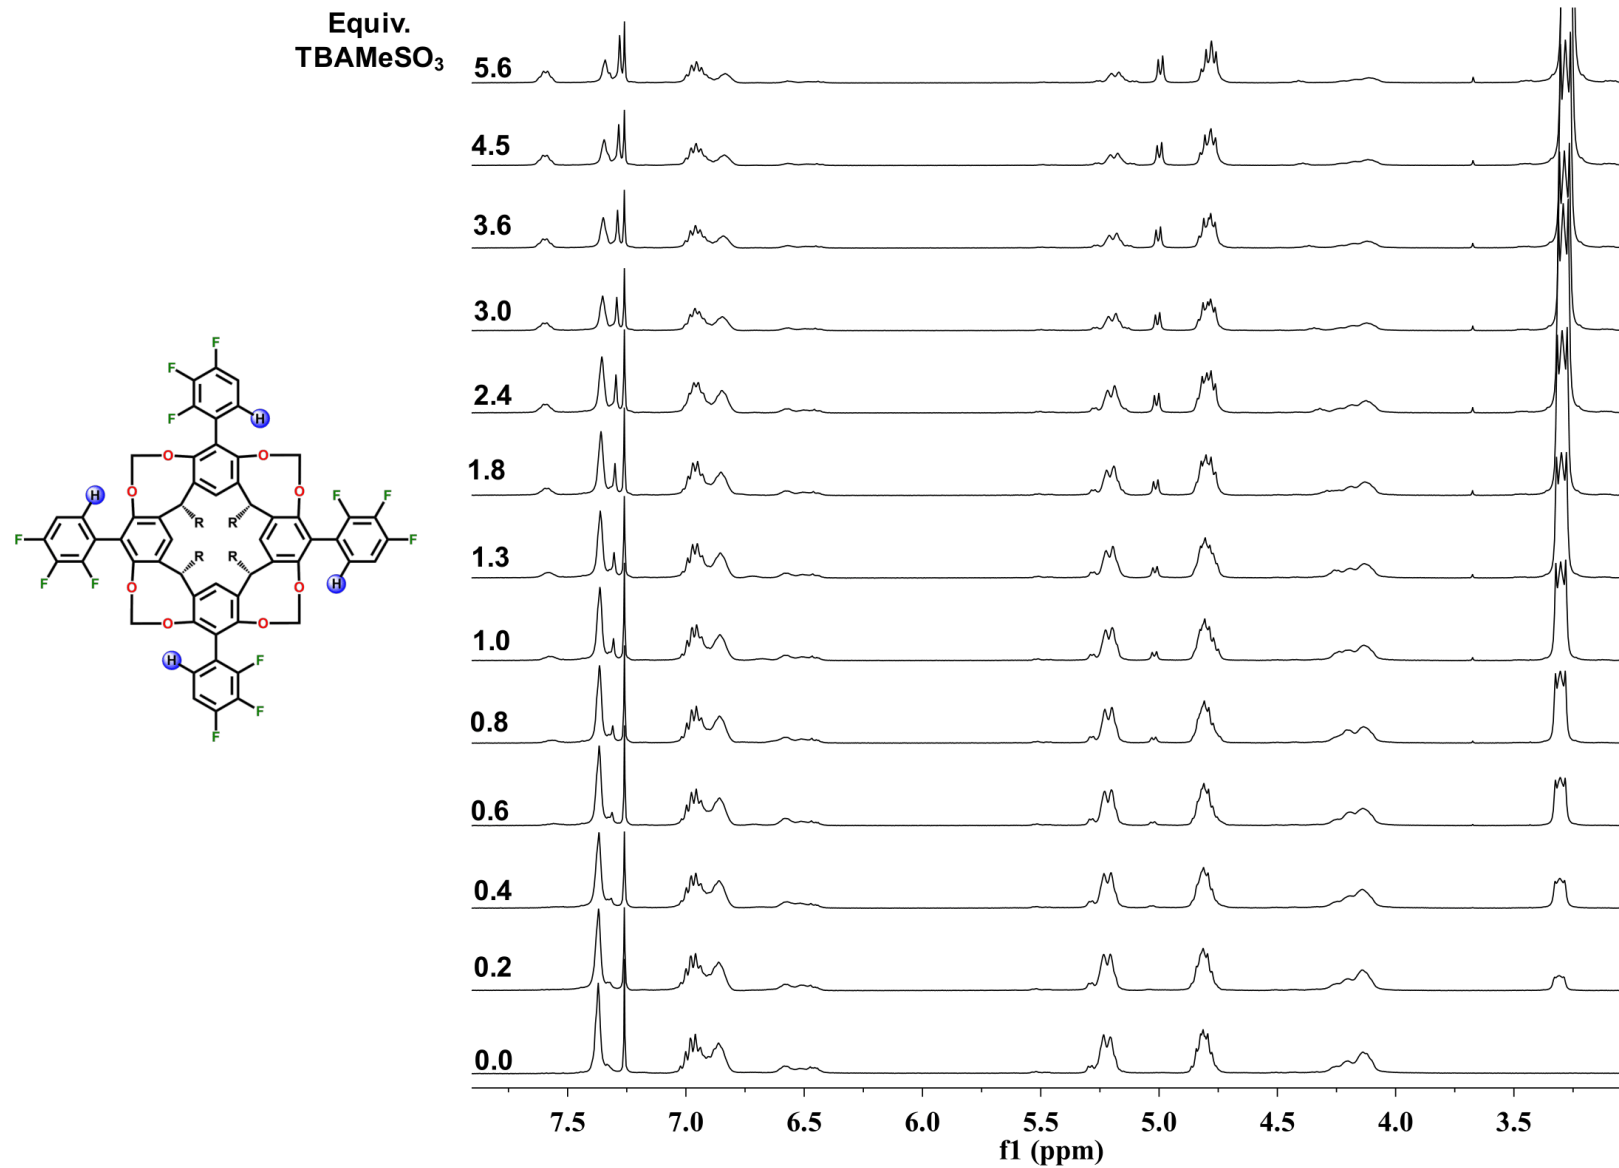

**Figure S65.** <sup>1</sup>H NMR titration spectra of [*n*-Bu<sub>4</sub>N][MeSO<sub>3</sub>] added to **5** in CDCl<sub>3</sub> at 20 °C.

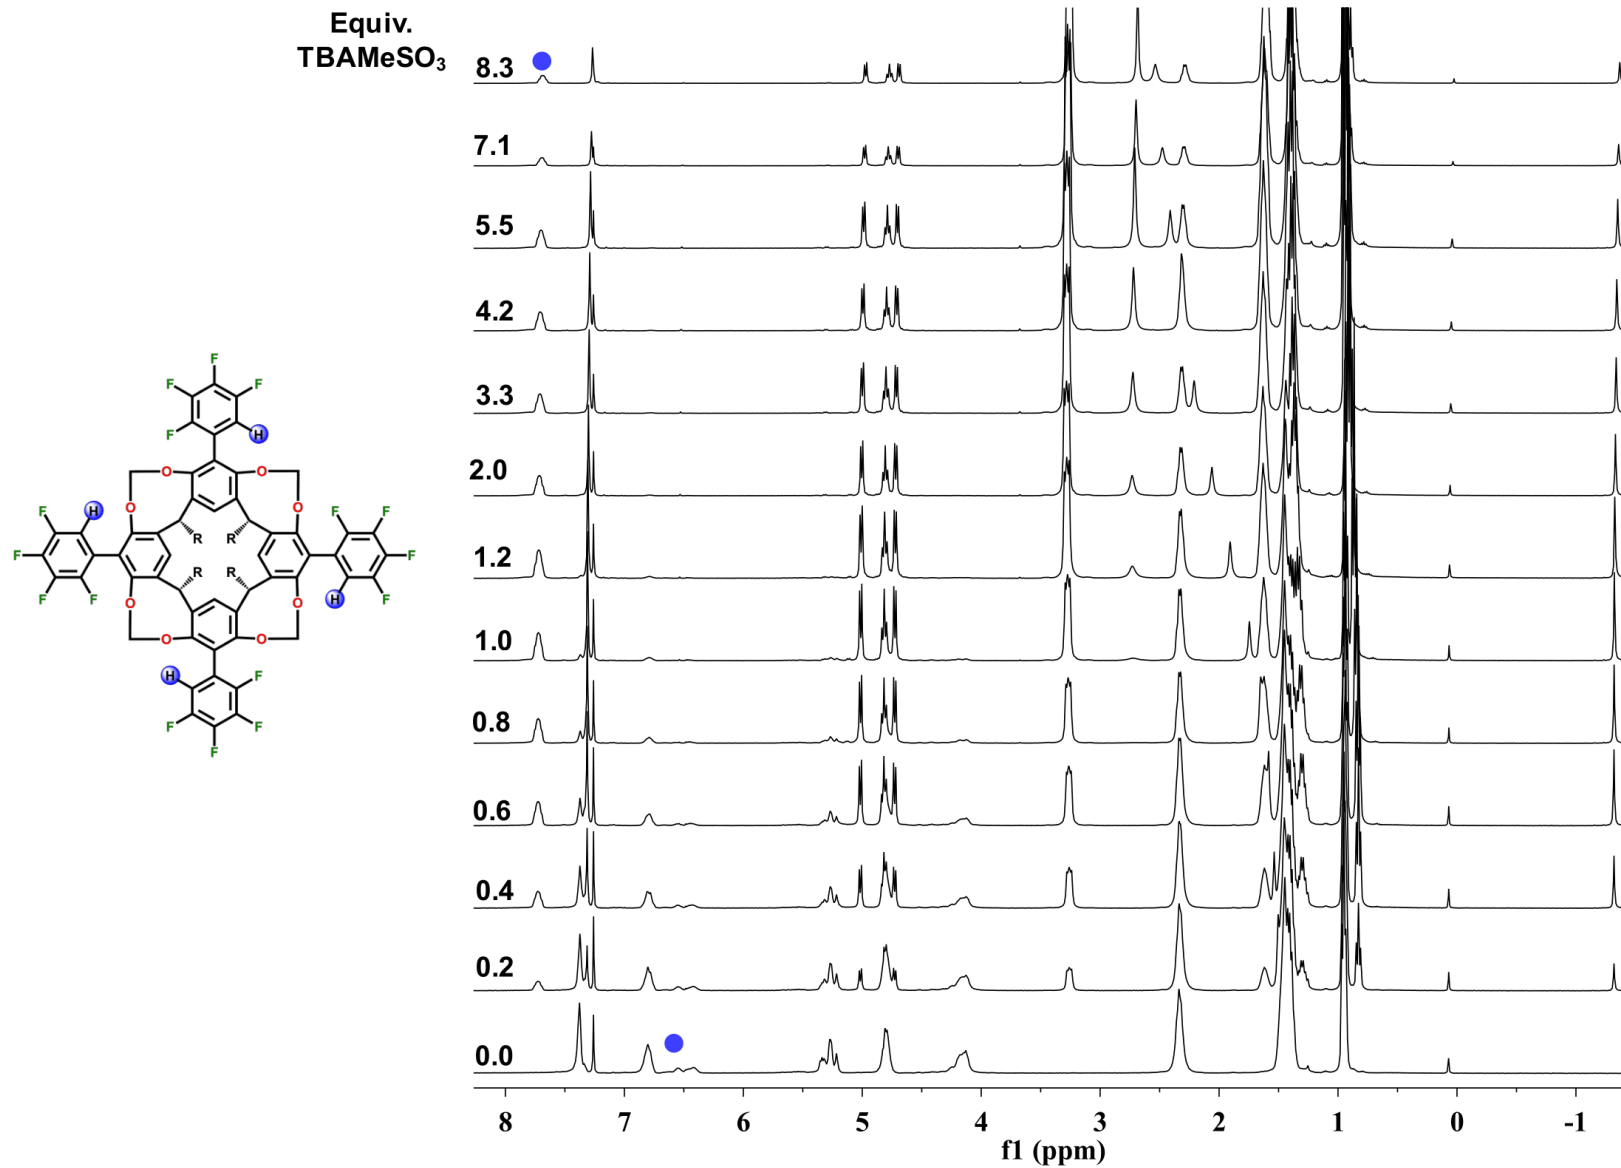

**Figure S66.** <sup>1</sup>H NMR titration spectra of [*n*-Bu<sub>4</sub>N][MeSO<sub>3</sub>] added to **7** in CDCl<sub>3</sub> at 20 °C.

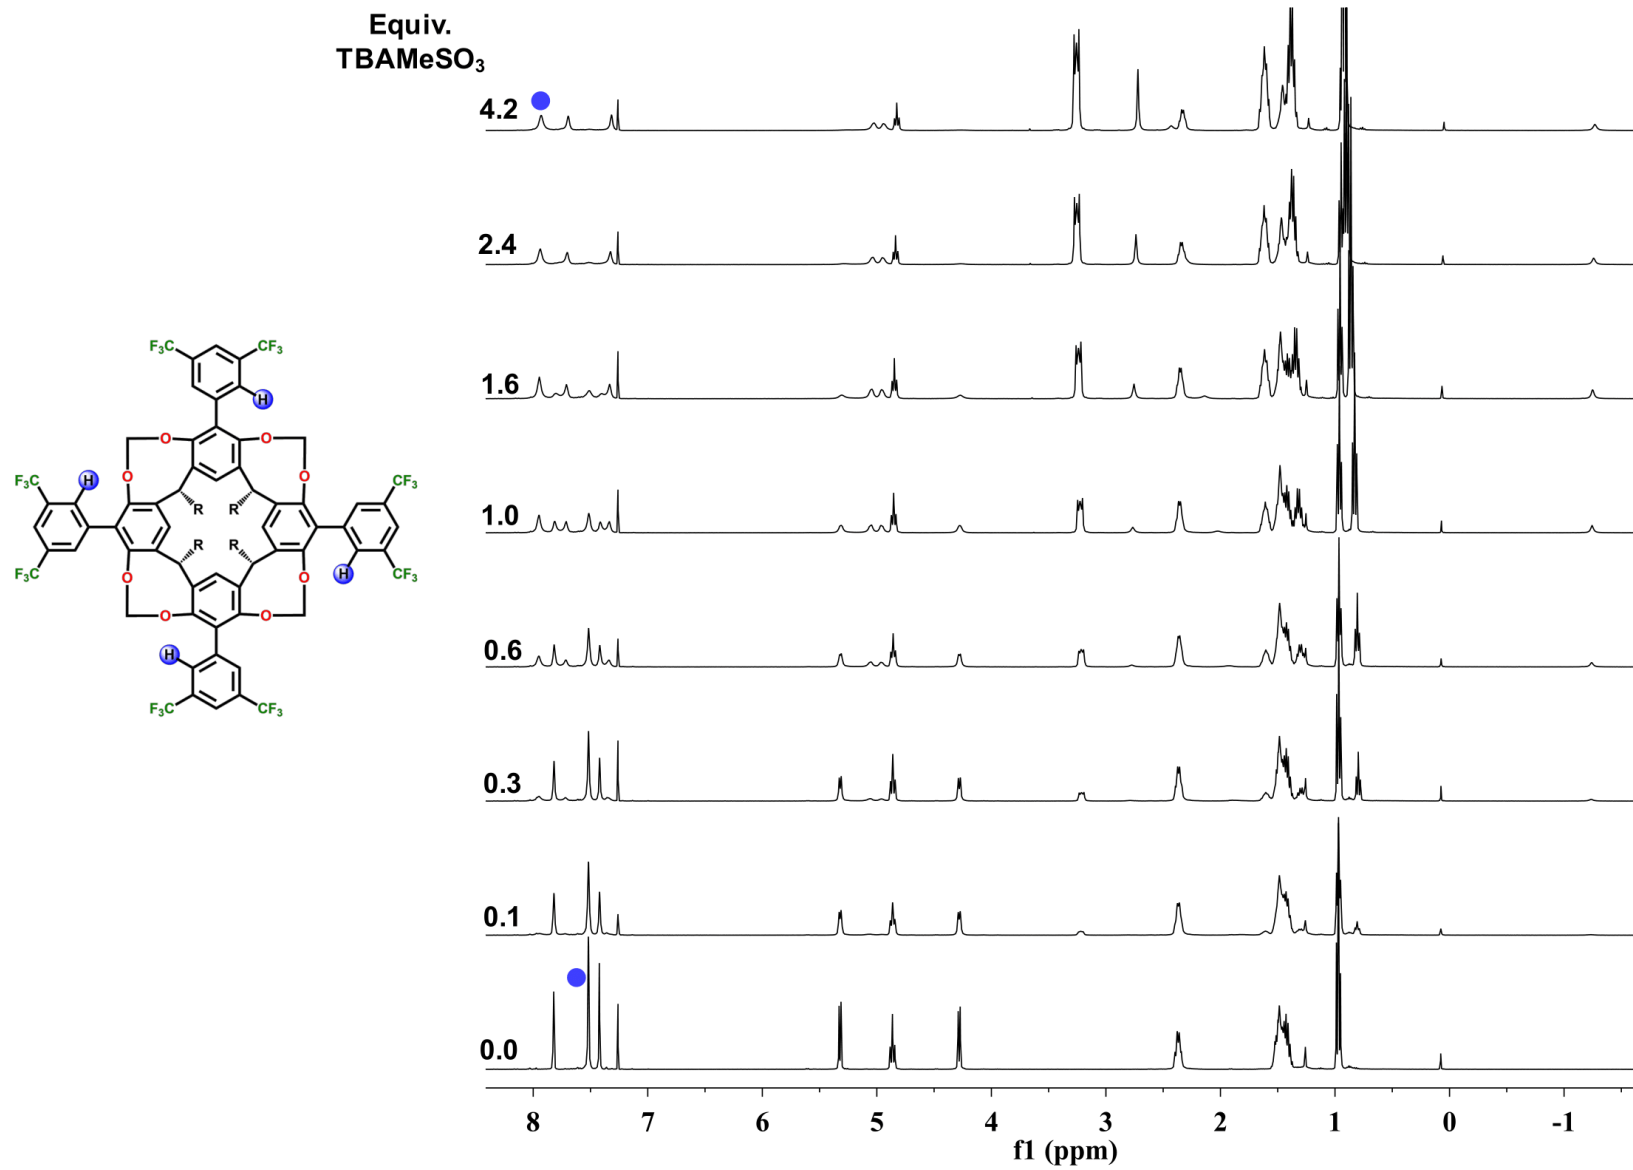

**Figure S67.** <sup>1</sup>H NMR titration spectra of [*n*-Bu<sub>4</sub>N][MeSO<sub>3</sub>] added to **8** in CDCl<sub>3</sub> at 20 °C.

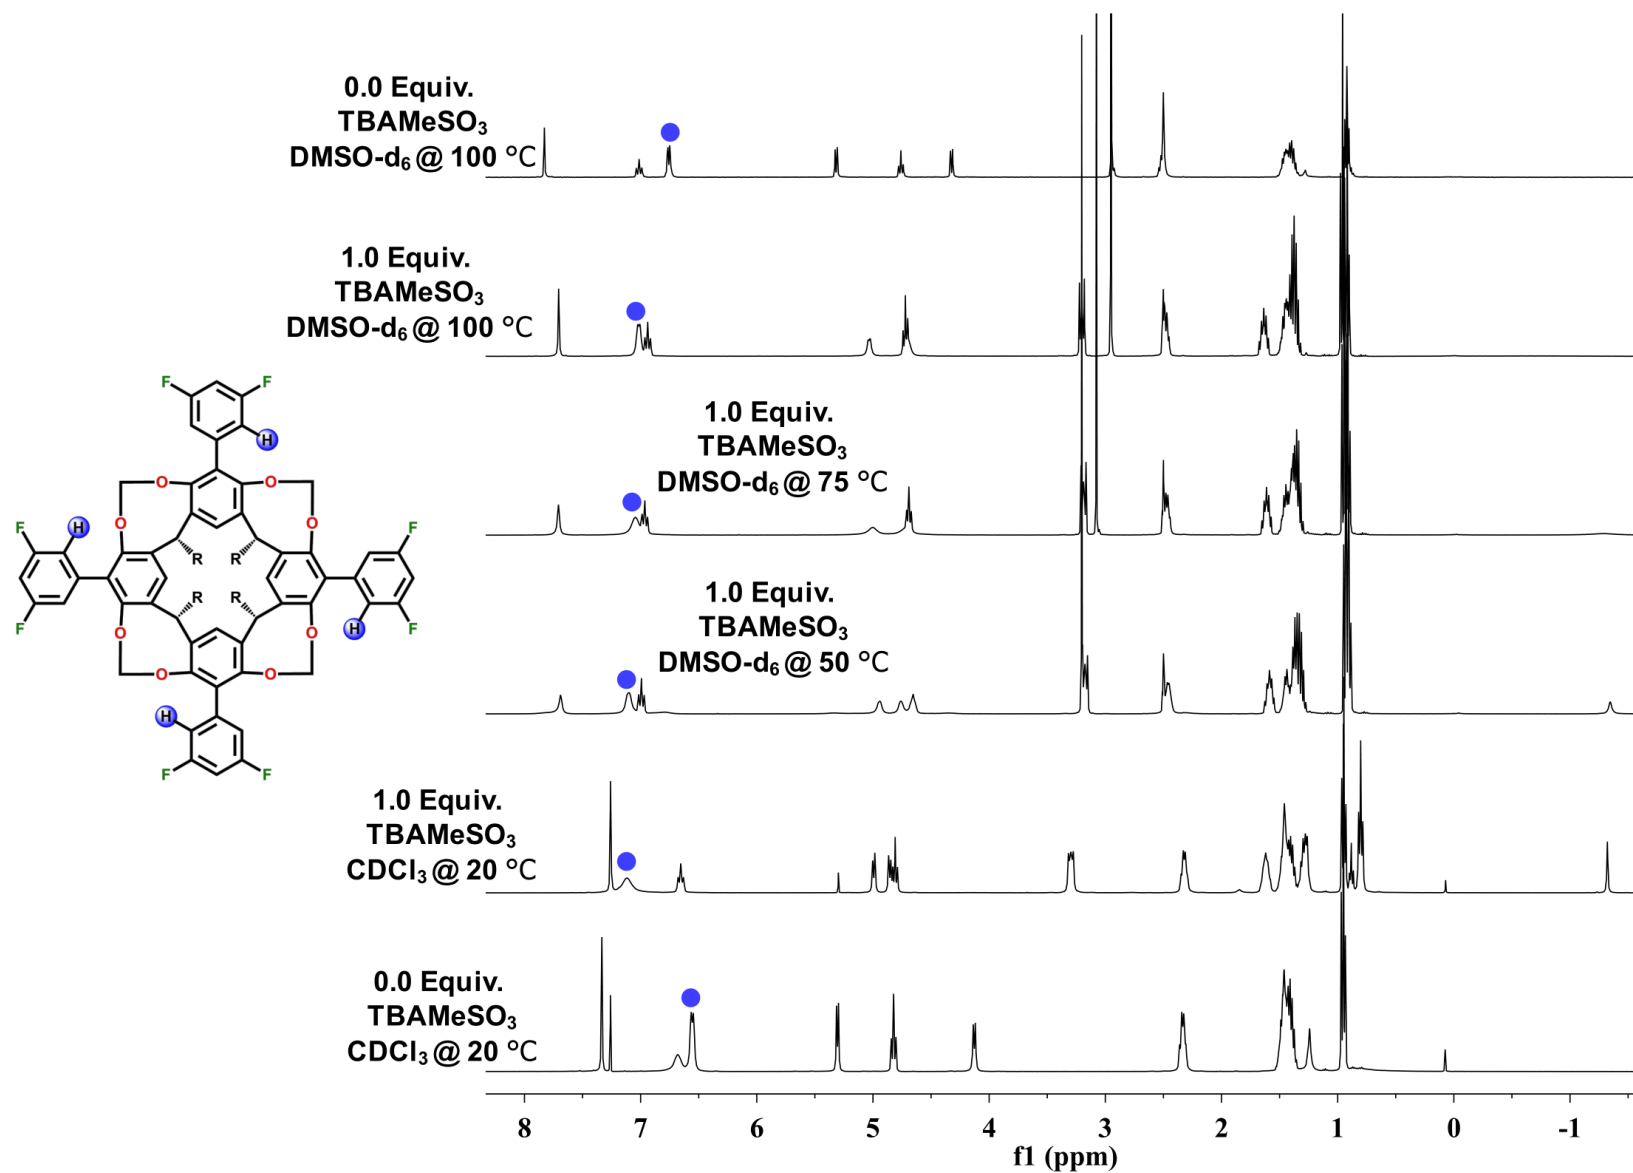

**Figure S68.** <sup>1</sup>H NMR spectra of 1 eq [*n*-Bu<sub>4</sub>N][MeSO<sub>3</sub>] added to **4** in CDCl<sub>3</sub> and DMSO-*d*<sub>6</sub>.

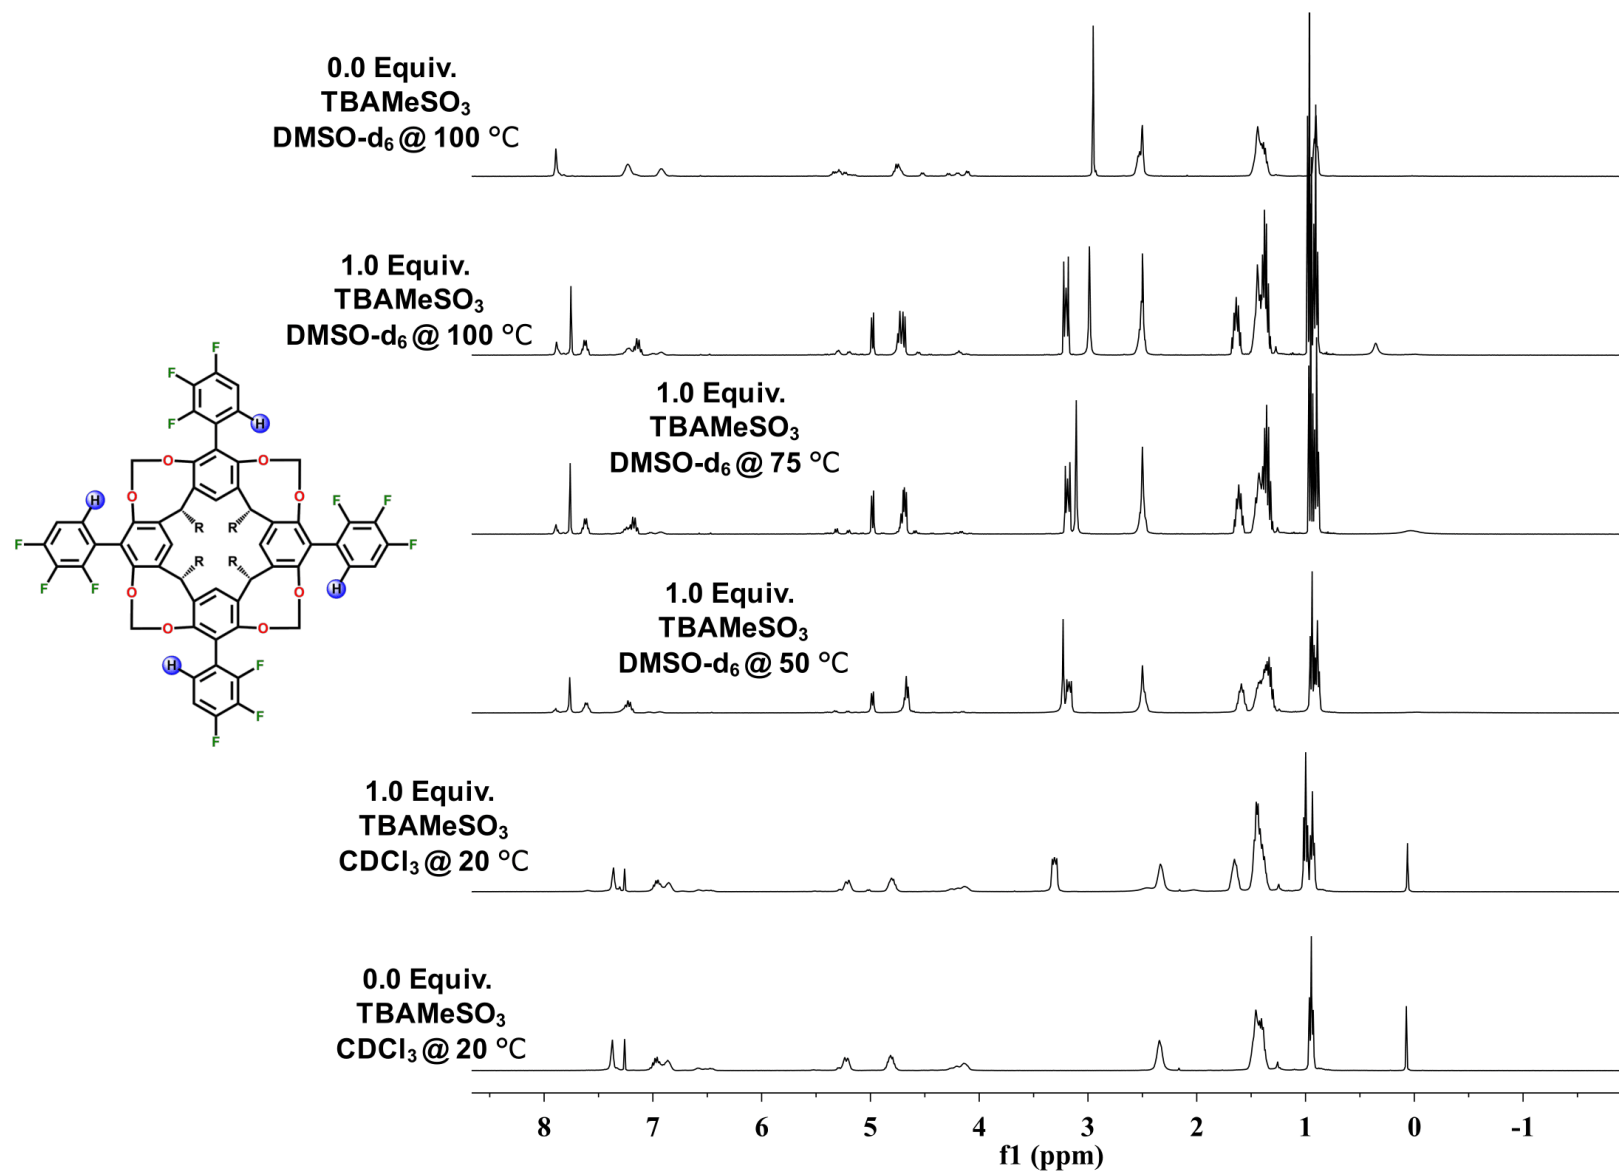

**Figure S69.** <sup>1</sup>H NMR spectra of 1 eq [*n*-Bu<sub>4</sub>N][MeSO<sub>3</sub>] added to **5** in CDCl<sub>3</sub> and DMSO-*d*<sub>6</sub>.



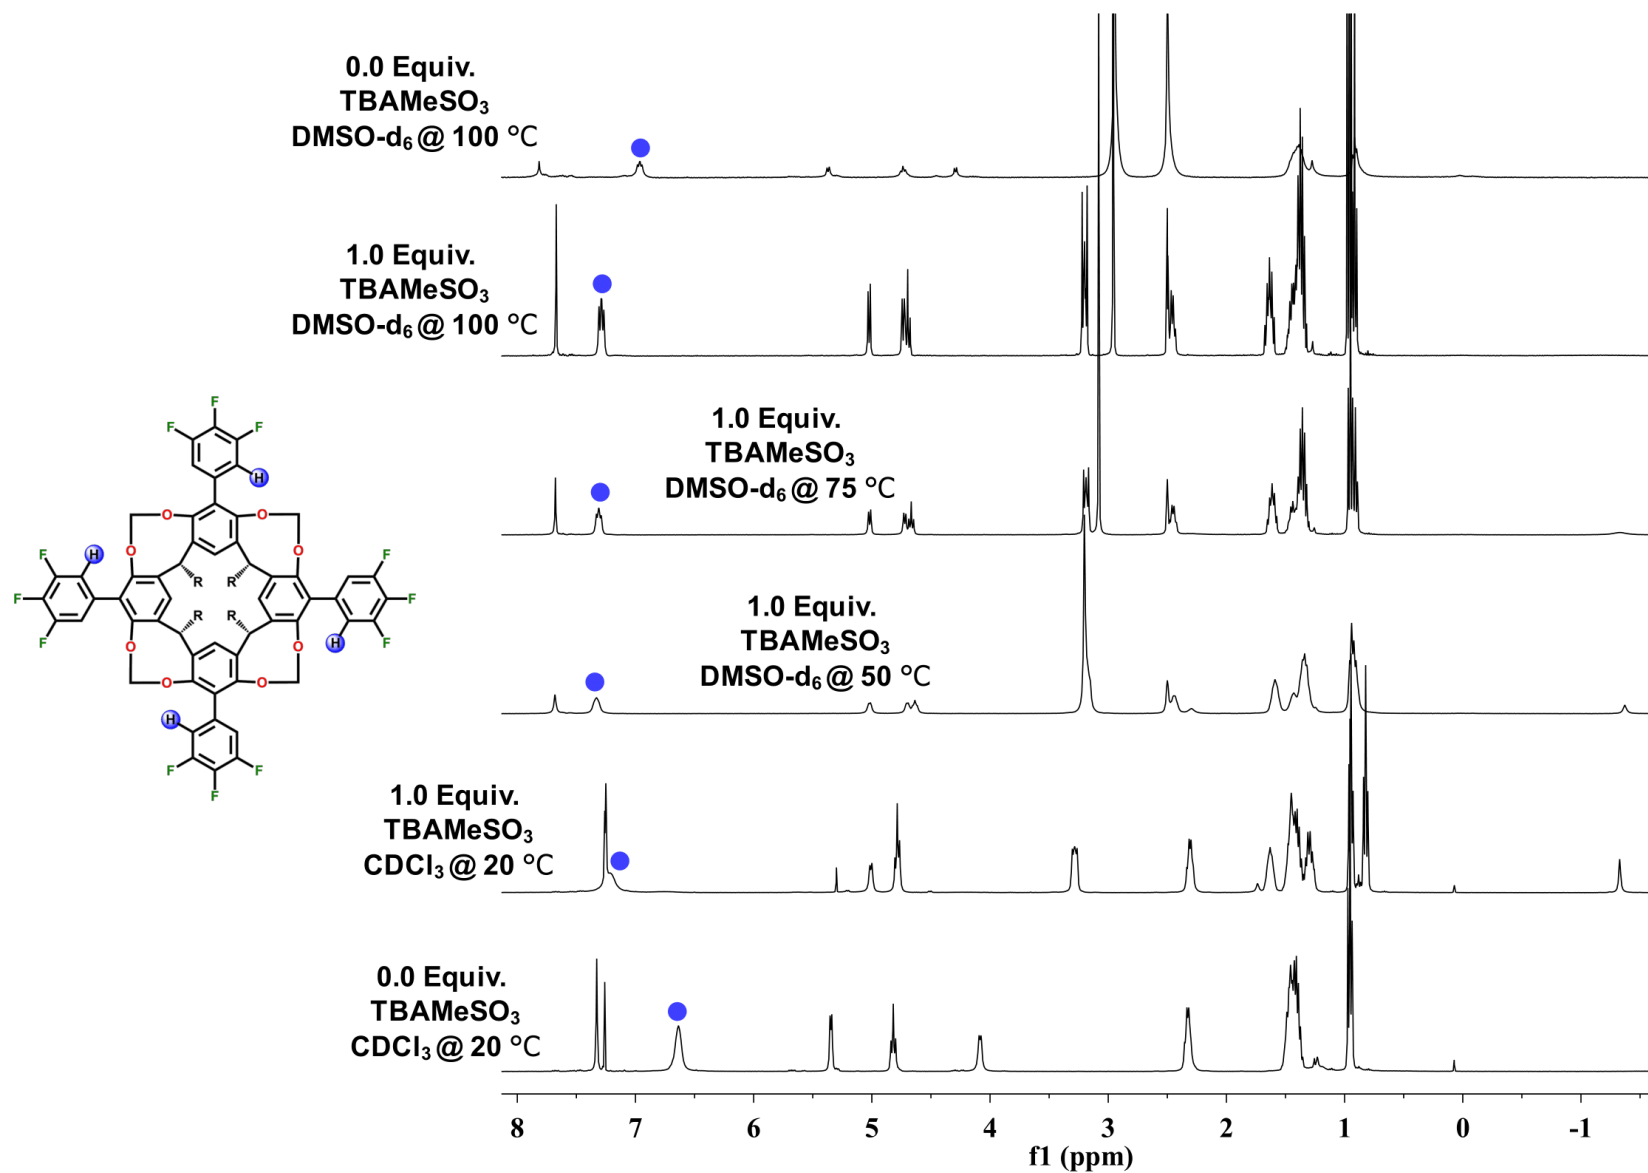

**Figure S70.** <sup>1</sup>H NMR spectra of 1 eq [*n*-Bu<sub>4</sub>N][MeSO<sub>3</sub>] added to **6** in CDCl<sub>3</sub> and DMSO-*d*<sub>6</sub>.

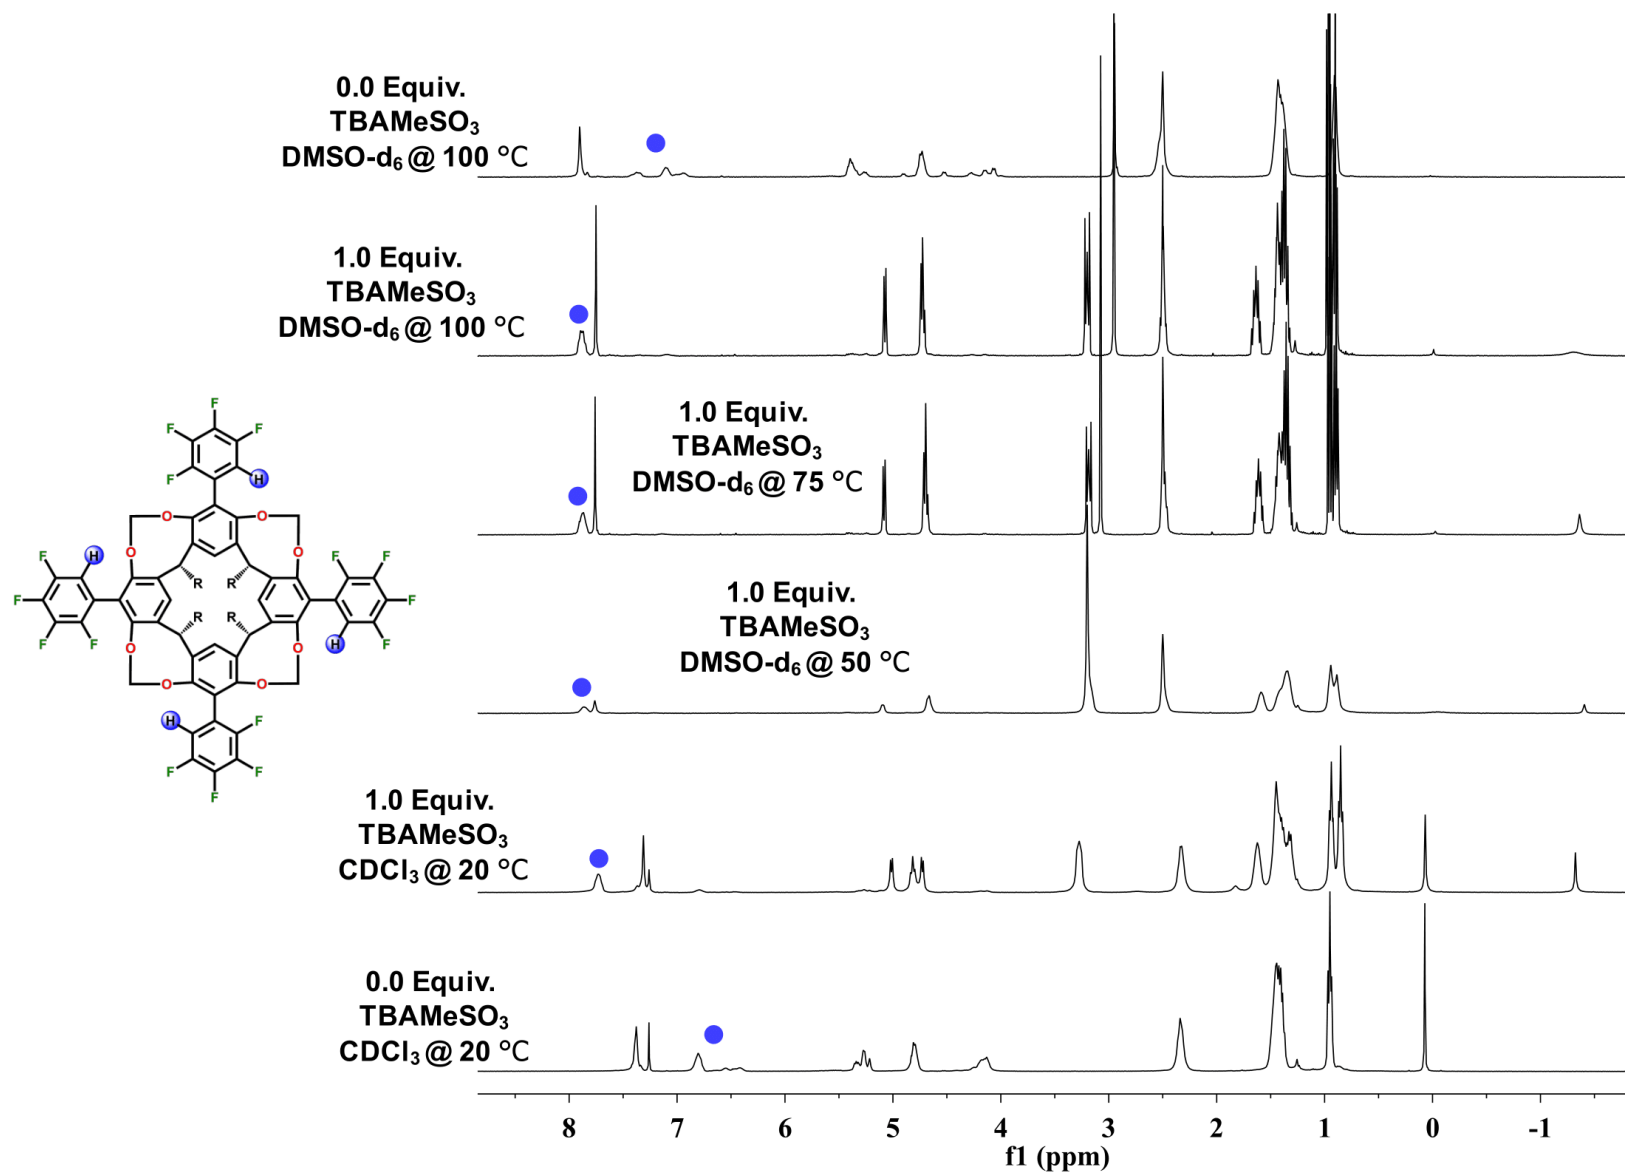

**Figure S71.** <sup>1</sup>H NMR spectra of 1 eq [*n*-Bu<sub>4</sub>N][MeSO<sub>3</sub>] added to 7 in CDCl<sub>3</sub> and DMSO-*d*<sub>6</sub>.

**Table S2.** DFT calculated conformational energies of the six possible rotamers of **5** at the M062X/6-311++G(3df,2p)+CPCM(solvent)//M062X/6-31+G(d,p) level of theory, where solvent = CHCl<sub>3</sub> or DMSO. Provided in this table are the relative energy ( $\Delta E+ZPE$ ), enthalpy ( $\Delta H$ ), and Gibbs free energy ( $\Delta G$ ) for these rotamers.

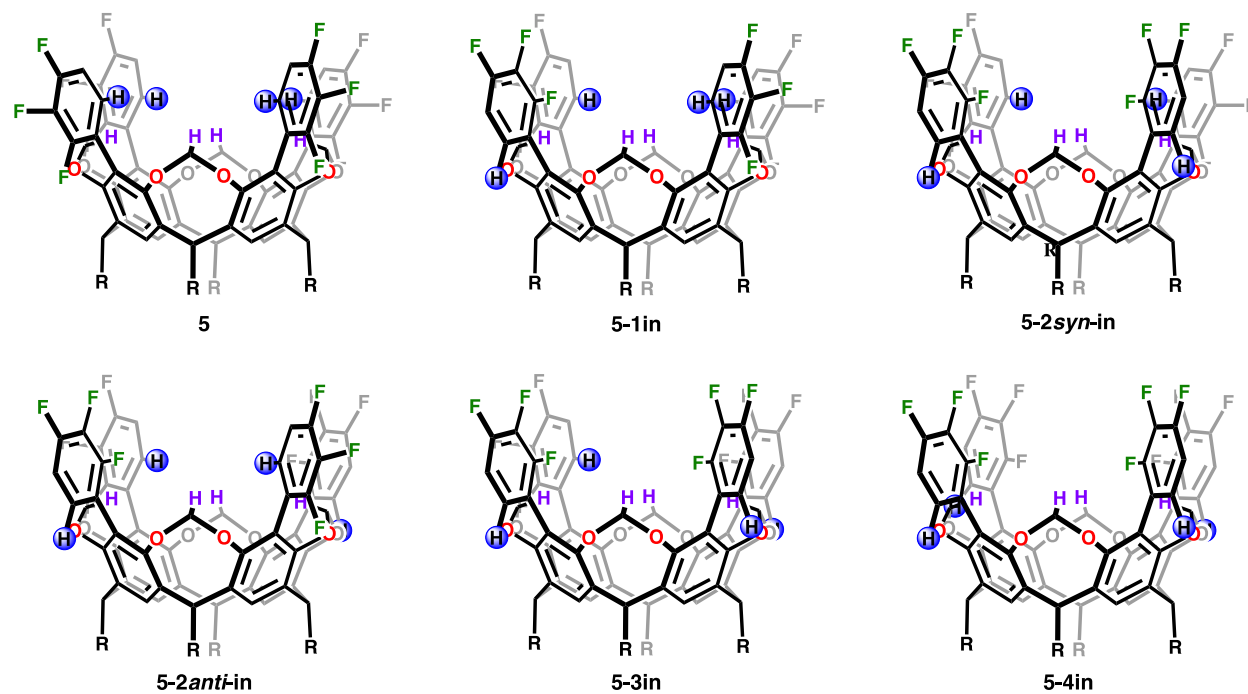

| Conformational energies in kcal/mol |          |              |                  |                   |              |              |
|-------------------------------------|----------|--------------|------------------|-------------------|--------------|--------------|
| CHCl <sub>3</sub>                   |          |              |                  |                   |              |              |
|                                     | <b>5</b> | <b>5-1in</b> | <b>5-2syn-in</b> | <b>5-2anti-in</b> | <b>5-3in</b> | <b>5-4in</b> |
| $\Delta E+ZPE$                      | 0.0      | -0.6         | -0.7             | -0.8              | -0.6         | -0.1         |
| $\Delta H$                          | 0.0      | -0.5         | -0.7             | -0.8              | -0.6         | -0.2         |
| $\Delta G$                          | 0.0      | -1.8         | -0.5             | -0.7              | -1.1         | 0.2          |
| DMSO                                |          |              |                  |                   |              |              |
| $\Delta E+ZPE$                      | 0.0      | 0.0          | 0.4              | 0.4               | 0.7          | 1.3          |
| $\Delta H$                          | 0.0      | 0.1          | 0.3              | 0.3               | 0.7          | 1.3          |
| $\Delta G$                          | 0.0      | -1.2         | 0.5              | 0.5               | 0.2          | 1.6          |

**Table S3.** DFT calculated conformational energies of the six possible rotamers of **7** at the M062X/6-311++G(3df,2p)+CPCM(solvent)//M062X/6-31+G(d,p) level of theory, where solvent = CHCl<sub>3</sub> or DMSO. Provided in this table are the relative energy ( $\Delta E+ZPE$ ), enthalpy ( $\Delta H$ ), and Gibbs free energy ( $\Delta G$ ) for these rotamers.

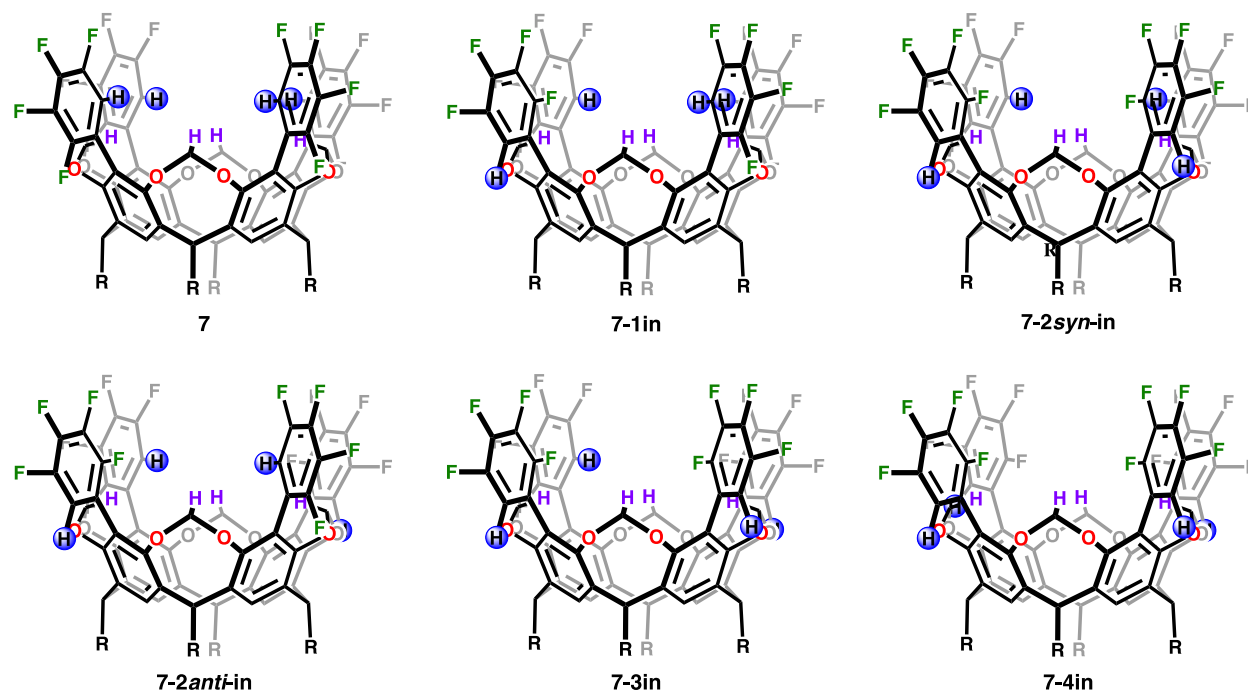

| Conformational energies in kcal/mol |          |              |                  |                   |              |              |
|-------------------------------------|----------|--------------|------------------|-------------------|--------------|--------------|
| CHCl <sub>3</sub>                   |          |              |                  |                   |              |              |
|                                     | <b>7</b> | <b>7-1in</b> | <b>7-2syn-in</b> | <b>7-2anti-in</b> | <b>7-3in</b> | <b>7-4in</b> |
| $\Delta E+ZPE$                      | 0.0      | -0.6         | -0.6             | -0.7              | -0.6         | -0.3         |
| $\Delta H$                          | 0.0      | -0.5         | -0.7             | -0.6              | -0.7         | -0.4         |
| $\Delta G$                          | 0.0      | -1.9         | -0.3             | -2.0              | -0.8         | -0.4         |
| DMSO                                |          |              |                  |                   |              |              |
| $\Delta E+ZPE$                      | 0.0      | -0.1         | 0.2              | 0.2               | 0.5          | 1.0          |
| $\Delta H$                          | 0.0      | 0.0          | 0.1              | 0.2               | 0.4          | 0.9          |
| $\Delta G$                          | 0.0      | -1.4         | 0.5              | -1.2              | 0.3          | 0.9          |

**Table S4.**  $K_{as}$  calculated from the slow exchange (Eq. 1) between  $[n\text{-Bu}_4\text{N}][\text{PF}_6]$  and **7**,  $[n\text{-Bu}_4\text{N}][p\text{TsO}]$  and **6**, and  $[n\text{-Bu}_4\text{N}][\text{MeSO}_3]$  and **8** in  $\text{CDCl}_3$  at 20 °C (Figure S43, S59-S60, and S67).

| No. Eq.                                               | $[n\text{-Bu}_4\text{N}][\text{PF}_6]$ and <b>7</b> |        |        |        |                           | $K_a$ (average, $\text{M}^{-1}$ ) |
|-------------------------------------------------------|-----------------------------------------------------|--------|--------|--------|---------------------------|-----------------------------------|
|                                                       | $I(HG)$                                             | $I(H)$ | $c(H)$ | $c(G)$ | $K_a$ ( $\text{M}^{-1}$ ) |                                   |
| 1.0                                                   | 0.17                                                | 0.38   | 0.0281 | 0.0267 | 1929                      | $1.64(11) \times 10^3$            |
| 1.2                                                   | 0.15                                                | 0.28   | 0.0275 | 0.0327 | 1706                      |                                   |
| 1.5                                                   | 0.14                                                | 0.22   | 0.0270 | 0.0405 | 1496                      |                                   |
| 1.9                                                   | 0.12                                                | 0.15   | 0.0260 | 0.0489 | 1416                      |                                   |
| $[n\text{-Bu}_4\text{N}][p\text{TsO}]$ and <b>6</b>   |                                                     |        |        |        |                           |                                   |
| 0.9                                                   | 0.68                                                | 1.32   | 0.0294 | 0.0259 | 1992                      | $1.88(4) \times 10^3$             |
| 1.2                                                   | 0.30                                                | 0.37   | 0.0285 | 0.0339 | 1873                      |                                   |
| 1.4                                                   | 0.28                                                | 0.27   | 0.0282 | 0.0403 | 1791                      |                                   |
| 1.8                                                   | 0.24                                                | 0.16   | 0.0276 | 0.0491 | 1844                      |                                   |
| $[n\text{-Bu}_4\text{N}][\text{MeSO}_3]$ and <b>8</b> |                                                     |        |        |        |                           |                                   |
| 0.6                                                   | 0.28                                                | 0.56   | 0.0291 | 0.0163 | 3163                      | $2.5(2) \times 10^3$              |
| 1.0                                                   | 1.00                                                | 0.96   | 0.0287 | 0.0287 | 2479                      |                                   |
| 1.7                                                   | 0.19                                                | 0.10   | 0.0285 | 0.0476 | 2138                      |                                   |
| 2.4                                                   | 0.13                                                | 0.04   | 0.0281 | 0.0674 | 2243                      |                                   |

**Table S5.** DFT calculated rotational barriers of biaryl bonds for hosts **1** – **7** at the M062X/6-311++G(3df,2p)+CPCM(solvent)//M062X/6-31+G(d,p) level of theory, where solvent = CHCl<sub>3</sub> or DMSO. Provided in this table are the relative energy ( $\Delta E+ZPE$ ), enthalpy ( $\Delta H$ ), and Gibbs free energy ( $\Delta G$ ) for the rotation of one of the aromatic flanking units around the biaryl bond.

| Rotational barrier in kcal/mol |          |          |          |          |                      |          |                      |          |
|--------------------------------|----------|----------|----------|----------|----------------------|----------|----------------------|----------|
| CHCl <sub>3</sub>              |          |          |          |          |                      |          |                      |          |
|                                | <b>1</b> | <b>2</b> | <b>3</b> | <b>4</b> | <b>5<sup>a</sup></b> | <b>6</b> | <b>7<sup>b</sup></b> | <b>8</b> |
| $\Delta E+ZPE$                 | 11.0     | 10.5     | 10.6     | 10.2     | 20.6                 | 9.5      | 19.9                 | 10.2     |
| $\Delta H$                     | 10.3     | 9.8      | 9.9      | 9.4      | 19.9                 | 8.8      | 19.2                 | 9.5      |
| $\Delta G$                     | 12.6     | 12.5     | 13.1     | 13.1     | 22.7                 | 12.6     | 22.6                 | 12.9     |
| DMSO                           |          |          |          |          |                      |          |                      |          |
| $\Delta E+ZPE$                 | 11.2     | 10.7     | 11.0     | 10.4     | 20.6                 | 9.8      | 20.0                 | 10.4     |
| $\Delta H$                     | 10.5     | 10.0     | 10.2     | 9.6      | 19.9                 | 9.0      | 19.2                 | 9.6      |
| $\Delta G$                     | 12.8     | 12.7     | 13.4     | 13.3     | 22.8                 | 12.8     | 22.6                 | 13.0     |

<sup>a</sup>Data for host **5** was calculated starting from the rotamer **5-4in**. <sup>b</sup>Data for host **7** was calculated starting from the rotamer **7-4in**.

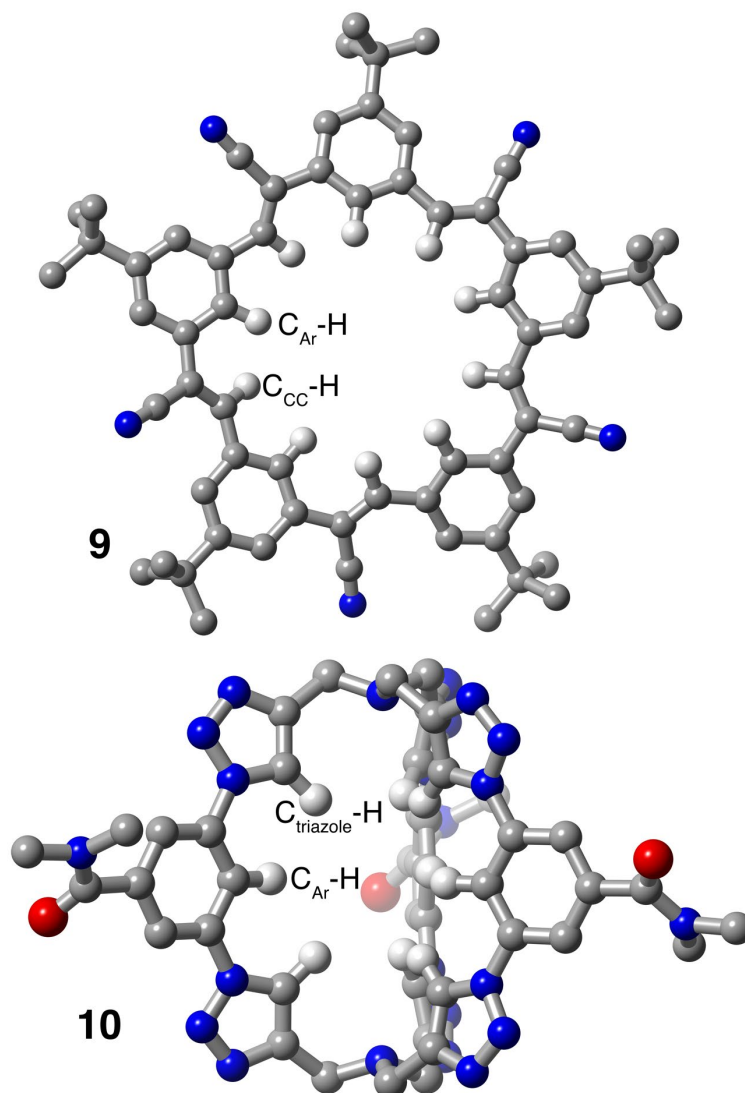

**Figure S72.** DFT optimized molecular structures for **9** and **10** used for the computation of Hirshfeld charges (HCs). Hydrogen atoms are omitted for clarity, except those within the anion binding cavity. Hirshfeld charges for **9**:  $C_{Ar-H} = 0.039$ , and  $C_{CC-H} = 0.049$ . Hirshfeld charges for **10**:  $C_{Ar-H} = 0.042$ , and  $C_{\text{triazole-H}} = 0.053$ . Note: **10** has been optimized [M062X/6-31+G(d,p)] with Cl as reported by Flood et al.,<sup>20</sup> then the Cl anion has been removed and single point calculations been used for the reported charges; this procedure is used to prevent the huge conformational changes upon the optimization.

## Cartesian coordinates of all DFT optimized molecules

|                                              |             |             |            |   |             |             |            |
|----------------------------------------------|-------------|-------------|------------|---|-------------|-------------|------------|
|                                              | <b>1</b>    |             |            | C | 3.95455700  | 4.59768100  | 2.89770000 |
| Zero-point correction=                       |             | 0.947545    |            | C | -0.10964000 | 3.73017600  | 8.17278300 |
| (Hartree/Particle)                           |             |             |            | C | -3.78013000 | 0.16853800  | 8.13793400 |
| Thermal correction to Energy=                |             | 1.000611    |            | C | -0.21965700 | -3.50101100 | 8.25703200 |
| Thermal correction to Enthalpy=              |             | 1.001556    |            | H | 0.08668400  | 5.21357200  | 2.70871900 |
| Thermal correction to Gibbs Free Energy=     |             | 0.860943    |            | H | -3.42909100 | 0.20036400  | 2.96972500 |
| Sum of electronic and zero-point Energies=   |             | -           |            | H | -5.21126800 | 0.18484600  | 2.65633600 |
| 2915.100334                                  |             |             |            | H | -0.20267300 | -3.32129200 | 3.08095900 |
| Sum of electronic and thermal Energies=      |             | -           |            | H | -0.18613600 | -5.11272800 | 2.82531500 |
| 2915.047267                                  |             |             |            | H | 5.11056600  | -0.08779500 | 2.87601800 |
| Sum of electronic and thermal Enthalpies=    |             | -           |            | H | 3.31687100  | -0.09754000 | 3.11516300 |
| 2915.046323                                  |             |             |            | H | 1.36766800  | 1.55818600  | 7.62042900 |
| Sum of electronic and thermal Free Energies= |             | -           |            | H | -0.04037400 | 4.74829900  | 6.29686300 |
| 2915.186935                                  |             |             |            | H | -1.60275200 | 1.62659500  | 7.55774200 |
| O                                            | 1.19044000  | 4.61301200  | 4.27340900 | H | -4.78050300 | 0.17551600  | 6.25127200 |
| O                                            | -1.15664100 | 4.60623200  | 4.15235500 | H | -1.67103800 | -1.34488700 | 7.59189500 |
| O                                            | -4.62610800 | 1.33972000  | 4.18972800 | H | -0.21003500 | -4.56440900 | 6.40522400 |
| O                                            | -4.61889000 | -1.01002800 | 4.14638200 | H | 1.29805700  | -1.41090600 | 7.65389600 |
| O                                            | -1.35490600 | -4.47744900 | 4.32785600 | H | 4.52993700  | 0.00853700  | 6.44894000 |
| O                                            | 0.99533800  | -4.47344400 | 4.30664900 | H | 2.67780700  | 1.64550900  | 1.81682700 |
| O                                            | 4.46215400  | -1.20517100 | 4.41170400 | H | -0.12110000 | 2.73112000  | 8.61634300 |
| O                                            | 4.45660800  | 1.14304700  | 4.30980500 | H | -2.78533500 | 0.17135600  | 8.59107800 |
| C                                            | 2.78950900  | 2.84259100  | 4.25223000 | H | -4.30635300 | -0.71771200 | 8.50242000 |
| C                                            | 1.71258400  | 3.48593300  | 4.87429000 | H | -0.22584000 | -2.49148500 | 8.67632300 |
| C                                            | 0.05650200  | 4.42576600  | 3.46127800 | H | 0.66285300  | -4.01499900 | 8.64713800 |
| C                                            | -1.74072700 | 3.51358400  | 4.75813100 | C | -3.43249300 | -3.24929400 | 2.89641700 |
| C                                            | -2.85574800 | 2.93796400  | 4.13326200 | C | -4.05938500 | -4.49786000 | 2.84009400 |
| C                                            | -3.50474200 | 1.88150400  | 4.78386000 | C | -3.24978800 | -2.53048000 | 1.71146300 |
| C                                            | -4.43110500 | 0.17957700  | 3.41739800 | C | -4.50901400 | -5.00837800 | 1.62526600 |
| C                                            | -3.53234900 | -1.57427700 | 4.78127700 | H | -4.18906000 | -5.06655700 | 3.75595600 |
| C                                            | -2.95171000 | -2.70933600 | 4.19858400 | C | -3.69775800 | -3.04066600 | 0.49393900 |
| C                                            | -1.90168600 | -3.33708500 | 4.87978300 | H | -2.73877400 | -1.57182100 | 1.74095800 |
| C                                            | -0.18721200 | -4.30839200 | 3.56079600 | C | -4.33203700 | -4.28023500 | 0.44895800 |
| C                                            | 1.55467900  | -3.36688400 | 4.91058100 | C | 3.25028100  | -3.33320300 | 3.04188000 |
| C                                            | 2.69596000  | -2.80669300 | 4.32006600 | C | 4.50019800  | -3.95967700 | 3.02218900 |
| C                                            | 3.31684900  | -1.73368500 | 4.97113000 | C | 2.54426100  | -3.19523400 | 1.84325900 |
| C                                            | 4.29935100  | -0.06457700 | 3.60352100 | C | 5.02475100  | -4.45241900 | 1.83031900 |
| C                                            | 3.34488800  | 1.72187300  | 4.88519900 | H | 5.05873800  | -4.05528500 | 3.94843300 |
| C                                            | 1.77024100  | 1.92241000  | 6.68030500 | C | 3.06857500  | -3.68630200 | 0.64858700 |
| C                                            | 1.17847300  | 3.03471200  | 6.08336300 | H | 1.58437300  | -2.68569300 | 1.84358500 |
| C                                            | -0.06374400 | 3.71055000  | 6.64393100 | C | 4.30947400  | -4.31953200 | 0.64037100 |
| C                                            | -1.28831700 | 3.06706200  | 6.00654300 | C | -3.35360600 | 3.43144000  | 2.81909300 |
| C                                            | -1.95815700 | 1.99820400  | 6.60162000 | C | -4.60063000 | 4.05746900  | 2.72879900 |
| C                                            | -3.06487700 | 1.38705300  | 6.01386100 | C | -2.59632700 | 3.26238900  | 1.65630500 |
| C                                            | -3.74604200 | 0.16378700  | 6.60865100 | C | -5.07205300 | 4.51949300  | 1.50286300 |
| C                                            | -3.09699600 | -1.08125300 | 6.01818100 | H | -5.19897000 | 4.17686100  | 3.62699500 |
| C                                            | -2.03398600 | -1.73156900 | 6.64462200 | C | -3.06734500 | 3.72276600  | 0.42764000 |
| C                                            | -1.41831100 | -2.85725800 | 6.09920500 | H | -1.63835500 | 2.75222400  | 1.71145900 |
| C                                            | -0.20100900 | -3.51849200 | 6.72753900 | C | -4.30579100 | 4.35599000  | 0.34906600 |
| C                                            | 1.04966400  | -2.88979500 | 6.12711200 | C | 3.45034300  | 0.06082500  | 8.29072100 |
| C                                            | 1.69396600  | -1.80599000 | 6.72343900 | H | 3.96063900  | -0.81950400 | 8.69042100 |
| C                                            | 2.82520000  | -1.20920500 | 6.16857500 | H | 3.96073900  | 0.95613600  | 8.65558100 |
| C                                            | 3.48126100  | 0.02839700  | 6.76167000 | H | 2.43715600  | 0.06821300  | 8.70109000 |
| C                                            | 2.85821100  | 1.25821800  | 6.11432700 | H | 0.76737200  | 4.25326600  | 8.56312600 |
| C                                            | 3.32435400  | 3.35101800  | 2.95848300 | H | -4.30623600 | 1.05826100  | 8.49397400 |
| C                                            | 3.19031600  | 2.60329900  | 1.78494100 | H | -1.11296000 | -4.01441500 | 8.62253000 |
| C                                            | 3.68888300  | 3.08343900  | 0.57490800 | H | 4.04726200  | 5.18849000  | 3.80399400 |
| C                                            | 4.32581100  | 4.32150200  | 0.52592700 | H | 0.09245700  | 3.42834500  | 3.00437000 |
| C                                            | 4.45480400  | 5.07816600  | 1.69041000 | H | -1.00789900 | 4.25253600  | 8.51262600 |



|   |             |             |             |
|---|-------------|-------------|-------------|
| H | 4.71643900  | 4.69696100  | -0.41461400 |
| H | 4.71917200  | -4.70433900 | -0.28819500 |
| H | -4.68335200 | -4.67898700 | -0.49748500 |
| H | -4.67409400 | 4.71690300  | -0.60607200 |
| H | -2.46728400 | 3.58394200  | -0.46641800 |
| H | 3.57698200  | 2.49082400  | -0.32785200 |
| H | 2.50802400  | -3.57153100 | -0.27407800 |
| H | -3.54860100 | -2.47017800 | -0.41764300 |
| H | 5.99451300  | -4.94024400 | 1.83036600  |
| H | -4.99771400 | -5.97727800 | 1.59677700  |
| H | -6.04018900 | 5.00746500  | 1.44811300  |
| H | 4.94553300  | 6.04593500  | 1.65853700  |

2

Zero-point correction= 0.914762  
(Hartree/Particle)

|                                              |          |
|----------------------------------------------|----------|
| Thermal correction to Energy=                | 0.971125 |
| Thermal correction to Enthalpy=              | 0.972069 |
| Thermal correction to Gibbs Free Energy=     | 0.823262 |
| Sum of electronic and zero-point Energies=   | -        |
| 3311.979731                                  |          |
| Sum of electronic and thermal Energies=      | -        |
| 3311.923369                                  |          |
| Sum of electronic and thermal Enthalpies=    | -        |
| 3311.922425                                  |          |
| Sum of electronic and thermal Free Energies= | -        |
| 3312.071231                                  |          |

|   |             |             |            |
|---|-------------|-------------|------------|
| O | 1.01351600  | 4.60346100  | 4.18641600 |
| O | -1.33856800 | 4.62320700  | 4.21600200 |
| O | -4.61754000 | 1.16222700  | 4.10466100 |
| O | -4.64054400 | -1.18740700 | 4.20967100 |
| O | -1.17879600 | -4.46830000 | 4.23564800 |
| O | 1.16984900  | -4.49011700 | 4.36865400 |
| O | 4.45210300  | -1.02901900 | 4.31720200 |
| O | 4.47126900  | 1.32296000  | 4.37318900 |
| C | 2.71635700  | 2.93773100  | 4.24171400 |
| C | 1.57045600  | 3.50911900  | 4.81476400 |
| C | -0.17393100 | 4.42810600  | 3.45087700 |
| C | -1.89307500 | 3.49697400  | 4.78993900 |
| C | -2.94937300 | 2.86307400  | 4.12265400 |
| C | -3.52910100 | 1.73758500  | 4.72656000 |
| C | -4.43724300 | -0.04822700 | 3.40903900 |
| C | -3.52013900 | -1.72373500 | 4.81163400 |
| C | -2.88040000 | -2.80092300 | 4.18410500 |
| C | -1.76041900 | -3.36074500 | 4.81672400 |
| C | 0.04006700  | -4.31101000 | 3.54910700 |
| C | 1.70136600  | -3.35134800 | 4.93972400 |
| C | 2.78674900  | -2.73352500 | 4.30413700 |
| C | 3.33910300  | -1.59276200 | 4.90549200 |
| C | 4.29951100  | 0.16665300  | 3.58988800 |
| C | 3.32761400  | 1.87267700  | 4.91668300 |
| C | 1.69879100  | 1.98535900  | 6.66050700 |
| C | 1.06044200  | 3.05838500  | 6.03940400 |
| C | -0.18621500 | 3.70636000  | 6.62763500 |
| C | -1.40760100 | 3.03778300  | 6.01585200 |
| C | -2.02659200 | 1.92571600  | 6.58445600 |
| C | -3.09285500 | 1.26764200  | 5.97226300 |
| C | -3.74732700 | 0.04013500  | 6.59247500 |
| C | -3.07270900 | -1.19970700 | 6.02588900 |
| C | -1.96632600 | -1.80027800 | 6.62444700 |
| C | -1.30278300 | -2.88528200 | 6.05266700 |

|   |             |             |            |
|---|-------------|-------------|------------|
| C | -0.08251900 | -3.51989600 | 6.70666200 |
| C | 1.16370400  | -2.86408300 | 6.13238600 |
| C | 1.75797900  | -1.73881000 | 6.70119200 |
| C | 2.84988200  | -1.09473800 | 6.12027100 |
| C | 3.47842900  | 0.14576200  | 6.74125800 |
| C | 2.82902900  | 1.37320900  | 6.12126500 |
| C | 3.29545000  | 3.45087200  | 2.97000300 |
| C | 2.57849700  | 3.39681200  | 1.77130000 |
| C | 3.12385700  | 3.87757300  | 0.58248100 |
| C | 4.40168500  | 4.41156600  | 0.61607700 |
| C | 5.15029600  | 4.47476400  | 1.78174000 |
| C | 4.58819800  | 3.98702700  | 2.95729000 |
| C | -0.20271100 | 3.72244100  | 8.15721500 |
| C | -3.77931200 | 0.07131800  | 8.12155500 |
| C | -0.13017600 | -3.50268600 | 8.23558800 |
| H | -0.16966600 | 5.21388200  | 2.69524200 |
| H | -3.43391800 | -0.08897100 | 2.96488900 |
| H | -5.21644200 | -0.06750100 | 2.64690100 |
| H | 0.08737200  | -3.32215600 | 3.07421300 |
| H | 0.06701400  | -5.11381200 | 2.81208600 |
| H | 5.10815500  | 0.17021900  | 2.85876500 |
| H | 3.31429600  | 0.19733200  | 3.10610300 |
| H | 1.29928300  | 1.61218500  | 7.59835300 |
| H | -0.19032900 | 4.74513000  | 6.28313200 |
| H | -1.66426100 | 1.55689900  | 7.53898700 |
| H | -4.78241100 | 0.02520900  | 6.23735100 |
| H | -1.60686300 | -1.40789900 | 7.57060700 |
| H | -0.06431700 | -4.56587300 | 6.38526400 |
| H | 1.35510400  | -1.34825100 | 7.63047700 |
| H | 4.52761800  | 0.15349200  | 6.43012200 |
| H | 1.58544500  | 2.95767400  | 1.75868100 |
| H | -0.21544100 | 2.72266000  | 8.59897600 |
| H | -2.78418200 | 0.07188100  | 8.57388800 |
| H | -4.31140700 | -0.80601100 | 8.49862500 |
| H | -0.13478100 | -2.49351500 | 8.65566100 |
| H | 0.74261600  | -4.02278500 | 8.63899800 |
| C | -3.40167000 | -3.33706600 | 2.89691200 |
| C | -4.69115800 | -3.87728100 | 2.83426000 |
| C | -2.63109900 | -3.30002500 | 1.73122900 |
| C | -5.19802400 | -4.38535300 | 1.64223700 |
| H | -5.30253400 | -3.89604800 | 3.73085800 |
| C | -3.12055700 | -3.80135500 | 0.52668000 |
| H | -1.63956800 | -2.85798500 | 1.75669000 |
| C | -4.39737200 | -4.33849100 | 0.51081300 |
| C | 3.34008200  | -3.30058800 | 3.04394000 |
| C | 3.87319200  | -4.59466400 | 3.03510400 |
| C | 3.32756000  | -2.57086800 | 1.85181800 |
| C | 4.39775100  | -5.14584300 | 1.87027700 |
| H | 3.87347500  | -5.17448900 | 3.95259800 |
| C | 3.84567600  | -3.10510900 | 0.67370200 |
| H | 2.89174100  | -1.57642500 | 1.83527400 |
| C | 4.37475700  | -4.38487800 | 0.71116700 |
| C | -3.44268700 | 3.39465000  | 2.82256500 |
| C | -3.99355800 | 4.67920300  | 2.75422300 |
| C | -3.35316100 | 2.63814000  | 1.65054400 |
| C | -4.46147000 | 5.19483200  | 1.54952300 |
| H | -4.05256600 | 5.27966200  | 3.65645800 |
| C | -3.81358500 | 3.13662800  | 0.43340700 |
| H | -2.90197300 | 1.65084500  | 1.68190200 |
| C | -4.36328400 | 4.40800700  | 0.41171700 |
| C | 3.44582900  | 0.14671000  | 8.27070700 |
| H | 3.95026600  | -0.74354300 | 8.65549000 |

|   |             |             |             |
|---|-------------|-------------|-------------|
| H | 3.96181600  | 1.03208500  | 8.65134900  |
| H | 2.43248700  | 0.15509900  | 8.68054900  |
| H | 0.68366600  | 4.23900500  | 8.53478900  |
| H | -4.29906600 | 0.96932200  | 8.46584300  |
| H | -1.03225000 | -4.01066800 | 8.58673800  |
| H | 5.15817800  | 4.01901400  | 3.88039400  |
| H | -0.19911100 | 3.42850400  | 2.99719700  |
| H | -1.09183900 | 4.25015300  | 8.51218100  |
| F | 4.88007700  | -4.91161300 | -0.42191900 |
| F | 4.93889400  | 4.88152100  | -0.52724000 |
| F | -4.81349600 | 4.90057900  | -0.75932300 |
| F | -4.88152900 | -4.82770100 | -0.64803300 |
| H | 2.57987200  | 3.84120600  | -0.35468200 |
| H | 6.14824500  | 4.89780600  | 1.75690000  |
| H | 3.84170700  | -2.55110300 | -0.25826700 |
| H | 4.81874300  | -6.14473700 | 1.84877000  |
| H | -2.53447100 | -3.77833500 | -0.38518200 |
| H | -6.19291700 | -4.81154300 | 1.57880100  |
| H | -3.74977200 | 2.56169200  | -0.48361000 |
| H | -4.89543100 | 6.18603400  | 1.48114700  |

3

Zero-point correction= 0.914428  
(Hartree/Particle)

Thermal correction to Energy= 0.970958

Thermal correction to Enthalpy= 0.971902

Thermal correction to Gibbs Free Energy= 0.821206

Sum of electronic and zero-point Energies= -  
3311.980042

Sum of electronic and thermal Energies= -  
3311.923512

Sum of electronic and thermal Enthalpies= -  
3311.922568

Sum of electronic and thermal Free Energies= -  
3312.073264

|   |             |             |            |
|---|-------------|-------------|------------|
| O | 1.18547500  | 4.61319600  | 4.26820700 |
| O | -1.16247100 | 4.60752700  | 4.15335200 |
| O | -4.62069800 | 1.33268600  | 4.17993800 |
| O | -4.61474000 | -1.01768800 | 4.14576800 |
| O | -1.34702200 | -4.47751400 | 4.32553000 |
| O | 1.00338600  | -4.47936300 | 4.31789900 |
| O | 4.45652100  | -1.20127200 | 4.40199800 |
| O | 4.45360500  | 1.14809900  | 4.30768200 |
| C | 2.78351100  | 2.84369300  | 4.25213100 |
| C | 1.70551400  | 3.48691700  | 4.87140500 |
| C | 0.04886200  | 4.43043500  | 3.45853700 |
| C | -1.74244600 | 3.51279800  | 4.75842900 |
| C | -2.85361200 | 2.93244200  | 4.13248200 |
| C | -3.50191700 | 1.87351700  | 4.77869000 |
| C | -4.42833300 | 0.16899900  | 3.41196900 |
| C | -3.52737600 | -1.57764000 | 4.78216100 |
| C | -2.94170500 | -2.70972800 | 4.20041800 |
| C | -1.89079100 | -3.33724600 | 4.87935300 |
| C | -0.17430400 | -4.31716500 | 3.56397500 |
| C | 1.55810900  | -3.36953500 | 4.91902500 |
| C | 2.69376300  | -2.80407300 | 4.32501600 |
| C | 3.31433000  | -1.72750100 | 4.96867900 |
| C | 4.29547400  | -0.05738600 | 3.59805100 |
| C | 3.34202400  | 1.72482700  | 4.88440800 |
| C | 1.76838000  | 1.92594200  | 6.67958400 |
| C | 1.17383600  | 3.03654700  | 6.08198400 |

|   |             |             |            |
|---|-------------|-------------|------------|
| C | -0.06766800 | 3.71198000  | 6.64465700 |
| C | -1.29116100 | 3.06692600  | 6.00713500 |
| C | -1.96057100 | 1.99686700  | 6.60060000 |
| C | -3.06443400 | 1.38214500  | 6.01090400 |
| C | -3.74567400 | 0.15992500  | 6.60778600 |
| C | -3.09427000 | -1.08463300 | 6.01942700 |
| C | -2.03117100 | -1.73445000 | 6.64633500 |
| C | -1.41186000 | -2.85845400 | 6.10121600 |
| C | -0.19683400 | -3.51931800 | 6.73455400 |
| C | 1.05391800  | -2.89076000 | 6.13473300 |
| C | 1.69767600  | -1.80425600 | 6.72693400 |
| C | 2.82569100  | -1.20445900 | 6.16821800 |
| C | 3.48204200  | 0.03318400  | 6.76085100 |
| C | 2.85668800  | 1.26189200  | 6.11396100 |
| C | 3.31992900  | 3.35053400  | 2.95823000 |
| C | 3.16411400  | 2.61361300  | 1.77978000 |
| C | 3.66723700  | 3.09394800  | 0.57159400 |
| C | 4.33030900  | 4.31739900  | 0.51925000 |
| C | 4.46458100  | 5.03451400  | 1.69894000 |
| C | 3.97435600  | 4.58399800  | 2.91352500 |
| C | -0.11249200 | 3.73078400  | 8.17345200 |
| C | -3.78122400 | 0.16717300  | 8.13693800 |
| C | -0.21862200 | -3.49876600 | 8.26384500 |
| H | 0.07765800  | 5.22267100  | 2.71077000 |
| H | -3.42754100 | 0.18670400  | 2.96109200 |
| H | -5.21114900 | 0.17227200  | 2.65381500 |
| H | -0.18312500 | -3.33406400 | 3.07547800 |
| H | -0.17193200 | -5.12795500 | 2.83589200 |
| H | 5.10747800  | -0.07971500 | 2.87157000 |
| H | 3.31311500  | -0.08696100 | 3.10890400 |
| H | 1.36816000  | 1.56344800  | 7.62135100 |
| H | -0.04529200 | 4.74988500  | 6.29790800 |
| H | -1.60767500 | 1.62756700  | 7.55850800 |
| H | -4.77978200 | 0.17019300  | 6.24921700 |
| H | -1.67170700 | -1.34939100 | 7.59555700 |
| H | -0.20520100 | -4.56582300 | 6.41398500 |
| H | 1.30426700  | -1.40955100 | 7.65860100 |
| H | 4.53028000  | 0.01403400  | 6.44644600 |
| H | 2.63372500  | 1.66647600  | 1.80784600 |
| H | -0.12425000 | 2.73159400  | 8.61667200 |
| H | -2.78696200 | 0.16992400  | 8.59122300 |
| H | -4.30860300 | -0.71802200 | 8.50206200 |
| H | -0.22285900 | -2.48847400 | 8.68129200 |
| H | 0.66168800  | -4.01444200 | 8.65644100 |
| C | -3.42181300 | -3.24626500 | 2.89633400 |
| C | -4.08796200 | -4.47340600 | 2.85314700 |
| C | -3.20079300 | -2.54325600 | 1.70770500 |
| C | -4.52435200 | -4.95174200 | 1.62868100 |
| H | -4.26357400 | -5.05166700 | 3.75372100 |
| C | -3.65111700 | -3.05094500 | 0.48984300 |
| H | -2.66116800 | -1.60129400 | 1.73641700 |
| C | -4.32517400 | -4.26842000 | 0.43820900 |
| C | 3.23982700  | -3.33175500 | 3.04338200 |
| C | 4.45326100  | -4.02355400 | 3.03798200 |
| C | 2.55830400  | -3.13123900 | 1.83874100 |
| C | 4.94017600  | -4.50475100 | 1.83380500 |
| H | 5.01432100  | -4.18503100 | 3.95199800 |
| C | 3.07419900  | -3.62683900 | 0.64201900 |
| H | 1.62669000  | -2.57302400 | 1.83828700 |
| C | 4.27821900  | -4.32635200 | 0.62803400 |
| C | -3.34782100 | 3.42680500  | 2.81704700 |
| C | -4.57880500 | 4.08296300  | 2.74036900 |

|   |             |             |             |
|---|-------------|-------------|-------------|
| C | -2.60181600 | 3.22951500  | 1.65065700  |
| C | -5.01798100 | 4.53343200  | 1.50640200  |
| H | -5.18981900 | 4.24015400  | 3.62253300  |
| C | -3.07067600 | 3.69357100  | 0.42241200  |
| H | -1.65678500 | 2.69728900  | 1.70421300  |
| C | -4.29164400 | 4.35795000  | 0.33786400  |
| C | 3.45343600  | 0.06582800  | 8.28987000  |
| H | 3.96393900  | -0.81455700 | 8.68894300  |
| H | 3.96528000  | 0.96066900  | 8.65359000  |
| H | 2.44095600  | 0.07415400  | 8.70192500  |
| H | 0.76476000  | 4.25351400  | 8.56349300  |
| H | -4.30735800 | 1.05752500  | 8.49109100  |
| H | -1.11364800 | -4.00944000 | 8.62869600  |
| H | 4.09985300  | 5.18817000  | 3.80543400  |
| H | 0.08277600  | 3.43538100  | 2.99606400  |
| H | -1.01011600 | 4.25362600  | 8.51395200  |
| F | 6.10899500  | -5.17501400 | 1.83421800  |
| F | -5.17005600 | -6.13387800 | 1.59284300  |
| F | -6.20402800 | 5.16940500  | 1.43854200  |
| F | 5.09895000  | 6.22276300  | 1.66204700  |
| H | 4.73446100  | 4.71849000  | -0.40317200 |
| H | 4.70573100  | -4.72572400 | -0.28455000 |
| H | -4.68926400 | -4.69016600 | -0.49165800 |
| H | -4.68385800 | 4.73223300  | -0.60084700 |
| H | -2.48274100 | 3.53597800  | -0.47605600 |
| H | 3.54150300  | 2.51308100  | -0.33644900 |
| H | 2.53645200  | -3.46688900 | -0.28695700 |
| H | -3.47524300 | -2.49630000 | -0.42622400 |

4

|                                              |             |             |            |
|----------------------------------------------|-------------|-------------|------------|
| Zero-point correction=                       | 0.881336    |             |            |
| (Hartree/Particle)                           |             |             |            |
| Thermal correction to Energy=                | 0.941424    |             |            |
| Thermal correction to Enthalpy=              | 0.942368    |             |            |
| Thermal correction to Gibbs Free Energy=     | 0.782132    |             |            |
| Sum of electronic and zero-point Energies=   | -           |             |            |
| 3708.854771                                  |             |             |            |
| Sum of electronic and thermal Energies=      | -           |             |            |
| 3708.794684                                  |             |             |            |
| Sum of electronic and thermal Enthalpies=    | -           |             |            |
| 3708.793740                                  |             |             |            |
| Sum of electronic and thermal Free Energies= | -           |             |            |
| 3708.953975                                  |             |             |            |
| O                                            | 1.07093500  | 4.59443000  | 4.20574200 |
| O                                            | -1.27906600 | 4.61348200  | 4.19256700 |
| O                                            | -4.60976400 | 1.21750300  | 4.13047400 |
| O                                            | -4.62939600 | -1.13157500 | 4.19658000 |
| O                                            | -1.23377100 | -4.46253600 | 4.27371500 |
| O                                            | 1.11491600  | -4.48066900 | 4.36004000 |
| O                                            | 4.44772200  | -1.08589600 | 4.35097800 |
| O                                            | 4.46519800  | 1.26430700  | 4.35637500 |
| C                                            | 2.72828100  | 2.88935800  | 4.25299800 |
| C                                            | 1.60775900  | 3.49233200  | 4.83583700 |
| C                                            | -0.10142700 | 4.42243100  | 3.44534700 |
| C                                            | -1.83646100 | 3.50108100  | 4.78636600 |
| C                                            | -2.90360200 | 2.87427300  | 4.13491300 |
| C                                            | -3.51239100 | 1.77489600  | 4.75081200 |
| C                                            | -4.43229500 | 0.02016200  | 3.41144300 |
| C                                            | -3.52190000 | -1.66860600 | 4.81774600 |
| C                                            | -2.89040700 | -2.75726000 | 4.20765600 |
| C                                            | -1.79592800 | -3.34492100 | 4.85218900 |

|   |             |             |            |
|---|-------------|-------------|------------|
| C | -0.03026800 | -4.30965200 | 3.55928000 |
| C | 1.64765600  | -3.35327600 | 4.94822800 |
| C | 2.74237300  | -2.74353100 | 4.32694300 |
| C | 3.32515700  | -1.62801900 | 4.93899900 |
| C | 4.30058900  | 0.09219900  | 3.59416000 |
| C | 3.33305200  | 1.81682300  | 4.91650700 |
| C | 1.72709000  | 1.97150300  | 6.68085700 |
| C | 1.09787600  | 3.05228300  | 6.06289700 |
| C | -0.14483100 | 3.71397100  | 6.64262700 |
| C | -1.36751600 | 3.05247200  | 6.02430100 |
| C | -2.00696600 | 1.95661800  | 6.60337400 |
| C | -3.08287200 | 1.30698400  | 5.99815500 |
| C | -3.74935400 | 0.08446200  | 6.61405400 |
| C | -3.08280900 | -1.15822100 | 6.04262400 |
| C | -1.99150900 | -1.77769200 | 6.65131000 |
| C | -1.33768800 | -2.87353400 | 6.08795100 |
| C | -0.12076000 | -3.51890600 | 6.73633600 |
| C | 1.12691800  | -2.87256200 | 6.15295200 |
| C | 1.74159200  | -1.76126800 | 6.72947400 |
| C | 2.84308900  | -1.12762700 | 6.15409700 |
| C | 3.48362200  | 0.11064600  | 6.76583400 |
| C | 2.84273500  | 1.33759500  | 6.13452000 |
| C | 3.27571600  | 3.38038600  | 2.95695300 |
| C | 2.63714700  | 3.05287200  | 1.75773600 |
| C | 3.16992400  | 3.52560600  | 0.56693000 |
| C | 4.31158900  | 4.30836000  | 0.50956700 |
| C | 4.91767200  | 4.60552400  | 1.72192800 |
| C | 4.43252600  | 4.16220900  | 2.94207200 |
| C | -0.16961600 | 3.73605500  | 8.17174700 |
| C | -3.78402900 | 0.11133200  | 8.14289000 |
| C | -0.16040400 | -3.50100500 | 8.26522300 |
| H | -0.08750900 | 5.21400600  | 2.69687800 |
| H | -3.43357900 | -0.00581200 | 2.95575800 |
| H | -5.21816500 | 0.00873300  | 2.65695300 |
| H | -0.00001400 | -3.32689100 | 3.07039900 |
| H | -0.01299300 | -5.12051700 | 2.83185000 |
| H | 5.11728300  | 0.08462900  | 2.87311900 |
| H | 3.32175900  | 0.10537600  | 3.09669500 |
| H | 1.33184100  | 1.60906400  | 7.62476400 |
| H | -0.13857300 | 4.75118500  | 6.29273800 |
| H | -1.65265000 | 1.59387900  | 7.56328800 |
| H | -4.78362800 | 0.07857700  | 6.25554400 |
| H | -1.63617400 | -1.39097800 | 7.60143300 |
| H | -0.11242500 | -4.56490600 | 6.41376400 |
| H | 1.34662400  | -1.37336900 | 7.66333700 |
| H | 4.53234600  | 0.10762500  | 6.45217200 |
| H | 1.74727500  | 2.43282400  | 1.73715200 |
| H | -0.18396500 | 2.73779700  | 8.61696500 |
| H | -2.78947900 | 0.11151700  | 8.59656100 |
| H | -4.31686100 | -0.76649400 | 8.51756100 |
| H | -0.16412000 | -2.49142700 | 8.68440000 |
| H | 0.71408900  | -4.02062100 | 8.66537600 |
| C | -3.38194100 | -3.28097200 | 2.90198100 |
| C | -4.53242100 | -4.07091900 | 2.85768500 |
| C | -2.69684500 | -2.97577600 | 1.72275000 |
| C | -4.96472300 | -4.54443100 | 1.62903700 |
| H | -5.08560200 | -4.31327900 | 3.75762200 |
| C | -3.17788800 | -3.47824600 | 0.52209700 |
| H | -1.81034300 | -2.35055200 | 1.72471600 |
| C | -4.31158900 | -4.26989300 | 0.43594600 |
| C | 3.27724400  | -3.27929900 | 3.04342200 |
| C | 4.07062800  | -4.42826100 | 3.04555800 |

|   |             |             |             |
|---|-------------|-------------|-------------|
| C | 2.97926600  | -2.63686700 | 1.83861500  |
| C | 4.55463000  | -4.90203100 | 1.83642000  |
| H | 4.30784200  | -4.94864000 | 3.96620600  |
| C | 3.49213000  | -3.15825400 | 0.65940600  |
| H | 2.35199600  | -1.75245100 | 1.80482500  |
| C | 4.28739300  | -4.29198100 | 0.61910000  |
| C | -3.38208900 | 3.37571900  | 2.81570400  |
| C | -4.16844900 | 4.52777700  | 2.75249500  |
| C | -3.03749500 | 2.69857800  | 1.64268900  |
| C | -4.59891700 | 4.96954400  | 1.51143100  |
| H | -4.44057500 | 5.07505800  | 3.64752800  |
| C | -3.49789800 | 3.18886600  | 0.42897000  |
| H | -2.41362600 | 1.81129200  | 1.65957300  |
| C | -4.28457500 | 4.32439900  | 0.32378900  |
| C | 3.45260700  | 0.12357800  | 8.29498200  |
| H | 3.95769400  | -0.76373900 | 8.68544200  |
| H | 3.96875600  | 1.01150400  | 8.66922200  |
| H | 2.43947000  | 0.13398700  | 8.70537100  |
| H | 0.71501100  | 4.25399900  | 8.55131600  |
| H | -4.30439800 | 1.00857600  | 8.48799700  |
| H | -1.06066600 | -4.00916300 | 8.62051300  |
| H | 4.95039300  | 4.42126000  | 3.85824700  |
| H | -0.11186900 | 3.42720800  | 2.98148400  |
| H | -1.06005900 | 4.26532400  | 8.52085200  |
| F | 5.32075300  | -6.00622400 | 1.83573100  |
| F | 3.20346600  | -2.53803500 | -0.49811000 |
| F | -2.51664600 | -3.18266800 | -0.61069300 |
| F | -6.07035900 | -5.30710900 | 1.58381600  |
| F | -3.16448400 | 2.53510900  | -0.69768300 |
| F | -5.35789100 | 6.07681600  | 1.44793600  |
| F | 2.55317000  | 3.20884300  | -0.58512500 |
| F | 6.02946200  | 5.36038400  | 1.70494300  |
| H | 4.71108000  | 4.66689500  | -0.43088100 |
| H | 4.67746000  | -4.68265700 | -0.31245300 |
| H | -4.67036100 | -4.65174600 | -0.51171700 |
| H | -4.63327300 | 4.69046800  | -0.63381000 |

6

|                                              |             |             |            |
|----------------------------------------------|-------------|-------------|------------|
| Zero-point correction=                       |             |             | 0.849572   |
| (Hartree/Particle)                           |             |             |            |
| Thermal correction to Energy=                |             | 0.913411    |            |
| Thermal correction to Enthalpy=              |             | 0.914356    |            |
| Thermal correction to Gibbs Free Energy=     |             | 0.746236    |            |
| Sum of electronic and zero-point Energies=   |             |             | -          |
| 4105.672526                                  |             |             |            |
| Sum of electronic and thermal Energies=      |             |             | -          |
| 4105.608687                                  |             |             |            |
| Sum of electronic and thermal Enthalpies=    |             |             | -          |
| 4105.607743                                  |             |             |            |
| Sum of electronic and thermal Free Energies= |             |             | -          |
| 4105.775862                                  |             |             |            |
| O                                            | 1.05214600  | 4.60872200  | 4.19838000 |
| O                                            | -1.29955300 | 4.62976900  | 4.20580100 |
| O                                            | -4.60278400 | 1.19951800  | 4.10832300 |
| O                                            | -4.63377300 | -1.15126500 | 4.19831100 |
| O                                            | -1.21237300 | -4.46546200 | 4.25148400 |
| O                                            | 1.13758500  | -4.49456600 | 4.36456800 |
| O                                            | 4.44219200  | -1.06240700 | 4.31304400 |
| O                                            | 4.46477600  | 1.29069300  | 4.34376000 |
| C                                            | 2.72384400  | 2.91561400  | 4.24143700 |
| C                                            | 1.59471600  | 3.50627500  | 4.82308600 |

|   |             |             |            |
|---|-------------|-------------|------------|
| C | -0.12778800 | 4.44361700  | 3.44834200 |
| C | -1.85365500 | 3.50824400  | 4.78646400 |
| C | -2.91557800 | 2.87874600  | 4.12626100 |
| C | -3.50977200 | 1.76305200  | 4.73116600 |
| C | -4.43019600 | -0.00720800 | 3.40397300 |
| C | -3.52142100 | -1.68984900 | 4.81052600 |
| C | -2.88839800 | -2.77565700 | 4.19401400 |
| C | -1.77963600 | -3.35017300 | 4.82989600 |
| C | 0.00109800  | -4.32033700 | 3.55249400 |
| C | 1.67118400  | -3.35999100 | 4.93932300 |
| C | 2.76082000  | -2.74825100 | 4.30788600 |
| C | 3.32740500  | -1.61476400 | 4.90654100 |
| C | 4.29104800  | 0.12594400  | 3.57299100 |
| C | 3.33153400  | 1.84271700  | 4.90330100 |
| C | 1.72036300  | 1.97836400  | 6.66313900 |
| C | 1.08688200  | 3.05843400  | 6.04870400 |
| C | -0.15586200 | 3.71361600  | 6.63600900 |
| C | -1.37751500 | 3.05104900  | 6.01757500 |
| C | -2.00824800 | 1.94644000  | 6.58849900 |
| C | -3.07867000 | 1.29332400  | 5.97792200 |
| C | -3.74306200 | 0.07093900  | 6.59679700 |
| C | -3.07539300 | -1.17194000 | 6.02851100 |
| C | -1.97726600 | -1.78380900 | 6.63160000 |
| C | -1.32048500 | -2.87581200 | 6.06495000 |
| C | -0.10400600 | -3.51794300 | 6.71785800 |
| C | 1.14328800  | -2.87053500 | 6.13612300 |
| C | 1.74972100  | -1.75096900 | 6.70415400 |
| C | 2.84496400  | -1.11342900 | 6.12181800 |
| C | 3.48459500  | 0.12380700  | 6.73719600 |
| C | 2.83978400  | 1.35286600  | 6.11547900 |
| C | 3.28380200  | 3.42215700  | 2.95767200 |
| C | 2.60885300  | 3.20002500  | 1.75476100 |
| C | 3.14480200  | 3.68193600  | 0.57027600 |
| C | 4.34390300  | 4.38058200  | 0.55420100 |
| C | 5.00809700  | 4.58625100  | 1.75810100 |
| C | 4.49646700  | 4.11569800  | 2.95550800 |
| C | -0.17641500 | 3.72700200  | 8.16534000 |
| C | -3.77688300 | 0.10084000  | 8.12571600 |
| C | -0.14672100 | -3.49634500 | 8.24669500 |
| H | -0.11799300 | 5.24044700  | 2.70514600 |
| H | -3.42950400 | -0.04667000 | 2.95335900 |
| H | -5.21394700 | -0.02021500 | 2.64690400 |
| H | 0.04584200  | -3.33746100 | 3.06475500 |
| H | 0.02021300  | -5.13218400 | 2.82580300 |
| H | 5.09994800  | 0.12228000  | 2.84271900 |
| H | 3.30590400  | 0.15047600  | 3.08823800 |
| H | 1.32590100  | 1.61020200  | 7.60511400 |
| H | -0.15363800 | 4.75284000  | 6.29248800 |
| H | -1.65269700 | 1.58041300  | 7.54661500 |
| H | -4.77769600 | 0.06327000  | 6.23977600 |
| H | -1.61945400 | -1.39501800 | 7.57986100 |
| H | -0.09352900 | -4.56478800 | 6.39862500 |
| H | 1.35413700  | -1.36001200 | 7.63640500 |
| H | 4.53239700  | 0.12414600  | 6.42084100 |
| H | 1.67763400  | 2.64502500  | 1.71739000 |
| H | -0.18989700 | 2.72648800  | 8.60541800 |
| H | -2.78243300 | 0.09764000  | 8.57950800 |
| H | -4.31306700 | -0.77437800 | 8.50154600 |
| H | -0.14715200 | -2.48608700 | 8.66415200 |
| H | 0.72520500  | -4.01844500 | 8.64906200 |
| C | -3.40421000 | -3.31277400 | 2.90445600 |
| C | -4.64665700 | -3.95106600 | 2.86725400 |

|   |             |             |             |   |             |             |            |
|---|-------------|-------------|-------------|---|-------------|-------------|------------|
| C | -2.66059100 | -3.17438300 | 1.72970500  | O | -4.65993600 | 0.91608500  | 4.06359400 |
| C | -5.11850900 | -4.45137200 | 1.66572300  | O | -4.57310300 | -1.43287500 | 4.17967000 |
| H | -5.25151100 | -4.06052600 | 3.76024700  | O | -0.95152000 | -4.53075200 | 4.20878900 |
| C | -3.15786500 | -3.68407100 | 0.54021700  | O | 1.39650400  | -4.44247500 | 4.34478800 |
| H | -1.70482600 | -2.66204500 | 1.71649600  | O | 4.49766000  | -0.82432500 | 4.28132500 |
| C | -4.38572600 | -4.32909000 | 0.49052700  | O | 4.40628000  | -1.52693700 | 4.33305500 |
| C | 3.31251100  | -3.31463000 | 3.04610400  | C | 2.57207700  | 3.04667300  | 4.20406300 |
| C | 3.93634800  | -4.56499800 | 3.06534100  | C | 1.39734600  | 3.56364900  | 4.76949100 |
| C | 3.20437000  | -2.61277400 | 1.84284800  | C | -0.39061800 | 4.39333800  | 3.39895500 |
| C | 4.45256300  | -5.08600900 | 1.89127200  | C | -2.05744900 | 3.38752200  | 4.74978900 |
| H | 4.02265000  | -5.13813800 | 3.98148900  | C | -3.08087600 | 2.69822600  | 4.08777300 |
| C | 3.72935900  | -3.15891600 | 0.68181200  | C | -3.60400000 | 1.54406600  | 4.68885400 |
| H | 2.70414100  | -1.65231900 | 1.78514200  | C | -4.42456200 | -0.28874600 | 3.37295200 |
| C | 4.36028700  | -4.39509400 | 0.68839500  | C | -3.42951000 | -1.90827700 | 4.78753200 |
| C | -3.40802500 | 3.40548800  | 2.82334600  | C | -2.73426400 | -2.95248200 | 4.16516400 |
| C | -4.04580900 | 4.64780900  | 2.77444500  | C | -1.58500300 | -3.45479900 | 4.79306800 |
| C | -3.22796100 | 2.67210600  | 1.64781700  | C | 0.26036400  | -4.31910600 | 3.52275900 |
| C | -4.50421000 | 5.12962800  | 1.56019600  | C | 1.86760100  | -3.27974400 | 4.91876800 |
| H | -4.18688500 | 5.24505800  | 3.66811600  | C | 2.91905300  | -2.60731900 | 4.28379400 |
| C | -3.69631000 | 3.17915400  | 0.44553300  | C | 3.41614300  | -1.43758800 | 4.87674500 |
| H | -2.71440900 | 1.71690300  | 1.64436000  | C | 4.29130000  | 0.36215100  | 3.55069800 |
| C | -4.34034800 | 4.40698900  | 0.38380000  | C | 3.23867400  | 2.01735700  | 4.88031400 |
| C | 3.45894600  | 0.12880300  | 8.26662700  | C | 1.60625400  | 2.05886700  | 6.62288900 |
| H | 3.96330700  | -0.76154700 | 8.65094200  | C | 0.91298300  | 3.09512100  | 5.99758800 |
| H | 3.97909600  | 1.01344400  | 8.64294200  | C | -0.36254100 | 3.68458300  | 6.58535000 |
| H | 2.44755900  | 0.14028400  | 8.68117000  | C | -1.54957600 | 2.95499000  | 5.97581400 |
| H | 4.70899000  | 4.24304300  | 8.54555300  | C | -2.11499500 | 1.81561200  | 6.54678200 |
| H | -4.29405800 | 1.00030600  | 8.46970100  | C | -3.14644900 | 1.10184500  | 5.93679300 |
| H | -1.04912300 | -4.00081300 | 8.60167300  | C | -3.74148000 | -0.15280000 | 6.56274400 |
| H | 5.04757900  | 4.29154600  | 3.87236200  | C | -3.00732300 | -1.35974100 | 5.99947500 |
| H | -0.14591500 | 3.45098000  | 2.97891700  | C | -1.87279600 | -1.90538700 | 6.59846100 |
| H | -1.06583900 | 4.25454800  | 8.51944800  | C | -1.15377100 | -2.95614500 | 6.02905600 |
| F | 4.86154100  | -4.91011100 | -0.43255300 | C | 0.09469700  | -3.53042700 | 6.68600600 |
| F | 4.84946600  | 4.83976100  | -0.58885900 | C | 1.30757500  | -2.81614100 | 6.11014000 |
| F | -4.78660100 | 4.88478100  | -0.77620200 | C | 1.84852900  | -1.66221000 | 6.67544800 |
| F | -4.85410300 | -4.81528500 | -0.65719800 | C | 2.90553500  | -0.96376100 | 6.09209000 |
| F | 5.05784000  | -6.27769700 | 1.88667300  | C | 3.47385700  | 0.30684600  | 6.71046400 |
| F | 3.63304300  | -2.50032000 | -0.47830200 | C | 2.76480500  | 1.49873400  | 6.08637500 |
| F | -2.45897400 | -3.55847800 | -0.59317900 | C | 3.12086000  | 3.58163200  | 2.92936500 |
| F | -6.30206300 | -5.06952900 | 1.60675600  | C | 2.38946300  | 3.51084400  | 1.74733200 |
| F | -3.53046400 | 2.49004700  | -0.68866200 | C | 2.90675300  | 4.03089500  | 0.56062500 |
| F | -5.12096500 | 6.31331500  | 1.48974000  | C | 4.16189200  | 4.61860700  | 0.52864400 |
| F | 2.51256500  | 3.47695300  | -0.59018400 | C | 4.90005200  | 4.67370000  | 1.71211600 |
| F | 6.16430300  | 5.25593200  | 1.73128800  | C | 4.39547200  | 4.16236000  | 2.89987300 |

### 8

|                                              |             |            |             |
|----------------------------------------------|-------------|------------|-------------|
| Zero-point correction=                       |             |            | 0.986861    |
| (Hartree/Particle)                           |             |            |             |
| Thermal correction to Energy=                |             | 1.069577   |             |
| Thermal correction to Enthalpy=              |             | 1.070521   |             |
| Thermal correction to Gibbs Free Energy=     |             | 0.850042   |             |
| Sum of electronic and zero-point Energies=   |             | -          | 5610.694871 |
| Sum of electronic and thermal Energies=      |             | -          | 5610.612155 |
| Sum of electronic and thermal Enthalpies=    |             | -          | 5610.611211 |
| Sum of electronic and thermal Free Energies= |             | -          | 5610.831689 |
| O                                            | 0.78983700  | 4.62422700 | 4.13196400  |
| O                                            | -1.56186000 | 4.53556800 | 4.16697300  |

|   |             |             |            |
|---|-------------|-------------|------------|
| O | -4.65993600 | 0.91608500  | 4.06359400 |
| O | -4.57310300 | -1.43287500 | 4.17967000 |
| O | -0.95152000 | -4.53075200 | 4.20878900 |
| O | 1.39650400  | -4.44247500 | 4.34478800 |
| O | 4.49766000  | -0.82432500 | 4.28132500 |
| O | 4.40628000  | -1.52693700 | 4.33305500 |
| C | 2.57207700  | 3.04667300  | 4.20406300 |
| C | 1.39734600  | 3.56364900  | 4.76949100 |
| C | -0.39061800 | 4.39333800  | 3.39895500 |
| C | -2.05744900 | 3.38752200  | 4.74978900 |
| C | -3.08087600 | 2.69822600  | 4.08777300 |
| C | -3.60400000 | 1.54406600  | 4.68885400 |
| C | -4.42456200 | -0.28874600 | 3.37295200 |
| C | -3.42951000 | -1.90827700 | 4.78753200 |
| C | -2.73426400 | -2.95248200 | 4.16516400 |
| C | -1.58500300 | -3.45479900 | 4.79306800 |
| C | 0.26036400  | -4.31910600 | 3.52275900 |
| C | 1.86760100  | -3.27974400 | 4.91876800 |
| C | 2.91905300  | -2.60731900 | 4.28379400 |
| C | 3.41614300  | -1.43758800 | 4.87674500 |
| C | 4.29130000  | 0.36215100  | 3.55069800 |
| C | 3.23867400  | 2.01735700  | 4.88031400 |
| C | 1.60625400  | 2.05886700  | 6.62288900 |
| C | 0.91298300  | 3.09512100  | 5.99758800 |
| C | -0.36254100 | 3.68458300  | 6.58535000 |
| C | -1.54957600 | 2.95499000  | 5.97581400 |
| C | -2.11499500 | 1.81561200  | 6.54678200 |
| C | -3.14644900 | 1.10184500  | 5.93679300 |
| C | -3.74148000 | -0.15280000 | 6.56274400 |
| C | -3.00732300 | -1.35974100 | 5.99947500 |
| C | -1.87279600 | -1.90538700 | 6.59846100 |
| C | -1.15377100 | -2.95614500 | 6.02905600 |
| C | 0.09469700  | -3.53042700 | 6.68600600 |
| C | 1.30757500  | -2.81614100 | 6.11014000 |
| C | 1.84852900  | -1.66221000 | 6.67544800 |
| C | 2.90553500  | -0.96376100 | 6.09209000 |
| C | 3.47385700  | 0.30684600  | 6.71046400 |
| C | 2.76480500  | 1.49873400  | 6.08637500 |
| C | 3.12086000  | 3.58163200  | 2.92936500 |
| C | 2.38946300  | 3.51084400  | 1.74733200 |
| C | 2.90675300  | 4.03089500  | 0.56062500 |
| C | 4.16189200  | 4.61860700  | 0.52864400 |
| C | 4.90005200  | 4.67370000  | 1.71211600 |
| C | 4.39547200  | 4.16236000  | 2.89987300 |
| C | -0.37918500 | 3.70483800  | 8.11477200 |
| C | -3.77393800 | -0.11755000 | 8.09162500 |
| C | 0.04519100  | -3.51218900 | 8.21473500 |
| H | -0.42335100 | 5.17616200  | 2.64105800 |
| H | -3.42017300 | -0.28632200 | 2.92895600 |
| H | -5.20185800 | -0.34705700 | 2.61092900 |
| H | 0.26355300  | -3.32970200 | 3.04630000 |
| H | 0.32481900  | -5.12080200 | 2.78695100 |
| H | 5.09971200  | 0.40153700  | 2.82049200 |
| H | 3.30627400  | 0.34708900  | 3.06543800 |
| H | 1.22849000  | 1.67330900  | 7.56470400 |
| H | -0.41718300 | 4.72077600  | 6.23718100 |
| H | -1.73742200 | 1.47010900  | 7.50410100 |
| H | -4.77481300 | -0.21892300 | 6.20818900 |
| H | -1.53549900 | -1.49618800 | 7.54561900 |
| H | 0.16333600  | -4.57501700 | 6.36652800 |
| H | 1.43033200  | -1.29234100 | 7.60639000 |
| H | 4.52133400  | 0.36471900  | 6.39843600 |

|   |             |             |             |
|---|-------------|-------------|-------------|
| H | 1.41305400  | 3.03568700  | 1.73824100  |
| H | -0.34429600 | 2.70715900  | 8.56006900  |
| H | -2.77978100 | -0.06776000 | 8.54337900  |
| H | -4.26360300 | -1.01766000 | 8.47199700  |
| H | -0.00791400 | -2.50359300 | 8.63285600  |
| H | 0.94125300  | -3.98956500 | 8.61950500  |
| C | -3.22584300 | -3.51665500 | 2.87974200  |
| C | -4.49854400 | -4.09717000 | 2.80442700  |
| C | -2.44040800 | -3.47359600 | 1.73141000  |
| C | -4.94816700 | -4.63565900 | 1.60649300  |
| H | -5.12883000 | -4.12877700 | 3.68683300  |
| C | -2.90240800 | -4.02121100 | 0.53449400  |
| H | -1.46400600 | -2.99908800 | 1.75652700  |
| C | -4.15564700 | -4.60888800 | 0.45773100  |
| C | 3.49732900  | -3.14400300 | 3.02290100  |
| C | 4.08460200  | -4.41629700 | 3.00244700  |
| C | 3.46187800  | -2.40331700 | 1.84555900  |
| C | 4.63634100  | -4.90854500 | 1.82826200  |
| H | 4.10936500  | -5.01250800 | 3.90825400  |
| C | 4.02270000  | -2.90866400 | 0.67187500  |
| H | 2.98269500  | -1.42895400 | 1.82882200  |
| C | 4.61667300  | -4.16052900 | 0.64934800  |
| C | -3.60312500 | 3.20096600  | 2.78898700  |
| C | -4.18897000 | 4.47099800  | 2.70817800  |
| C | -3.51592200 | 2.42865200  | 1.63448100  |
| C | -4.68962100 | 4.93049900  | 1.49783700  |
| H | -4.25409800 | 5.09117700  | 3.59583700  |
| C | -4.02584300 | 2.90067200  | 0.42466100  |
| H | -3.03637300 | 1.45483200  | 1.66517200  |
| C | -4.61885200 | 4.15084600  | 0.34198300  |
| C | 3.44158200  | 0.31036800  | 8.23977600  |
| H | 3.98943700  | -0.55272600 | 8.62661900  |
| H | 3.91433500  | 1.22053500  | 8.61760400  |
| H | 2.42923900  | 0.27040300  | 8.65022400  |
| H | 0.48126900  | 4.26473800  | 8.49008200  |
| H | -4.33631900 | 0.75532700  | 8.43298700  |
| H | -0.83134600 | -4.06242200 | 8.56637500  |
| H | 4.98396800  | 4.21524000  | 3.80967700  |
| H | -0.37221100 | 3.39214700  | 2.94803800  |
| H | -1.29196000 | 4.19126300  | 8.46818000  |
| H | 5.05623600  | -4.55036700 | -0.26281500 |
| H | -4.51107700 | -5.03957400 | -0.47232100 |
| H | -5.02018800 | 4.51409900  | -0.59821600 |
| H | 4.56013200  | 5.02764900  | -0.39381800 |
| C | 3.95715100  | -2.05414000 | -0.56437800 |
| C | 5.25616700  | -6.27974100 | 1.78793400  |
| C | -2.00045400 | -3.94859000 | -0.66721800 |
| C | -6.32844500 | -5.22891500 | 1.51151100  |
| C | -3.90515100 | 2.01367300  | -0.78428200 |
| C | -5.29339600 | 6.30570700  | 1.39605800  |
| C | 2.06232800  | 3.92869100  | -0.68009400 |
| C | 6.28197500  | 5.26899400  | 1.66714200  |
| F | 4.59885100  | -2.60600000 | -1.60157900 |
| F | 2.68588000  | -1.83515000 | -0.94380400 |
| F | 4.50508200  | -0.84233600 | -0.34706600 |
| F | 4.51908500  | -7.12922700 | 1.04924800  |
| F | 5.38032900  | -6.81869000 | 3.00891000  |
| F | 6.48006300  | -6.24937200 | 1.23269400  |
| F | -1.77099400 | -2.67532200 | -1.03351700 |
| F | -2.50915200 | -4.58824900 | -1.72748700 |
| F | -0.79623200 | -4.49352700 | -0.40454800 |
| F | -6.32881600 | -6.36668100 | 0.79697000  |

|   |             |             |             |
|---|-------------|-------------|-------------|
| F | -6.84474400 | -5.50810400 | 2.71718700  |
| F | -7.18228500 | -4.38746200 | 0.89947300  |
| F | -2.61859200 | 1.80761100  | -1.11650000 |
| F | -4.52195100 | 2.52494300  | -1.85682900 |
| F | -4.43880000 | 0.79854000  | -0.55063200 |
| F | -6.43250900 | 6.29252300  | 0.68338500  |
| F | -4.46002900 | 7.16193500  | 0.77655500  |
| F | -5.57490600 | 6.82722600  | 2.59877300  |
| F | 6.74827100  | 5.56206500  | 2.88967700  |
| F | 7.16156500  | 4.42347300  | 1.09886100  |
| F | 6.30903700  | 6.39932900  | 0.94125500  |
| F | 0.85013200  | 4.48587700  | -0.49070600 |
| F | 1.84343800  | 2.64663400  | -1.02147500 |
| F | 2.62465100  | 4.53627200  | -1.73218800 |

## 5

|                                              |             |             |            |
|----------------------------------------------|-------------|-------------|------------|
| Zero-point correction=                       |             |             | 0.850443   |
| (Hartree/Particle)                           |             |             |            |
| Thermal correction to Energy=                |             | 0.914012    |            |
| Thermal correction to Enthalpy=              |             | 0.914956    |            |
| Thermal correction to Gibbs Free Energy=     |             | 0.751106    |            |
| Sum of electronic and zero-point Energies=   |             |             | -          |
| 4105.670708                                  |             |             |            |
| Sum of electronic and thermal Energies=      |             |             | -          |
| 4105.607140                                  |             |             |            |
| Sum of electronic and thermal Enthalpies=    |             |             | -          |
| 4105.606195                                  |             |             |            |
| Sum of electronic and thermal Free Energies= |             |             | -          |
| 4105.770045                                  |             |             |            |
| O                                            | 1.16942300  | 4.55931500  | 4.20349400 |
| O                                            | -1.18325400 | 4.53081500  | 4.10125200 |
| O                                            | -4.66064000 | 1.28572700  | 4.20799100 |
| O                                            | -4.70556700 | -1.06313100 | 4.23708200 |
| O                                            | -1.30505100 | -4.39468300 | 4.17382900 |
| O                                            | 1.05450500  | -4.43634200 | 4.22021000 |
| O                                            | 4.53672200  | -1.18950800 | 4.40961900 |
| O                                            | 4.50502800  | 1.16369000  | 4.31576100 |
| C                                            | 2.80523200  | 2.83063300  | 4.23517000 |
| C                                            | 1.70349300  | 3.45473700  | 4.83227100 |
| C                                            | 0.02766800  | 4.34500800  | 3.40885800 |
| C                                            | -1.75932500 | 3.44673100  | 4.72819800 |
| C                                            | -2.88092700 | 2.86127100  | 4.12701900 |
| C                                            | -3.52532800 | 1.80920200  | 4.78841700 |
| C                                            | -4.52858100 | 0.09976800  | 3.46198100 |
| C                                            | -3.58695200 | -1.61138500 | 4.82564800 |
| C                                            | -2.97929600 | -2.69687100 | 4.18348400 |
| C                                            | -1.86646200 | -3.29415700 | 4.78739200 |
| C                                            | -0.10798100 | -4.20253000 | 3.46205100 |
| C                                            | 1.62643000  | -3.35482500 | 4.85620300 |
| C                                            | 2.78317600  | -2.79642500 | 4.29832900 |
| C                                            | 3.38887800  | -1.72091800 | 4.95838700 |
| C                                            | 4.37845400  | -0.04490200 | 3.60623300 |
| C                                            | 3.37634100  | 1.72362400  | 4.87557900 |
| C                                            | 1.77835500  | 1.90898200  | 6.65060600 |
| C                                            | 1.17072600  | 3.00674200  | 6.04145200 |
| C                                            | -0.07492300 | 3.67646800  | 6.59995400 |
| C                                            | -1.29685400 | 3.01577400  | 5.97722000 |
| C                                            | -1.96319400 | 1.95518900  | 6.59011400 |
| C                                            | -3.07487300 | 1.33355800  | 6.02213200 |
| C                                            | -3.74829600 | 0.12236700  | 6.65056100 |
| C                                            | -3.11272400 | -1.12045200 | 6.04459900 |

|   |             |             |            |
|---|-------------|-------------|------------|
| C | -2.01081200 | -1.75654400 | 6.61604500 |
| C | -1.37692900 | -2.84528800 | 6.01829400 |
| C | -0.16009200 | -3.52169800 | 6.63175400 |
| C | 1.09859900  | -2.88318200 | 6.06307600 |
| C | 1.73398600  | -1.80518100 | 6.67856700 |
| C | 2.87383800  | -1.20241700 | 6.14723100 |
| C | 3.51176400  | 0.03654600  | 6.75564200 |
| C | 2.88071600  | 1.25706900  | 6.09965800 |
| C | 3.35912100  | 3.36774800  | 2.96584700 |
| C | 3.33615100  | 2.65407600  | 1.76459900 |
| C | 3.85581200  | 3.18456600  | 0.58611100 |
| C | 4.40593200  | 4.45549400  | 0.61094300 |
| C | 4.44038200  | 5.19527900  | 1.78601700 |
| C | 3.91651600  | 4.64488500  | 2.94878100 |
| C | -0.11204900 | 3.71406800  | 8.12869000 |
| C | -3.73602300 | 0.13518600  | 8.17953800 |
| C | -0.18734300 | -3.55058600 | 8.16127700 |
| H | 0.04627800  | 5.11765200  | 2.64014700 |
| H | -3.55206200 | 0.07462100  | 2.95844400 |
| H | -5.35065600 | 0.10641900  | 2.74704300 |
| H | -0.08228800 | -3.18263200 | 3.05458000 |
| H | -0.10510500 | -4.95561500 | 2.67287600 |
| H | 5.20701700  | -0.05600900 | 2.89808800 |
| H | 3.40619700  | -0.08753900 | 3.09642400 |
| H | 1.37714600  | 1.54843200  | 7.59262600 |
| H | -0.06180700 | 4.71061000  | 6.24138300 |
| H | -1.60443200 | 1.60205600  | 7.55178800 |
| H | -4.79232400 | 0.13537000  | 6.32248100 |
| H | -1.63128000 | -1.38928400 | 7.56449400 |
| H | -0.16962500 | -4.55851700 | 6.28085000 |
| H | 1.32209500  | -1.41720900 | 7.60509700 |
| H | 4.56494700  | 0.02799600  | 6.45819000 |
| H | 2.88559000  | 1.66716600  | 1.75062700 |
| H | -0.11319300 | 2.72063200  | 8.58483300 |
| H | -2.72818400 | 0.12110900  | 8.60285700 |
| H | -4.26732100 | -0.73987900 | 8.56249100 |
| H | -0.17890800 | -2.55480300 | 8.61189800 |
| H | 0.68511300  | -4.09063400 | 8.53789700 |
| C | -3.53725000 | -3.20530000 | 2.90411900 |
| C | -4.81052000 | -3.77113400 | 2.88941300 |
| C | -2.84682800 | -3.12971600 | 1.69161600 |
| C | -5.37902200 | -4.25417500 | 1.71773300 |
| C | -3.39596400 | -3.60692800 | 0.50378000 |
| H | -1.86454300 | -2.66877400 | 1.67718500 |
| C | -4.66193700 | -4.16818900 | 0.53119100 |
| C | 3.38513600  | -3.33018900 | 3.04983400 |
| C | 4.65679100  | -3.89892700 | 3.09234400 |
| C | 2.74050100  | -3.27651300 | 1.81096400 |
| C | 5.26776500  | -4.40324900 | 1.95134300 |
| C | 3.33245800  | -3.77579900 | 0.65322200 |
| H | 1.75924500  | -2.81726900 | 1.75129900 |
| C | 4.59585900  | -4.33743200 | 0.73749800 |
| C | -3.41024800 | 3.35392200  | 2.82953200 |
| C | -4.67048200 | 3.94620800  | 2.78216400 |
| C | -2.70094900 | 3.23983900  | 1.63081900 |
| C | -5.20890700 | 4.41696500  | 1.59133600 |
| C | -3.21971700 | 3.70471300  | 0.42465600 |
| H | -1.72733800 | 2.76094400  | 1.64279100 |
| C | -4.47404100 | 4.29218400  | 0.41921400 |
| C | 3.45811200  | 0.06348300  | 8.28389100 |
| H | 3.97345400  | -0.81184800 | 8.68740000 |
| H | 3.95350000  | 0.96294900  | 8.65843400 |

|   |             |             |             |
|---|-------------|-------------|-------------|
| H | 2.43930500  | 0.05796000  | 8.68006000  |
| H | 0.76262700  | 4.24943500  | 8.50678400  |
| H | -4.23619500 | 1.03474800  | 8.54738200  |
| H | -1.08990600 | -4.06136400 | 8.50652200  |
| H | 0.06717400  | 3.33678000  | 2.97411300  |
| H | -1.01217100 | 4.23396100  | 8.46670200  |
| F | 5.19997500  | -4.82709600 | -0.34998000 |
| F | 4.91450900  | 5.00200500  | -0.49838300 |
| F | -5.00900300 | 4.75157100  | -0.71699400 |
| F | -5.22546300 | -4.63812100 | -0.58651300 |
| F | 6.48125900  | -4.94661100 | 2.02338100  |
| F | -6.59522900 | -4.79613000 | 1.73433400  |
| F | -6.41366300 | 4.98451500  | 1.57613900  |
| F | 4.97228800  | 6.41605400  | 1.80051900  |
| F | 5.32089200  | -3.98667300 | 4.24431300  |
| F | 3.97313400  | 5.37361300  | 4.06326100  |
| F | -5.51741700 | -3.87532600 | 4.01436700  |
| F | -5.39304700 | 4.08995200  | 3.89285800  |
| H | 3.83994300  | 2.63562800  | -0.34810900 |
| H | 2.83764500  | -3.73538000 | -0.31004500 |
| H | -2.86693900 | -3.54779000 | -0.44012000 |
| H | -2.67475600 | 3.61763700  | -0.50796100 |

### 5-1in

|                                              |             |             |            |
|----------------------------------------------|-------------|-------------|------------|
| Zero-point correction=                       |             |             | 0.850324   |
| (Hartree/Particle)                           |             |             |            |
| Thermal correction to Energy=                |             | 0.914083    |            |
| Thermal correction to Enthalpy=              |             | 0.915028    |            |
| Thermal correction to Gibbs Free Energy=     |             | 0.749086    |            |
| Sum of electronic and zero-point Energies=   |             |             | -          |
| 4105.674684                                  |             |             |            |
| Sum of electronic and thermal Energies=      |             |             | -          |
| 4105.610925                                  |             |             |            |
| Sum of electronic and thermal Enthalpies=    |             |             | -          |
| 4105.609980                                  |             |             |            |
| Sum of electronic and thermal Free Energies= |             |             | -          |
| 4105.775922                                  |             |             |            |
| O                                            | 1.14566100  | 4.58792000  | 4.21995600 |
| O                                            | -1.20481600 | 4.55409100  | 4.11815000 |
| O                                            | -4.63082500 | 1.25691100  | 4.18318100 |
| O                                            | -4.62831300 | -1.09081500 | 4.20615000 |
| O                                            | -1.23390800 | -4.41791400 | 4.23938900 |
| O                                            | 1.11345600  | -4.49885300 | 4.36014500 |
| O                                            | 4.50480400  | -1.16404600 | 4.40049400 |
| O                                            | 4.47257700  | 1.18765400  | 4.31364700 |
| C                                            | 2.76937700  | 2.84991200  | 4.23875100 |
| C                                            | 1.67780900  | 3.48078300  | 4.84507000 |
| C                                            | 0.00522900  | 4.37942400  | 3.42179800 |
| C                                            | -1.77063100 | 3.46101100  | 4.73864500 |
| C                                            | -2.87667100 | 2.85980600  | 4.12594400 |
| C                                            | -3.51279000 | 1.79851500  | 4.77958000 |
| C                                            | -4.46093800 | 0.07604000  | 3.43595300 |
| C                                            | -3.51394200 | -1.62151300 | 4.81824800 |
| C                                            | -2.88001900 | -2.69994200 | 4.19169500 |
| C                                            | -1.78818100 | -3.30116300 | 4.82846900 |
| C                                            | -0.01760800 | -4.27789000 | 3.54862100 |
| C                                            | 1.66690900  | -3.39262800 | 4.96773400 |
| C                                            | 2.78815200  | -2.81027200 | 4.37045300 |
| C                                            | 3.37938100  | -1.70330100 | 4.98556700 |
| C                                            | 4.32249000  | -0.01663500 | 3.60267000 |
| C                                            | 3.35030400  | 1.75112900  | 4.88239600 |

|   |             |             |            |
|---|-------------|-------------|------------|
| C | 1.76626000  | 1.94009900  | 6.66824200 |
| C | 1.15337900  | 3.03546800  | 6.05955400 |
| C | -0.09541000 | 3.69995000  | 6.61809500 |
| C | -1.31144400 | 3.03262400  | 5.98995600 |
| C | -1.97023100 | 1.96338300  | 6.59605300 |
| C | -3.06925500 | 1.32839300  | 6.01776700 |
| C | -3.73463800 | 0.10913100  | 6.63974800 |
| C | -3.07416400 | -1.12821200 | 6.04926700 |
| C | -1.98423600 | -1.75934000 | 6.64882100 |
| C | -1.33285000 | -2.84968600 | 6.07263200 |
| C | -0.13256100 | -3.52076400 | 6.72677200 |
| C | 1.13556300  | -2.89817500 | 6.16211300 |
| C | 1.75824000  | -1.79233500 | 6.74174700 |
| C | 2.87865400  | -1.17868500 | 6.18059100 |
| C | 3.51145200  | 0.07447700  | 6.76709400 |
| C | 2.86675900  | 1.28864100  | 6.11209400 |
| C | 3.29397000  | 3.35815000  | 2.94502000 |
| C | 3.19101100  | 2.63415000  | 1.75373300 |
| C | 3.68162200  | 3.13308900  | 0.54903400 |
| C | 4.28203700  | 4.38122400  | 0.53791100 |
| C | 4.39399000  | 5.13047200  | 1.70236900 |
| C | 3.89762100  | 4.61221900  | 2.89166600 |
| C | -0.13670100 | 3.73436500  | 8.14663200 |
| C | -3.74709400 | 0.12940400  | 8.16864500 |
| C | -0.18535800 | -3.51233600 | 8.25551400 |
| H | 0.02200600  | 5.16061900  | 2.66190100 |
| H | -3.47521600 | 0.07228400  | 2.95027900 |
| H | -5.26975400 | 0.06743300  | 2.70609300 |
| H | 0.04918800  | -3.28297100 | 3.08866600 |
| H | -0.00995500 | -5.07111900 | 2.80102300 |
| H | 5.13007900  | -0.02982300 | 2.87053300 |
| H | 3.33602200  | -0.05638700 | 3.12393700 |
| H | 1.37074800  | 1.58135200  | 7.61345000 |
| H | -0.08650900 | 4.73459400  | 6.26085400 |
| H | -1.61416200 | 1.61208800  | 7.55946500 |
| H | -4.77346600 | 0.10665300  | 6.29498800 |
| H | -1.63224900 | -1.38962400 | 7.60680600 |
| H | -0.14226800 | -4.56497300 | 6.39818100 |
| H | 1.34861900  | -1.38714300 | 7.66207200 |
| H | 4.56077500  | 0.07176300  | 6.45534200 |
| H | 2.70054300  | 1.66589100  | 1.76834700 |
| H | -0.13516800 | 2.73988300  | 8.60056600 |
| H | -2.74593200 | 0.13466600  | 8.60780700 |
| H | -4.26963300 | -0.75261400 | 8.54783700 |
| H | -0.16659600 | -2.50590500 | 8.68167300 |
| H | 0.67202400  | -4.05703000 | 8.65929500 |
| C | -3.38067200 | -3.19678100 | 2.88402900 |
| C | -4.62491100 | -3.81808000 | 2.81239100 |
| C | -2.65549700 | -3.05215200 | 1.69802700 |
| C | -5.13281000 | -4.29156500 | 1.60938200 |
| C | -3.14415300 | -3.51900800 | 0.47974000 |
| H | -1.69526900 | -2.54687800 | 1.72925600 |
| C | -4.38285100 | -4.13800100 | 0.45014500 |
| C | 3.32582000  | -3.34581100 | 3.09076800 |
| C | 4.24543400  | -4.39680100 | 3.04612900 |
| C | 2.90914400  | -2.80196400 | 1.88149200 |
| C | 4.73399600  | -4.88486200 | 1.83764500 |
| C | 3.38130400  | -3.26979300 | 0.66178700 |
| C | 4.29582400  | -4.31389300 | 0.65295000 |
| C | -3.39677800 | 3.34193200  | 2.82042800 |
| C | -4.64952100 | 3.94822100  | 2.76193100 |
| C | -2.68675400 | 3.20034700  | 1.62516900 |

|   |             |             |             |
|---|-------------|-------------|-------------|
| C | -5.17961400 | 4.40880600  | 1.56356600  |
| C | -3.19754000 | 3.65420900  | 0.41121200  |
| H | -1.72025100 | 2.70739600  | 1.64575500  |
| C | -4.44390200 | 4.25796700  | 0.39494000  |
| C | 3.47885100  | 0.11555700  | 8.29583400  |
| H | 4.00150900  | -0.75442600 | 8.70178600  |
| H | 3.97662600  | 1.02013900  | 8.65454700  |
| H | 2.46542700  | 0.11187500  | 8.70548600  |
| H | 0.73469200  | 4.27255200  | 8.52839700  |
| H | -4.26790300 | 1.02234200  | 8.52376400  |
| H | -1.10143600 | -3.99954000 | 8.59929900  |
| H | 0.04734000  | 3.37658000  | 2.97547500  |
| H | -1.03994500 | 4.24970100  | 8.48330500  |
| F | 4.74186300  | -4.75517900 | -0.52761400 |
| F | 4.76597600  | 4.89751600  | -0.59687800 |
| F | -4.97117800 | 4.70790100  | -0.74874900 |
| F | -4.88918000 | -4.60074000 | -0.69798100 |
| F | 2.95750200  | -2.72200200 | -0.47851100 |
| F | -6.32325100 | -4.88787700 | 1.56995400  |
| F | -6.37764200 | 4.99038400  | 1.53740500  |
| F | 4.97258900  | 6.33000300  | 1.68094800  |
| F | 4.02457400  | 5.34925700  | 3.99532300  |
| F | -5.36177200 | -3.98518600 | 3.91087200  |
| F | -5.37362700 | 4.11312100  | 3.86908500  |
| F | 2.01817700  | -1.79280700 | 1.85796400  |
| H | 4.57781100  | -4.83456500 | 3.98098300  |
| H | 3.60375400  | 2.57647500  | -0.37757900 |
| H | 5.44767900  | -5.69930900 | 1.79525800  |
| H | -2.58768100 | -3.40787000 | -0.44352500 |
| H | -2.65243600 | 3.54525000  | -0.51902500 |

### 5-2syn-in

|                                              |             |             |            |
|----------------------------------------------|-------------|-------------|------------|
| Zero-point correction=                       |             |             | 0.850945   |
| (Hartree/Particle)                           |             |             |            |
| Thermal correction to Energy=                |             | 0.914422    |            |
| Thermal correction to Enthalpy=              |             | 0.915366    |            |
| Thermal correction to Gibbs Free Energy=     |             | 0.751829    |            |
| Sum of electronic and zero-point Energies=   |             |             | -          |
| 4105.676668                                  |             |             |            |
| Sum of electronic and thermal Energies=      |             |             | -          |
| 4105.613192                                  |             |             |            |
| Sum of electronic and thermal Enthalpies=    |             |             | -          |
| 4105.612247                                  |             |             |            |
| Sum of electronic and thermal Free Energies= |             |             | -          |
| 4105.775784                                  |             |             |            |
| O                                            | 1.09194200  | 4.40541900  | 3.99259800 |
| O                                            | -1.27087800 | 4.43392700  | 4.00754100 |
| O                                            | -4.79138500 | 1.23715400  | 4.29388900 |
| O                                            | -4.79016400 | -1.11015100 | 4.32241600 |
| O                                            | -1.26505700 | -4.30787800 | 4.11276500 |
| O                                            | 1.09788500  | -4.27573900 | 4.09625800 |
| O                                            | 4.62619300  | -1.10018400 | 4.50292000 |
| O                                            | 4.62437700  | 1.24528400  | 4.47476200 |
| C                                            | 2.84345600  | 2.81086500  | 4.22258000 |
| C                                            | 1.65954500  | 3.37846900  | 4.71452000 |
| C                                            | -0.10081100 | 4.12703000  | 3.28778600 |
| C                                            | -1.87035100 | 3.39364200  | 4.68386400 |
| C                                            | -3.01464500 | 2.80912300  | 4.12900900 |
| C                                            | -3.64045900 | 1.77198800  | 4.83056900 |
| C                                            | -4.66902100 | 0.05424700  | 3.53985800 |
| C                                            | -3.63859800 | -1.63045900 | 4.87191000 |



|   |             |             |            |
|---|-------------|-------------|------------|
| C | -3.01173200 | -2.68363600 | 4.19566200 |
| C | -1.86633600 | -3.25277000 | 4.76404700 |
| C | -0.09568100 | -4.01578300 | 3.38570900 |
| C | 1.66427300  | -3.23120500 | 4.79348700 |
| C | 2.84766300  | -2.67417700 | 4.28831600 |
| C | 3.44658100  | -1.62296500 | 4.99231300 |
| C | 4.53949400  | 0.06320300  | 3.71362000 |
| C | 3.44403800  | 1.77789200  | 4.95158400 |
| C | 1.74802400  | 1.93962600  | 6.62624200 |
| C | 1.11855100  | 2.97960100  | 5.94155200 |
| C | -0.12923900 | 3.66459700  | 6.48002600 |
| C | -1.36967300 | 2.98410600  | 5.92280800 |
| C | -2.01770300 | 1.93767000  | 6.57820400 |
| C | -3.14798600 | 1.31031200  | 6.05437200 |
| C | -3.78747200 | 0.09323000  | 6.70793900 |
| C | -3.14629500 | -1.13838600 | 6.08390200 |
| C | -2.01480200 | -1.75110500 | 6.62234500 |
| C | -1.36566300 | -2.81237100 | 5.99238300 |
| C | -0.12407300 | -3.47738600 | 6.56539100 |
| C | 1.12259400  | -2.80354200 | 6.01051900 |
| C | 1.75039700  | -1.74641100 | 6.67000600 |
| C | 2.90155300  | -1.13148100 | 6.18211400 |
| C | 3.51270700  | 0.09992500  | 6.83562300 |
| C | 2.89987100  | 1.31461800  | 6.15304800 |
| C | 3.48988100  | 3.32217100  | 2.98516400 |
| C | 2.87839100  | 3.19424900  | 1.74391500 |
| C | 3.46286500  | 3.67732600  | 0.58005700 |
| C | 4.69984000  | 4.30091400  | 0.65796800 |
| C | 5.35025300  | 4.43733800  | 1.87468500 |
| C | 4.74186400  | 3.94594100  | 3.02496300 |
| C | -0.14098500 | 3.78177300  | 8.00605300 |
| C | -3.72956200 | 0.11164900  | 8.23560000 |
| C | -0.13537600 | -3.55832800 | 8.09376600 |
| H | -0.09344200 | 4.79388000  | 2.42471500 |
| H | -3.71517100 | 0.04814500  | 2.99418000 |
| H | -5.52121400 | 0.04560800  | 2.86119300 |
| H | -0.10802000 | -2.97001100 | 3.06270000 |
| H | -0.08743400 | -4.70236200 | 2.53826700 |
| H | 5.42170700  | 0.05623700  | 3.07434800 |
| H | 3.61069200  | 0.05545900  | 3.12613600 |
| H | 1.32059200  | 1.60332800  | 7.56566500 |
| H | -0.12395400 | 4.68010100  | 6.07091800 |
| H | -1.62533700 | 1.59573300  | 7.53109200 |
| H | -4.84047200 | 0.08887900  | 6.41020000 |
| H | -1.62242100 | -1.38528200 | 7.56633200 |
| H | -0.11729600 | -4.50231500 | 6.18055500 |
| H | 1.32222200  | -1.38820300 | 7.60096400 |
| H | 4.57809800  | 0.09767800  | 6.58593100 |
| H | -0.15864200 | 2.81340700  | 8.51284300 |
| H | -2.70915600 | 0.11697400  | 8.62810600 |
| H | -4.23322300 | -0.77138900 | 8.63726500 |
| H | -0.15434600 | -2.57827700 | 8.57749000 |
| H | 0.75607300  | -4.08385700 | 8.44612900 |
| C | -3.57050600 | -3.17925900 | 2.91187600 |
| C | -4.83251500 | -3.76934500 | 2.89422000 |
| C | -2.88745600 | -3.06852800 | 1.69725000 |
| C | -5.39837400 | -4.24119500 | 1.71682000 |
| C | -3.43471000 | -3.53450200 | 0.50423600 |
| H | -1.91291300 | -2.59123000 | 1.68339500 |
| C | -4.68986700 | -4.11971000 | 0.52826500 |
| C | 3.49630300  | -3.21476900 | 3.06459300 |
| C | 4.75171600  | -3.83045100 | 3.12096100 |

|   |             |             |             |
|---|-------------|-------------|-------------|
| C | 2.88442000  | -3.12327500 | 1.82031400  |
| C | 5.36302400  | -4.34900700 | 1.98424500  |
| C | 3.47174200  | -3.63411600 | 0.66979800  |
| C | 4.71206800  | -4.24861400 | 0.76430100  |
| C | -3.57355100 | 3.27217900  | 2.83318100  |
| C | -4.83635300 | 3.85987700  | 2.80040500  |
| C | -2.88988300 | 3.13212400  | 1.62192900  |
| C | -5.40242200 | 4.30138900  | 1.61139600  |
| C | -3.43733000 | 3.56738900  | 0.41746400  |
| H | -1.91472000 | 2.65589800  | 1.62032600  |
| C | -4.69329000 | 4.15128200  | 0.42647800  |
| C | 3.38507700  | 0.11784600  | 8.35909200  |
| H | 3.87133200  | -0.76424500 | 8.78382100  |
| H | 3.86963800  | 1.01065600  | 8.76282700  |
| H | 2.34807600  | 0.12090100  | 8.70466300  |
| H | 0.74961700  | 4.31681800  | 8.34601300  |
| H | -4.23428400 | 1.00351000  | 8.61587700  |
| H | -1.01949100 | -4.10729700 | 8.42788400  |
| H | -0.11120200 | 3.07404600  | 2.98905800  |
| H | -1.02598600 | 4.33719400  | 8.32690400  |
| F | 5.26559100  | -4.73656800 | -0.35076800 |
| F | 5.25060000  | 4.76222100  | -0.46971800 |
| F | -5.25545200 | 4.58323700  | -0.70758800 |
| F | -5.25170900 | -4.58069100 | -0.59448400 |
| F | 2.85031300  | -3.52690300 | -0.50541200 |
| F | -6.60430100 | -4.80760800 | 1.73029700  |
| F | -6.60916900 | 4.86619300  | 1.61022200  |
| F | 2.84200300  | 3.53538000  | -0.59174700 |
| F | 1.69755800  | -2.50916400 | 1.68614000  |
| H | 5.25136100  | -3.89804200 | 4.08113200  |
| H | 5.24108600  | 4.04210200  | 3.98291200  |
| F | 1.69464300  | 2.57063600  | 1.62665200  |
| F | -5.53452300 | 4.02837500  | 3.92379500  |
| F | -5.53008900 | -3.91088200 | 4.02171800  |
| H | 6.31703500  | 4.92616000  | 1.90221600  |
| H | 6.33246700  | -4.83160100 | 2.02483600  |
| H | -2.90994300 | -3.44874100 | -0.44002100 |
| H | -2.91209900 | 3.45888300  | -0.52419200 |

### 5-2anti-in

|                                              |             |             |            |
|----------------------------------------------|-------------|-------------|------------|
| Zero-point correction=                       |             | 0.850988    |            |
| (Hartree/Particle)                           |             |             |            |
| Thermal correction to Energy=                |             | 0.914468    |            |
| Thermal correction to Enthalpy=              |             | 0.915412    |            |
| Thermal correction to Gibbs Free Energy=     |             | 0.751786    |            |
| Sum of electronic and zero-point Energies=   |             | -           |            |
| 4105.676999                                  |             |             |            |
| Sum of electronic and thermal Energies=      |             | -           |            |
| 4105.613519                                  |             |             |            |
| Sum of electronic and thermal Enthalpies=    |             | -           |            |
| 4105.612575                                  |             |             |            |
| Sum of electronic and thermal Free Energies= |             | -           |            |
| 4105.776201                                  |             |             |            |
| O                                            | 1.10532100  | 4.77896200  | 4.37916800 |
| O                                            | -1.24014800 | 4.78582900  | 4.33438200 |
| O                                            | -4.40773700 | 1.25295800  | 3.92882500 |
| O                                            | -4.44822900 | -1.10787800 | 4.00774100 |
| O                                            | -1.27706300 | -4.63742600 | 4.43376300 |
| O                                            | 1.06854900  | -4.64599200 | 4.47954600 |
| O                                            | 4.25007000  | -1.11977200 | 4.11699900 |
| O                                            | 4.28917100  | 1.24264600  | 4.15018300 |

|   |             |             |            |   |             |             |             |
|---|-------------|-------------|------------|---|-------------|-------------|-------------|
| C | 2.67186600  | 2.99428600  | 4.24265200 | C | -3.88485600 | -4.71269600 | 2.91851900  |
| C | 1.61699200  | 3.61772900  | 4.91890800 | C | -3.13409300 | -2.80867900 | 1.68620200  |
| C | -0.05141000 | 4.67254500  | 3.58548100 | C | -4.31701100 | -5.31431000 | 1.74367200  |
| C | -1.78054100 | 3.62354500  | 4.84239400 | C | -3.55986500 | -3.39225900 | 0.49537400  |
| C | -2.80601700 | 3.00229100  | 4.12047800 | C | -4.15069000 | -4.64430900 | 0.53836700  |
| C | -3.38464200 | 1.83777600  | 4.64337100 | C | 3.18409600  | -3.50315200 | 3.05595100  |
| C | -4.12871200 | 0.04147000  | 3.25916500 | C | 3.80385700  | -4.75703600 | 3.09804100  |
| C | -3.41818800 | -1.69111100 | 4.71240600 | C | 3.08559800  | -2.88010000 | 1.81785600  |
| C | -2.83577200 | -2.85578200 | 4.19879800 | C | 4.32001200  | -5.35578000 | 1.95353900  |
| C | -1.80805300 | -3.46469300 | 4.92806100 | C | 3.59372400  | -3.45466600 | 0.65981600  |
| C | -0.09048700 | -4.54902900 | 3.68314100 | C | 4.21275900  | -4.69374100 | 0.74017200  |
| C | 1.59007600  | -3.47254400 | 4.98185000 | C | -3.29282900 | 3.60407800  | 2.85106200  |
| C | 2.64372000  | -2.86766300 | 4.28663500 | C | -3.92944700 | 4.84983200  | 2.83216800  |
| C | 3.20086400  | -1.69033800 | 4.80469700 | C | -3.12329000 | 2.95395400  | 1.63471000  |
| C | 3.99632800  | 0.07834500  | 3.41372300 | C | -4.39359100 | 5.41496600  | 1.64883100  |
| C | 3.23371900  | 1.84098600  | 4.80254700 | C | -3.57812100 | 3.49485300  | 0.43895500  |
| C | 1.72025000  | 1.97472100  | 6.65219100 | C | -4.21580200 | 4.72692800  | 0.45844600  |
| C | 1.11427000  | 3.11327700  | 6.12127900 | C | 3.51696400  | 0.08348800  | 8.11995600  |
| C | -0.12297900 | 3.74730900  | 6.74150800 | H | 4.03912200  | -0.81133900 | 8.46865800  |
| C | -1.33236300 | 3.11604700  | 6.06578300 | H | 4.06593300  | 0.96426700  | 8.46285500  |
| C | -1.96665000 | 1.98116000  | 6.56733200 | H | 2.53458400  | 0.10049300  | 8.59900100  |
| C | -3.00110900 | 1.33365100  | 5.89054300 | H | 0.72213900  | 4.16542800  | 8.68546700  |
| C | -3.69622200 | 0.10372200  | 6.45620300 | H | -4.36238900 | 1.03444700  | 8.29148400  |
| C | -3.01653600 | -1.15458700 | 5.93907000 | H | -1.05742300 | -3.93167700 | 8.73732800  |
| C | -1.97751000 | -1.78617500 | 6.62148900 | H | -0.04499000 | 3.72650000  | 3.02617300  |
| C | -1.35188100 | -2.93506700 | 6.13804600 | H | -1.05246000 | 4.16840900  | 8.64680000  |
| C | -0.13941300 | -3.55530000 | 6.81804900 | F | 4.69826100  | -5.23487300 | -0.38205300 |
| C | 1.09474600  | -2.93803900 | 6.17508000 | F | 4.59184000  | 5.27393300  | -0.51939800 |
| C | 1.70923900  | -1.79176600 | 6.67526400 | F | -4.64956700 | 5.23564600  | -0.69955000 |
| C | 2.76929900  | -1.15904200 | 6.02472200 | F | -4.57320100 | -5.24090500 | -0.58157100 |
| C | 3.44334800  | 0.08225300  | 6.59116200 | F | 3.47907000  | -2.82251900 | -0.50925200 |
| C | 2.78467900  | 1.32973000  | 6.02356100 | F | -4.88768500 | -6.51808800 | 1.77530300  |
| C | 3.17524400  | 3.56332700  | 2.96641700 | F | -3.39540700 | 2.83774200  | -0.70740200 |
| C | 3.06427900  | 2.89291100  | 1.74475500 | F | 4.81865900  | 6.60225800  | 1.81933400  |
| C | 3.53561000  | 3.45009600  | 0.55846700 | F | 2.46635500  | -1.69384600 | 1.69724500  |
| C | 4.12621800  | 4.70240200  | 0.59650800 | H | 3.87588400  | -5.26597500 | 4.05297800  |
| C | 4.24781400  | 5.39844400  | 1.79239700 | H | -4.05666700 | 5.37945200  | 3.76995900  |
| C | 3.77063800  | 4.82287300  | 2.96287200 | F | -2.48466100 | 1.77325100  | 1.57439000  |
| C | -0.15725900 | 3.66837400  | 8.26794200 | H | -2.65155600 | -1.83700500 | 1.65846200  |
| C | -3.82716500 | 0.13332000  | 7.98087300 | H | 2.58189900  | 1.92108400  | 1.71992500  |
| C | -0.16246500 | -3.44382200 | 8.34264800 | F | -4.06819600 | -5.37421900 | 4.06185000  |
| H | -0.03633900 | 5.53472100  | 2.91959600 | F | 3.91137100  | 5.50916500  | 4.09766500  |
| H | -3.07313700 | 0.01743700  | 2.97041000 | H | 3.44910800  | 2.93536400  | -0.39122600 |
| H | -4.78793000 | 0.02754900  | 2.39028500 | H | 4.80503500  | -6.32441300 | 1.98301100  |
| H | -0.07433700 | -3.61573700 | 3.10304200 | H | -3.43787100 | -2.89820700 | -0.46136900 |
| H | -0.08108200 | -5.42581200 | 3.03652300 | H | -4.89142300 | 6.37736800  | 1.63053300  |
| H | 4.68637700  | 0.07488000  | 2.56905100 |   |             |             |             |
| H | 2.95191700  | 0.09667700  | 3.08655000 |   |             |             |             |
| H | 1.34635600  | 1.57249700  | 7.58879400 |   |             |             |             |
| H | -0.11419700 | 4.80420900  | 6.45807600 |   |             |             |             |
| H | -1.64237100 | 1.58269600  | 7.52362600 |   |             |             |             |
| H | -4.70797700 | 0.10198700  | 6.03781600 |   |             |             |             |
| H | -1.64004500 | -1.36469800 | 7.56341000 |   |             |             |             |
| H | -0.13784600 | -4.61797300 | 6.55694600 |   |             |             |             |
| H | 1.34838100  | -1.37218500 | 7.60917100 |   |             |             |             |
| H | 4.47012600  | 0.07560900  | 6.21123500 |   |             |             |             |
| H | -0.16734700 | 2.64275200  | 8.64619000 |   |             |             |             |
| H | -2.86337100 | 0.12726800  | 8.49658800 |   |             |             |             |
| H | -4.38821200 | -0.74094600 | 8.32086300 |   |             |             |             |
| H | -0.16546200 | -2.41036900 | 8.69906900 |   |             |             |             |
| H | 0.71736100  | -3.93584100 | 8.76547900 |   |             |             |             |
| C | -3.29062600 | -3.45258500 | 2.91707200 |   |             |             |             |

### 5-3in

|                                              |          |
|----------------------------------------------|----------|
| Zero-point correction=                       | 0.850812 |
| (Hartree/Particle)                           |          |
| Thermal correction to Energy=                | 0.914412 |
| Thermal correction to Enthalpy=              | 0.915356 |
| Thermal correction to Gibbs Free Energy=     | 0.750657 |
| Sum of electronic and zero-point Energies=   | -        |
| 4105.677796                                  |          |
| Sum of electronic and thermal Energies=      | -        |
| 4105.614197                                  |          |
| Sum of electronic and thermal Enthalpies=    | -        |
| 4105.613252                                  |          |
| Sum of electronic and thermal Free Energies= | -        |
| 4105.777952                                  |          |

|   |             |             |            |   |             |             |             |
|---|-------------|-------------|------------|---|-------------|-------------|-------------|
| O | 1.02322400  | 4.43356400  | 4.01940300 | H | 1.32801700  | -1.39257000 | 7.59458200  |
| O | -1.33301700 | 4.49314200  | 4.09451500 | H | 4.55665800  | 0.12774200  | 6.54493400  |
| O | -4.75390900 | 1.18570800  | 4.23879900 | H | -0.18491500 | 2.77451900  | 8.54399700  |
| O | -4.77158700 | -1.16332700 | 4.31911400 | H | -2.73463500 | 0.07729000  | 8.62486300  |
| O | -1.24545500 | -4.36254700 | 4.14179800 | H | -4.26328600 | -0.80211900 | 8.61517600  |
| O | 1.11609500  | -4.30423600 | 4.10880000 | H | -0.13260400 | -2.58783700 | 8.58611200  |
| O | 4.59623500  | -1.06959400 | 4.46255200 | H | 0.79548400  | -4.08322300 | 8.46165700  |
| O | 4.56401400  | 1.27580400  | 4.43448100 | C | -3.53955500 | -3.23664200 | 2.91827300  |
| C | 2.77226400  | 2.83474600  | 4.21360900 | C | -4.76784300 | -3.89237100 | 2.89589700  |
| C | 1.59142800  | 3.39483900  | 4.72325800 | C | -2.87599400 | -3.05346100 | 1.70175000  |
| C | -0.18725300 | 4.19640900  | 3.32853400 | C | -5.31890000 | -4.36324800 | 1.71132100  |
| C | -1.91697300 | 3.42780000  | 4.74466100 | C | -3.40944100 | -3.51659700 | 0.50112900  |
| C | -3.02728600 | 2.81748000  | 4.15461700 | H | -1.93126800 | -2.51906400 | 1.69250600  |
| C | -3.62668300 | 1.73561600  | 4.80898900 | C | -4.62969500 | -4.17137300 | 0.52057200  |
| C | -4.61798500 | -0.01797000 | 3.51461600 | C | 3.49381900  | -3.21724800 | 3.05387400  |
| C | -3.62543800 | -1.68694600 | 4.87666100 | C | 4.76017900  | -3.81013000 | 3.11139500  |
| C | -2.99468100 | -2.74180300 | 4.20880700 | C | 2.87468400  | -3.15076900 | 1.81154500  |
| C | -1.85092000 | -3.30492600 | 4.78445600 | C | 5.37546300  | -4.33121500 | 1.97807700  |
| C | -0.08478700 | -4.06762400 | 3.40152200 | C | 3.46591100  | -3.66501500 | 0.66435000  |
| C | 1.67194900  | -3.24636100 | 4.79410200 | C | 4.71716100  | -4.25657900 | 0.76024300  |
| C | 2.84308300  | -2.67531200 | 4.27598100 | C | -3.55554400 | 3.31460200  | 2.85586800  |
| C | 3.43139200  | -1.60993200 | 4.96777600 | C | -4.35505300 | 4.45749100  | 2.77042800  |
| C | 4.47966100  | 0.09265200  | 3.67471000 | C | -3.25109200 | 2.64902300  | 1.67411300  |
| C | 3.38629900  | 1.79910300  | 4.92789500 | C | -4.84217900 | 4.91462200  | 1.54957700  |
| C | 1.71431300  | 1.94562700  | 6.62673900 | C | -3.72577900 | 3.08351700  | 0.44269000  |
| C | 1.07148200  | 2.98776200  | 5.95794100 | C | -4.52289300 | 4.21877800  | 0.39408200  |
| C | -0.16613100 | 3.66689200  | 6.52913700 | C | 3.38464500  | 0.13229200  | 8.33184300  |
| C | -1.41082400 | 2.99613000  | 5.97201000 | H | 3.88647600  | -0.74445200 | 8.74949300  |
| C | -2.04221200 | 1.91993300  | 6.59478000 | H | 3.86317400  | 1.03046300  | 8.73097500  |
| C | -3.14858500 | 1.27450400  | 6.04165100 | H | 2.35184400  | 0.12228100  | 8.68973400  |
| C | -3.78620100 | 0.05267200  | 6.68972200 | H | 0.74209900  | 4.26889700  | 8.39880900  |
| C | -3.13592000 | -1.18229300 | 6.08355400 | H | -4.25416200 | 0.97294700  | 8.58967400  |
| C | -2.00317400 | -1.78632100 | 6.62944100 | H | -0.97976300 | -4.12837600 | 8.45250600  |
| C | -1.35135100 | -2.85157400 | 6.00882600 | H | -0.22895400 | 3.15892700  | 2.98142200  |
| C | -0.10165500 | -3.50181100 | 6.58087900 | H | -1.03305300 | 4.31307200  | 8.39900400  |
| C | 1.13393700  | -2.81831000 | 6.01295100 | F | 5.27426800  | -4.74810900 | -0.35165900 |
| C | 1.75289000  | -1.74958500 | 6.66166800 | F | 5.15511400  | 4.86654000  | -0.45651900 |
| C | 2.89099900  | -1.12125200 | 6.16066300 | F | -4.97320600 | 4.62639300  | -0.79749200 |
| C | 3.49421400  | 0.11764000  | 6.80682600 | F | -5.17766200 | -4.63250100 | -0.60916000 |
| C | 2.86136100  | 1.32727600  | 6.13425400 | F | 2.83766100  | -3.58315800 | -0.50902100 |
| C | 3.41022300  | 3.36507300  | 2.97990900 | F | -6.49308700 | -4.99360500 | 1.71924000  |
| C | 2.78200000  | 3.27860800  | 1.74323000 | F | -3.41587600 | 2.41980600  | -0.67090100 |
| C | 3.36177100  | 3.78282500  | 0.58553500 | F | 2.72685400  | 3.68187300  | -0.58239400 |
| C | 4.60935200  | 4.38455500  | 0.66533700 | F | 1.67725500  | -2.55937600 | 1.67582600  |
| C | 5.27586300  | 4.47948900  | 1.87728800 | H | 5.26522200  | -3.85756700 | 4.06995300  |
| C | 4.67256800  | 3.96794700  | 3.02127400 | H | 5.18420100  | 4.03075900  | 3.97543500  |
| C | -0.15897100 | 3.75281900  | 8.05702900 | H | -4.59408900 | 4.99228900  | 3.68315600  |
| C | -3.74946500 | 0.07718300  | 8.21827400 | F | 1.58878400  | 2.67780400  | 1.62486100  |
| C | -0.10404900 | -3.57128600 | 8.10975500 | F | -2.46974400 | 1.55657300  | 1.69057100  |
| H | -0.18640700 | 4.90146100  | 2.49734000 | F | -5.44769300 | -4.09521100 | 4.02574100  |
| H | -3.65030000 | -0.04388400 | 2.99921800 | H | 6.25064400  | 4.95206500  | 1.90599400  |
| H | -5.45138400 | -0.03077500 | 2.81277200 | H | 6.35345200  | -4.79614300 | 2.01965200  |
| H | -0.11187900 | -3.02736900 | 3.06298600 | H | -2.90121700 | -3.37327100 | -0.44516000 |
| H | -0.07404300 | -4.76645900 | 2.56448600 | H | -5.46441300 | 5.79876100  | 1.47535800  |
| H | 5.34990600  | 0.09679500  | 3.01919200 |   |             |             |             |
| H | 3.54034600  | 0.07297400  | 3.10483500 |   |             |             |             |
| H | 1.30358300  | 1.60441100  | 7.57172300 |   |             |             |             |
| H | -0.16332200 | 4.68990600  | 6.13921700 |   |             |             |             |
| H | -1.65400500 | 1.56618200  | 7.54510500 |   |             |             |             |
| H | -4.83548900 | 0.04165400  | 6.37869300 |   |             |             |             |
| H | -1.61055100 | -1.40903700 | 7.56895900 |   |             |             |             |
| H | -0.08698200 | -4.52928100 | 6.20324500 |   |             |             |             |

### 5-4in

|                                          |          |
|------------------------------------------|----------|
| Zero-point correction=                   | 0.850958 |
| (Hartree/Particle)                       |          |
| Thermal correction to Energy=            | 0.914430 |
| Thermal correction to Enthalpy=          | 0.915374 |
| Thermal correction to Gibbs Free Energy= | 0.752073 |

|                                              |             |             |             |             |             |             |             |
|----------------------------------------------|-------------|-------------|-------------|-------------|-------------|-------------|-------------|
| Sum of electronic and zero-point Energies=   | -           | H           | 5.06671100  | -0.12388100 | 2.78865100  |             |             |
| 4105.678029                                  |             | H           | 3.28241000  | -0.13576800 | 3.08560300  |             |             |
| Sum of electronic and thermal Energies=      | -           | H           | 1.36956200  | 1.53735500  | 7.53982700  |             |             |
| 4105.614558                                  |             | H           | -0.02423000 | 4.74495300  | 6.23141300  |             |             |
| Sum of electronic and thermal Enthalpies=    | -           | H           | -1.58134000 | 1.62283500  | 7.47882600  |             |             |
| 4105.613613                                  |             | H           | -4.77576100 | 0.18733500  | 6.18408500  |             |             |
| Sum of electronic and thermal Free Energies= | -           | H           | -1.66537700 | -1.32791200 | 7.51117700  |             |             |
| 4105.776915                                  |             | H           | -0.22021200 | -4.56393100 | 6.33650500  |             |             |
| O                                            | 1.20926400  | 4.62555600  | 4.23006100  | H           | 1.28433900  | -1.41107600 | 7.57256900  |
| O                                            | -1.14392600 | 4.60254600  | 4.06549000  | H           | 4.53125400  | -0.00614600 | 6.37789600  |
| O                                            | -4.63565600 | 1.35574500  | 4.14438400  | H           | -0.10916500 | 2.72204600  | 8.54545100  |
| O                                            | -4.61325400 | -1.00166800 | 4.05825900  | H           | -2.77620100 | 0.17736200  | 8.51979000  |
| O                                            | -1.37040600 | -4.49110300 | 4.28229500  | H           | -4.29184200 | -0.72111800 | 8.42980200  |
| O                                            | 0.98775700  | -4.47218100 | 4.21672300  | H           | -0.23003500 | -2.48680500 | 8.60357300  |
| O                                            | 4.47518200  | -1.22252700 | 4.36311200  | H           | 0.66793100  | -4.00508400 | 8.57298300  |
| O                                            | 4.45620800  | 1.13241300  | 4.21893600  | C           | -3.55315900 | -3.36521500 | 2.93494900  |
| C                                            | 2.83469300  | 2.87472200  | 4.21768800  | C           | -4.15326100 | -4.62868900 | 2.97842800  |
| C                                            | 1.74243600  | 3.50336800  | 4.82722500  | C           | -3.49311300 | -2.72661800 | 1.70217500  |
| C                                            | 0.08833200  | 4.40383600  | 3.40254400  | C           | -4.68870200 | -5.22289700 | 1.84066700  |
| C                                            | -1.73843100 | 3.52812200  | 4.69181100  | C           | -4.02217300 | -3.29681200 | 0.55077100  |
| C                                            | -2.88455800 | 2.98007800  | 4.09791600  | C           | -4.62102400 | -4.54558800 | 0.63297800  |
| C                                            | -3.51968600 | 1.90804100  | 4.73572000  | C           | 3.36143200  | -3.45027100 | 3.08003300  |
| C                                            | -4.40572200 | 0.20785300  | 3.35707700  | C           | 4.62331600  | -4.05054900 | 3.15466600  |
| C                                            | -3.54568600 | -1.57643300 | 4.71398100  | C           | 2.73381300  | -3.43009000 | 1.84036300  |
| C                                            | -2.99387500 | -2.74231500 | 4.16359200  | C           | 5.22660500  | -4.62415800 | 2.04047000  |
| C                                            | -1.92758100 | -3.35610900 | 4.83139900  | C           | 3.31328700  | -3.99758400 | 0.71212000  |
| C                                            | -0.21532200 | -4.28749400 | 3.49821800  | C           | 4.56020800  | -4.59521200 | 0.82518700  |
| C                                            | 1.55727400  | -3.38360200 | 4.84182300  | C           | -3.46448100 | 3.54828300  | 2.85243500  |
| C                                            | 2.72803000  | -2.85017500 | 4.28378700  | C           | -4.72629700 | 4.15323000  | 2.85660700  |
| C                                            | 3.33585300  | -1.76192900 | 4.92090000  | C           | -2.78527800 | 3.49109300  | 1.64138200  |
| C                                            | 4.27747400  | -0.09409600 | 3.53958400  | C           | -5.28022800 | 4.69583700  | 1.70201100  |
| C                                            | 3.36303000  | 1.72200300  | 4.81679300  | C           | -3.31481500 | 4.02720700  | 0.47393900  |
| C                                            | 1.77747300  | 1.91089200  | 6.60568000  | C           | -4.56344900 | 4.63054700  | 0.51723000  |
| C                                            | 1.19274900  | 3.03135200  | 6.01986400  | C           | 3.44968400  | 0.05595700  | 8.21753800  |
| C                                            | -0.05089300 | 3.70600400  | 6.57448900  | H           | 3.96526200  | -0.81979300 | 8.62028600  |
| C                                            | -1.27503900 | 3.06853100  | 5.93157600  | H           | 3.95486500  | 0.95528000  | 8.57957500  |
| C                                            | -1.94541400 | 2.00055900  | 6.52838300  | H           | 2.43649200  | 0.05822100  | 8.62785000  |
| C                                            | -3.06002900 | 1.39718400  | 5.95035200  | H           | 0.76924100  | 4.24984700  | 8.49738200  |
| C                                            | -3.74025700 | 0.17198700  | 6.53812900  | H           | -4.30275800 | 1.05442600  | 8.42771600  |
| C                                            | -3.09684600 | -1.07255500 | 5.94180800  | H           | -1.10751900 | -4.01513500 | 8.55514700  |
| C                                            | -2.03469300 | -1.72327100 | 6.56997100  | H           | 0.13378500  | 3.39588000  | 2.97835300  |
| C                                            | -1.42698400 | -2.85660800 | 6.03448000  | H           | -1.00541300 | 4.23815200  | 8.44154300  |
| C                                            | -0.20755000 | -3.51712200 | 6.65567800  | F           | 5.10572400  | -5.13851300 | -0.26854100 |
| C                                            | 1.04255500  | -2.89416400 | 6.04947000  | F           | 5.15818800  | 5.10655700  | -0.39037500 |
| C                                            | 1.68786400  | -1.81162400 | 6.64774000  | F           | -5.06076100 | 5.14344900  | -0.61353100 |
| C                                            | 2.82603500  | -1.22200000 | 6.10236200  | F           | -5.12733700 | -5.08196600 | -0.48279000 |
| C                                            | 3.48201000  | 0.01706900  | 6.68837400  | F           | 2.67830000  | -3.96130400 | -0.45927200 |
| C                                            | 2.86422100  | 1.24659900  | 6.03668100  | F           | -3.94840000 | -2.65138300 | -0.61316300 |
| C                                            | 3.44440700  | 3.46903900  | 2.99893300  | F           | -2.63125700 | 3.95589700  | -0.66814900 |
| C                                            | 3.43482400  | 2.80177900  | 1.78002500  | F           | 3.98467400  | 2.67281500  | -0.51224600 |
| C                                            | 4.01100000  | 3.34523900  | 0.63831600  | F           | 1.54139300  | -2.83547700 | 1.68930700  |
| C                                            | 4.60668600  | 4.59583400  | 0.71596600  | H           | 5.13482100  | -4.06119000 | 4.11095600  |
| C                                            | 4.62524900  | 5.30103700  | 1.90931100  | H           | 4.04545800  | 5.27544200  | 3.97697500  |
| C                                            | 4.04311300  | 4.73332500  | 3.03765500  | H           | -5.27760400 | 4.19244500  | 3.78974500  |
| C                                            | -0.10309700 | 3.72180800  | 8.10347100  | H           | -4.19442300 | -5.14880500 | 3.92922700  |
| C                                            | -3.77143700 | 0.16948300  | 8.06777600  | F           | 2.84216000  | 1.60463700  | 1.66246500  |
| C                                            | -0.21891400 | -3.49675100 | 8.18549600  | F           | -1.58967600 | 2.88950400  | 1.55774600  |
| H                                            | 0.12509300  | 5.17071600  | 2.62907100  | F           | -2.89556800 | -1.53224400 | 1.58109900  |
| H                                            | -3.39293900 | 0.23849900  | 2.94316100  | H           | 5.09385800  | 6.27776900  | 1.93606300  |
| H                                            | -5.16364200 | 0.21942600  | 2.57405200  | H           | -6.25507400 | 5.16912800  | 1.70176400  |
| H                                            | -0.24155000 | -3.28889700 | 3.05078700  | H           | -5.15836000 | -6.19902300 | 1.87088300  |
| H                                            | -0.22029300 | -5.07086000 | 2.74057900  | H           | 6.20152500  | -5.09413700 | 2.09488500  |

7

Zero-point correction= 0.817561  
 (Hartree/Particle)  
 Thermal correction to Energy= 0.884995  
 Thermal correction to Enthalpy= 0.885939  
 Thermal correction to Gibbs Free Energy= 0.713327  
 Sum of electronic and zero-point Energies= -  
 4502.508735  
 Sum of electronic and thermal Energies= -  
 4502.441301  
 Sum of electronic and thermal Enthalpies= -  
 4502.440357  
 Sum of electronic and thermal Free Energies= -  
 4502.612969  
 O 1.16516900 4.56292500 4.19909600  
 O -1.18821300 4.53220000 4.09700700  
 O -4.66304600 1.28526600 4.20359500  
 O -4.70796000 -1.06441500 4.23311900  
 O -1.30412800 -4.39274200 4.16330100  
 O 1.05612300 -4.43319400 4.20984800  
 O 4.53575500 -1.18364000 4.39877500  
 O 4.50370400 1.17040800 4.30762700  
 C 2.80427900 2.83737900 4.23249000  
 C 1.70046500 3.45922200 4.82773800  
 C 0.02349800 4.34829400 3.40436500  
 C -1.76231400 3.44799800 4.72494200  
 C -2.88468200 2.86223600 4.12572700  
 C -3.52841500 1.80852200 4.78471500  
 C -4.53184400 0.09858000 3.45801400  
 C -3.58919300 -1.61274000 4.82080300  
 C -2.98221000 -2.69920200 4.17976100  
 C -1.86578600 -3.29426200 4.77946400  
 C -0.10651000 -4.19955600 3.45144500  
 C 1.62732900 -3.35222900 4.84686800  
 C 2.78478900 -2.79369400 4.29075100  
 C 3.38938900 -1.71632800 4.94852800  
 C 4.37710100 -0.03809100 3.59671800  
 C 3.37562000 1.72861600 4.86952200  
 C 1.77680600 1.91093200 6.64395600  
 C 1.16798200 3.00871600 6.03611500  
 C -0.07762700 3.67725300 6.59599500  
 C -1.29909600 3.01611100 5.97315700  
 C -1.96491500 1.95467900 6.58529500  
 C -3.07634100 1.33232800 6.01765800  
 C -3.74866600 0.12062600 6.64605300  
 C -3.11276900 -1.12125200 6.03860900  
 C -2.00978800 -1.75685800 6.60835700  
 C -1.37534200 -2.84479400 6.00967100  
 C -0.15809900 -3.52079600 6.62248900  
 C 1.09958000 -2.88083800 6.05364000  
 C 1.73484500 -1.80280800 6.66922100  
 C 2.87383900 -1.19877800 6.13762200  
 C 3.51164500 0.03956800 6.74719300  
 C 2.87964700 1.26012600 6.09253600  
 C 3.36619100 3.38298200 2.97030800  
 C 3.34640400 2.66632700 1.76962700  
 C 3.87871000 3.21612200 0.61661700  
 C 4.43865500 4.48798300 0.62212600  
 C 4.45854900 5.21110100 1.80726700  
 C 3.92442200 4.65779100 2.96560900

C -0.11400200 3.71350800 8.12477000  
 C -3.73502500 0.13241700 8.17502400  
 C -0.18490000 -3.55063800 8.15199000  
 H 0.04122000 5.12168400 2.63652500  
 H -3.55592800 0.07336500 2.95324200  
 H -5.35502600 0.10535100 2.74441200  
 H -0.08118400 -3.17902500 3.04495500  
 H -0.10343300 -4.95179200 2.66162700  
 H 5.20540200 -0.04826100 2.88841800  
 H 3.40457300 -0.08012800 3.08718000  
 H 1.37632100 1.54944000 7.58591600  
 H -0.06540200 4.71172500 6.23832600  
 H -1.60594200 1.60157700 7.54688500  
 H -4.79302300 0.13322800 6.31901300  
 H -1.62981600 -1.39004200 7.55678300  
 H -0.16698400 -4.55740700 6.27094400  
 H 1.32370900 -1.41609700 7.59660200  
 H 4.56470800 0.03177100 6.44929300  
 H 2.89935600 1.68011400 1.71695700  
 H -0.11421100 2.71977500 8.58023800  
 H -2.72690500 0.11832600 8.59763200  
 H -4.26583700 -0.74299700 8.55772200  
 H -0.17670900 -2.55521800 8.60340600  
 H 0.68782300 -4.09068800 8.52786200  
 C -3.54861100 -3.21678900 2.90785500  
 C -4.82372700 -3.77420300 2.90353800  
 C -2.85056800 -3.15566800 1.69767100  
 C -5.39526300 -4.26726900 1.73584900  
 C -3.41825300 -3.64719300 0.53533900  
 H -1.86546400 -2.70607100 1.64519600  
 C -4.69051200 -4.20622900 0.54102500  
 C 3.39254000 -3.33588000 3.04866200  
 C 4.66092700 -3.90636000 3.10133500  
 C 2.74258400 -3.28561100 1.81131200  
 C 5.27184900 -4.42223300 1.96381000  
 C 3.34952900 -3.79956300 0.67892200  
 H 1.76431600 -2.82875800 1.71373700  
 C 4.61462600 -4.37130700 0.74178300  
 C -3.41806900 3.36091000 2.83217500  
 C -4.67427000 3.95774400 2.79103500  
 C -2.70265100 3.24290700 1.63630100  
 C -5.21070000 4.43528100 1.60033700  
 C -3.23566300 3.71875300 0.45132200  
 H -1.73084400 2.76270600 1.61451400  
 C -4.48902500 4.31800900 0.41979500  
 C 3.45867000 0.06506500 8.27548100  
 H 3.97447700 -0.81046200 8.67785100  
 H 3.95427400 0.96414200 8.65056400  
 H 2.44013100 0.05902100 8.67231800  
 H 0.76041400 4.24927400 8.50276700  
 H -4.23532600 1.03144000 8.54389900  
 H -1.08699100 -4.06221100 8.49717200  
 H 0.06383000 3.34046000 2.96860800  
 H -1.01417200 4.23267800 8.46364500  
 F 5.19584500 -4.86305200 -0.34799700  
 F 4.94795200 5.01400600 -0.48770800  
 F -4.99916900 4.77350400 -0.72062100  
 F -5.23404200 -4.67649600 -0.57754700  
 F 6.48152700 -4.96864700 2.04008200  
 F 2.73092400 -3.74923100 -0.50608000  
 F -2.75360300 -3.58673300 -0.62422300  
 F -6.61261600 -4.80157900 1.75695100

|   |             |             |             |
|---|-------------|-------------|-------------|
| F | -2.55476500 | 3.60436900  | -0.69498000 |
| F | -6.41062500 | 5.00809900  | 1.58538300  |
| F | 3.85846300  | 2.53365400  | -0.53399400 |
| F | 4.99275000  | 6.42852200  | 1.82823800  |
| F | 5.32310300  | -3.98627300 | 4.25579800  |
| F | 3.97341900  | 5.38259900  | 4.08369100  |
| F | -5.53085400 | -3.86245300 | 4.03035900  |
| F | -5.39599600 | 4.10021900  | 3.90296900  |

### 7-1in

|                                              |             |             |            |
|----------------------------------------------|-------------|-------------|------------|
| Zero-point correction=                       |             |             | 0.817431   |
| (Hartree/Particle)                           |             |             |            |
| Thermal correction to Energy=                |             | 0.885029    |            |
| Thermal correction to Enthalpy=              |             | 0.885973    |            |
| Thermal correction to Gibbs Free Energy=     |             | 0.711097    |            |
| Sum of electronic and zero-point Energies=   | -           |             |            |
| 4502.511902                                  |             |             |            |
| Sum of electronic and thermal Energies=      | -           |             |            |
| 4502.444304                                  |             |             |            |
| Sum of electronic and thermal Enthalpies=    | -           |             |            |
| 4502.443360                                  |             |             |            |
| Sum of electronic and thermal Free Energies= | -           |             |            |
| 4502.618236                                  |             |             |            |
| O                                            | 1.14394100  | 4.59160900  | 4.21012100 |
| O                                            | -1.20751500 | 4.55225800  | 4.10566000 |
| O                                            | -4.63272700 | 1.25429700  | 4.17442200 |
| O                                            | -4.63380400 | -1.09469400 | 4.20181600 |
| O                                            | -1.23617500 | -4.41981000 | 4.22804500 |
| O                                            | 1.11249900  | -4.50060900 | 4.34945900 |
| O                                            | 4.50154400  | -1.16336100 | 4.38241800 |
| O                                            | 4.47134700  | 1.18983600  | 4.29610400 |
| C                                            | 2.77479300  | 2.85943100  | 4.23078200 |
| C                                            | 1.67880200  | 3.48553800  | 4.83445300 |
| C                                            | 0.00464800  | 4.38027900  | 3.41114000 |
| C                                            | -1.77166800 | 3.45957500  | 4.72782700 |
| C                                            | -2.87966100 | 2.85869400  | 4.11823500 |
| C                                            | -3.51477100 | 1.79594400  | 4.77035400 |
| C                                            | -4.46545600 | 0.07105700  | 3.42996900 |
| C                                            | -3.51933500 | -1.62604600 | 4.81280800 |
| C                                            | -2.88874800 | -2.70799100 | 4.18876200 |
| C                                            | -1.79073400 | -3.30498400 | 4.81950400 |
| C                                            | -0.01824700 | -4.27852000 | 3.53832600 |
| C                                            | 1.66701800  | -3.39494500 | 4.95677800 |
| C                                            | 2.78937400  | -2.81425700 | 4.36050900 |
| C                                            | 3.37863000  | -1.70376200 | 4.97071600 |
| C                                            | 4.31665200  | -0.01549200 | 3.58596900 |
| C                                            | 3.35185700  | 1.75456200  | 4.86807400 |
| C                                            | 1.76569100  | 1.93913900  | 6.65270000 |
| C                                            | 1.15266600  | 3.03550500  | 6.04625600 |
| C                                            | -0.09596800 | 3.69877700  | 6.60626300 |
| C                                            | -1.31147900 | 3.03082800  | 5.97842300 |
| C                                            | -1.97002000 | 1.96168200  | 6.58492800 |
| C                                            | -3.06925400 | 1.32610300  | 6.00791500 |
| C                                            | -3.73406900 | 0.10768100  | 6.63169300 |
| C                                            | -3.07464200 | -1.12980700 | 6.04064900 |
| C                                            | -1.98292500 | -1.75993600 | 6.63774600 |
| C                                            | -1.33219900 | -2.85058800 | 6.06139500 |
| C                                            | -0.13169700 | -3.52110000 | 6.71548200 |
| C                                            | 1.13572700  | -2.89839100 | 6.15006400 |
| C                                            | 1.75852500  | -1.79186400 | 6.72812700 |
| C                                            | 2.87795800  | -1.17813100 | 6.16517900 |

|   |             |             |             |
|---|-------------|-------------|-------------|
| C | 3.51170800  | 0.07491800  | 6.75016600  |
| C | 2.86634700  | 1.28878900  | 6.09566800  |
| C | 3.31820500  | 3.38948500  | 2.95385400  |
| C | 3.26135000  | 2.66384400  | 1.75930600  |
| C | 3.77696200  | 3.19838900  | 0.59141400  |
| C | 4.35432000  | 4.46245700  | 0.57594200  |
| C | 4.40963500  | 5.19402700  | 1.75474600  |
| C | 3.89269900  | 4.65647100  | 2.92812600  |
| C | -0.13597800 | 3.73193700  | 8.13486700  |
| C | -3.74395600 | 0.12850000  | 8.16061100  |
| C | -0.18406300 | -3.51195300 | 8.24424600  |
| H | 0.02009500  | 5.16140700  | 2.65122800  |
| H | -3.48022200 | 0.06484800  | 2.94320200  |
| H | -5.27543800 | 0.06256900  | 2.70142700  |
| H | 0.04905700  | -3.28249600 | 3.08039700  |
| H | -0.01070900 | -5.07050500 | 2.78946800  |
| H | 5.12078900  | -0.02927400 | 2.85010100  |
| H | 3.32756100  | -0.05452000 | 3.11220600  |
| H | 1.37026400  | 1.57846600  | 7.59718700  |
| H | -0.08808200 | 4.73373200  | 6.24994200  |
| H | -1.61376600 | 1.61127800  | 7.54855100  |
| H | -4.77351100 | 0.10522300  | 6.28883300  |
| H | -1.62879300 | -1.38932700 | 7.59456300  |
| H | -0.14129200 | -4.56551300 | 6.38756900  |
| H | 1.35015900  | -1.38646900 | 7.64890500  |
| H | 4.56062300  | 0.07190200  | 6.43709500  |
| H | 2.79835200  | 1.68373900  | 1.72261200  |
| H | -0.13251400 | 2.73725200  | 8.58829100  |
| H | -2.74220600 | 0.13301100  | 8.59837100  |
| H | -4.26674700 | -0.75287200 | 8.54079300  |
| H | -0.16436300 | -2.50546100 | 8.67020100  |
| H | 0.67303700  | -4.05721000 | 8.64768300  |
| C | -3.40816100 | -3.22137900 | 2.89507800  |
| C | -4.66525100 | -3.81511400 | 2.84633100  |
| C | -2.67760700 | -3.11781200 | 1.70686800  |
| C | -5.18859000 | -4.30588800 | 1.65532300  |
| C | -3.19792700 | -3.60722100 | 0.52146900  |
| H | -1.70521200 | -2.63774200 | 1.69051300  |
| C | -4.45221700 | -4.20423400 | 0.48246900  |
| C | 3.33147700  | -3.35687600 | 3.08563500  |
| C | 4.24676400  | -4.41292200 | 3.06613000  |
| C | 2.92407500  | -2.81669700 | 1.87311400  |
| C | 4.72615500  | -4.89222400 | 1.86053300  |
| C | 3.40418500  | -3.29552000 | 0.65893100  |
| C | 4.31412600  | -4.34279600 | 0.65018500  |
| C | -3.40689700 | 3.34871800  | 2.81856700  |
| C | -4.66037800 | 3.95020700  | 2.76918000  |
| C | -2.68935500 | 3.21559800  | 1.62560900  |
| C | -5.19206900 | 4.41938700  | 1.57317700  |
| C | -3.21774200 | 3.68323000  | 0.43507900  |
| H | -1.72052600 | 2.72901500  | 1.61008700  |
| C | -4.46803600 | 4.28829400  | 0.39551000  |
| C | 3.48138900  | 0.11681900  | 8.27895200  |
| H | 4.00496600  | -0.75280900 | 8.68431900  |
| H | 3.97985100  | 1.02147100  | 8.63641100  |
| H | 2.46870700  | 0.11316800  | 8.69041700  |
| H | 0.73492400  | 4.27121500  | 8.51604900  |
| H | -4.26364300 | 1.02183800  | 8.51624500  |
| H | -1.10014800 | -3.99866900 | 8.58858900  |
| H | 0.04960200  | 3.37725600  | 2.96519200  |
| H | -1.03948200 | 4.24597600  | 8.47270900  |
| F | 4.77989200  | -4.80965400 | -0.50395500 |

|   |             |             |             |
|---|-------------|-------------|-------------|
| F | 4.84781700  | 4.97341000  | -0.54824000 |
| F | -4.97370300 | 4.73581600  | -0.75019400 |
| F | -4.94978600 | -4.67269400 | -0.65847300 |
| F | 5.60161500  | -5.90089600 | 1.82765100  |
| F | 2.99508900  | -2.75740300 | -0.48677400 |
| F | -2.50422400 | -3.50877600 | -0.61827300 |
| F | -6.38985000 | -4.87602200 | 1.63256700  |
| F | -2.53542200 | 3.55524700  | -0.70872400 |
| F | -6.38968200 | 4.99703400  | 1.55006900  |
| F | 3.72355600  | 2.50936400  | -0.55384000 |
| F | 4.96073800  | 6.40431800  | 1.75493300  |
| F | 3.97407100  | 5.38840600  | 4.03997500  |
| F | -5.40083100 | -3.94060900 | 3.95154700  |
| F | -5.38483000 | 4.10327900  | 3.87821900  |
| F | 2.03748200  | -1.80421700 | 1.83970000  |
| H | 4.58671400  | -4.86464100 | 3.99096700  |

### 7-2syn-in

|                                              |             |             |             |
|----------------------------------------------|-------------|-------------|-------------|
| Zero-point correction=                       |             |             | 0.818052    |
| (Hartree/Particle)                           |             |             |             |
| Thermal correction to Energy=                |             | 0.885358    |             |
| Thermal correction to Enthalpy=              |             | 0.886303    |             |
| Thermal correction to Gibbs Free Energy=     |             | 0.714323    |             |
| Sum of electronic and zero-point Energies=   |             | -           | 4502.513735 |
| Sum of electronic and thermal Energies=      |             | -           | 4502.446428 |
| Sum of electronic and thermal Enthalpies=    |             | -           | 4502.445484 |
| Sum of electronic and thermal Free Energies= |             | -           | 4502.617464 |
| O                                            | 1.09567200  | 4.40491300  | 3.98545500  |
| O                                            | -1.26806200 | 4.43424100  | 3.99481200  |
| O                                            | -4.78891600 | 1.23741500  | 4.28016200  |
| O                                            | -4.78793500 | -1.11107600 | 4.30922700  |
| O                                            | -1.26272300 | -4.30912900 | 4.10108900  |
| O                                            | 1.10109000  | -4.27546400 | 4.08966100  |
| O                                            | 4.62893000  | -1.10074300 | 4.50191000  |
| O                                            | 4.62756000  | 1.24564700  | 4.47402200  |
| C                                            | 2.84787000  | 2.81153000  | 4.22123800  |
| C                                            | 1.66210700  | 3.37850900  | 4.70874300  |
| C                                            | -0.09519200 | 4.12713900  | 3.27786700  |
| C                                            | -1.86766600 | 3.39535800  | 4.67239000  |
| C                                            | -3.01431300 | 2.81285000  | 4.11996800  |
| C                                            | -3.63902300 | 1.77274900  | 4.81811900  |
| C                                            | -4.66624500 | 0.05374400  | 3.52728800  |
| C                                            | -3.63744200 | -1.63187400 | 4.86007000  |
| C                                            | -3.01194500 | -2.68833200 | 4.18768200  |
| C                                            | -1.86406000 | -3.25526500 | 4.75353000  |
| C                                            | -0.09075900 | -4.01673600 | 3.37648300  |
| C                                            | 1.66626900  | -3.23129200 | 4.78808500  |
| C                                            | 2.85120700  | -2.67456600 | 4.28693900  |
| C                                            | 3.44891200  | -1.62230300 | 4.99017400  |
| C                                            | 4.54592000  | 0.06320900  | 3.71275800  |
| C                                            | 3.44684800  | 1.77726000  | 4.94955800  |
| C                                            | 1.74789500  | 1.93990300  | 6.62090400  |
| C                                            | 1.11948500  | 2.97958200  | 5.93486700  |
| C                                            | -0.12866100 | 3.66546500  | 6.47077700  |
| C                                            | -1.36756000 | 2.98461600  | 5.91104300  |
| C                                            | -2.01599900 | 1.93775600  | 6.56536000  |
| C                                            | -3.14562500 | 1.30991000  | 6.04098100  |

|   |             |             |            |
|---|-------------|-------------|------------|
| C | -3.78540600 | 0.09320200  | 6.69459100 |
| C | -3.14400500 | -1.13825500 | 6.07083900 |
| C | -2.01314200 | -1.75134600 | 6.60990900 |
| C | -1.36372400 | -2.81325500 | 5.98130200 |
| C | -0.12362300 | -3.47843100 | 6.55692900 |
| C | 1.12333000  | -2.80370300 | 6.00439600 |
| C | 1.75026700  | -1.74685000 | 6.66508000 |
| C | 2.90168000  | -1.13102500 | 6.17892200 |
| C | 3.51207500  | 0.09988300  | 6.83383100 |
| C | 2.90011800  | 1.31404600  | 6.14973800 |
| C | 3.49893800  | 3.32583600  | 2.98736100 |
| C | 2.89286000  | 3.20033300  | 1.74467400 |
| C | 3.48686800  | 3.68702000  | 0.58542400 |
| C | 4.72305500  | 4.31136600  | 0.65912400 |
| C | 5.34571100  | 4.43191700  | 1.89768600 |
| C | 4.75140100  | 3.94812800  | 3.04776200 |
| C | -0.14365700 | 3.78320200  | 7.99671700 |
| C | -3.72799800 | 0.11181200  | 8.22227000 |
| C | -0.13814200 | -3.55963300 | 8.08524800 |
| H | -0.08573500 | 4.79448600  | 2.41530100 |
| H | -3.71197300 | 0.04742900  | 2.98215200 |
| H | -5.51837900 | 0.04505100  | 2.84856400 |
| H | -0.10318400 | -2.97098400 | 3.05252900 |
| H | -0.08040900 | -4.70417100 | 2.52985300 |
| H | 5.43146600  | 0.05619100  | 3.07826800 |
| H | 3.61964200  | 0.05568200  | 3.12118600 |
| H | 1.31975700  | 1.60482100  | 7.56041900 |
| H | -0.12235800 | 4.68083100  | 6.06135900 |
| H | -1.62443500 | 1.59616100  | 7.51865800 |
| H | -4.83836500 | 0.08883300  | 6.39672400 |
| H | -1.62140700 | -1.38554800 | 7.55413300 |
| H | -0.11581500 | -4.50330400 | 6.17197700 |
| H | 1.32166600  | -1.38990400 | 7.59630400 |
| H | 4.57791700  | 0.09759900  | 6.58604700 |
| H | -0.16196300 | 2.81514600  | 8.50403400 |
| H | -2.70787100 | 0.11713500  | 8.61540800 |
| H | -4.23203400 | -0.77102500 | 8.62375800 |
| H | -0.15779700 | -2.57978200 | 8.56930400 |
| H | 0.75239700  | -4.08555100 | 8.43910300 |
| C | -3.58210200 | -3.19880300 | 2.91476000 |
| C | -4.84612600 | -3.78107200 | 2.91593600 |
| C | -2.89624000 | -3.10824400 | 1.69885300 |
| C | -5.42010100 | -4.26923800 | 1.74752400 |
| C | -3.46717300 | -3.59528200 | 0.53621300 |
| H | -1.91880600 | -2.64188900 | 1.64178700 |
| C | -4.72864800 | -4.17849600 | 0.54707700 |
| C | 3.50310900  | -3.21699800 | 3.06561000 |
| C | 4.75789200  | -3.83308800 | 3.14036900 |
| C | 2.89598500  | -3.12399200 | 1.82056200 |
| C | 5.35347100  | -4.34245000 | 2.00204300 |
| C | 3.49125000  | -3.63652900 | 0.67314600 |
| C | 4.72981100  | -4.25421500 | 0.76125400 |
| C | -3.58398800 | 3.28994600  | 2.83396600 |
| C | -4.84926800 | 3.86926800  | 2.81871500 |
| C | -2.89643100 | 3.16970300  | 1.62158000 |
| C | -5.42274700 | 4.32611500  | 1.63745100 |
| C | -3.46688700 | 3.62552500  | 0.44613800 |
| H | -1.91805200 | 2.70392700  | 1.57760400 |
| C | -4.72955400 | 4.20617800  | 0.44052400 |
| C | 3.38165600  | 0.11792000  | 8.35700600 |
| H | 3.86736500  | -0.76398600 | 8.78257000 |
| H | 3.86584100  | 1.01053100  | 8.76144500 |

|   |             |             |             |   |             |             |            |
|---|-------------|-------------|-------------|---|-------------|-------------|------------|
| H | 2.34406200  | 0.12108600  | 8.70083500  | C | 4.16799400  | 0.06109700  | 3.49534100 |
| H | 0.74600300  | 4.31878200  | 8.33806600  | C | 3.26858200  | 1.81613100  | 4.83011200 |
| H | -4.23299900 | 1.00361600  | 8.60215400  | C | 1.72345100  | 1.96416200  | 6.65247600 |
| H | -1.02283800 | -4.10873400 | 8.41746600  | C | 1.09775200  | 3.07322200  | 6.08319200 |
| H | -0.10533100 | 3.07402300  | 2.97864900  | C | -0.14336400 | 3.71471900  | 6.68711700 |
| H | -1.02927100 | 4.33873400  | 8.31553600  | C | -1.35673300 | 3.05909100  | 6.04324700 |
| F | 5.30771300  | -4.74716900 | -0.32994400 | C | -1.98945800 | 1.94434900  | 6.59030100 |
| F | 5.29963500  | 4.78019500  | -0.44334000 | C | -3.04506500 | 1.28658500  | 5.95752600 |
| F | -5.27501200 | 4.64246300  | -0.69125900 | C | -3.71590200 | 0.06067100  | 6.56167400 |
| F | -5.27449200 | -4.64477400 | -0.57250800 | C | -3.04032200 | -1.18428200 | 6.00896400 |
| F | 6.54956000  | -4.93649300 | 2.06538300  | C | -1.95798700 | -1.80345300 | 6.63418300 |
| F | 2.88134600  | -3.53097700 | -0.50489300 | C | -1.30526700 | -2.90882500 | 6.08926200 |
| F | -2.81705500 | -3.50862700 | -0.62965100 | C | -0.09572100 | -3.55008700 | 6.75595000 |
| F | -6.62679000 | -4.82830600 | 1.77364000  | C | 1.15356900  | -2.91916400 | 6.15986800 |
| F | -2.81510100 | 3.51019200  | -0.71631000 | C | 1.75942700  | -1.78564400 | 6.70031200 |
| F | -6.63069700 | 4.88295900  | 1.64765600  | C | 2.84498600  | -1.15044900 | 6.09587700 |
| F | 2.87802500  | 3.55061600  | -0.58998000 | C | 3.48147400  | 0.10579200  | 6.67160700 |
| F | 6.53950200  | 5.03184100  | 1.94719000  | C | 2.81134400  | 1.32606300  | 6.05777000 |
| F | 1.70997500  | -2.50955400 | 1.68117000  | C | 3.19850800  | 3.48974000  | 2.95237900 |
| H | 5.27424000  | -3.91426200 | 4.09004100  | C | 3.11461100  | 2.78837500  | 1.74497700 |
| H | 5.26682500  | 4.05442400  | 3.99545000  | C | 3.60930500  | 3.34475700  | 0.57826900 |
| F | 1.70908200  | 2.57844300  | 1.61983400  | C | 4.19203800  | 4.60648200  | 0.57703100 |
| F | -5.54400900 | 4.01655000  | 3.94748900  | C | 4.27430700  | 5.31369900  | 1.76896600 |
| F | -5.53915900 | -3.90116800 | 4.04899800  | C | 3.77853500  | 4.75439800  | 2.94118400 |

### 7-2anti-in

Zero-point correction= 0.817635  
(Hartree/Particle)

Thermal correction to Energy= 0.885201

Thermal correction to Enthalpy= 0.886145

Thermal correction to Gibbs Free Energy= 0.711264

Sum of electronic and zero-point Energies= -  
4502.513993

Sum of electronic and thermal Energies= -  
4502.446428

Sum of electronic and thermal Enthalpies= -  
4502.445483

Sum of electronic and thermal Free Energies= -  
4502.620364

|   |             |             |            |   |             |             |            |
|---|-------------|-------------|------------|---|-------------|-------------|------------|
| O | 1.06606300  | 4.67916200  | 4.28492000 | H | -0.08764900 | 5.35096100  | 2.79444700 |
| O | -1.28115700 | 4.66636700  | 4.24843200 | H | -3.29844900 | -0.05094000 | 2.94480700 |
| O | -4.52334500 | 1.19408200  | 4.04582400 | H | -5.06782200 | -0.03266300 | 2.56439700 |
| O | -4.55764800 | -1.15905200 | 4.14214700 | H | 0.05861700  | -3.43738100 | 3.08360100 |
| O | -1.20326500 | -4.52822900 | 4.29980200 | H | 0.02113900  | -5.23829700 | 2.88862600 |
| O | 1.14557000  | -4.57320600 | 4.40987700 | H | 4.92419100  | 0.06076300  | 2.70974600 |
| O | 4.40240500  | -1.10658700 | 4.25225200 | H | 3.15251400  | 0.03337100  | 3.08472600 |
| O | 4.36731600  | 1.25187800  | 4.21967300 | H | 1.34950300  | 1.58342300  | 7.59783600 |
| C | 2.68011600  | 2.93489700  | 4.22916300 | H | -0.14279000 | 4.76222200  | 6.36987800 |
| C | 1.59838100  | 3.55016400  | 4.86915000 | H | -1.64738900 | 1.57173200  | 7.55076200 |
| C | -0.09399400 | 4.52330000  | 3.50287800 | H | -4.74372200 | 0.05069700  | 6.18485100 |
| C | -1.82006800 | 3.52923800  | 4.81076500 | H | -1.61067500 | -1.40953300 | 7.58432800 |
| C | -2.86974200 | 2.89795300  | 4.13631200 | H | -0.09271800 | -4.60263500 | 6.45571600 |
| C | -3.45840100 | 1.76353600  | 4.70846800 | H | 1.36650300  | -1.37604600 | 7.62584000 |
| C | -4.31506200 | -0.01793300 | 3.35232600 | H | 4.52009200  | 0.11507500  | 6.32566000 |
| C | -3.46985900 | -1.70426000 | 4.78720200 | H | -0.16958800 | 2.67423400  | 8.62824200 |
| C | -2.84075600 | -2.80484000 | 4.19704400 | H | -2.79429300 | 0.08651300  | 8.56288400 |
| C | -1.75674600 | -3.39467800 | 4.85613500 | H | -4.32366900 | -0.78483400 | 8.45401600 |
| C | 0.00806500  | -4.40838400 | 3.59468500 | H | -0.13037000 | -2.48106700 | 8.68168000 |
| C | 1.67662400  | -3.43090500 | 4.96942800 | H | 0.73080200  | -4.01985100 | 8.69614500 |
| C | 2.76055400  | -2.82599000 | 4.32672300 | C | -3.34043700 | -3.33868700 | 2.90317800 |
| C | 3.32073800  | -1.67411200 | 4.88973400 | C | -4.56055600 | -4.00424100 | 2.86026000 |
|   |             |             |            | C | -2.62792100 | -3.18002500 | 1.71032900 |
|   |             |             |            | C | -5.06472100 | -4.51566200 | 1.66987300 |
|   |             |             |            | C | -3.12922200 | -3.69009700 | 0.52499300 |
|   |             |             |            | C | -4.34563000 | -4.36114500 | 0.49199000 |
|   |             |             |            | C | 3.30721100  | -3.40837300 | 3.07187200 |
|   |             |             |            | C | 4.09163800  | -4.56581900 | 3.08991200 |
|   |             |             |            | C | 3.03861800  | -2.81715600 | 1.84473300 |
|   |             |             |            | C | 4.58766600  | -5.08697500 | 1.90908300 |
|   |             |             |            | C | 3.53643000  | -3.33750400 | 0.65513000 |
|   |             |             |            | C | 4.32009400  | -4.48178900 | 0.68495800 |
|   |             |             |            | C | -3.36503200 | 3.44850200  | 2.84647500 |
|   |             |             |            | C | -4.09692400 | 4.63950900  | 2.80122300 |
|   |             |             |            | C | -3.10116000 | 2.79536900  | 1.65018300 |



|   |             |             |             |
|---|-------------|-------------|-------------|
| C | -4.54918200 | 5.13175800  | 1.59098000  |
| C | -3.55526400 | 3.28695100  | 0.43118100  |
| C | -4.28804400 | 4.46422100  | 0.39837800  |
| C | 3.50154100  | 0.12877300  | 8.20133800  |
| H | 4.03876000  | -0.74497300 | 8.57913200  |
| H | 4.01093300  | 1.02992600  | 8.55222200  |
| H | 2.50303400  | 0.11978100  | 8.64600400  |
| H | 0.71172500  | 4.20220900  | 8.61068800  |
| H | -4.30323200 | 0.98997500  | 8.42402100  |
| H | -1.04335800 | -3.99013100 | 8.64841900  |
| H | -0.08206600 | 3.54983800  | 2.99296100  |
| H | -1.06293700 | 4.19437900  | 8.58314700  |
| F | 4.80193500  | -4.98823900 | -0.44594300 |
| F | 4.66543900  | 5.13836300  | -0.54638300 |
| F | -4.72727200 | 4.94288200  | -0.76188700 |
| F | -4.82481400 | -4.84947000 | -0.64863700 |
| F | 5.34114800  | -6.19075600 | 1.91415900  |
| F | 3.26185700  | -2.74732200 | -0.50509100 |
| F | -2.45367900 | -3.54141000 | -0.61977900 |
| F | -6.23091800 | -5.15479300 | 1.65199800  |
| F | -3.28678200 | 2.63742400  | -0.69891000 |
| F | -5.25284200 | 6.26700700  | 1.53614100  |
| F | 3.53027800  | 2.68028300  | -0.57988300 |
| F | 4.83113900  | 6.52168200  | 1.78274700  |
| F | 2.26705200  | -1.71798100 | 1.77012600  |
| H | 4.31593700  | -5.06414600 | 4.02609200  |
| H | -4.31372000 | 5.18694000  | 3.71138800  |
| F | -2.37676900 | 1.66381600  | 1.63494300  |
| H | -1.68776200 | -2.63935900 | 1.69020800  |
| H | 2.64588600  | 1.81142100  | 1.69751200  |
| F | -5.27965400 | -4.17625300 | 3.97077800  |
| F | 3.88646400  | 5.46299200  | 4.06611900  |

### 7-3in

|                                              |             |             |            |
|----------------------------------------------|-------------|-------------|------------|
| Zero-point correction=                       | 0.817972    |             |            |
| (Hartree/Particle)                           |             |             |            |
| Thermal correction to Energy=                | 0.885369    |             |            |
| Thermal correction to Enthalpy=              | 0.886313    |             |            |
| Thermal correction to Gibbs Free Energy=     | 0.713527    |             |            |
| Sum of electronic and zero-point Energies=   | -           |             |            |
| 4502.515275                                  |             |             |            |
| Sum of electronic and thermal Energies=      | -           |             |            |
| 4502.447878                                  |             |             |            |
| Sum of electronic and thermal Enthalpies=    | -           |             |            |
| 4502.446934                                  |             |             |            |
| Sum of electronic and thermal Free Energies= | -           |             |            |
| 4502.619721                                  |             |             |            |
| O                                            | 1.02724700  | 4.44143700  | 4.02581700 |
| O                                            | -1.32984600 | 4.50144400  | 4.09522200 |
| O                                            | -4.74595200 | 1.18976600  | 4.22084300 |
| O                                            | -4.76450100 | -1.16086700 | 4.29528900 |
| O                                            | -1.23734600 | -4.36078800 | 4.11989500 |
| O                                            | 1.12565800  | -4.30187500 | 4.09851300 |
| O                                            | 4.60158100  | -1.06438800 | 4.46106200 |
| O                                            | 4.56584500  | 1.28201300  | 4.43510200 |
| C                                            | 2.77398700  | 2.84018400  | 4.21887200 |
| C                                            | 1.59298900  | 3.40026000  | 4.72744500 |
| C                                            | -0.18162400 | 4.20844200  | 3.33092900 |
| C                                            | -1.91295500 | 3.43429500  | 4.74240700 |
| C                                            | -3.02260200 | 2.82523900  | 4.15022600 |
| C                                            | -3.62160400 | 1.73901700  | 4.79694300 |

|   |             |             |            |
|---|-------------|-------------|------------|
| C | -4.60707300 | -0.01254500 | 3.49506600 |
| C | -3.62138100 | -1.68710700 | 4.85579600 |
| C | -2.99315800 | -2.74672500 | 4.19209000 |
| C | -1.84476300 | -3.30543500 | 4.76407900 |
| C | -0.07160000 | -4.06392500 | 3.38676200 |
| C | 1.67957100  | -3.24461200 | 4.78621000 |
| C | 2.85167400  | -2.67217500 | 4.27298400 |
| C | 3.43731700  | -1.60576500 | 4.96511400 |
| C | 4.48589000  | 0.09896700  | 3.67451200 |
| C | 3.38785000  | 1.80231800  | 4.92971800 |
| C | 1.71472900  | 1.94661300  | 6.62749300 |
| C | 1.07214600  | 2.99011000  | 5.96060400 |
| C | -0.16610400 | 3.66800700  | 6.53163400 |
| C | -1.40883500 | 2.99833900  | 5.96897300 |
| C | -2.04102900 | 1.91954400  | 6.58646800 |
| C | -3.14523500 | 1.27442400  | 6.02870300 |
| C | -3.78373400 | 0.05045500  | 6.67105500 |
| C | -3.13144500 | -1.18188900 | 6.06206200 |
| C | -1.99932200 | -1.78622700 | 6.60847600 |
| C | -1.34609500 | -2.85075900 | 5.98828700 |
| C | -0.09917600 | -3.50193600 | 6.56531000 |
| C | 1.13827800  | -2.81742900 | 6.00357500 |
| C | 1.75528400  | -1.74930100 | 6.65504400 |
| C | 2.89385000  | -1.11907800 | 6.15727800 |
| C | 3.49533400  | 0.11891300  | 6.80658100 |
| C | 2.86196900  | 1.32862400  | 6.13480500 |
| C | 3.41227400  | 3.37389800  | 2.98659800 |
| C | 2.78678200  | 3.28552200  | 1.75018100 |
| C | 3.37063800  | 3.79437900  | 0.59504400 |
| C | 4.61502900  | 4.40236100  | 0.66582700 |
| C | 5.25668300  | 4.48537300  | 1.89767300 |
| C | 4.67298100  | 3.98012500  | 3.04376700 |
| C | -0.16265400 | 3.74893600  | 8.05976000 |
| C | -3.75047000 | 0.06940400  | 8.19977200 |
| C | -0.10858700 | -3.57312900 | 8.09408100 |
| H | -0.17854900 | 4.91843600  | 2.50402800 |
| H | -3.63715700 | -0.03715100 | 2.98356400 |
| H | -5.43796500 | -0.02332200 | 2.79023400 |
| H | -0.09669800 | -3.02225400 | 3.05129800 |
| H | -0.05710900 | -4.76073300 | 2.54798000 |
| H | 5.35881900  | 0.10510000  | 3.02271600 |
| H | 3.54834700  | 0.07834500  | 3.10157600 |
| H | 1.30426100  | 1.60454600  | 7.57225800 |
| H | -0.16249400 | 4.69226700  | 6.14500600 |
| H | -1.65536500 | 1.56372800  | 7.53702000 |
| H | -4.83234700 | 0.03988300  | 6.35778400 |
| H | -1.60847200 | -1.41011500 | 7.54913000 |
| H | -0.08281900 | -4.52903600 | 6.18677800 |
| H | 1.32877400  | -1.39430000 | 7.58796100 |
| H | 4.55813100  | 0.13043300  | 6.54612900 |
| H | -0.18945000 | 2.76916200  | 8.54368400 |
| H | -2.73672400 | 0.06924400  | 8.60898000 |
| H | -4.26446700 | -0.81171200 | 8.59224000 |
| H | -0.13754200 | -2.59033200 | 8.57168500 |
| H | 0.78851600  | -4.08704900 | 8.44905000 |
| C | -3.55916600 | -3.26450000 | 2.92025600 |
| C | -4.81725800 | -3.85913000 | 2.92500500 |
| C | -2.87740500 | -3.16590800 | 1.70271100 |
| C | -5.38885500 | -4.35465300 | 1.75875400 |
| C | -3.44602900 | -3.66055600 | 0.54201000 |
| H | -1.90747800 | -2.68448700 | 1.64190600 |
| C | -4.70081100 | -4.25797500 | 0.55682800 |

|   |             |             |             |
|---|-------------|-------------|-------------|
| C | 3.50553100  | -3.21309900 | 3.05192700  |
| C | 4.76940300  | -3.81045300 | 3.12638800  |
| C | 2.89243400  | -3.13801700 | 1.80859600  |
| C | 5.36826500  | -4.31950600 | 1.98974500  |
| C | 3.49119900  | -3.65033700 | 0.66276600  |
| C | 4.73887200  | -4.24932500 | 0.75074500  |
| C | -3.55165300 | 3.32972700  | 2.85459300  |
| C | -4.35192000 | 4.47426300  | 2.79124300  |
| C | -3.24717100 | 2.67281400  | 1.66971700  |
| C | -4.82710100 | 4.92185200  | 1.57224500  |
| C | -3.72440700 | 3.11996300  | 0.44220400  |
| C | -4.52250500 | 4.25349200  | 0.39056700  |
| C | 3.38370400  | 0.13087500  | 8.33142900  |
| H | 3.88629700  | -0.74579200 | 8.74812000  |
| H | 3.86096800  | 1.02872600  | 8.73258300  |
| H | 2.35050900  | 0.11906500  | 8.68814500  |
| H | 0.73729800  | 4.26435600  | 8.40522400  |
| H | -4.25724400 | 0.96313300  | 8.57303300  |
| H | -0.98643700 | -4.12947900 | 8.43237700  |
| H | -0.22287400 | 3.17283100  | 2.97811000  |
| H | -1.03749800 | 4.30808200  | 8.40137700  |
| F | 5.31994200  | -4.74201300 | -0.33904800 |
| F | 5.18113200  | 4.89210800  | -0.43333200 |
| F | -4.98404200 | 4.68965100  | -0.77788800 |
| F | -5.24432700 | -4.73178800 | -0.56094700 |
| F | 6.57309700  | -4.89599400 | 2.05312100  |
| F | 2.87570300  | -3.56275100 | -0.51377800 |
| F | -2.80065300 | -3.56822100 | -0.62571900 |
| F | -6.58996300 | -4.92614200 | 1.78809100  |
| F | -3.41827400 | 2.46986900  | -0.67746600 |
| F | -5.59514100 | 6.01355600  | 1.49840900  |
| F | 2.74360100  | 3.69519800  | -0.57471700 |
| F | 6.45824100  | 5.07065700  | 1.94472500  |
| F | 1.69734200  | -2.54246400 | 1.66908900  |
| H | 5.29021400  | -3.87717600 | 4.07475300  |
| H | 5.20312500  | 4.05680200  | 3.98617800  |
| H | -4.60517000 | 5.01973700  | 3.69309400  |
| F | 1.59525100  | 2.68165600  | 1.62721600  |
| F | -2.46604900 | 1.57995000  | 1.67633900  |
| F | -5.50718600 | -3.98252600 | 4.06014200  |

### 7-4in

|                                              |             |             |            |
|----------------------------------------------|-------------|-------------|------------|
| Zero-point correction=                       | 0.818034    |             |            |
| (Hartree/Particle)                           |             |             |            |
| Thermal correction to Energy=                | 0.885408    |             |            |
| Thermal correction to Enthalpy=              | 0.886352    |             |            |
| Thermal correction to Gibbs Free Energy=     | 0.713686    |             |            |
| Sum of electronic and zero-point Energies=   | -           |             |            |
| 4502.516325                                  |             |             |            |
| Sum of electronic and thermal Energies=      | -           |             |            |
| 4502.448951                                  |             |             |            |
| Sum of electronic and thermal Enthalpies=    | -           |             |            |
| 4502.448007                                  |             |             |            |
| Sum of electronic and thermal Free Energies= | -           |             |            |
| 4502.620673                                  |             |             |            |
| O                                            | 1.20326400  | 4.62499300  | 4.23027000 |
| O                                            | -1.15020600 | 4.60174000  | 4.07218100 |
| O                                            | -4.63432800 | 1.35085400  | 4.14485500 |
| O                                            | -4.61280000 | -1.00665400 | 4.06466400 |
| O                                            | -1.36696900 | -4.49004600 | 4.28226800 |
| O                                            | 0.99127700  | -4.47052300 | 4.22009400 |

|   |             |             |            |
|---|-------------|-------------|------------|
| O | 4.47242300  | -1.21742800 | 4.35994700 |
| O | 4.45284900  | 1.13782400  | 4.22097600 |
| C | 2.82659200  | 2.87440700  | 4.22123700 |
| C | 1.73469600  | 3.50368200  | 4.82970300 |
| C | 0.07999500  | 4.40650100  | 3.40511900 |
| C | -1.74100000 | 3.52588900  | 4.69872700 |
| C | -2.88374700 | 2.97329300  | 4.10401200 |
| C | -3.51979100 | 1.90126000  | 4.73966000 |
| C | -4.40712600 | 0.20079500  | 3.35998200 |
| C | -3.54436900 | -1.57855900 | 4.72065800 |
| C | -2.98884600 | -2.74161900 | 4.16955700 |
| C | -1.92227700 | -3.35636900 | 4.83491600 |
| C | -0.21065000 | -4.28843500 | 3.49953000 |
| C | 1.55797500  | -3.38105900 | 4.84534900 |
| C | 2.72571000  | -2.84358000 | 4.28619400 |
| C | 3.33461300  | -1.75533500 | 4.92127700 |
| C | 4.27639200  | -0.08708000 | 3.53868700 |
| C | 3.35912400  | 1.72416500  | 4.82012200 |
| C | 1.77570100  | 1.91372000  | 6.61020800 |
| C | 1.18801200  | 3.03273500  | 6.02418100 |
| C | -0.05499500 | 3.70674500  | 6.58129700 |
| C | -1.27868900 | 3.06775100  | 5.93913200 |
| C | -1.94898600 | 1.99916200  | 6.53512300 |
| C | -3.06181200 | 1.39299300  | 5.95608600 |
| C | -3.74153000 | 0.16803100  | 6.54518900 |
| C | -3.09656900 | -1.07579000 | 5.94904100 |
| C | -2.03368000 | -1.72656800 | 6.57610200 |
| C | -1.42352500 | -2.85824100 | 6.03936900 |
| C | -0.20387600 | -3.51817200 | 6.66094900 |
| C | 1.04495300  | -2.89325100 | 6.05415200 |
| C | 1.69051800  | -1.81034800 | 6.65162100 |
| C | 2.82674300  | -1.21796300 | 6.10474200 |
| C | 3.48248900  | 0.02077700  | 6.69185700 |
| C | 2.86249100  | 1.24957500  | 6.04096700 |
| C | 3.43109600  | 3.46249200  | 2.99661600 |
| C | 3.39482200  | 2.79697800  | 1.77879600 |
| C | 3.96463300  | 3.33740500  | 0.63095400 |
| C | 4.58217000  | 4.57770500  | 0.69047900 |
| C | 4.61348000  | 5.25902500  | 1.90313200 |
| C | 4.04760200  | 4.71838300  | 3.04207800 |
| C | -0.10530500 | 3.72201300  | 8.11025900 |
| C | -3.77265100 | 0.16624200  | 8.07476000 |
| C | -0.21502600 | -3.49811700 | 8.19069100 |
| H | 0.11461100  | 5.17771200  | 2.63589400 |
| H | -3.39549600 | 0.22973600  | 2.94263200 |
| H | -5.16823200 | 0.21094300  | 2.58006100 |
| H | -0.23627600 | -3.29109000 | 3.04890700 |
| H | -0.21453700 | -5.07478100 | 2.74501800 |
| H | 5.06829400  | -0.11511300 | 2.79053500 |
| H | 3.28243700  | -0.12783700 | 3.08182900 |
| H | 1.37042500  | 1.54164600  | 7.54605600 |
| H | -0.02960600 | 4.74578900  | 6.23827800 |
| H | -1.58670900 | 1.62346300  | 7.48703000 |
| H | -4.77703200 | 0.18237400  | 6.19096100 |
| H | -1.66596000 | -1.33291000 | 7.51862700 |
| H | -0.21554400 | -4.56491400 | 6.34140100 |
| H | 1.28915900  | -1.41201800 | 7.57831900 |
| H | 4.53151300  | -0.00124200 | 6.38043300 |
| H | -0.11121600 | 2.72214700  | 8.55199000 |
| H | -2.77744300 | 0.17381900  | 8.52682500 |
| H | -4.29358700 | -0.72386200 | 8.43700900 |
| H | -0.22620300 | -2.48831800 | 8.60910200 |

|   |             |             |             |
|---|-------------|-------------|-------------|
| H | 0.67182600  | -4.00658400 | 8.57777200  |
| C | -3.54294600 | -3.35653900 | 2.93430200  |
| C | -4.16602800 | -4.60903300 | 2.98208400  |
| C | -3.45124400 | -2.71959500 | 1.70415800  |
| C | -4.68442100 | -5.17417400 | 1.83245200  |
| C | -3.97327600 | -3.28461600 | 0.54553100  |
| C | -4.59806900 | -4.52119500 | 0.60690200  |
| C | 3.35217000  | -3.43871800 | 3.07608500  |
| C | 4.60592000  | -4.05602200 | 3.15623000  |
| C | 2.72530600  | -3.39259600 | 1.83825700  |
| C | 5.18204600  | -4.61314000 | 2.03040100  |
| C | 3.30137800  | -3.95374600 | 0.70356500  |
| C | 4.53909200  | -4.57215800 | 0.79721900  |
| C | -3.45395100 | 3.53470700  | 2.85073200  |
| C | -4.70358600 | 4.16502600  | 2.85706600  |
| C | -2.77558000 | 3.44171200  | 1.64297100  |
| C | -5.22586400 | 4.68899400  | 1.68975300  |
| C | -3.29752000 | 3.96910200  | 0.46671100  |
| C | -4.53183400 | 4.60104700  | 0.48705400  |
| C | 3.45125200  | 0.05854200  | 8.22099100  |
| H | 3.96739600  | -0.81723800 | 8.62273000  |
| H | 3.95687900  | 0.95747300  | 8.58314700  |
| H | 2.43841600  | 0.06054100  | 8.63216000  |
| H | 0.76740900  | 4.24989300  | 8.50332300  |
| H | -4.30383700 | 1.05130400  | 8.43436300  |
| H | -1.10324000 | -4.01698200 | 8.56037000  |
| H | 0.12429200  | 3.40038100  | 2.97595400  |
| H | -1.00692200 | 4.23869200  | 8.44943200  |
| F | 5.09761700  | -5.11229900 | -0.28216600 |
| F | 5.13061200  | 5.10227400  | -0.40169100 |
| F | -5.03881100 | 5.10966800  | -0.63239300 |
| F | -5.10136600 | -5.06904700 | -0.49552700 |
| F | 6.37712900  | -5.20956200 | 2.09911000  |
| F | 2.67314900  | -3.89557300 | -0.46815600 |
| F | -3.87184000 | -2.64699900 | -0.61815800 |
| F | -5.28625000 | -6.36791100 | 1.87009000  |
| F | -2.62090800 | 3.86616400  | -0.67458700 |
| F | -6.41661300 | 5.29779200  | 1.68766000  |
| F | 3.91579400  | 2.67255600  | -0.52080300 |
| F | 5.20943000  | 6.45578300  | 1.93902100  |
| F | 1.53992100  | -2.78151700 | 1.69375100  |
| H | 5.13665900  | -4.10105400 | 4.10037600  |
| H | 4.08509700  | 5.27860000  | 3.96936300  |
| H | -5.27329700 | 4.24625500  | 3.77573500  |
| H | -4.24597700 | -5.14740400 | 3.91957400  |
| F | 2.78520100  | 1.60733400  | 1.66686400  |
| F | -1.59091700 | 2.81646200  | 1.57005000  |
| F | -2.83229200 | -1.53480000 | 1.59147400  |

### 1-TS

|                                            |          |
|--------------------------------------------|----------|
| Zero-point correction=                     | 0.948290 |
| (Hartree/Particle)                         |          |
| Thermal correction to Energy=              | 1.000211 |
| Thermal correction to Enthalpy=            | 1.001155 |
| Thermal correction to Gibbs Free Energy=   | 0.864245 |
| Sum of electronic and zero-point Energies= | -        |
| 2915.084862                                |          |
| Sum of electronic and thermal Energies=    | -        |
| 2915.032941                                |          |
| Sum of electronic and thermal Enthalpies=  | -        |
| 2915.031997                                |          |

|                                              |             |             |            |
|----------------------------------------------|-------------|-------------|------------|
| Sum of electronic and thermal Free Energies= | -           |             |            |
| 2915.168907                                  |             |             |            |
| O                                            | 1.07975500  | 4.44876100  | 4.05424800 |
| O                                            | -1.25922800 | 4.59932600  | 4.14655700 |
| O                                            | -4.68478600 | 1.17070800  | 4.11884200 |
| O                                            | -4.51342300 | -1.16516800 | 3.98757000 |
| O                                            | -1.17699400 | -4.54810000 | 4.32707700 |
| O                                            | 1.17075300  | -4.49127800 | 4.38193600 |
| O                                            | 4.55785400  | -1.14851600 | 4.54664600 |
| O                                            | 4.52913200  | 1.19299800  | 4.46524900 |
| C                                            | 2.76180300  | 2.77437000  | 4.21367000 |
| C                                            | 1.60759900  | 3.37275500  | 4.73838400 |
| C                                            | -0.12922300 | 4.27310100  | 3.36612000 |
| C                                            | -1.94959500 | 3.54017300  | 4.70045900 |
| C                                            | -3.11050100 | 3.02416700  | 4.06576300 |
| C                                            | -3.62937100 | 1.85669300  | 4.68577800 |
| C                                            | -4.35178700 | 0.05685500  | 3.31894600 |
| C                                            | -3.43131200 | -1.68977000 | 4.66438100 |
| C                                            | -2.80919500 | -2.81963100 | 4.11532200 |
| C                                            | -1.76731800 | -3.41200400 | 4.84059600 |
| C                                            | 0.01175500  | -4.36649400 | 3.59404900 |
| C                                            | 1.68189600  | -3.36185500 | 4.98669200 |
| C                                            | 2.82418100  | -2.77839200 | 4.42239000 |
| C                                            | 3.40104100  | -1.68241900 | 5.07589500 |
| C                                            | 4.43274000  | -0.00658300 | 3.73299500 |
| C                                            | 3.35944000  | 1.74164600  | 4.94841400 |
| C                                            | 1.68228700  | 1.92635300  | 6.64332100 |
| C                                            | 1.06119200  | 2.97413700  | 5.96372100 |
| C                                            | -0.18088900 | 3.67171000  | 6.50151400 |
| C                                            | -1.42931400 | 3.03822200  | 5.89887100 |
| C                                            | -2.04225400 | 1.93735700  | 6.48294900 |
| C                                            | -3.13380500 | 1.32438900  | 5.88170900 |
| C                                            | -3.76045600 | 0.06090700  | 6.45998300 |
| C                                            | -3.04546900 | -1.16267200 | 5.90265500 |
| C                                            | -1.98822000 | -1.77864800 | 6.57232600 |
| C                                            | -1.33427900 | -2.90126100 | 6.06643800 |
| C                                            | -0.12782700 | -3.52946300 | 6.74753200 |
| C                                            | 1.12891200  | -2.88318800 | 6.18084100 |
| C                                            | 1.73008000  | -1.77834500 | 6.78257400 |
| C                                            | 2.86286900  | -1.15996700 | 6.25573500 |
| C                                            | 3.46159600  | 0.10090500  | 6.86221300 |
| C                                            | 2.82912300  | 1.29587300  | 6.16270200 |
| C                                            | 3.35303500  | 3.22556300  | 2.92410700 |
| C                                            | 2.63164100  | 3.12298200  | 1.73087400 |
| C                                            | 3.18773500  | 3.54461300  | 0.52472400 |
| C                                            | 4.47595400  | 4.07497500  | 0.49894500 |
| C                                            | 5.20554500  | 4.17401500  | 1.68331200 |
| C                                            | 4.64972000  | 3.74855800  | 2.88683900 |
| C                                            | -0.22764000 | 3.73114700  | 8.03076800 |
| C                                            | -3.82841600 | 0.07868200  | 7.98935200 |
| C                                            | -0.20153500 | -3.49058900 | 8.27492600 |
| H                                            | -0.10209300 | 4.98871600  | 2.54147400 |
| H                                            | -3.32397500 | 0.16632200  | 2.94966500 |
| H                                            | -5.07026700 | 0.03606900  | 2.49666500 |
| H                                            | -0.00939500 | -3.38968700 | 3.09390500 |
| H                                            | 0.05373100  | -5.18453800 | 2.87519700 |
| H                                            | 5.29276200  | -0.01912800 | 3.06429800 |
| H                                            | 3.48716300  | -0.03689200 | 3.17522700 |
| H                                            | 1.26133600  | 1.59467800  | 7.58726600 |
| H                                            | -0.14030000 | 4.70143100  | 6.13598300 |
| H                                            | -1.64194000 | 1.53028900  | 7.40601900 |
| H                                            | -4.78754500 | 0.01675600  | 6.08775800 |

|   |             |             |             |
|---|-------------|-------------|-------------|
| H | -1.66538200 | -1.37135400 | 7.52538100  |
| H | -0.10507900 | -4.57976500 | 6.44069500  |
| H | 1.29766200  | -1.38346000 | 7.69661200  |
| H | 4.52313600  | 0.10578000  | 6.59631800  |
| H | -0.28520900 | 2.74619700  | 8.50118200  |
| H | -2.84659400 | 0.13600000  | 8.46625200  |
| H | -4.31828300 | -0.82968000 | 8.35031300  |
| H | -0.24300400 | -2.47565600 | 8.67890300  |
| H | 0.67671100  | -3.98066100 | 8.70353500  |
| C | -3.23634900 | -3.38702600 | 2.80698000  |
| C | -3.73458800 | -4.69170900 | 2.73176200  |
| C | -3.13038800 | -2.63602500 | 1.63231200  |
| C | -4.13302800 | -5.22650100 | 1.50954200  |
| C | -3.52537400 | -3.17076300 | 0.40754500  |
| C | -4.03142900 | -4.46738500 | 0.34407200  |
| C | 3.42701800  | -3.30914400 | 3.16783100  |
| C | 4.66763100  | -3.95282900 | 3.20098300  |
| C | 2.77400100  | -3.15991000 | 1.94115800  |
| C | 5.23573100  | -4.45128900 | 2.03171700  |
| C | 3.34225600  | -3.65670300 | 0.76904800  |
| C | 4.57350900  | -4.30700900 | 0.81273800  |
| C | -3.74291300 | 3.66687900  | 2.84873200  |
| C | -3.23704500 | 4.85263200  | 2.26954500  |
| C | -4.91728000 | 3.15976100  | 2.24809300  |
| C | -3.82011600 | 5.44268800  | 1.15101600  |
| C | -5.49759300 | 3.75243300  | 1.12951400  |
| C | -4.94828200 | 4.89219000  | 0.55470400  |
| C | 3.35873100  | 0.15740800  | 8.38704700  |
| H | 3.86248700  | -0.70776000 | 8.82626000  |
| H | 3.83843400  | 1.06661300  | 8.75914300  |
| H | 2.32743600  | 0.15700300  | 8.74968400  |
| H | 0.66937600  | 4.22702000  | 8.41136400  |
| H | -4.40705600 | 0.94392100  | 8.32325300  |
| H | -1.09670400 | -4.01723900 | 8.61624500  |
| H | -0.22285800 | 3.24280700  | 2.99928000  |
| H | -1.10422100 | 4.30015000  | 8.35140800  |
| H | 5.18451900  | -4.05698700 | 4.15026000  |
| H | 5.21965200  | 3.81640500  | 3.80838600  |
| H | -2.39446300 | 5.35797100  | 2.70662400  |
| H | -3.80427100 | -5.28467100 | 3.63853800  |
| H | -5.42281600 | 2.30896700  | 2.66828900  |
| H | -5.39864700 | 5.35029300  | -0.32011000 |
| H | 1.63386200  | 2.69269400  | 1.74492900  |
| H | 4.91083900  | 4.40560200  | -0.43899200 |
| H | 1.82239100  | -2.63626600 | 1.90220700  |
| H | 5.01733000  | -4.69573300 | -0.09834800 |
| H | -2.71850800 | -1.63136100 | 1.67534700  |
| H | -4.34132900 | -4.88580000 | -0.60831800 |
| H | 6.19795000  | -4.95225000 | 2.07197000  |
| H | -4.52229900 | -6.23894800 | 1.46696700  |
| H | 6.21121300  | 4.58255900  | 1.67013000  |
| H | -3.38142200 | 6.35384700  | 0.75558000  |
| H | 2.61582200  | 3.45494400  | -0.39368500 |
| H | 2.82393600  | -3.53199000 | -0.17667500 |
| H | -3.43425600 | -2.57535400 | -0.49568900 |
| H | -6.40031700 | 3.31201100  | 0.71700900  |

## 2-TS

|                               |          |
|-------------------------------|----------|
| Zero-point correction=        | 0.915474 |
| (Hartree/Particle)            |          |
| Thermal correction to Energy= | 0.970727 |

|                                              |             |             |            |
|----------------------------------------------|-------------|-------------|------------|
| Thermal correction to Enthalpy=              | 0.971672    |             |            |
| Thermal correction to Gibbs Free Energy=     | 0.827144    |             |            |
| Sum of electronic and zero-point Energies=   | -           |             |            |
| 3311.964851                                  |             |             |            |
| Sum of electronic and thermal Energies=      | -           |             |            |
| 3311.909598                                  |             |             |            |
| Sum of electronic and thermal Enthalpies=    | -           |             |            |
| 3311.908654                                  |             |             |            |
| Sum of electronic and thermal Free Energies= | -           |             |            |
| 3312.053181                                  |             |             |            |
| O                                            | 1.08112300  | 4.44363100  | 4.04225400 |
| O                                            | -1.25888600 | 4.59863000  | 4.13557600 |
| O                                            | -4.69242700 | 1.18035700  | 4.11560500 |
| O                                            | -4.52473200 | -1.15700900 | 3.98229500 |
| O                                            | -1.18715800 | -4.54298300 | 4.31015200 |
| O                                            | 1.16286700  | -4.48208800 | 4.35437700 |
| O                                            | 4.56483500  | -1.15064700 | 4.54647600 |
| O                                            | 4.53487500  | 1.19139400  | 4.46309400 |
| O                                            | 2.76737000  | 2.77278900  | 4.20641400 |
| C                                            | 1.61009200  | 3.36901300  | 4.72806800 |
| C                                            | -0.12919100 | 4.26708900  | 3.35696900 |
| C                                            | -1.95100500 | 3.54251300  | 4.69451200 |
| C                                            | -3.11679800 | 3.03187100  | 4.06512300 |
| C                                            | -3.63468900 | 1.86339100  | 4.68332900 |
| C                                            | -4.36200700 | 0.06591100  | 3.31576600 |
| C                                            | -3.44220300 | -1.68521200 | 4.65593400 |
| C                                            | -2.82503300 | -2.81756200 | 4.10532600 |
| C                                            | -1.77907600 | -3.40855900 | 4.82657200 |
| C                                            | -0.00120600 | -4.35414200 | 3.57483400 |
| C                                            | 1.67809900  | -3.35703200 | 4.96420100 |
| C                                            | 2.82906400  | -2.77999400 | 4.40829500 |
| C                                            | 3.40399200  | -1.68499100 | 5.06725000 |
| C                                            | 4.44426200  | -0.00902300 | 3.73156100 |
| C                                            | 3.36254400  | 1.73878300  | 4.94217700 |
| C                                            | 1.68180400  | 1.92289200  | 6.62332700 |
| C                                            | 1.06203800  | 2.97057600  | 5.95261800 |
| C                                            | -0.17837400 | 3.67044700  | 6.49102900 |
| C                                            | -1.42847900 | 3.03849900  | 5.89071800 |
| C                                            | -2.04228800 | 1.93852900  | 6.47578500 |
| C                                            | -3.13625400 | 1.32794500  | 5.87634500 |
| C                                            | -3.76359800 | 0.06466800  | 6.45398300 |
| C                                            | -3.05112100 | -1.15860400 | 5.89279600 |
| C                                            | -1.99234900 | -1.77552300 | 6.55898100 |
| C                                            | -1.34081100 | -2.89811700 | 6.05015400 |
| C                                            | -0.13245800 | -3.52789400 | 6.72570400 |
| C                                            | 1.12310000  | -2.87989100 | 6.15820100 |
| C                                            | 1.72483500  | -1.77851900 | 6.76522300 |
| C                                            | 2.86105200  | -1.16208200 | 6.24423700 |
| C                                            | 3.45931500  | 0.09676300  | 6.85518800 |
| C                                            | 2.82923800  | 1.29227300  | 6.15470200 |
| C                                            | 3.36884200  | 3.23209600  | 2.92518000 |
| C                                            | 2.64852300  | 3.17178800  | 1.72849800 |
| C                                            | 3.20784200  | 3.60263200  | 0.52762800 |
| C                                            | 4.50260100  | 4.09546500  | 0.54718700 |
| C                                            | 5.25389900  | 4.16507900  | 1.71059700 |
| C                                            | 4.67801700  | 3.72593900  | 2.89875700 |
| C                                            | -0.22336300 | 3.73143000  | 8.02030400 |
| C                                            | -3.82803300 | 0.07984600  | 7.98352800 |
| C                                            | -0.20242800 | -3.49383100 | 8.25346400 |
| H                                            | -0.10155600 | 4.97919600  | 2.52906400 |
| H                                            | -3.33383600 | 0.17456600  | 2.94642100 |
| H                                            | -5.08136800 | 0.04681500  | 2.49396300 |

|   |             |             |             |
|---|-------------|-------------|-------------|
| H | -0.02846700 | -3.37258800 | 3.08374000  |
| H | 0.03978200  | -5.16648500 | 2.84912900  |
| H | 5.30885500  | -0.02113700 | 3.06867100  |
| H | 3.50208000  | -0.04069000 | 3.16803100  |
| H | 1.25985200  | 1.59214000  | 7.57707800  |
| H | -0.13655300 | 4.69987700  | 6.12482900  |
| H | -1.64114200 | 1.53064500  | 7.39805800  |
| H | -4.79166900 | 0.02241800  | 6.08430200  |
| H | -1.66651400 | -1.36913800 | 7.51136000  |
| H | -0.11015900 | -4.57735800 | 6.41620600  |
| H | 1.29078100  | -1.38574000 | 7.67929400  |
| H | 4.52173900  | 0.10135100  | 6.59314800  |
| H | -0.28282500 | 2.74717900  | 8.49186800  |
| H | -2.84519400 | 0.13553000  | 8.45844200  |
| H | -4.31810400 | -0.82853100 | 8.34399800  |
| H | -0.24569300 | -2.48044200 | 8.66100900  |
| H | 0.67786700  | -3.98324800 | 8.67845000  |
| C | -3.26456400 | -3.39352100 | 2.80555200  |
| C | -3.73055000 | -4.71154400 | 2.74064600  |
| C | -3.20693700 | -2.64212700 | 1.62786600  |
| C | -4.14535500 | -5.26597500 | 1.53366400  |
| C | -3.61408200 | -3.17934100 | 0.40866400  |
| C | -4.07978200 | -4.48408800 | 0.39025900  |
| C | 3.45187500  | -3.32171000 | 3.16921900  |
| C | 4.73544600  | -3.87681700 | 3.21641700  |
| C | 2.78272300  | -3.27659400 | 1.94306700  |
| C | 5.33530200  | -4.39236500 | 2.07175000  |
| C | 3.36660200  | -3.78504000 | 0.78439500  |
| C | 4.63353800  | -4.33750100 | 0.87685500  |
| C | -3.75512000 | 3.68131900  | 2.85660300  |
| C | -3.25171600 | 4.87107400  | 2.28257400  |
| C | -4.93632900 | 3.18073400  | 2.26315200  |
| C | -3.83604000 | 5.47815500  | 1.17508400  |
| C | -5.53274800 | 3.77550300  | 1.15539700  |
| C | -4.96414200 | 4.91191200  | 0.61254100  |
| C | 3.35110800  | 0.15086700  | 8.37971700  |
| H | 3.85346000  | -0.71490100 | 8.81921400  |
| H | 3.82980500  | 1.05926600  | 8.75490100  |
| H | 2.31870400  | 0.14995200  | 8.73908400  |
| H | 0.67503600  | 4.22578600  | 8.39944900  |
| H | -4.40526300 | 0.94491200  | 8.32009900  |
| H | -1.09535400 | -4.02399900 | 8.59501500  |
| H | -0.22514600 | 3.23485500  | 2.99544300  |
| H | -1.09818200 | 4.30289200  | 8.34116400  |
| H | 5.26821800  | -3.90136200 | 4.16176900  |
| H | 5.24986400  | 3.76305700  | 3.82034800  |
| H | -2.40431400 | 5.37127800  | 2.71663000  |
| H | -3.76469800 | -5.30761300 | 3.64690900  |
| H | -5.43988400 | 2.32798700  | 2.68210500  |
| H | 1.64124400  | 2.76550700  | 1.72881400  |
| H | 1.79839100  | -2.82139300 | 1.88511900  |
| H | -2.82131700 | -1.62725600 | 1.65718100  |
| H | 2.66301400  | 3.55771700  | -0.40863900 |
| H | 6.26477500  | 4.55534800  | 1.67448500  |
| H | 2.86104200  | -3.75468100 | -0.17422200 |
| H | 6.32700700  | -4.83007500 | 2.09239400  |
| H | -3.57173800 | -2.60960300 | -0.51281600 |
| H | -4.51346700 | -6.28363900 | 1.46783100  |
| H | -3.42496200 | 6.39189600  | 0.76046500  |
| H | -6.44026400 | 3.36616400  | 0.72565700  |
| F | -5.52937800 | 5.48761100  | -0.46484900 |
| F | 5.05362200  | 4.51746300  | -0.60818500 |

|   |             |             |             |
|---|-------------|-------------|-------------|
| F | 5.20778100  | -4.83428000 | -0.23687400 |
| F | -4.47764600 | -5.01432600 | -0.78310500 |

### 3-TS

|                                              |             |             |            |
|----------------------------------------------|-------------|-------------|------------|
| Zero-point correction=                       |             |             | 0.915266   |
| (Hartree/Particle)                           |             |             |            |
| Thermal correction to Energy=                |             | 0.970597    |            |
| Thermal correction to Enthalpy=              |             | 0.971542    |            |
| Thermal correction to Gibbs Free Energy=     |             | 0.825966    |            |
| Sum of electronic and zero-point Energies=   |             |             | -          |
| 3311.965277                                  |             |             |            |
| Sum of electronic and thermal Energies=      |             |             | -          |
| 3311.909946                                  |             |             |            |
| Sum of electronic and thermal Enthalpies=    |             |             | -          |
| 3311.909001                                  |             |             |            |
| Sum of electronic and thermal Free Energies= |             |             | -          |
| 3312.054577                                  |             |             |            |
| O                                            | 1.04863100  | 4.51635000  | 4.07205800 |
| O                                            | -1.29300300 | 4.63261100  | 4.16561700 |
| O                                            | -4.64755100 | 1.13721600  | 4.08158900 |
| O                                            | -4.44781300 | -1.19795100 | 3.95813900 |
| O                                            | -1.12780800 | -4.58417700 | 4.36996500 |
| O                                            | 1.21315700  | -4.56655600 | 4.48662300 |
| O                                            | 4.48571500  | -1.10977800 | 4.42512200 |
| O                                            | 4.49226200  | 1.24033700  | 4.40472600 |
| C                                            | 2.73917600  | 2.84768800  | 4.20008700 |
| C                                            | 1.58552200  | 3.43459700  | 4.73874100 |
| C                                            | -0.15881400 | 4.33890600  | 3.37928800 |
| C                                            | -1.96348000 | 3.55384600  | 4.70533500 |
| C                                            | -3.11010700 | 3.02016800  | 4.06069100 |
| C                                            | -3.61209900 | 1.83760300  | 4.66536800 |
| C                                            | -4.28909300 | 0.02456300  | 3.28874700 |
| C                                            | -3.37288200 | -1.71259100 | 4.65245600 |
| C                                            | -2.74148200 | -2.84626800 | 4.12220200 |
| C                                            | -1.70779000 | -3.43407400 | 4.86271100 |
| C                                            | 0.08035500  | -4.45279800 | 3.65810700 |
| C                                            | 1.71345600  | -3.40822400 | 5.04349200 |
| C                                            | 2.80909600  | -2.79994300 | 4.41929300 |
| C                                            | 3.35970000  | -1.65345800 | 5.00663700 |
| C                                            | 4.34577900  | 0.05856600  | 3.65264200 |
| C                                            | 3.33866700  | 1.80069400  | 4.91224500 |
| C                                            | 1.67371700  | 1.95791400  | 6.62078100 |
| C                                            | 1.04620200  | 3.01394700  | 5.96020000 |
| C                                            | -0.20049000 | 3.69315500  | 6.51069200 |
| C                                            | -1.44048400 | 3.04972900  | 5.90151500 |
| C                                            | -2.04094500 | 1.93648600  | 6.47511300 |
| C                                            | -3.11918800 | 1.30958900  | 5.86397200 |
| C                                            | -3.73769300 | 0.04039600  | 6.43760400 |
| C                                            | -3.00574700 | -1.17820500 | 5.89274300 |
| C                                            | -1.95609400 | -1.78807300 | 6.57961900 |
| C                                            | -1.29281600 | -2.91312000 | 6.09181700 |
| C                                            | -0.09576500 | -3.53117300 | 6.80048400 |
| C                                            | 1.16128700  | -2.89752500 | 6.22208100 |
| C                                            | 1.74855800  | -1.76047000 | 6.77482800 |
| C                                            | 2.85020300  | -1.12783600 | 6.20005900 |
| C                                            | 3.46101800  | 0.13319900  | 6.79466700 |
| C                                            | 2.81726700  | 1.33587000  | 6.12177600 |
| C                                            | 3.33185100  | 3.32721100  | 2.92147100 |
| C                                            | 2.60106700  | 3.26104600  | 1.73207900 |
| C                                            | 3.18214200  | 3.71878200  | 0.55995600 |
| C                                            | 4.46486000  | 4.23930500  | 0.51331100 |

|   |             |             |             |
|---|-------------|-------------|-------------|
| C | 5.18934900  | 4.29416100  | 1.70329000  |
| C | 4.63313600  | 3.84064500  | 2.89638700  |
| C | -0.24331400 | 3.73383600  | 8.04050700  |
| C | -3.82356900 | 0.06238800  | 7.96608500  |
| C | -0.17730500 | -3.45240500 | 8.32559800  |
| H | -0.14067200 | 5.07187200  | 2.57003700  |
| H | -3.25661300 | 0.14470600  | 2.93602100  |
| H | -4.99470900 | -0.00504700 | 2.45593100  |
| H | 0.09973300  | -3.49864300 | 3.11444100  |
| H | 0.12071600  | -5.30275600 | 2.97782500  |
| H | 5.17382100  | 0.04494900  | 2.94436700  |
| H | 3.37503200  | 0.06541000  | 3.14008000  |
| H | 1.25869500  | 1.61052800  | 7.56177800  |
| H | -0.17279500 | 4.72731200  | 6.15685100  |
| H | -1.64158700 | 1.53111100  | 7.39935500  |
| H | -4.76006600 | -0.01510000 | 6.05378200  |
| H | -1.64966700 | -1.37598000 | 7.53590700  |
| H | -0.07436800 | -4.58854400 | 6.51912900  |
| H | 1.33068600  | -1.35021400 | 7.68884900  |
| H | 4.51602700  | 0.13732000  | 6.50360800  |
| H | -0.28669200 | 2.74286900  | 8.49962800  |
| H | -2.84806600 | 0.13234900  | 8.45421500  |
| H | -4.30769900 | -0.85002200 | 8.32442300  |
| H | -0.20438600 | -2.42701600 | 8.70356000  |
| H | 0.69145900  | -3.94464400 | 8.77061900  |
| C | -3.16270200 | -3.42888200 | 2.81853500  |
| C | -3.67754100 | -4.72803800 | 2.75667300  |
| C | -3.03774100 | -2.68613800 | 1.64138500  |
| C | -4.07506700 | -5.27092500 | 1.53762500  |
| C | -3.43926800 | -3.25458400 | 0.44272200  |
| C | -3.96069000 | -4.53505200 | 0.35883300  |
| C | 3.38054500  | -3.37774600 | 3.17071000  |
| C | 4.07175700  | -4.59256500 | 3.20843800  |
| C | 3.22235900  | -2.71628200 | 1.95035000  |
| C | 4.60970100  | -5.13292600 | 2.04332200  |
| C | 3.76860500  | -3.27980400 | 0.80699700  |
| C | 4.46477200  | -4.47703700 | 0.82137500  |
| C | -3.75042600 | 3.66268300  | 2.84983200  |
| C | -3.26859200 | 4.86321500  | 2.28001700  |
| C | -4.91154600 | 3.12997900  | 2.25032500  |
| C | -3.87019600 | 5.45052000  | 1.16992900  |
| C | -5.48306500 | 3.73963700  | 1.14730800  |
| C | -4.98997200 | 4.89153700  | 0.56512000  |
| C | 3.39772600  | 0.18321800  | 8.32222100  |
| H | 3.90090800  | -0.69026900 | 8.74519600  |
| H | 3.89935700  | 1.08437200  | 8.68462000  |
| H | 2.37631500  | 0.19624200  | 8.71146600  |
| H | 0.64825300  | 4.23692100  | 8.42427600  |
| H | -4.41575300 | 0.92210600  | 8.29014900  |
| H | -1.08156300 | -3.95676900 | 8.67637300  |
| H | -0.23846100 | 3.31537100  | 2.99066600  |
| H | -1.12598600 | 4.28783500  | 8.37038100  |
| F | 3.60907900  | -2.63314700 | -0.36558400 |
| F | -3.31057700 | -2.52806400 | -0.68624200 |
| F | -6.59062200 | 3.17024300  | 0.62474000  |
| F | 2.46528500  | 3.64854800  | -0.58047900 |
| H | 4.18127500  | -5.11032100 | 4.15565900  |
| H | 5.20543000  | 3.87856600  | 3.81718800  |
| H | -2.43506900 | 5.38143300  | 2.71757600  |
| H | -3.76089200 | -5.30879600 | 3.66918400  |
| H | -5.42116700 | 2.26525100  | 2.63686400  |
| H | -5.47378200 | 5.32621900  | -0.30177600 |

|   |             |             |             |
|---|-------------|-------------|-------------|
| H | 1.59946200  | 2.84529700  | 1.70007700  |
| H | 4.87267200  | 4.58368100  | -0.43018500 |
| H | 2.67018000  | -1.78509500 | 1.87383500  |
| H | 4.87214200  | -4.87421300 | -0.10134500 |
| H | -2.61871300 | -1.68522000 | 1.64070700  |
| H | -4.26098600 | -4.93240400 | -0.60398400 |
| H | 5.14724800  | -6.07469100 | 2.08348900  |
| H | -4.47794500 | -6.27783800 | 1.50166600  |
| H | 6.19790700  | 4.69443600  | 1.69661900  |
| H | -3.45271100 | 6.37216500  | 0.77749400  |

#### 4-TS

|                                              |             |             |            |
|----------------------------------------------|-------------|-------------|------------|
| Zero-point correction=                       |             |             | 0.882096   |
| (Hartree/Particle)                           |             |             |            |
| Thermal correction to Energy=                |             | 0.940947    |            |
| Thermal correction to Enthalpy=              |             | 0.941891    |            |
| Thermal correction to Gibbs Free Energy=     |             | 0.787548    |            |
| Sum of electronic and zero-point Energies=   |             |             | -          |
| 3708.840931                                  |             |             |            |
| Sum of electronic and thermal Energies=      |             |             | -          |
| 3708.782081                                  |             |             |            |
| Sum of electronic and thermal Enthalpies=    |             |             | -          |
| 3708.781137                                  |             |             |            |
| Sum of electronic and thermal Free Energies= |             |             | -          |
| 3708.935480                                  |             |             |            |
| O                                            | 1.06867600  | 4.47413500  | 4.06174400 |
| O                                            | -1.27250700 | 4.60990100  | 4.14683200 |
| O                                            | -4.66082900 | 1.14887900  | 4.08881100 |
| O                                            | -4.47177500 | -1.18701800 | 3.96547900 |
| O                                            | -1.13756100 | -4.55962200 | 4.33857800 |
| O                                            | 1.20689700  | -4.53235500 | 4.44404600 |
| O                                            | 4.53355400  | -1.13839100 | 4.50592100 |
| O                                            | 4.50688700  | 1.20727200  | 4.43440100 |
| C                                            | 2.74318000  | 2.79385800  | 4.20979900 |
| C                                            | 1.59368400  | 3.39420400  | 4.73978200 |
| C                                            | -0.13661900 | 4.30524600  | 3.36448600 |
| C                                            | -1.94948500 | 3.54113300  | 4.69601600 |
| C                                            | -3.10235000 | 3.01327400  | 4.05797400 |
| C                                            | -3.61627900 | 1.83890000  | 4.66757400 |
| C                                            | -4.31795400 | 0.03383100  | 3.29230500 |
| C                                            | -3.39257200 | -1.70003900 | 4.65374800 |
| C                                            | -2.75750200 | -2.82642000 | 4.11481700 |
| C                                            | -1.72094600 | -3.41860200 | 4.84627400 |
| C                                            | 0.06817000  | -4.40970400 | 3.62600500 |
| C                                            | 1.70631900  | -3.39050000 | 5.03318100 |
| C                                            | 2.82573700  | -2.79152200 | 4.44680500 |
| C                                            | 3.39260300  | -1.67284200 | 5.06538200 |
| C                                            | 4.39754500  | 0.00898700  | 3.70194500 |
| C                                            | 3.34501300  | 1.75670100  | 4.93268600 |
| C                                            | 1.67925000  | 1.94026800  | 6.63835500 |
| C                                            | 1.05320500  | 2.98972000  | 5.96560200 |
| C                                            | -0.19101800 | 3.68039100  | 6.50644200 |
| C                                            | -1.43234900 | 3.04069600  | 5.89611700 |
| C                                            | -2.04211500 | 1.93476200  | 6.47434800 |
| C                                            | -3.12515100 | 1.31196400  | 5.86727400 |
| C                                            | -3.74853000 | 0.04702700  | 6.44528100 |
| C                                            | -3.02177900 | -1.17257900 | 5.89582700 |
| C                                            | -1.97016500 | -1.78681900 | 6.57609500 |
| C                                            | -1.30594900 | -2.90759200 | 6.07915700 |
| C                                            | -0.11044400 | -3.53402300 | 6.78230700 |
| C                                            | 1.15074000  | -2.89561100 | 6.21796800 |

|   |             |             |             |
|---|-------------|-------------|-------------|
| C | 1.74520700  | -1.77440100 | 6.79646500  |
| C | 2.86465400  | -1.14773000 | 6.24952000  |
| C | 3.46465500  | 0.11770500  | 6.84498900  |
| C | 2.82298100  | 1.30977700  | 6.14976200  |
| C | 3.32672500  | 3.25233000  | 2.91902500  |
| C | 2.61364400  | 3.08952500  | 1.72781000  |
| C | 3.18264500  | 3.52846200  | 0.54184000  |
| C | 4.43268400  | 4.12266600  | 0.47908400  |
| C | 5.11087300  | 4.25959500  | 1.68185900  |
| C | 4.59486400  | 3.83858400  | 2.89690400  |
| C | -0.24087100 | 3.73209200  | 8.03564000  |
| C | -3.82782200 | 0.06921000  | 7.97393400  |
| C | -0.19791800 | -3.47641900 | 8.30808200  |
| H | -0.11054800 | 5.03759400  | 2.55522600  |
| H | -3.29037600 | 0.14946000  | 2.92422000  |
| H | -5.03576200 | 0.00591500  | 2.47018300  |
| H | 0.07739800  | -3.44524600 | 3.10060000  |
| H | 0.11103500  | -5.24640900 | 2.92970300  |
| H | 5.24692700  | -0.00352600 | 3.01996200  |
| H | 3.44266500  | -0.01605200 | 3.15966400  |
| H | 1.26496000  | 1.60740000  | 7.58483500  |
| H | -0.15542300 | 4.71183800  | 6.14511200  |
| H | -1.64618400 | 1.53173800  | 7.40108000  |
| H | -4.77253300 | -0.00428500 | 6.06520000  |
| H | -1.66256800 | -1.38167800 | 7.53499700  |
| H | -0.08846700 | -4.58773300 | 6.48697300  |
| H | 1.31729500  | -1.37149500 | 7.70918400  |
| H | 4.52349300  | 0.12445500  | 6.56789100  |
| H | -0.29221300 | 2.74467100  | 8.50155900  |
| H | -2.85001000 | 0.13365300  | 8.45813000  |
| H | -4.31551700 | -0.84053400 | 8.33398600  |
| H | -0.22972100 | -2.45642100 | 8.69999600  |
| H | 0.67032900  | -3.97240700 | 8.74969300  |
| C | -3.17631600 | -3.39402700 | 2.80358300  |
| C | -3.73743600 | -4.67220100 | 2.74357800  |
| C | -2.99926100 | -2.65508200 | 1.63025500  |
| C | -4.11978200 | -5.17233700 | 1.50921200  |
| C | -3.39918300 | -3.20905800 | 0.42354700  |
| C | -3.96761600 | -4.46855000 | 0.32307000  |
| C | 3.40420100  | -3.33318500 | 3.18432400  |
| C | 4.43258900  | -4.27570200 | 3.23479600  |
| C | 2.91579400  | -2.89291800 | 1.95121300  |
| C | 4.94820700  | -4.75765200 | 2.04195200  |
| C | 3.47195200  | -3.41198900 | 0.79050600  |
| C | 4.49251900  | -4.34887200 | 0.79660400  |
| C | -3.73974200 | 3.65795700  | 2.84845400  |
| C | -3.23795200 | 4.85055700  | 2.28440500  |
| C | -4.90750000 | 3.13720000  | 2.25070600  |
| C | -3.85149800 | 5.42320700  | 1.18340900  |
| C | -5.47438200 | 3.75795500  | 1.15078900  |
| C | -4.97509000 | 4.90656200  | 0.56454700  |
| C | 3.37853000  | 0.17888700  | 8.37070400  |
| H | 3.88745300  | -0.68452800 | 8.80703700  |
| H | 3.86267400  | 1.08903400  | 8.73421800  |
| H | 2.35139800  | 0.17990500  | 8.74489300  |
| H | 0.65170000  | 4.23280000  | 8.41996700  |
| H | -4.41418700 | 0.93177800  | 8.30076500  |
| H | -1.10193400 | -3.98840300 | 8.64801500  |
| H | -0.22295400 | 3.28182700  | 2.97716700  |
| H | -1.12154900 | 4.29378700  | 8.35749100  |
| F | 5.93833100  | -5.66510000 | 2.08633100  |
| F | 3.00108100  | -2.98711200 | -0.39522400 |

|   |             |             |             |
|---|-------------|-------------|-------------|
| F | -3.22458400 | -2.49411900 | -0.70225100 |
| F | -4.66432400 | -6.39997600 | 1.45078700  |
| F | -6.58607500 | 3.20764000  | 0.62598000  |
| F | -3.31991500 | 6.55868200  | 0.69126400  |
| F | 2.49250100  | 3.36754900  | -0.60140200 |
| F | 6.32869600  | 4.82846700  | 1.66019700  |
| H | 4.82815200  | -4.62998200 | 4.17959200  |
| H | 5.17457300  | 3.96343500  | 3.80404200  |
| H | -2.40090100 | 5.38307600  | 2.69849600  |
| H | -3.87234300 | -5.27164300 | 3.63633200  |
| H | -5.42649300 | 2.27894300  | 2.63744200  |
| H | -5.43496700 | 5.37166800  | -0.29804100 |
| H | 1.63868400  | 2.61528000  | 1.70768100  |
| H | 4.85884900  | 4.45906700  | -0.45779700 |
| H | 2.11986200  | -2.15862900 | 1.88382800  |
| H | 4.91269400  | -4.74108600 | -0.12110000 |
| H | -2.54317800 | -1.67131200 | 1.63994100  |
| H | -4.27351300 | -4.88283200 | -0.62947000 |

## 5-TS

|                                              |             |             |            |
|----------------------------------------------|-------------|-------------|------------|
| Zero-point correction=                       |             |             | 0.851151   |
| (Hartree/Particle)                           |             |             |            |
| Thermal correction to Energy=                |             | 0.913469    |            |
| Thermal correction to Enthalpy=              |             | 0.914413    |            |
| Thermal correction to Gibbs Free Energy=     |             | 0.755691    |            |
| Sum of electronic and zero-point Energies=   |             |             | -          |
| 4105.646481                                  |             |             |            |
| Sum of electronic and thermal Energies=      |             |             | -          |
| 4105.584163                                  |             |             |            |
| Sum of electronic and thermal Enthalpies=    |             |             | -          |
| 4105.583219                                  |             |             |            |
| Sum of electronic and thermal Free Energies= |             |             | -          |
| 4105.741941                                  |             |             |            |
| O                                            | 1.03722600  | 4.35184000  | 3.89703000 |
| O                                            | -1.29272400 | 4.54747400  | 4.09043900 |
| O                                            | -4.73927400 | 1.14574700  | 4.16141500 |
| O                                            | -4.52189400 | -1.18238600 | 3.93188700 |
| O                                            | -1.15850500 | -4.53749700 | 4.25672300 |
| O                                            | 1.19797700  | -4.44874000 | 4.26508500 |
| O                                            | 4.61522100  | -1.14321100 | 4.55060300 |
| O                                            | 4.55854300  | 1.20013700  | 4.45048100 |
| O                                            | 2.76972100  | 2.75185500  | 4.15674200 |
| C                                            | 1.58258600  | 3.32490800  | 4.63642700 |
| C                                            | -0.20958500 | 4.13521300  | 3.28049600 |
| C                                            | -2.02603300 | 3.53359600  | 4.67451000 |
| C                                            | -3.23192800 | 3.04410300  | 4.08716600 |
| C                                            | -3.70533100 | 1.85661200  | 4.70492200 |
| C                                            | -4.38956200 | 0.08017000  | 3.31142600 |
| C                                            | -3.44657600 | -1.69867800 | 4.61743000 |
| C                                            | -2.83569900 | -2.84339000 | 4.08375600 |
| C                                            | -1.76976600 | -3.41943700 | 4.78449600 |
| C                                            | 0.01246300  | -4.30014000 | 3.50893200 |
| C                                            | 1.71263400  | -3.34634900 | 4.91185200 |
| C                                            | 2.88831100  | -2.78073500 | 4.39764300 |
| C                                            | 3.44944800  | -1.68067800 | 5.05707100 |
| C                                            | 4.49389800  | -0.00732000 | 3.72652000 |
| C                                            | 3.37144300  | 1.73450900  | 4.90764100 |
| C                                            | 1.66536100  | 1.91796600  | 6.57020100 |
| C                                            | 1.03341000  | 2.94425100  | 5.86664200 |
| C                                            | -0.19970900 | 3.65463500  | 6.41015100 |
| C                                            | -1.47126700 | 3.02531300  | 5.85337800 |

|   |             |             |            |
|---|-------------|-------------|------------|
| C | -2.06700700 | 1.92778100  | 6.46085400 |
| C | -3.16688300 | 1.31644300  | 5.88070800 |
| C | -3.76719200 | 0.03447600  | 6.44277400 |
| C | -3.04686800 | -1.17115500 | 5.85311200 |
| C | -1.97981600 | -1.78399300 | 6.51120400 |
| C | -1.32270700 | -2.90109400 | 5.99999700 |
| C | -0.10876100 | -3.52827400 | 6.66489000 |
| C | 1.14438400  | -2.87402600 | 6.10134300 |
| C | 1.73969900  | -1.77540500 | 6.72057800 |
| C | 2.88155300  | -1.15435000 | 6.22030700 |
| C | 3.45827800  | 0.11181000  | 6.83583800 |
| C | 2.82499000  | 1.29334700  | 6.11566200 |
| C | 3.41909000  | 3.24926400  | 2.91655500 |
| C | 2.75860600  | 3.22139600  | 1.69345200 |
| C | 3.34346500  | 3.70214900  | 0.52872700 |
| C | 4.62974700  | 4.21903400  | 0.58552200 |
| C | 5.32837000  | 4.25391700  | 1.78247000 |
| C | 4.71932500  | 3.76810800  | 2.93450600 |
| C | -0.21481400 | 3.74549500  | 7.93925800 |
| C | -3.81124600 | 0.02487500  | 7.97330800 |
| C | -0.17427100 | -3.50659800 | 8.19336500 |
| H | -0.21181600 | 4.77864700  | 2.39825200 |
| H | -3.36845300 | 0.21607800  | 2.94045200 |
| H | -5.11892000 | 0.07706400  | 2.50113700 |
| H | -0.02844400 | -3.30311700 | 3.05874500 |
| H | 0.05562200  | -5.08391200 | 2.75282000 |
| H | 5.37040200  | -0.01326600 | 3.07937000 |
| H | 3.56057900  | -0.05422700 | 3.14880100 |
| H | 1.24112600  | 1.60072800  | 7.51747400 |
| H | -0.15743900 | 4.67727000  | 6.02639400 |
| H | -1.63822100 | 1.51740900  | 7.36980100 |
| H | -4.79918900 | -0.01633200 | 6.08589500 |
| H | -1.65321000 | -1.37721500 | 7.46320200 |
| H | -0.08283200 | -4.57553900 | 6.34797500 |
| H | 1.29122900  | -1.38660900 | 7.62929000 |
| H | 4.52494100  | 0.12659000  | 6.59186800 |
| H | -0.28285800 | 2.77216200  | 8.43178100 |
| H | -2.82455400 | 0.10280900  | 8.43736100 |
| H | -4.27132800 | -0.90146100 | 8.32761500 |
| H | -0.22985300 | -2.49708500 | 8.60891500 |
| H | 0.71241600  | -3.98894400 | 8.61322200 |
| C | -3.33214200 | -3.47831500 | 2.83558000 |
| C | -3.81741600 | -4.79118700 | 2.83431000 |
| C | -3.32686100 | -2.79697800 | 1.62408400 |
| C | -4.29368100 | -5.39317400 | 1.67461200 |
| C | -3.79805400 | -3.37434100 | 0.45171400 |
| C | -4.28229800 | -4.67394800 | 0.48957600 |
| C | 3.57295600  | -3.36236700 | 3.21279200 |
| C | 4.83515800  | -3.95563100 | 3.32462700 |
| C | 2.98880400  | -3.33067800 | 1.95230300 |
| C | 5.48137100  | -4.51013300 | 2.22476600 |
| C | 3.61204300  | -3.87790300 | 0.83750500 |
| C | 4.85865000  | -4.46842300 | 0.98681500 |
| C | -3.91178100 | 3.74495300  | 2.91768100 |
| C | -3.36063800 | 4.94900600  | 2.40475700 |
| C | -5.12075100 | 3.39227000  | 2.26728600 |
| C | -3.86639800 | 5.67771400  | 1.33827500 |
| C | -5.63041500 | 4.10417200  | 1.17792800 |
| C | -5.00799200 | 5.23747700  | 0.70010800 |
| C | 3.32287200  | 0.17333700  | 8.35773100 |
| H | 3.82730900  | -0.68400300 | 8.81100200 |
| H | 3.78474700  | 1.08913500  | 8.73590800 |

|   |             |             |             |
|---|-------------|-------------|-------------|
| H | 2.28447200  | 0.16267000  | 8.69900700  |
| H | 0.69753300  | 4.23301100  | 8.29332300  |
| H | -4.40851800 | 0.86851800  | 8.32870800  |
| H | -1.06024600 | -4.04993200 | 8.53204700  |
| H | -0.32898000 | 3.08235400  | 3.00711000  |
| H | -1.07489800 | 4.33720500  | 8.26296300  |
| F | 5.44698800  | -4.99186700 | -0.09420300 |
| F | 5.17995600  | 4.67950900  | -0.54301800 |
| F | -5.53580200 | 5.88947300  | -0.33805600 |
| F | -4.73368300 | -5.21724000 | -0.64618500 |
| F | 3.01932400  | -3.82829500 | -0.35547700 |
| F | -3.77675700 | -2.68747300 | -0.69061000 |
| F | -6.76412300 | 3.67993900  | 8.26179900  |
| F | 2.67569300  | 3.65990500  | -0.62444000 |
| F | 1.79706000  | -2.74308700 | 1.76831200  |
| H | 5.31232200  | -3.97622500 | 4.29835900  |
| H | 5.25588100  | 3.78581800  | 3.87658000  |
| H | -2.49466100 | 5.36371800  | 2.88340600  |
| H | -3.81601100 | -5.34392000 | 3.76729400  |
| F | 1.52651100  | 2.70145800  | 1.59470900  |
| F | -5.94546000 | 2.39822000  | 2.60053500  |
| F | -2.83740100 | -1.55111200 | 1.54444800  |
| H | -3.38194600 | 6.58926500  | 1.00881400  |
| H | 6.33222200  | 4.66199200  | 1.79398000  |
| H | 6.45664700  | -4.97526600 | 2.30752100  |
| H | -4.67546100 | -6.40735300 | 1.67089000  |

## 6-TS

|                                              |             |             |            |
|----------------------------------------------|-------------|-------------|------------|
| Zero-point correction=                       |             |             | 0.850285   |
| (Hartree/Particle)                           |             |             |            |
| Thermal correction to Energy=                |             | 0.912918    |            |
| Thermal correction to Enthalpy=              |             | 0.913862    |            |
| Thermal correction to Gibbs Free Energy=     |             | 0.751778    |            |
| Sum of electronic and zero-point Energies=   |             |             | -          |
| 4105.659417                                  |             |             |            |
| Sum of electronic and thermal Energies=      |             |             | -          |
| 4105.596784                                  |             |             |            |
| Sum of electronic and thermal Enthalpies=    |             |             | -          |
| 4105.595840                                  |             |             |            |
| Sum of electronic and thermal Free Energies= |             |             | -          |
| 4105.757924                                  |             |             |            |
| O                                            | 1.06949700  | 4.47108300  | 4.06183800 |
| O                                            | -1.27348400 | 4.61046500  | 4.14411500 |
| O                                            | -4.67145100 | 1.16150800  | 4.08413400 |
| O                                            | -4.48654200 | -1.17621400 | 3.95364500 |
| O                                            | -1.14730400 | -4.55309800 | 4.31170400 |
| O                                            | 1.20029000  | -4.50460400 | 4.39318500 |
| O                                            | 4.55025700  | -1.13127900 | 4.51866500 |
| O                                            | 4.52106600  | 1.21430300  | 4.45332600 |
| C                                            | 2.75613000  | 2.80063500  | 4.21741400 |
| C                                            | 1.59781000  | 3.39270000  | 4.74033300 |
| C                                            | -0.13645400 | 4.29942600  | 3.36636300 |
| C                                            | -1.95372500 | 3.54428300  | 4.69616500 |
| C                                            | -3.11147900 | 3.02397700  | 4.06164200 |
| C                                            | -3.62484900 | 1.84726300  | 4.66620500 |
| C                                            | -4.32973100 | 0.04749700  | 3.28627600 |
| C                                            | -3.40718800 | -1.69626300 | 4.63683900 |
| C                                            | -2.77918400 | -2.82650900 | 4.09517700 |
| C                                            | -1.73659200 | -3.41584200 | 4.82213300 |
| C                                            | 0.05090100  | -4.38717000 | 3.59002600 |
| C                                            | 1.69956200  | -3.36857100 | 4.99372700 |



|   |             |             |            |
|---|-------------|-------------|------------|
| C | 2.83102700  | -2.77344600 | 4.42384900 |
| C | 3.40125000  | -1.66633100 | 5.06141800 |
| C | 4.42314200  | 0.01790100  | 3.71587600 |
| C | 3.35320200  | 1.76046000  | 4.94206800 |
| C | 1.67586900  | 1.93520700  | 6.63694900 |
| C | 1.05185000  | 2.98443900  | 5.96247100 |
| C | -0.19224400 | 3.67565900  | 6.50289500 |
| C | -1.43470300 | 3.03861400  | 5.89280300 |
| C | -2.04568500 | 1.93211300  | 6.46892900 |
| C | -3.13112600 | 1.31365000  | 5.86150900 |
| C | -3.75538000 | 0.04707400  | 6.43431800 |
| C | -3.03037500 | -1.17048800 | 5.87798400 |
| C | -1.97646800 | -1.78527300 | 6.55369800 |
| C | -1.31448000 | -2.90489900 | 6.05186000 |
| C | -0.11461800 | -3.53159400 | 6.74638700 |
| C | 1.14326900  | -2.88539300 | 6.18352000 |
| C | 1.73949600  | -1.77324400 | 6.77704200 |
| C | 2.86534900  | -1.14687600 | 6.24387300 |
| C | 3.46172800  | 0.11489800  | 6.85008300 |
| C | 2.82346900  | 1.30822800  | 6.15363500 |
| C | 3.36245500  | 3.27823300  | 2.94499300 |
| C | 2.64427700  | 3.21869300  | 1.74762100 |
| C | 3.22543800  | 3.67592400  | 0.57582100 |
| C | 4.51383000  | 4.19238800  | 0.56406400 |
| C | 5.21987100  | 4.23857000  | 1.76053800 |
| C | 4.66469700  | 3.78715500  | 2.94538100 |
| C | -0.24250500 | 3.72660400  | 8.03219400 |
| C | -3.83243300 | 0.06183700  | 7.96319900 |
| C | -0.19868400 | -3.48530900 | 8.27283100 |
| H | -0.10876700 | 5.02634700  | 2.55188200 |
| H | -3.30061800 | 0.16321300  | 2.92150700 |
| H | -5.04612300 | 0.02337100  | 2.46243800 |
| H | 0.04234400  | -3.41810800 | 3.07341300 |
| H | 0.09621100  | -5.21769200 | 2.88625600 |
| H | 5.28206700  | 0.00906000  | 3.04583300 |
| H | 3.47538100  | -0.00764200 | 3.16093500 |
| H | 1.25739300  | 1.60050800  | 7.58085700 |
| H | -0.15521500 | 4.70746300  | 6.14276900 |
| H | -1.64915400 | 1.52555400  | 7.39379900 |
| H | -4.78009100 | -0.00142500 | 6.05591100 |
| H | -1.66492500 | -1.38122500 | 7.51175000 |
| H | -0.08950900 | -4.58322500 | 6.44422200 |
| H | 1.30892000  | -1.37887200 | 7.69212900 |
| H | 4.52258600  | 0.12331600  | 6.58130700 |
| H | 1.64240500  | 2.80647600  | 1.70301700 |
| H | -0.29712700 | 2.73919300  | 8.49768200 |
| H | -2.85406800 | 0.12394400  | 8.44648900 |
| H | -4.31994100 | -0.84942300 | 8.31950500 |
| H | -0.23807200 | -2.46857000 | 8.67235400 |
| H | 0.67423700  | -3.97773700 | 8.70908900 |
| C | -3.21591500 | -3.40871900 | 2.79700200 |
| C | -3.70075000 | -4.71916400 | 2.75143800 |
| C | -3.13783000 | -2.65945600 | 1.61983000 |
| C | -4.11048800 | -5.25192000 | 1.54131600 |
| H | -3.75928900 | -5.33024600 | 3.64483600 |
| C | -3.55324100 | -3.21858000 | 0.42194900 |
| H | -2.74240600 | -1.64985400 | 1.61101300 |
| C | -4.04561300 | -4.51507500 | 0.36433600 |
| C | 3.42685200  | -3.31039900 | 3.16826600 |
| C | 4.57735100  | -4.10000400 | 3.22412900 |
| C | 2.84004200  | -3.02074400 | 1.93403600 |
| C | 5.11846300  | -4.59455900 | 2.04940500 |

|   |             |             |             |
|---|-------------|-------------|-------------|
| H | 5.05736400  | -4.33246100 | 4.16795100  |
| C | 3.40383900  | -3.52927200 | 0.77359100  |
| H | 1.95663200  | -2.39567400 | 1.85635000  |
| C | 4.54336100  | -4.32054100 | 0.81360900  |
| C | -3.75486300 | 3.67948900  | 2.86286100  |
| C | -3.25750800 | 4.87814500  | 2.30795400  |
| C | -4.92943400 | 3.16878700  | 2.27010000  |
| C | -3.86931200 | 5.47730700  | 1.22173800  |
| H | -2.41457900 | 5.40383000  | 2.72107500  |
| C | -5.51810900 | 3.79164900  | 1.18446100  |
| H | -5.44611400 | 2.30631100  | 2.65268100  |
| C | -5.00254600 | 4.94923700  | 0.62572900  |
| C | 3.36340500  | 0.16996200  | 8.37523700  |
| H | 3.87049000  | -0.69423900 | 8.81204800  |
| H | 3.84336000  | 1.07924200  | 8.74626900  |
| H | 2.33346300  | 0.16776300  | 8.74154600  |
| H | 0.65116900  | 4.22470800  | 8.41720700  |
| H | -4.41838100 | 0.92278600  | 8.29483600  |
| H | -1.09779600 | -4.00702500 | 8.61078300  |
| H | 5.25211200  | 3.83278900  | 3.85523200  |
| H | -0.22456600 | 3.27281800  | 2.98702800  |
| H | -1.12164200 | 4.29078200  | 8.35373300  |
| F | 5.07645600  | -4.80376900 | -0.30701300 |
| F | 5.06242900  | 4.62924700  | -0.56775200 |
| F | -5.57675400 | 5.53409100  | -0.42156500 |
| F | -4.44182900 | -5.04259900 | -0.79211100 |
| F | 6.21749100  | -5.35444400 | 2.07598000  |
| F | 2.85696400  | -3.26179700 | -0.41721300 |
| F | -3.48236200 | -2.51409900 | -0.71300500 |
| F | -4.58210300 | -6.50105700 | 1.47571500  |
| F | -6.63088700 | 3.27171000  | 0.65059000  |
| F | -3.36263400 | 6.61269200  | 0.72396600  |
| F | 2.55080900  | 3.62358000  | -0.57824800 |
| F | 6.46153700  | 4.73376900  | 1.73910300  |

## 7-TS

|                                              |             |             |            |
|----------------------------------------------|-------------|-------------|------------|
| Zero-point correction=                       |             |             | 0.818171   |
| (Hartree/Particle)                           |             |             |            |
| Thermal correction to Energy=                |             | 0.884345    |            |
| Thermal correction to Enthalpy=              |             | 0.885289    |            |
| Thermal correction to Gibbs Free Energy=     |             | 0.718046    |            |
| Sum of electronic and zero-point Energies=   |             |             | -          |
| 4502.485746                                  |             |             |            |
| Sum of electronic and thermal Energies=      |             |             | -          |
| 4502.419573                                  |             |             |            |
| Sum of electronic and thermal Enthalpies=    |             |             | -          |
| 4502.418629                                  |             |             |            |
| Sum of electronic and thermal Free Energies= |             |             | -          |
| 4502.585871                                  |             |             |            |
| O                                            | 1.03667900  | 4.35623400  | 3.89994000 |
| O                                            | -1.29524100 | 4.54853700  | 4.08924600 |
| O                                            | -4.73829000 | 1.14341200  | 4.15818200 |
| O                                            | -4.52121500 | -1.18565400 | 3.93146500 |
| O                                            | -1.15801500 | -4.53929700 | 4.25631300 |
| O                                            | 1.19890400  | -4.45038800 | 4.26714000 |
| O                                            | 4.61170700  | -1.14186400 | 4.54491400 |
| O                                            | 4.55569900  | 1.20248800  | 4.44753100 |
| C                                            | 2.76686100  | 2.75377300  | 4.15813900 |
| C                                            | 1.58023700  | 3.32759500  | 4.63750100 |
| C                                            | -0.20807100 | 4.14354100  | 3.27901000 |
| C                                            | -2.02355200 | 3.53135000  | 4.67232400 |

|   |             |             |            |   |             |             |             |
|---|-------------|-------------|------------|---|-------------|-------------|-------------|
| C | -3.22703300 | 3.03746200  | 4.08434500 | C | -4.28226300 | -4.67956000 | 0.48206100  |
| C | -3.70344700 | 1.85177000  | 4.70222700 | C | 3.56513900  | -3.35797100 | 3.20879100  |
| C | -4.39050500 | 0.07622200  | 3.30919200 | C | 4.82301300  | -3.95994400 | 3.32890600  |
| C | -3.44570400 | -1.70015400 | 4.61752500 | C | 2.98065100  | -3.31239100 | 1.95041000  |
| C | -2.83351700 | -2.84468100 | 4.08560800 | C | 5.44497100  | -4.50184300 | 2.22001400  |
| C | -1.76714700 | -3.42111300 | 4.78510300 | C | 3.60301500  | -3.85768100 | 0.83265000  |
| C | 0.01448800  | -4.30523300 | 3.50930400 | C | 4.84472700  | -4.46077400 | 0.96532400  |
| C | 1.71144100  | -3.34661000 | 4.91269600 | C | -3.90557800 | 3.73531200  | 2.91400400  |
| C | 2.88494000  | -2.77839800 | 4.39745300 | C | -3.34227100 | 4.93444200  | 2.40485500  |
| C | 3.44707700  | -1.67770500 | 5.05435900 | C | -5.11326500 | 3.38680600  | 2.26226600  |
| C | 4.49232900  | -0.00439700 | 3.72258600 | C | -3.85642500 | 5.64938100  | 1.34710200  |
| C | 3.36928600  | 1.73541400  | 4.90676500 | C | -5.62026400 | 4.10910300  | 1.17636000  |
| C | 1.66462700  | 1.91932100  | 6.57036300 | C | -5.00521600 | 5.24359800  | 0.69076400  |
| C | 1.03212300  | 2.94594000  | 5.86779300 | C | 3.32419500  | 0.17421100  | 8.35660200  |
| C | -0.20112500 | 3.65575200  | 6.41151200 | H | 3.82916300  | -0.68311700 | 8.80911600  |
| C | -1.47068200 | 3.02465900  | 5.85253400 | H | 3.78694500  | 1.08963400  | 8.73437400  |
| C | -2.06708700 | 1.92689800  | 6.45919300 | H | 2.28618100  | 0.16375500  | 8.69907800  |
| C | -3.16619000 | 1.31368800  | 5.87917600 | H | 0.69375100  | 4.23458400  | 8.29530700  |
| C | -3.76684900 | 0.03263300  | 6.44277700 | H | -4.40764600 | 0.86784200  | 8.32827000  |
| C | -3.04618600 | -1.17283700 | 5.85326500 | H | -1.05971400 | -4.04968900 | 8.53425700  |
| C | -1.97923300 | -1.78581800 | 6.51135200 | H | -0.32654100 | 3.09261100  | 2.99795500  |
| C | -1.32094900 | -2.90258900 | 6.00072200 | H | -1.07839400 | 4.33618800  | 8.26404500  |
| C | -0.10763500 | -3.52947900 | 6.66707900 | F | 5.44810100  | -4.98467800 | -0.09762400 |
| C | 1.14474400  | -2.87451800 | 6.10282000 | F | 5.19980900  | 4.68243000  | -0.53304500 |
| C | 1.74046200  | -1.77538900 | 6.72082300 | F | -5.51226200 | 5.91377200  | -0.33678600 |
| C | 2.88079400  | -1.15266300 | 6.21887600 | F | -4.73577200 | -5.24461900 | -0.63317700 |
| C | 3.45818600  | 0.11302100  | 6.83462500 | F | 6.64481100  | -5.08256800 | 2.32599300  |
| C | 2.82369300  | 1.29416000  | 6.11494700 | F | 3.01534500  | -3.79820100 | -0.36000500 |
| C | 3.41518800  | 3.25160000  | 2.91733900 | F | -3.77349300 | -2.70158700 | -0.68862300 |
| C | 2.75595700  | 3.21882300  | 1.69526100 | F | -4.75361900 | -6.62730200 | 1.69206000  |
| C | 3.34457600  | 3.69897700  | 0.53069900 | F | -6.75164200 | 3.69200800  | 0.61056400  |
| C | 4.62855200  | 4.22108700  | 0.57549000 | F | -3.24392500 | 6.76961900  | 0.94146400  |
| C | 5.30338200  | 4.24849300  | 1.79195600 | F | 2.68375100  | 3.65376800  | -0.62368800 |
| C | 4.71512900  | 3.77206800  | 2.94785700 | F | 6.54226700  | 4.75189800  | 1.81458700  |
| C | -0.21748300 | 3.74566700  | 7.94057900 | F | 1.79244100  | -2.71566700 | 1.76938700  |
| C | -3.81057700 | 0.02396800  | 7.97327500 | H | 5.32140100  | -4.00428600 | 4.29056300  |
| C | -0.17371500 | -3.50661800 | 8.19544200 | H | 5.27227900  | 3.80437800  | 3.87699900  |
| H | -0.20899300 | 4.79470800  | 2.40252400 | H | -2.47350900 | 5.36953900  | 2.86366200  |
| H | -3.37022500 | 0.21171000  | 2.93577200 | H | -3.82650400 | -5.36600100 | 3.76956500  |
| H | -5.12191600 | 0.07198600  | 2.50088100 | F | 1.52455700  | 2.69650800  | 1.59494000  |
| H | -0.02594200 | -3.31009800 | 3.05468700 | F | -5.93984000 | 2.39026800  | 2.58492300  |
| H | 0.05823700  | -5.09293900 | 2.75739400 | F | -2.83187300 | -1.55417600 | 1.54359700  |
| H | 5.37058400  | -0.00989700 | 3.07792300 |   |             |             |             |
| H | 3.55988200  | -0.05038200 | 3.14314100 |   |             |             |             |
| H | 1.24181500  | 1.60270800  | 7.51847100 |   |             |             |             |
| H | -0.15961700 | 4.67861100  | 6.02820900 |   |             |             |             |
| H | -1.63990300 | 1.51844800  | 7.36974600 |   |             |             |             |
| H | -4.79891700 | -0.01838900 | 6.08606700 |   |             |             |             |
| H | -1.65387000 | -1.37977000 | 7.46404800 |   |             |             |             |
| H | -0.08127700 | -4.57696300 | 6.35089500 |   |             |             |             |
| H | 1.29414500  | -1.38793300 | 7.63114000 |   |             |             |             |
| H | 4.52464100  | 0.12807500  | 6.58968900 |   |             |             |             |
| H | -0.28426000 | 2.77205600  | 8.43272200 |   |             |             |             |
| H | -2.82387700 | 0.10181900  | 8.43726500 |   |             |             |             |
| H | -4.27108800 | -0.90185500 | 8.32814700 |   |             |             |             |
| H | -0.22898300 | -2.49686200 | 8.61042000 |   |             |             |             |
| H | 0.71255500  | -3.98916100 | 8.61573300 |   |             |             |             |
| C | -3.33018700 | -3.47956400 | 2.83727300 |   |             |             |             |
| C | -3.81573600 | -4.79292700 | 2.84956300 |   |             |             |             |
| C | -3.32233100 | -2.79974800 | 1.62649800 |   |             |             |             |
| C | -4.28402000 | -5.37483300 | 1.68713300 |   |             |             |             |
| C | -3.79433400 | -3.38174500 | 0.45525200 |   |             |             |             |

## 8-TS

|                                              |             |             |            |
|----------------------------------------------|-------------|-------------|------------|
| Zero-point correction=                       | 0.987548    |             |            |
| (Hartree/Particle)                           |             |             |            |
| Thermal correction to Energy=                | 1.069111    |             |            |
| Thermal correction to Enthalpy=              | 1.070056    |             |            |
| Thermal correction to Gibbs Free Energy=     | 0.855004    |             |            |
| Sum of electronic and zero-point Energies=   | -           |             |            |
| 5610.681062                                  |             |             |            |
| Sum of electronic and thermal Energies=      | -           |             |            |
| 5610.599498                                  |             |             |            |
| Sum of electronic and thermal Enthalpies=    | -           |             |            |
| 5610.598554                                  |             |             |            |
| Sum of electronic and thermal Free Energies= | -           |             |            |
| 5610.813605                                  |             |             |            |
| O                                            | 0.72272800  | 4.54782500  | 4.03299900 |
| O                                            | -1.62311400 | 4.47216900  | 4.11246700 |
| O                                            | -4.76580500 | 0.78158700  | 4.07542900 |
| O                                            | -4.46331300 | -1.54169100 | 3.99110700 |

|   |             |             |            |   |             |             |             |
|---|-------------|-------------|------------|---|-------------|-------------|-------------|
| O | -0.78014900 | -4.55155900 | 4.14796900 | H | -2.81834300 | -0.12259300 | 8.42645600  |
| O | 1.56023600  | -4.44223000 | 4.37287900 | H | -4.22858900 | -1.17734600 | 8.32849800  |
| O | 4.59772500  | -0.76606900 | 4.39032900 | H | -0.01842100 | -2.50135300 | 8.59620900  |
| O | 4.43340000  | 1.58239600  | 4.41365100 | H | 0.94214400  | -3.97966900 | 8.62110900  |
| C | 2.55430500  | 3.03843100  | 4.19053300 | C | -3.02318500 | -3.58662600 | 2.74313200  |
| C | 1.34326200  | 3.51945700  | 4.70977100 | C | -4.28236600 | -4.19162600 | 2.63866200  |
| C | -0.46240600 | 4.26825400  | 3.33427300 | C | -2.20051600 | -3.55451000 | 1.62089400  |
| C | -2.21130900 | 3.34991400  | 4.65835400 | C | -4.68275400 | -4.76397800 | 1.43907100  |
| C | -3.31970700 | 2.73302900  | 4.02079300 | H | -4.94074400 | -4.21665700 | 3.50049200  |
| C | -3.75255200 | 1.52939000  | 4.63731400 | C | -2.61314400 | -4.13643800 | 0.42205900  |
| C | -4.39996600 | -0.33119600 | 3.28271100 | H | -1.23328500 | -3.06324900 | 1.66834200  |
| C | -3.31852600 | -1.96749300 | 4.63310800 | H | -3.85286600 | -4.74811800 | 0.31691500  |
| C | -2.58104400 | -2.99770700 | 4.03538200 | C | 3.70321600  | -3.13328500 | 3.13045700  |
| C | -1.44598300 | -3.48003000 | 4.70355700 | C | 4.28252700  | -4.40589500 | 3.15076800  |
| C | 0.45513200  | -4.33475600 | 3.50704400 | C | 3.73943700  | -2.40199500 | 1.94415500  |
| C | 1.99587400  | -3.27038700 | 4.95603400 | C | 4.89718400  | -4.91407300 | 2.01147800  |
| C | 3.06068200  | -2.58639800 | 4.35536600 | H | 4.25505800  | -4.99497300 | 4.06245400  |
| C | 3.51076000  | -1.40016600 | 4.95374800 | C | 4.36138100  | -2.92034000 | 0.81072000  |
| C | 4.38616300  | 0.40701500  | 3.63985100 | H | 3.26913900  | -1.42489700 | 1.89175400  |
| C | 3.23025600  | 2.04269900  | 4.90738600 | C | 4.94820400  | -4.17922200 | 0.82932600  |
| C | 1.53259700  | 2.04833000  | 6.58910600 | C | -3.98607600 | 3.31405400  | 2.79474200  |
| C | 0.82754900  | 3.05175100  | 5.92411300 | C | -3.56868900 | 4.52674400  | 2.20985900  |
| C | -0.47161700 | 3.63054000  | 6.46813400 | C | -5.09747400 | 2.70747700  | 2.17385500  |
| C | -1.65725100 | 2.89255200  | 5.85843400 | C | -4.15815400 | 5.03473500  | 1.05698600  |
| C | -2.18481500 | 1.74715500  | 6.44029100 | H | -2.78627000 | 5.11375700  | 2.65852000  |
| C | -3.22325800 | 1.04675700  | 5.84035200 | C | -5.67797200 | 3.22936200  | 1.02286500  |
| C | -3.75365400 | -0.25384900 | 6.43296800 | H | -5.54849700 | 1.82525700  | 2.59358900  |
| C | -2.95296700 | -1.41515700 | 5.86278700 | C | -5.21401500 | 4.39333900  | 0.42646500  |
| C | -1.82658600 | -1.93800300 | 6.49708100 | C | 3.37251900  | 0.38730600  | 8.29462500  |
| C | -1.06783000 | -2.97401900 | 5.95333600 | H | 3.93239600  | -0.45411700 | 8.71084700  |
| C | 0.16108800  | -3.53352600 | 6.65752400 | H | 3.80517400  | 1.31577700  | 8.67593900  |
| C | 1.38495100  | -2.80774700 | 6.12222900 | H | 2.34859500  | 0.32203500  | 8.67170200  |
| C | 1.88433700  | -1.64073700 | 6.69754900 | H | 0.32632300  | 4.24708800  | 8.38105600  |
| C | 2.94680700  | -0.92650100 | 6.14531100 | H | -4.42868100 | 0.58600900  | 8.30661700  |
| C | 3.45682600  | 0.36622300  | 6.76749800 | H | -0.82679000 | -4.06696800 | 8.50581800  |
| C | 2.72974000  | 1.52460500  | 6.10285500 | H | 5.00573100  | 4.13537100  | 3.81746600  |
| C | 3.12415700  | 3.57636800  | 2.92705800 | H | -0.45683600 | 3.23754100  | 2.95534400  |
| C | 2.39067300  | 3.55462400  | 1.74266200 | H | -1.44535100 | 4.15557500  | 8.32406400  |
| C | 2.92412100  | 4.08073900  | 0.56756400 | H | 5.43690100  | -4.57779700 | -0.05229400 |
| C | 4.19957700  | 4.62708000  | 0.54511100 | H | -4.16922600 | -5.20609600 | -0.61419100 |
| C | 4.93775400  | 4.63427900  | 1.72808500 | H | -5.65892300 | 4.78512000  | -0.48069000 |
| C | 4.41568600  | 4.11657200  | 2.90708000 | H | 4.61031000  | 5.04160700  | -0.36882900 |
| C | -0.52087000 | 3.67239400  | 7.99782200 | C | 4.36433500  | -2.08153100 | -0.43800100 |
| C | -3.80113600 | -0.24011800 | 7.96272100 | C | 5.47823500  | -6.30194500 | 2.06446400  |
| C | 0.05719100  | -3.51072000 | 8.18342400 | C | -1.67231800 | -4.07697800 | -0.74989100 |
| H | -0.49959700 | 4.99481800  | 2.51912700 | C | -6.04843800 | -5.38461700 | 1.31270500  |
| H | -3.39660000 | -0.18080000 | 2.86337300 | C | -6.86652900 | 2.50208500  | 0.45351700  |
| H | -5.15478100 | -0.40821400 | 2.49805000 | C | -3.61883300 | 6.33425400  | 0.52168600  |
| H | 0.46824000  | -3.34903200 | 3.02299600 | C | 2.06977900  | 4.04584400  | -0.67010900 |
| H | 0.55433800  | -5.14185200 | 2.78111500 | C | 6.34537600  | 5.16784000  | 1.71216700  |
| H | 5.22261300  | 0.46435300  | 2.94310000 | F | 5.12215700  | -2.61069100 | -1.40665600 |
| H | 3.42268800  | 0.35819600  | 3.11506600 | F | 3.12285200  | -1.93095900 | -0.93333100 |
| H | 1.13662700  | 1.66451300  | 7.52413000 | F | 4.82951900  | -0.84124500 | -0.19098700 |
| H | -0.52403100 | 4.66299300  | 6.11195600 | F | 6.31906800  | -6.53669600 | 1.04612000  |
| H | -1.76209700 | 1.37957400  | 7.36975700 | F | 4.51467200  | -7.23970800 | 2.00723100  |
| H | -4.77911100 | -0.37263000 | 6.07272000 | F | 6.15511800  | -6.51248700 | 3.20554400  |
| H | -1.53570200 | -1.53101700 | 7.46026100 | F | -1.43772300 | -2.80739300 | -1.12822000 |
| H | 0.25142800  | -4.57841500 | 6.34456200 | F | -2.14200100 | -4.73483300 | -1.81699700 |
| H | 1.42501300  | -1.27028000 | 7.60861400 | F | -0.47417500 | -4.61010900 | -0.44045300 |
| H | 4.51171400  | 0.45383600  | 6.48987800 | F | -6.89779900 | -4.57124600 | 0.65851000  |
| H | 1.39869600  | 3.11347700  | 1.72408400 | F | -6.00534100 | -6.53559700 | 0.62073800  |
| H | -0.48554300 | 2.68294600  | 8.46081100 | F | -6.59678500 | -5.65088400 | 2.50711900  |

|   |             |            |             |
|---|-------------|------------|-------------|
| F | -7.16316800 | 2.91153300 | -0.78794400 |
| F | -7.96622700 | 2.68296200 | 1.20667800  |
| F | -6.65485100 | 1.17264500 | 0.39934200  |
| F | -4.11502400 | 6.62913800 | -0.68794300 |
| F | -2.27695400 | 6.30315600 | 0.41077000  |
| F | -3.91060000 | 7.36450300 | 1.33613300  |
| F | 6.49628800  | 6.14978500 | 0.80939500  |
| F | 6.71065200  | 5.65607400 | 2.90757100  |
| F | 7.23161200  | 4.20541100 | 1.39456300  |
| F | 0.91852600  | 4.72075900 | -0.48710700 |
| F | 1.72467400  | 2.78587000 | -0.99331400 |
| F | 2.68556300  | 4.58044500 | -1.73155900 |

9

Zero-point correction= 1.135714  
(Hartree/Particle)

Thermal correction to Energy= 1.204697  
Thermal correction to Enthalpy= 1.205642  
Thermal correction to Gibbs Free Energy= 1.025355  
Sum of electronic and zero-point Energies= -  
2787.589918  
Sum of electronic and thermal Energies= -  
2787.520935  
Sum of electronic and thermal Enthalpies= -  
2787.519991  
Sum of electronic and thermal Free Energies= -  
2787.700277

|   |             |             |             |
|---|-------------|-------------|-------------|
| C | -4.19631400 | 3.15809000  | 0.49910200  |
| C | -2.81748000 | 3.20929700  | 0.31282200  |
| C | -2.14577200 | 4.43737400  | 0.23961900  |
| C | -2.88816800 | 5.61958200  | 0.34120200  |
| C | -4.27225200 | 5.59765300  | 0.54566500  |
| C | -4.90982800 | 4.35771000  | 0.63087000  |
| H | -2.23967700 | 2.29065800  | 0.26546700  |
| H | -2.38573300 | 6.57563600  | 0.26087500  |
| H | -5.98105300 | 4.30585200  | 0.79440700  |
| C | -5.02548700 | 6.92531200  | 0.66911500  |
| C | -4.85292800 | 7.72659300  | -0.63360100 |
| C | -6.52310700 | 6.71795400  | 0.91854000  |
| C | -4.43960400 | 7.72819100  | 1.84498100  |
| H | -3.80154200 | 7.95438100  | -0.83226100 |
| H | -5.25017200 | 7.17055500  | -1.48895900 |
| H | -5.39241400 | 8.67669000  | -0.55999700 |
| H | -6.70798000 | 6.16478200  | 1.84521800  |
| H | -7.01197500 | 7.69242000  | 1.01013000  |
| H | -7.00287600 | 6.18288300  | 0.09222500  |
| H | -4.97236900 | 8.67953900  | 1.94661000  |
| H | -4.54423200 | 7.17404800  | 2.78323800  |
| C | -3.37860900 | 7.95231800  | 1.69890600  |
| C | -4.45144400 | 0.73970500  | -0.05450000 |
| C | -4.90120800 | 1.84917400  | 0.57148300  |
| C | -4.95140500 | -0.63946700 | -0.03302000 |
| C | -6.25926700 | -1.00572800 | 0.30341900  |
| C | -4.03904900 | -1.64236800 | -0.39091200 |
| C | -6.66502500 | -2.34519900 | 0.31185600  |
| H | -6.98443700 | -0.23721900 | 0.54159000  |
| C | -4.40696300 | -2.98474300 | -0.35826200 |
| H | -3.03978300 | -1.36054700 | -0.71160100 |
| C | -5.72482300 | -3.32302100 | -0.01884700 |
| H | -6.00434600 | -4.37131000 | -0.01807000 |
| C | -0.69031200 | 4.37375400  | 0.06853800  |

|   |              |             |             |
|---|--------------|-------------|-------------|
| C | 0.27353500   | 5.29495500  | 0.28606600  |
| N | -0.24188600  | 7.72248900  | 1.05638200  |
| C | -0.03620900  | 6.63323400  | 0.71913000  |
| C | 2.20833600   | 3.70163100  | 0.23562200  |
| C | 3.55475600   | 3.40744600  | 0.00232900  |
| C | 4.42726000   | 4.45240700  | -0.35220100 |
| C | 3.97308800   | 5.76456000  | -0.46871600 |
| C | 2.61267700   | 6.02144400  | -0.24362500 |
| C | 1.71978400   | 5.00239100  | 0.09113000  |
| H | 1.54409800   | 2.90454200  | 0.55689900  |
| H | 5.47188800   | 4.23806200  | -0.52491200 |
| H | 2.23474500   | 7.03651900  | -0.33498500 |
| C | -8.11319900  | -2.67989700 | 0.68027000  |
| C | -8.41507800  | -2.13406700 | 2.08762800  |
| C | -9.05703900  | -2.01736300 | -0.33942500 |
| C | -8.37548400  | -4.18965000 | 0.67501000  |
| H | -7.75150400  | -2.58865900 | 2.83030200  |
| H | -8.29084200  | -1.04827800 | 2.14171000  |
| H | -9.44909200  | -2.36765700 | 2.36247500  |
| H | -8.85313000  | -2.38020500 | -1.35193400 |
| H | -10.09716700 | -2.25381500 | -0.09164800 |
| H | -8.95276800  | -0.92838500 | -0.33874800 |
| H | -9.41822000  | -4.37570900 | 0.94902300  |
| H | -8.20829000  | -4.62933500 | -0.31380100 |
| H | -7.74339900  | -4.71302500 | 1.40007100  |
| C | 4.90605800   | 6.92247300  | -0.83432700 |
| C | 4.41406000   | 7.57678000  | -2.13770400 |
| C | 4.88634900   | 7.96180900  | 0.30082500  |
| C | 6.35107100   | 6.45443500  | -1.04133400 |
| H | 4.41039800   | 6.85287400  | -2.95882800 |
| H | 3.40228600   | 7.97981600  | -2.03386100 |
| H | 5.07698100   | 8.40407000  | -2.41187300 |
| H | 5.22934500   | 7.51712000  | 1.24035200  |
| H | 5.55072800   | 8.79620100  | 0.05282900  |
| H | 3.88401000   | 8.36881200  | 0.46411700  |
| H | 6.97530700   | 7.31567400  | -1.29764300 |
| H | 6.76718000   | 6.00002600  | -0.13625200 |
| H | 6.43376500   | 5.72900900  | -1.85731600 |
| H | -0.33420300  | 3.40485300  | -0.27476500 |
| C | 3.94308000   | 2.00224600  | 0.15319200  |
| C | 5.11370300   | 1.35841800  | -0.05291100 |
| H | 3.12808700   | 1.36337700  | 0.48768600  |
| C | 6.32194100   | 2.04680600  | -0.42463000 |
| N | 7.32151600   | 2.55840800  | -0.71101500 |
| C | 4.26299900   | -2.33914000 | 0.03686300  |
| C | 5.48257500   | -2.87565700 | 0.48773500  |
| C | 6.58676600   | -2.06052800 | 0.73065000  |
| C | 6.45047700   | -0.67897300 | 0.53390200  |
| C | 5.24569800   | -0.11496700 | 0.11162300  |
| C | 4.16386900   | -0.95747000 | -0.15505600 |
| H | 5.57201400   | -3.94174800 | 0.63687300  |
| H | 7.29668000   | -0.02204900 | 0.71868100  |
| H | 3.23886200   | -0.54231900 | -0.54553200 |
| C | 7.93036000   | -2.62454300 | 1.20127500  |
| C | 9.01444500   | -2.26802900 | 0.16837600  |
| C | 8.29266400   | -2.00183800 | 2.56136000  |
| C | 7.89144100   | -4.14879400 | 1.35986900  |
| H | 8.77534300   | -2.69806700 | -0.80937500 |
| H | 9.12175600   | -1.18611100 | 0.04615000  |
| H | 9.98178600   | -2.66648000 | 0.49183200  |
| H | 7.52939200   | -2.23414400 | 3.31087400  |
| H | 9.25026600   | -2.40197500 | 2.91061200  |



|   |             |             |             |
|---|-------------|-------------|-------------|
| C | 16.86984400 | 13.12886200 | 18.19159200 |
| C | 24.50630400 | 15.33809900 | 21.12339200 |
| C | 26.20983600 | 16.49827600 | 22.37660400 |
| C | 25.08598500 | 17.71069500 | 20.56440000 |
| H | 23.59621700 | 16.79404900 | 10.20602800 |
| H | 22.07906500 | 17.58491900 | 10.66176500 |
| H | 20.76754600 | 15.11614800 | 12.57281900 |
| H | 18.93604500 | 13.94709400 | 12.83394100 |
| H | 17.31480500 | 9.99357200  | 12.36490800 |
| H | 20.56119100 | 11.30052000 | 9.84523900  |
| H | 17.84806500 | 13.97422600 | 14.74633800 |
| H | 14.54186700 | 13.20181600 | 16.96249600 |
| H | 14.82860300 | 14.70722700 | 16.07543200 |
| H | 18.05001200 | 6.11271000  | 10.84847800 |
| H | 24.03704000 | 18.83720000 | 11.86385800 |
| H | 23.98240300 | 18.35711700 | 13.56600900 |
| H | 20.62487300 | 17.65723200 | 13.68440200 |
| H | 18.89955700 | 18.15159000 | 15.02008800 |
| H | 15.15177800 | 20.25444200 | 14.91987700 |
| H | 18.42065800 | 21.56854500 | 12.43472600 |
| H | 17.67904100 | 16.48289500 | 15.90194800 |
| H | 14.96625900 | 15.24171700 | 18.63591500 |
| H | 16.68029000 | 15.46314300 | 19.01689000 |
| H | 14.59116000 | 24.79997600 | 13.22067500 |
| H | 16.10394900 | 22.45256300 | 15.65585500 |
| H | 24.15721400 | 15.11202000 | 12.14325900 |
| H | 25.26434900 | 16.48632800 | 12.28335900 |
| H | 22.27489100 | 15.66398800 | 14.89315300 |
| H | 21.51112700 | 14.66032500 | 16.70010000 |
| H | 21.97916100 | 14.46450200 | 20.98078100 |
| H | 25.23233000 | 15.83437100 | 18.50380600 |
| H | 19.35421800 | 14.53563700 | 17.09173600 |
| H | 16.90318300 | 12.23512500 | 17.55869600 |
| H | 16.20657700 | 12.89949500 | 19.04399600 |
| H | 24.20379300 | 17.66584100 | 19.92912900 |
| H | 27.09837300 | 17.06981700 | 22.09337300 |
| H | 25.73385800 | 16.98435300 | 23.23839900 |
| H | 26.49296700 | 15.48638000 | 22.66179400 |
| H | 24.92933900 | 18.49601200 | 21.31376700 |
| H | 25.95195900 | 17.98390700 | 19.95079500 |
| H | 15.32836100 | 24.04116300 | 15.56515500 |
| H | 14.34508400 | 22.58648000 | 15.85686100 |
| H | 13.89113200 | 23.47924600 | 12.26237300 |
| H | 13.22578900 | 23.85980900 | 13.87779300 |
| H | 18.19732400 | 7.01289600  | 9.31062500  |
| H | 19.64579000 | 6.33858500  | 10.08519100 |
| H | 19.51222800 | 8.81363500  | 12.84439400 |
| H | 18.26833000 | 7.55365600  | 12.99570900 |
| H | 19.92863400 | 7.12393600  | 12.52198000 |

## References

- (1) J. A. Bryant; M. T. Blanda; M. Vincenti; D. J. Cram. Guest Capture during Shell Closure. *J. Am. Chem. Soc.* **1991**, *113*, 2167.
- (2) P. Thordarson. Determining association constants from titration experiments in supramolecular chemistry. *Chem. Soc. Rev.* **2011**, *40*, 1305.
- (3) Bindfit software can be found here: <http://supramolecular.org/>
- (4) M. B. Nielsen; J. O. Jeppesen; J. Lau; C. Lomholt; D. Damgaard; J. P. Jacobsen; J. Becher; J. F. Stoddart. Binding Studies between Tetrathiafulvalene Derivatives and Cyclobis(paraquat-p-phenylene). *J. Org. Chem.* **2001**, *66*, 3559.
- (5) Bruker (2015). APEX3. Bruker Analytical X-Ray Systems, Inc.: Madison, Wisconsin, USA.
- (6) Bruker (2015). SADABS. Bruker Analytical X-Ray Systems, Inc.: Madison, Wisconsin, USA.
- (7) A. Spek. Single-crystal structure validation with the program PLATON. *J. Appl. Cryst.* **2003**, *36*, 7.
- (8) A. Spek. Structure validation in chemical crystallography. *Acta Cryst. D* **2009**, *65*, 148.
- (9) G. M. Sheldrick. SHELXT - Integrated space-group and crystal-structure determination. *Acta Cryst. A* **2015**, *71*, 3.
- (10) G. M. Sheldrick. Crystal structure refinement with SHELXL. *Acta Cryst. C* **2015**, *71*, 3.
- (11) O. V. Dolomanov; L. J. Bourhis; R. J. Gildea; J. A. K. Howard; H. Puschmann. OLEX2: a complete structure solution, refinement and analysis program. *J. Appl. Cryst.* **2009**, *42*, 339.
- (12) C. B. Aakeröy; P. D. Chopade; N. Schultheiss; J. Desper. Versatile Launch Pad for Facile Functionalization of Cavitands. *Eur. J. Org. Chem.* **2011**, *2011*, 6789.
- (13) M. J. Frisch; G. W. Trucks; H. B. Schlegel; G. E. Scuseria; M. A. Robb; J. R. Cheeseman; G. Scalmani; V. Barone; G. A. Petersson; H. Nakatsuji; X. Li; M. Caricato; A. V. Marenich; J. Bloino; B. G. Janesko; R. Gomperts; B. Mennucci; H. P. Hratchian; J. V. Ortiz; A. F. Izmaylov; J. L. Sonnenberg; Williams; F. Ding; F. Lipparini; F. Egidi; J. Goings; B. Peng; A. Petrone; T. Henderson; D. Ranasinghe; V. G. Zakrzewski; J. Gao; N. Rega; G. Zheng; W. Liang; M. Hada; M. Ehara; K. Toyota; R. Fukuda; J. Hasegawa; M. Ishida; T. Nakajima; Y. Honda; O. Kitao; H. Nakai; T. Vreven; K. Throssell; J. A. Montgomery Jr.; J. E. Peralta; F. Ogliaro; M. J. Bearpark; J. J. Heyd; E. N. Brothers; K. N. Kudin; V. N. Staroverov; T. A. Keith; R. Kobayashi; J. Normand; K. Raghavachari; A. P. Rendell; J. C. Burant; S. S.

- Iyengar; J. Tomasi; M. Cossi; J. M. Millam; M. Klene; C. Adamo; R. Cammi; J. W. Ochterski; R. L. Martin; K. Morokuma; O. Farkas; J. B. Foresman; D. J. Fox *Gaussian 16 Rev. C.01*, Wallingford, CT, 2016.
- (14) Y. Zhao; D. G. Truhlar. The M06 suite of density functionals for main group thermochemistry, thermochemical kinetics, noncovalent interactions, excited states, and transition elements: two new functionals and systematic testing of four M06-class functionals and 12 other functionals. *Theor. Chem. Acc.* **2008**, *120*, 215.
- (15) V. Barone; M. Cossi. Quantum Calculation of Molecular Energies and Energy Gradients in Solution by a Conductor Solvent Model. *J. Phys. Chem. A* **1998**, *102*, 1995.
- (16) M. Cossi; N. Rega; G. Scalmani; V. Barone. Energies, structures, and electronic properties of molecules in solution with the C-PCM solvation model. *J. Comput. Chem.* **2003**, *24*, 669.
- (17) Y. Liu; A. Sengupta; K. Raghavachari; A. H. Flood. Anion Binding in Solution: Beyond the Electrostatic Regime. *Chem.* **2017**, *3*, 411.
- (18) F. L. Hirshfeld. Bonded-atom fragments for describing molecular charge densities. *Theor. Chim. Acta* **1977**, *44*, 129.
- (19) S. Mirzaei; H. Khosravi. Predicting the regioselectivity of nucleophilic addition to arynes using frontier molecular orbital contribution analysis. *Tetrahedron Lett.* **2017**, *58*, 3362.
- (20) Y. Liu; W. Zhao; C.-H. Chen; A. H. Flood. Chloride capture using a C–H hydrogen-bonding cage. *Science* **2019**, *365*, 159.
